# Supplementary material for: Diversity of Maize Shoot Apical Meristem Architecture and Its Relationship to Plant Morphology
Source: Oxford University Press journal article supplement (doi:10.1534/g3.115.017541), 2015-03-10

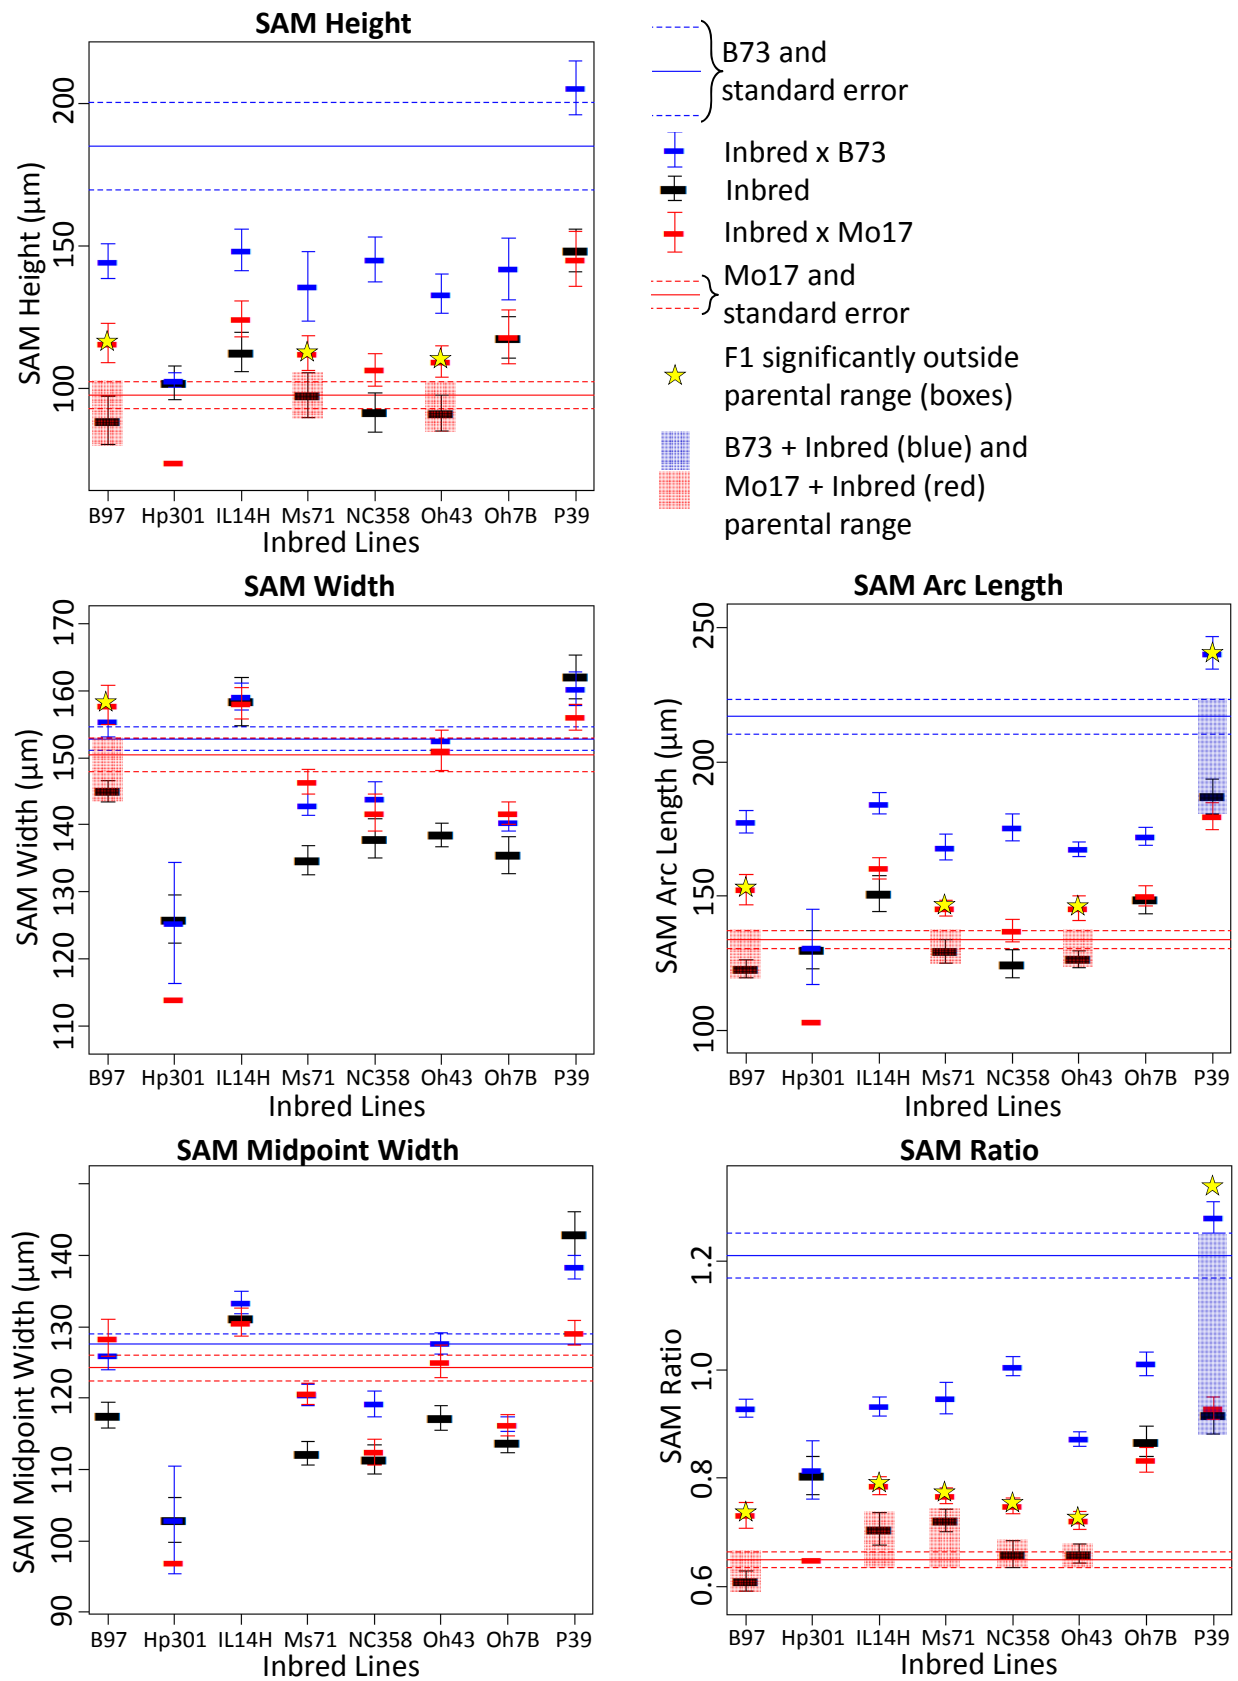

Supplement: 017541_figures2.pdf [file 017541_figures2.pdf]
