# Supplementary material for: Diversity of Maize Shoot Apical Meristem Architecture and Its Relationship to Plant Morphology
Source: Oxford University Press journal article supplement (doi:10.1534/g3.115.017541), 2015-03-10
Supplement: 017541_figures3.pdf [file 017541_figures3.pdf]

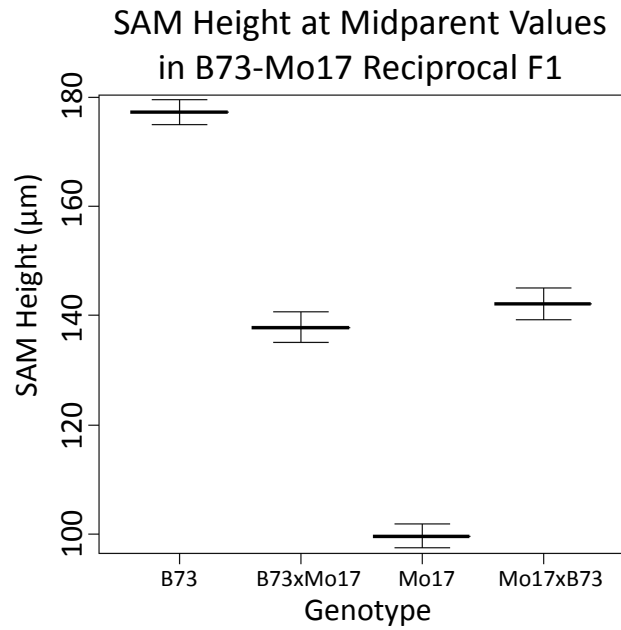

**Figure S3. SAM height in B73-Mo17 reciprocal crosses.** Reciprocal crosses between B73 and Mo17 show F1 SAM height near midparent values, indicating a lack of heterosis for meristem height in this cross and absence of parental effects.
