# Supplementary material for: Diversity of Maize Shoot Apical Meristem Architecture and Its Relationship to Plant Morphology
Source: G3 (Bethesda). 2015 Mar 5;5(5):819–27. doi: 10.1534/g3.115.017541 (PMC4426368; doi:10.1534/g3.115.017541)
Supplement: Supporting Information [file supp_g3.115.017541_TableS1.xlsx]

## Sheet: TableS1
Table S1. Lines used in experiments
27 NAM FOUNDERS	CML277 RILs	P39 RILs	REPRESENTATIVE IBMRIL	F1 CROSSES AND INBREDS	TIME COURSE
B73	Z005E0001	Z024E0001	MO007	B97 x B73	CML277
B97	Z005E0005	Z024E0002	MO032	B97 x Mo17	Ms71
CML103	Z005E0007	Z024E0005	MO262	B97	B97
CML228	Z005E0008	Z024E0008	MO272	Hp301 x B73	Hp301
CML247	Z005E0010	Z024E0009	MO275	Hp301 x Mo17	NC358
CML277	Z005E0012	Z024E0010	MO311	Hp301	Oh43
CML322	Z005E0013	Z024E0011	MO322	IL14H x B73	IL14H
CML333	Z005E0015	Z024E0013	MO325	IL14H x Mo17	Oh7B
CML52	Z005E0016	Z024E0014	MO357	IL14H	CML61
CML69	Z005E0019	Z024E0015	MO369	Ms71 x B73	Ki14
Hp301	Z005E0020	Z024E0016		Ms71 x Mo17	CO255
IL14H	Z005E0021	Z024E0019		Ms71	CS405
Ki11	Z005E0022	Z024E0020		NC358 x B73	NC296
Ki3	Z005E0025	Z024E0021		NC358 x Mo17	P39
Ky21	Z005E0027	Z024E0022		NC358	Mo18W
M162W	Z005E0028	Z024E0023		Oh43 x B73	B73
M37W	Z005E0029	Z024E0024		Oh43 x Mo17	Mo17
Mo17	Z005E0032	Z024E0025		Oh43
Mo18W	Z005E0033	Z024E0027		Oh7B x B73
Ms71	Z005E0035	Z024E0028		Oh7B x Mo17
NC350	Z005E0037	Z024E0029		Oh7B
NC358	Z005E0039	Z024E0030		P39 x B73
Oh43	Z005E0042	Z024E0033		P39 x Mo17
Oh7B	Z005E0043	Z024E0034		P39
P39	Z005E0044	Z024E0035		B73
Tx303	Z005E0045	Z024E0036		Mo17
Tzi8	Z005E0046	Z024E0037
	Z005E0047	Z024E0038
	Z005E0048	Z024E0040
	Z005E0049	Z024E0041
	Z005E0051	Z024E0042
	Z005E0055	Z024E0043
	Z005E0056	Z024E0044
	Z005E0057	Z024E0045
	Z005E0058	Z024E0046
	Z005E0060	Z024E0047
	Z005E0061	Z024E0048
	Z005E0062	Z024E0049
	Z005E0063	Z024E0050
	Z005E0066	Z024E0051
	Z005E0068	Z024E0053
	Z005E0069	Z024E0056
	Z005E0074	Z024E0057
	Z005E0075	Z024E0058
	Z005E0079	Z024E0059
	Z005E0080	Z024E0060
	Z005E0081	Z024E0061
	Z005E0082	Z024E0062
	Z005E0083	Z024E0063
	Z005E0084	Z024E0068
	Z005E0085	Z024E0069
	Z005E0087	Z024E0071
	Z005E0088	Z024E0072
	Z005E0090	Z024E0073
	Z005E0091	Z024E0074
	Z005E0092	Z024E0075
	Z005E0093	Z024E0076
	Z005E0094	Z024E0077
	Z005E0095	Z024E0078
	Z005E0096	Z024E0079
	Z005E0097	Z024E0080
	Z005E0099	Z024E0081
	Z005E0100	Z024E0082
	Z005E0102	Z024E0084
	Z005E0104	Z024E0085
	Z005E0105	Z024E0086
	Z005E0106	Z024E0088
	Z005E0107	Z024E0089
	Z005E0108	Z024E0090
	Z005E0109	Z024E0091
	Z005E0110	Z024E0092
	Z005E0111	Z024E0093
	Z005E0112	Z024E0094
	Z005E0113	Z024E0095
	Z005E0114	Z024E0096
	Z005E0115	Z024E0097
	Z005E0116	Z024E0098
	Z005E0117	Z024E0099
	Z005E0118	Z024E0100
	Z005E0119	Z024E0101
	Z005E0121	Z024E0102
	Z005E0122	Z024E0103
	Z005E0123	Z024E0107
	Z005E0124	Z024E0108
	Z005E0126	Z024E0110
	Z005E0127	Z024E0111
	Z005E0128	Z024E0112
	Z005E0129	Z024E0113
	Z005E0130	Z024E0115
	Z005E0131	Z024E0116
	Z005E0133	Z024E0117
	Z005E0134	Z024E0118
	Z005E0135	Z024E0119
	Z005E0136	Z024E0120
	Z005E0137	Z024E0121
	Z005E0138	Z024E0122
	Z005E0139	Z024E0123
	Z005E0141	Z024E0124
	Z005E0142	Z024E0126
	Z005E0144	Z024E0127
	Z005E0145	Z024E0128
	Z005E0146	Z024E0129
	Z005E0147	Z024E0130
	Z005E0148	Z024E0131
	Z005E0149	Z024E0132
	Z005E0150	Z024E0133
	Z005E0151	Z024E0135
	Z005E0154	Z024E0136
	Z005E0155	Z024E0137
	Z005E0156	Z024E0141
	Z005E0158	Z024E0142
	Z005E0159	Z024E0144
	Z005E0160	Z024E0145
	Z005E0162	Z024E0147
	Z005E0163	Z024E0152
	Z005E0164	Z024E0157
	Z005E0166	Z024E0159
	Z005E0168	Z024E0163
	Z005E0169	Z024E0164
	Z005E0170	Z024E0165
	Z005E0171	Z024E0166
	Z005E0172	Z024E0167
	Z005E0173	Z024E0168
	Z005E0174	Z024E0170
	Z005E0175	Z024E0172
	Z005E0176	Z024E0180
	Z005E0179	Z024E0182
	Z005E0181	Z024E0183
	Z005E0183	Z024E0186
	Z005E0184	Z024E0188
	Z005E0185	Z024E0189
	Z005E0186	Z024E0191
	Z005E0190	Z024E0192
	Z005E0192	Z024E0193
	Z005E0193	Z024E0195
	Z005E0195	Z024E0196
	Z005E0196	Z024E0199
	Z005E0197
	Z005E0198
	Z005E0199
