# Supplementary material for: Diversity of Maize Shoot Apical Meristem Architecture and Its Relationship to Plant Morphology
Source: G3 (Bethesda). 2015 Mar 5;5(5):819–27. doi: 10.1534/g3.115.017541 (PMC4426368; doi:10.1534/g3.115.017541)
Supplement: Supporting Information [file supp_g3.115.017541_TableS2.xlsx]

## Sheet: TableS2
Table S2. SAM architecture traits across NAM founders
NAM FOUNDER LINE	SAM HEIGHT (μm)	SAM ARC LENGTH (μm)	SAM WIDTH (μm)	SAM MIDPOINT WIDTH (μm)	SAM VOLUME (million μm3)	SAM HEIGHT:WIDTH RATIO	SAM PLASTOCHRON INTERNODE (μm)	SAM CELL COUNT IN ARC	SAM ARC CELL SIZE (μm)
B73	178	208	142	117	4.55	1.25	77.2286	21.9	9.42
B97	103	139	140	116	1.48	0.73	52.4243	17.7	8.15
CML103	129	158	125	109	2	1.03	61.5361	17.2	9.32
CML228	105	136	132	108	1.41	0.79	60.7444	16	8.25
CML247	113	148	138	117	1.65	0.81	59.7476	17.1	8.78
CML277	90	119	116	99	9.39	0.77	46.7481	13.3	9.12
CML322	101	132	126	107	1.24	0.8	61.1667	14.8	8.6
CML333	134	168	138	122	2.37	0.97	62.7167	19.5	8.66
CML52	131	157	121	100	2.04	1.08	59.2778	18.1	8.72
CML69	94	126	133	109	1.13	0.7	63.75	14.6	8.91
HP301	109	140	130	109	1.47	0.83	63.9046	13.5	10.15
IL14H	131	171	169	138	2.9	0.77	78.6845	18.8	9.14
Ki11	102	137	137	118	1.34	0.74	65.45	14.5	9.64
Ki3	117	150	141	116	1.91	0.82	60.3571	14.7	10.24
Ky21	125	157	134	112	2.1	0.93	59.3148	17.6	9.22
M162W	111	138	130	101	1.49	0.85	61.1852	16	8.75
M37W	133	160	127	105	2.22	1.04	67.5714	16.5	8.9
Mo17	114	152	158	131	1.99	0.72	72.8667	15.7	9.45
Mo18W	172	207	160	133	4.6	1.07	65.3381	21.9	9.62
Ms71	101	132	134	110	1.37	0.74	58.5833	13.6	9.1
NC350	121	156	146	124	2.02	0.83	70.0333	17.1	9.08
NC358	110	145	148	119	1.74	0.75	57.0167	16	9.11
Oh43	116	155	151	127	1.93	0.77	58.6561	17	9.23
Oh7B	141	172	139	114	2.7	1.01	68.3704	18	9.44
P39	179	217	159	135	4.96	1.12	70	23.7	8.84
Tx303	109	147	146	124	1.75	0.74	54.9704	15.6	9.04
Tzi8	127	162	149	122	2.29	0.85	70.5595	15.7	10.37
