# Supplementary material for: Diversity of Maize Shoot Apical Meristem Architecture and Its Relationship to Plant Morphology
Source: G3 (Bethesda). 2015 Mar 5;5(5):819–27. doi: 10.1534/g3.115.017541 (PMC4426368; doi:10.1534/g3.115.017541)
Supplement: Supporting Information [file supp_g3.115.017541_TableS3.xlsx]

## Sheet: TableS3
Table S3. Correlation values for SAM traits with adult plant traits
Z005: CML277 x B73	SAM HEIGHT	SAM ARC LENGTH	SAM WIDTH	SAM MIDPOINT WIDTH	SAM VOLUME	SAM HEIGHT:WIDTH RATIO	SAM P2-P1 DIFFERENCE
DAYS TO SILK	-0.224735	-0.131016	-0.147323	-0.167625	-0.106263	-0.132485	-0.0322159
DAYS TO TASSEL	-0.218279	-0.123764	-0.142756	-0.159291	-0.0771577	-0.138216	-0.0220387
GDD TO SILK	-0.194747	-0.170278	-0.180873	-0.132987	-0.121347	-0.182496	-0.0911887
GDD TO TASSEL	-0.188603	-0.117838	-0.130963	-0.125298	-0.0742585	-0.126645	-0.0387462
UPPER LEAF ANGLE	0.184104	-0.168821	-0.117208	0.171969	0.0875835	-0.114065	-0.305849
MIDDLE LEAF ANGLE	0.0765438	-0.210806	-0.18874	0.00628587	-0.132852	-0.167378	-0.291063
COB DIAMETER	0.24921	-0.051397	-0.00425075	0.177655	0.0688989	0.0498563	-0.211876
EAR DIAMETER	0.269959	0.044647	0.0788906	0.161202	0.0748759	0.115022	-0.106612
EAR LENGTH	0.157588	0.209538	0.224231	0.154823	0.124531	0.253043	0.137428
SEED SET LENGTH	0.139867	0.122113	0.140546	0.120972	0.127486	0.168818	0.0538529
EAR ROW NUMBER	0.307751	0.0849424	0.11882	0.231472	0.139667	0.146752	-0.0791351
TOTAL KERNEL VOLUME	0.273439	0.1602	0.18519	0.231133	0.00846191	0.219187	0.0235072
EAR WEIGHT	0.272102	0.0999598	0.127404	0.178566	0.110687	0.175101	-0.0423553
EAR RANK NUMBER	0.0635973	0.20595	0.196059	0.0479632	0.04522	0.191409	0.193641
Z024: P39 x B73	SAM HEIGHT	SAM ARC LENGTH	SAM WIDTH	SAM MIDPOINT WIDTH	SAM VOLUME	SAM HEIGHT:WIDTH RATIO	SAM P2-P1 DIFFERENCE
DAYS TO SILK	-0.372641	-0.169837	-0.197602	-0.345445	-0.159795	-0.181481	0.0249436
DAYS TO TASSEL	-0.362368	-0.19856	-0.218405	-0.317531	-0.0841261	-0.213741	-0.00974364
GDD TO SILK	-0.380117	-0.191654	-0.224288	-0.361522	-0.169385	-0.19197	-0.00433345
GDD TO TASSEL	-0.379895	-0.253043	-0.278738	-0.353806	-0.128055	-0.255347	-0.0677783
EAR HEIGHT	-0.257873	-0.0999007	-0.132343	-0.232371	-0.0656026	-0.133279	0.0428984
LEAF LENGTH	-0.244026	-0.269287	-0.271553	-0.168734	0.0370334	-0.24666	-0.172177
LEAF WIDTH	-0.0901026	-0.389223	-0.37679	-0.117407	-0.125682	-0.357973	-0.376666
COB WEIGHT	-0.153178	-0.21689	-0.227533	-0.160618	-0.0325193	-0.188928	-0.173106
Values are the correlation coefficient r
To be considered significant (bold values), correlations had to be significant (at p<0.05) for at least half of the replications as well as for the overall mean (shown here).
List of all adult traits examined (see panzea for trait definitions and experimental details):
Brace_root_number			PropHeight
Days_to_tassel			TotalNodes
Days_to_silking			NodesBelowEar
Ear_height			NodesEarToTassel
Leaf_length			BRCRTS
Leaf_width			LowerLeafAngle
Main_spike_length			UpperLeafAngle
Middle_leaf_angle			LeafWidth
Node_number_ear_to_root			LeafLength
Node_number_tassel_to_ear			RPR
Plant_height			StalkWidth
Tassel_length			StalkHeight
Tassel_primary_branch_number			10KWeight
Upper_leaf_angle			EarDiameter
GDD_Days_to_tassel			CobDiameter
GDD_Days_to_silk			KernelHeight
NumEars			PropDiameter
PlantYield			EarLength
TasselLength			LengthSeedSet
SpikeLength			PropFill
PROPTASS			RowNumber
TasselBranchCount			CobWeight
TasselAngle			TotalKernelWeight
PlantHeight			EarWeight
EarHeight			TotalKVolume
Indicate at the top of the table that the height, width etc. are from the SAM
