# Supplementary material for: Diversity of Maize Shoot Apical Meristem Architecture and Its Relationship to Plant Morphology
Source: G3 (Bethesda). 2015 Mar 5;5(5):819–27. doi: 10.1534/g3.115.017541 (PMC4426368; doi:10.1534/g3.115.017541)
Supplement: Supporting Information [file supp_g3.115.017541_TableS4.xlsx]

## Sheet: TableS4
Table S4. QTL across populations.
QTL	CHR	LOD	PVEa	EFFECTb	bp RANGEc	bp DISTANCE	# TOTAL GENES	# EXPRESSED GENES	COINCIDENT QTLs IN POP	COINCIDENT CROSS-POP
Z005_height_2	1	3.7098	7.9	5.5203	263603731 - 276209661	12605930	315	162	volume, arc, midwidth, width	Z024:width
Z005_arc_1	1	3.3495	7.3	5.4008	263603731 - 279682238	16078507	423	216	volume, height, midwidth, width	Z024:width
Z005_volume_2	1	3.4099	7.7	1.87e5	263603731 - 279682238	16078507	423	216	height, arc, midwidth, width	Z024:width
Z005_midwidth_1	1	5.4618	12	3.4859	263603731 - 285650152	22046421	589	287	volume, height, arc, width	Z024:width, ratio
Z005_width_1	1	4.6424	10.9	3.7973	273305618 - 281206812	7901194	243	123	volume, height, arc, midwidth	Z024:ratio
Z005_ratio_1	1	5.3146	11.8	0.0443	64239480 - 107187523	42948043	662	266	height, volume
Z005_volume_1	1	3.1252	6.9	1.71e5	88998955 - 148458078	59459123	540	176	ratio, height
Z005_height_1	1	3.7258	8.7	5.5923	88998955 - 195557990	106559035	1321	472	ratio, volume
Z005_ratio_2	3	10.5899	25.1	0.0654	12132193 - 21368486	9236293	233	78	volume, arc, height
Z005_p2p1diff_1	3	6.7374	14.2	3.4566	1298537 - 6739219	5673605	199	108
Z005_width_2	3	3.3296	7.6	3.2495	216417210 - 223179497	6762287	231	105
Z005_arc_2	3	5.1205	13.2	7.0628	8300032 - 21368486	13068454	331	124	volume, height, ratio
Z005_height_3	3	5.868	14.2	7.2069	8300032 - 21368486	13068454	331	124	volume, arc, ratio
Z005_volume_3	3	4.5573	12.3	2.30e5	8300032 - 21368486	13068454	331	124	arc, height, ratio
Z005_midwidth_2	6	5.6386	12.2	3.3899	143696195 - 148634319	4938124	129	64	width
Z005_width_3	6	3.8814	8.7	3.3167	143696195 - 154345567	10649372	324	151	midwidth
Z005_midwidth_3	9	3.532	8	2.7658	114072155 - 129011584	14939429	330	130
Z024_midwidth_1	1	5.6107	10.2	-4.1763	238343143 - 259375688	21032545	470	215	width	IBM:height, arc
Z024_width_1	1	5.4706	12.8	-4.812	253029622 - 269324476	16294854	416	205	midwidth	Z005:height, arc, volume, midwidth; IBM:height, arc
Z024_ratio_1	1	3.1854	6.5	0.0427	281206812 - 289547937	8341125	236	117		Z005:width, midwidth
Z024_height_1	2	3.8394	8.1	7.8801	47158891 - 93130728	45971837	514	179	ratio
Z024_ratio_2	2	5.6606	11.6	0.0561	48109181 - 189447059	141337878	1797	615	height
Z024_arc_1	4	11.1592	27.9	-15.8962	178580488 - 188385744	9805256	269	136	volume, height, midwidth, ratio
Z024_volume_1	4	9.3767	23.2	-7.95e5	178580488 - 188385744	9805256	269	136	arc, height, midwidth, ratio
Z024_midwidth_2	4	6.5962	13	-4.7698	178889832 - 184547096	5657264	137	73	arc, volume, height, ratio
Z024_p2p1diff_1	4	2.9348	6.2	-2.561	178889832 - 184547096	5657264	137	73	arc, volume, height, midwidth, ratio
Z024_height_2	4	10.3953	25.3	-14.3102	178889832 - 188385744	9495912	255	129	arc, volume, midwidth, ratio
Z024_ratio_4	4	10.3073	25.8	-0.0858	187355764 - 230190074	42834310	800	329	arc, volume, height, midwidth
Z024_ratio_3	4	3.1395	6.1	0.0449	66909481 - 144840177	77930696	721	257
Z024_midwidth_3	5	5.7351	13.1	-4.5552	205308574 - 209682546	4373972	166	73	width
Z024_width_2	5	3.4267	9.3	-4.0278	205308574 - 209682546	4373972	166	73	midwidth
Z024_midwidth_4	8	3.5331	6.5	-3.2892	115134656 - 119831079	4696423	108	47
Z024_width_3	10	3.4919	7.5	-3.5854	139978756 - 144469845	4491089	170	100	midwidth
Z024_midwidth_5	10	3.6976	7.2	-3.355	139978756 - 146999603	7020847	170	100	width
aPhenotypic Variation Explained, as percent								AVERAGE: 175
bEffect is substitution of CML277 (Z005) or P39 (Z024) allele with B73.								TOTAL: 3323
cQTL intervals calculated by 1-LOD drop.
