# Supplementary material for: Diversity of Maize Shoot Apical Meristem Architecture and Its Relationship to Plant Morphology
Source: G3 (Bethesda). 2015 Mar 5;5(5):819–27. doi: 10.1534/g3.115.017541 (PMC4426368; doi:10.1534/g3.115.017541)
Supplement: Supporting Information [file supp_g3.115.017541_TableS5.xlsx]

## Sheet: NAM founders raw
Supplementary data table S5. Raw SAM architecture data from NAM founder inbreds, from three different growouts ("block")
number	line	block	row	sample	SAM_width	SAM_height	SAM_midpoint.width	SAM_arc.length	SAM_p1.length	SAM_cell.number	SAM_volume	SAM_height.width.ratio	SAM_cell.size
					(µm)	(µm)	(µm)	(µm)	(µm)	(cells)	(µm3)		(µm)
1	B73	G	1	1	147.091	190.999	120.198	220.11	86	23	5.2711e+06	1.29851	9.57
1	B73	G	1	2	132.821	155.507	110.135	183.866	16	20	3.04633e+06	1.1708	9.1933
1	B73	G	1	3	137.212	211.855	119.649	238.775	99	23	6.54501e+06	1.544	10.3815
1	B73	G	1	4	152.031	181.12	124.588	211.28	91	21	4.75494e+06	1.19134	10.061
1	B73	G	1	5	146.542	207.464	113.611	234.941	124	24	6.42503e+06	1.41573	9.78921
1	B73	G	1	6	139.956	183.315	122.942	215.19	91	21	4.63553e+06	1.3098	10.2471
1	B73	G	1	7	141.603	219.539	128.979	250.263	116	26	7.26899e+06	1.55038	9.6255
1	B73	G	1	8	134.651	154.409	107.208	184.41	22	20	3.02699e+06	1.14673	9.2205
1	B73	G	1	9	136.48	169.777	118.918	201.97	58	17	3.8042e+06	1.24397	11.8806
1	B73	G	1	10	128.979	187.706	113.063	215.199	89	22	4.68908e+06	1.45532	9.78177
2	B97	G	2	1	145.993	120.198	125.686	155.324	75	NA	1.91532e+06	0.823313	NA
2	B97	G	2	2	146.199	109.649	119.152	149.655	115	16	1.61061e+06	0.749998	9.35344
2	B97	G	2	3	157.895	133.772	126.462	174.337	126	23	2.56308e+06	0.847221	7.57987
2	B97	G	2	4	143.275	126.462	133.041	169.386	84	18	2.07839e+06	0.882652	9.41033
2	B97	G	2	5	NA	NA	NA	NA	NA	NA	NA	NA	NA
2	B97	G	2	6	139.773	117.453	125.504	150.432	108	20	1.74947e+06	0.840313	7.5216
2	B97	G	2	7	140.505	111.416	125.137	146.054	99	19	1.58793e+06	0.792968	7.68705
2	B97	G	2	8	135.965	95.76	113.304	127.19	27	15	1.15496e+06	0.704299	8.47933
3	CML52	G	3	1	115.258	126.601	103.183	157.535	59	NA	1.7229e+06	1.09841	NA
3	CML52	G	3	2	107.025	129.802	93.579	152.072	61	16	1.72896e+06	1.21282	9.5045
3	CML52	G	3	3	113.429	102.452	99.158	131.189	8	15	1.08071e+06	0.903226	8.74593
3	CML52	G	3	4	138.675	152.945	107.208	187.126	129	26	3.02831e+06	1.1029	7.19715
3	CML52	G	3	5	130.626	157.336	107.574	184.436	106	20	3.09356e+06	1.20448	9.2218
3	CML52	G	3	6	119.1	121.021	98.518	152.541	24	16	1.6022e+06	1.01613	9.53381
3	CML52	G	3	7	121.112	139.407	100.256	164.14	95	20	2.22158e+06	1.15106	8.207
3	CML52	G	3	8	109.769	109.404	91.475	132.255	18	16	1.20331e+06	0.996675	8.26594
3	CML52	G	3	9	118.917	123.308	101.72	156.399	34	NA	1.66645e+06	1.03692	NA
4	CML69	G	4	1	140.505	97.33	112.148	131.19	93	15	1.23732e+06	0.692716	8.746
4	CML69	G	4	2	122.576	85.254	97.329	113.616	127	14	827466	0.69552	8.11543
4	CML69	G	4	3	124.04	102.086	106.842	132.239	74	14	1.17386e+06	0.823009	9.44564
4	CML69	G	4	4	134.651	95.134	115.258	129.499	84	NA	1.12817e+06	0.706523	NA
4	CML69	G	4	5	111.965	80.132	93.578	109.22	58	15	663896	0.715688	7.28133
4	CML69	G	4	6	130.626	91.109	106.111	118.53	81	13	1.00648e+06	0.69748	9.11769
4	CML69	G	4	7	118.185	82.327	98.427	113.092	38	13	743734	0.696594	8.69938
4	CML69	G	4	8	154.409	126.235	127.333	161.892	138	19	2.23518e+06	0.817537	8.52063
5	CML103	G	5	1	120.746	116.722	105.013	146.028	13	15	1.50092e+06	0.966674	9.7352
5	CML103	G	5	2	115.624	108.672	106.476	135.574	7	12	1.2425e+06	0.939874	11.2978
5	CML103	G	5	3	107.025	98.061	95.499	128.959	37	13	934816	0.916244	9.91992
5	CML103	G	5	4	116.356	119.283	98.427	149.272	78	14	1.52284e+06	1.02516	10.6623
5	CML103	G	5	5	104.281	102.086	95.866	129.011	29	NA	993003	0.978951	NA
5	CML103	G	5	6	122.942	113.063	102.817	142.702	13	12	1.42785e+06	0.919645	11.8918
5	CML103	G	5	7	116.356	115.258	102.818	140.508	7	14	1.41448e+06	0.990563	10.0363
5	CML103	G	5	8	119.283	128.064	102.086	155.906	82	14	1.81527e+06	1.07361	11.1361
6	CML228	G	6	1	129.528	88.547	107.209	123.482	17	13	946905	0.683613	9.49862
6	CML228	G	6	2	149.835	108.672	118.917	144.364	51	15	1.63006e+06	0.725278	9.62427
6	CML228	G	6	3	121.844	97.329	100.622	128.429	107	17	1.05018e+06	0.7988	7.55465
6	CML228	G	6	4	145.445	112.331	111.233	143.777	120	15	1.67532e+06	0.772326	9.58513
6	CML228	G	6	5	116.356	104.83	105.013	135.553	24	NA	1.16053e+06	0.900942	NA
6	CML228	G	6	6	134.651	143.798	110.868	171.253	42	NA	2.58072e+06	1.06793	NA
6	CML228	G	6	7	132.455	98.061	101.72	127.908	37	NA	1.16933e+06	0.740334	NA
7	CML247	G	7	1	127.924	118.421	104.532	146.36	115	17	1.63054e+06	0.925714	8.60941
7	CML247	G	7	2	121.345	87.719	103.07	118.993	31	14	860631	0.722889	8.4995
7	CML247	G	7	3	135.234	113.304	113.304	154.05	28	18	1.57534e+06	0.837837	8.55833
7	CML247	G	7	4	139.62	115.258	117.69	149.852	18	18	1.68402e+06	0.825512	8.32511
7	CML247	G	7	5	138.889	108.918	115.497	146.367	38	17	1.50162e+06	0.784209	8.60982
7	CML247	G	7	6	127.924	123.538	115.497	155.153	88	16	1.78109e+06	0.965714	9.69706
7	CML247	G	7	7	130.117	95.029	103.801	126.65	27	12	1.08114e+06	0.730335	10.5542
8	CML277	G	8	1	100.623	65.13	82.693	88.345	5	11	403619	0.647268	8.03136
8	CML277	G	8	2	120.381	99.524	109.404	130.636	42	16	1.08253e+06	0.826742	8.16475
8	CML277	G	8	3	118.917	97.329	102.086	124.552	67	12	1.02325e+06	0.818462	10.3793
8	CML277	G	8	4	100.439	58.727	82.602	83.406	3	9	338700	0.584703	9.26733
8	CML277	G	8	5	124.772	79.034	105.013	109.743	26	9	741667	0.633427	12.1937
8	CML277	G	8	6	112.331	72.814	88.182	99.329	15	NA	562942	0.648209	NA
8	CML277	G	8	7	101.811	92.206	95.774	120.193	54	NA	785790	0.905659	NA
8	CML277	G	8	8	110.867	78.668	95.499	109.261	46	10	634632	0.709571	10.9261
8	CML277	G	8	9	112.697	77.57	94.402	105.961	37	10	631269	0.688306	10.5961
9	CML322	G	9	1	125.503	95.499	109.038	129.514	38	11	1.04673e+06	0.76093	11.774
9	CML322	G	9	2	111.233	70.618	93.67	100.974	13	10	527510	0.634866	10.0974
9	CML322	G	9	3	124.771	117.087	108.672	147.623	46	NA	1.55628e+06	0.938415	NA
9	CML322	G	9	4	130.992	115.258	111.965	143.846	71	14	1.57834e+06	0.879886	10.2747
9	CML322	G	9	5	123.308	101.354	109.404	128.481	61	NA	1.15033e+06	0.821958	NA
9	CML322	G	9	6	136.48	139.407	118.551	173.426	105	21	2.4383e+06	1.02145	8.25838
9	CML322	G	9	7	121.844	103.915	102.086	132.265	55	16	1.19336e+06	0.852853	8.26656
9	CML322	G	9	8	125.87	96.963	111.599	128.98	23	16	1.0806e+06	0.770342	8.06125
9	CML322	G	9	9	143.066	125.503	124.405	163.068	102	18	2.04381e+06	0.877238	9.05933
10	CML333	G	10	1	136.114	165.203	125.138	195.96	126	NA	3.5627e+06	1.21371	NA
10	CML333	G	10	2	129.528	98.793	113.428	130.591	14	14	1.15576e+06	0.762715	9.32793
10	CML333	G	10	3	128.979	142.7	121.478	177.274	133	NA	2.45372e+06	1.10638	NA
10	CML333	G	10	4	154.775	138.31	137.944	176.209	81	19	2.68646e+06	0.89362	9.27416
10	CML333	G	10	5	122.942	105.379	109.769	137.77	38	NA	1.2382e+06	0.857144	NA
10	CML333	G	10	6	118.552	106.477	112.331	138.902	32	NA	1.21974e+06	0.898146	NA
10	CML333	G	10	7	125.137	119.283	118.918	156.381	32	15	1.62217e+06	0.953219	10.4254
10	CML333	G	10	8	129.528	103.549	117.82	136.136	9	19	1.26358e+06	0.799433	7.16505
10	CML333	G	10	9	141.055	150.933	125.137	188.839	118	NA	2.97962e+06	1.07003	NA
10	CML333	G	10	10	136.663	104.281	113.063	135.574	3	13	1.3586e+06	0.763052	10.4288
11	HP301	G	11	1	125.87	110.501	103.549	139.39	92	12	1.39397e+06	0.877898	11.6158
11	HP301	G	11	2	147.091	133.919	114.893	167.918	148	NA	2.39537e+06	0.91045	NA
11	HP301	G	11	3	122.21	77.57	102.817	110.325	10	11	699341	0.634727	10.0295
11	HP301	G	11	4	136.48	116.356	109.038	147.621	105	15	1.67594e+06	0.85255	9.8414
11	HP301	G	11	5	102.452	77.936	92.206	104.309	43	NA	569110	0.760707	NA
11	HP301	G	11	6	114.526	78.668	96.048	106.475	13	9	660110	0.686901	11.8306
11	HP301	G	11	7	111.233	103.915	99.524	131.192	46	13	1.09243e+06	0.93421	10.0917
11	HP301	G	11	8	135.748	133.187	112.331	166.878	109	15	2.20084e+06	0.981134	11.1252
11	HP301	G	11	9	144.347	125.503	112.331	158.577	164	14	2.06195e+06	0.869453	11.3269
11	HP301	G	11	10	132.089	120.381	108.306	149.804	122	NA	1.73823e+06	0.911363	NA
12	Il14H	G	12	1	157.702	130.992	124.771	167.412	92	15	2.4562e+06	0.83063	11.1608
12	Il14H	G	12	2	128.796	90.012	99.89	120.189	11	NA	968216	0.698873	NA
12	Il14H	G	12	3	144.164	103.915	111.965	135.003	17	14	1.43564e+06	0.720811	9.64307
12	Il14H	G	12	4	188.072	147.823	138.31	183.911	161	15	3.7446e+06	0.785992	12.2607
12	Il14H	G	12	5	129.528	96.231	107.94	127.919	37	15	1.10062e+06	0.742936	8.52793
12	Il14H	G	12	6	154.775	119.649	130.626	155.845	59	15	2.02243e+06	0.773051	10.3897
12	Il14H	G	12	7	140.871	98.061	114.893	130.031	25	17	1.25791e+06	0.696105	7.64888
12	Il14H	G	12	8	148.189	103.549	123.308	138.866	9	15	1.47432e+06	0.698763	9.25773
13	Ki3	G	13	1	139.62	135.234	116.959	171.614	97	21	2.3302e+06	0.968586	8.1721
13	Ki3	G	13	2	127.193	119.883	111.842	152.413	37	17	1.66376e+06	0.942528	8.96547
13	Ki3	G	13	3	NA	NA	NA	NA	NA	NA	NA	NA	NA
13	Ki3	G	13	4	129.386	127.193	103.07	160.072	88	14	1.9136e+06	0.983051	11.4337
13	Ki3	G	13	5	146.199	134.503	122.076	167.267	93	16	2.40304e+06	0.919999	10.4542
13	Ki3	G	13	6	152.047	135.234	121.345	168.35	104	15	2.52268e+06	0.889422	11.2233
13	Ki3	G	13	7	152.047	139.62	119.152	173.768	86	19	2.69263e+06	0.918269	9.14568
13	Ki3	G	13	8	130.848	84.064	103.07	116.23	14	11	876251	0.642455	10.5664
14	Ki11	G	14	1	144.347	96.597	126.601	137.204	5	NA	1.26233e+06	0.6692	NA
14	Ki11	G	14	2	129.162	104.647	115.624	141.066	35	13	1.28561e+06	0.8102	10.8512
14	Ki11	G	14	3	147.823	102.086	134.285	142.705	40	12	1.43306e+06	0.690596	11.8921
14	Ki11	G	14	4	143.067	117.454	128.064	155.879	65	16	1.79248e+06	0.820972	9.74244
14	Ki11	G	14	5	142.701	100.256	123.308	137.744	48	14	1.32935e+06	0.70256	9.83886
14	Ki11	G	14	6	141.969	110.867	128.796	146.577	80	NA	1.59102e+06	0.780924	NA
14	Ki11	G	14	7	115.258	76.107	99.159	106.517	13	13	627852	0.660319	8.19362
14	Ki11	G	14	8	126.235	94.768	113.794	127.328	26	NA	1.03867e+06	0.750727	NA
14	Ki11	G	14	9	145.993	93.304	122.942	129.524	32	NA	1.20625e+06	0.639099	NA
14	Ki11	G	14	10	145.445	114.16	135.017	151.48	83	16	1.72736e+06	0.784902	9.4675
15	Ky21	G	15	1	144.896	184.413	125.686	219.552	133	21	4.80419e+06	1.27273	10.4549
15	Ky21	G	15	2	121.295	112.514	104.647	144.897	23	15	1.39585e+06	0.927606	9.6598
15	Ky21	G	15	3	138.31	151.482	119.283	183.898	101	20	2.958e+06	1.09524	9.1949
15	Ky21	G	15	4	127.333	105.379	110.501	136.134	25	17	1.28368e+06	0.827586	8.00788
16	M37W	G	16	1	129.119	150.547	106.042	174.725	NA	NA	2.77217e+06	1.16596	NA
16	M37W	G	16	2	120.654	92.811	103.184	123.505	29	14	949167	0.769233	8.82179
16	M37W	G	16	3	124.04	116.356	103.915	144.362	42	17	1.52786e+06	0.938052	8.49188
16	M37W	G	16	4	133.514	158.789	113.735	187.324	NA	NA	3.20789e+06	1.18931	NA
17	M162W	G	17	1	124.863	85.895	99.342	116.388	9	13	857710	0.687914	8.95292
17	M162W	G	17	2	125.273	128.569	113.735	154.948	NA	NA	1.90511e+06	1.02631	NA
17	M162W	G	17	3	117.728	89.188	94.128	114.16	9	12	856893	0.757577	9.51333
17	M162W	G	17	4	120.877	112.086	103.845	140.633	NA	NA	1.38044e+06	0.927273	NA
17	M162W	G	17	5	147.091	122.942	113.063	154.22	115	16	2.01753e+06	0.835823	9.63875
17	M162W	G	17	6	132.416	103.295	110.987	128.597	NA	NA	1.28833e+06	0.780079	NA
17	M162W	G	17	7	130.351	109.495	108.397	137.802	42	14	1.41796e+06	0.840001	9.843
17	M162W	G	17	8	120.328	115.932	105.493	146.103	NA	NA	1.47501e+06	0.963467	NA
18	Mo18W	G	18	1	154.775	181.486	132.456	216.253	132	20	4.83716e+06	1.17258	10.8126
18	Mo18W	G	18	2	171.789	175.631	138.675	212.397	161	23	4.87203e+06	1.02236	9.23465
18	Mo18W	G	18	3	128.43	140.139	110.867	168.507	85	NA	2.34876e+06	1.09117	NA
18	Mo18W	G	18	4	150.384	188.804	128.43	220.643	161	24	5.20074e+06	1.25548	9.19346
18	Mo18W	G	18	5	149.286	156.239	129.163	189.376	134	19	3.36432e+06	1.04658	9.96716
18	Mo18W	G	18	6	133.187	152.945	123.308	183.288	105	18	2.9387e+06	1.14835	10.1827
18	Mo18W	G	18	7	156.422	186.608	132.821	219.57	163	26	5.19545e+06	1.19298	8.445
19	Ms71	G	19	1	129.528	93.853	111.965	125.161	33	14	1.05121e+06	0.724577	8.94007
19	Ms71	G	19	2	142.151	119.649	112.697	147.079	164	16	1.8463e+06	0.841704	9.19244
20	NC350	G	20	1	147.64	110.867	122.576	147.085	54	15	1.66253e+06	0.750928	9.80567
20	NC350	G	20	2	102.817	109.038	93.67	136.709	62	15	1.13144e+06	1.06051	9.11393
20	NC350	G	20	3	147.092	109.038	122.942	141.612	10	14	1.60522e+06	0.741291	10.1151
20	NC350	G	20	4	137.944	109.404	114.893	143.857	36	16	1.50316e+06	0.793104	8.99106
20	NC350	G	20	5	136.846	100.622	111.965	131.17	14	13	1.2734e+06	0.735294	10.09
20	NC350	G	20	6	151.482	110.868	131.357	149.856	28	16	1.71259e+06	0.731889	9.366
20	NC350	G	20	7	124.772	101.72	110.135	132.285	12	17	1.17295e+06	0.815247	7.78147
20	NC350	G	20	8	148.189	139.041	122.21	172.32	96	17	2.60647e+06	0.938268	10.1365
21	NC358	G	21	1	167.947	146.359	127.333	182.164	139	NA	3.26271e+06	0.871459	NA
21	NC358	G	21	2	145.262	108.306	121.478	145.427	36	16	1.56267e+06	0.745591	9.08919
21	NC358	G	21	3	154.409	126.235	130.992	161.898	114	19	2.23518e+06	0.817537	8.52095
21	NC358	G	21	4	132.822	110.135	113.794	141.63	64	20	1.46248e+06	0.829192	7.0815
21	NC358	G	21	5	149.286	134.285	121.844	164.085	103	21	2.44312e+06	0.899515	7.81357
21	NC358	G	21	6	154.409	138.675	127.698	172.317	120	22	2.69473e+06	0.898102	7.83259
21	NC358	G	21	7	147.457	103.915	118.917	138.308	42	16	1.47483e+06	0.704714	8.64425
22	Oh7B	G	22	1	142.306	134.064	109.888	164.808	NA	NA	2.32779e+06	0.942083	NA
22	Oh7B	G	22	2	133.919	117.087	115.99	149.329	15	16	1.66509e+06	0.874312	9.33306
22	Oh7B	G	22	3	140.657	146.701	119.778	166.456	NA	NA	2.79286e+06	1.04297	NA
22	Oh7B	G	22	4	137.91	120.877	113.735	158.779	NA	NA	1.82757e+06	0.876492	NA
22	Oh7B	G	22	5	126.784	136.937	110.593	165.186	141	20	2.20889e+06	1.08008	8.2593
22	Oh7B	G	22	6	131.317	129.668	112.086	161.032	NA	NA	2.01963e+06	0.987443	NA
22	Oh7B	G	22	7	132.416	129.119	115.932	157.68	NA	NA	2.01618e+06	0.975101	NA
22	Oh7B	G	22	8	118.002	84.523	101.262	113.09	14	10	778354	0.716284	11.309
22	Oh7B	G	22	9	140.108	156.042	120.877	185.742	NA	NA	3.1923e+06	1.11373	NA
23	Oh43	G	23	1	140.139	105.379	123.674	140.507	31	16	1.42542e+06	0.751961	8.78169
23	Oh43	G	23	2	135.565	106.476	124.04	145.434	36	17	1.40049e+06	0.785424	8.55494
23	Oh43	G	23	3	144.164	124.405	129.162	163.016	53	16	2.02346e+06	0.862941	10.1885
23	Oh43	G	23	4	162.825	130.992	135.748	171.783	88	17	2.54067e+06	0.804496	10.1049
23	Oh43	G	23	5	151.482	117.819	132.456	158.049	46	16	1.91802e+06	0.777776	9.87806
23	Oh43	G	23	6	142.7	125.869	130.626	164.12	61	16	2.05066e+06	0.882053	10.2575
23	Oh43	G	23	7	141.969	97.695	121.478	131.733	56	13	1.26147e+06	0.688143	10.1333
24	P39	G	24	1	169.594	200.329	144.53	240.416	84	NA	6.47218e+06	1.18123	NA
24	P39	G	24	2	150.75	143.432	131.357	176.713	9	18	2.82506e+06	0.951456	9.81739
24	P39	G	24	3	154.41	156.97	132.456	190.425	14	21	3.4948e+06	1.01658	9.06786
24	P39	G	24	4	162.459	175.265	143.798	212.956	12	26	4.63546e+06	1.07883	8.19062
24	P39	G	24	5	178.192	191.731	158.434	232.21	50	NA	6.08113e+06	1.07598	NA
24	P39	G	24	6	150.75	157.336	132.09	188.826	20	20	3.44342e+06	1.04369	9.4413
24	P39	G	24	7	151.116	165.752	136.114	195.972	16	19	3.87079e+06	1.09685	10.3143
24	P39	G	24	8	160.263	179.29	130.26	217.836	50	22	4.82598e+06	1.11872	9.90164
24	P39	G	24	9	146.725	152.945	133.553	189.876	13	20	3.1663e+06	1.04239	9.4938
24	P39	G	24	10	160.995	169.411	140.505	208.022	26	23	4.27014e+06	1.05227	9.04443
25	Tx303	G	25	1	142.7	125.869	119.649	161.929	146	NA	2.05066e+06	0.882053	NA
25	Tx303	G	25	2	142.151	118.551	127.699	159.706	134	NA	1.81313e+06	0.833979	NA
25	Tx303	G	25	3	143.249	100.988	120.746	141.594	10	NA	1.35306e+06	0.704982	NA
25	Tx303	G	25	4	144.896	113.611	135.016	152.567	129	NA	1.7045e+06	0.784087	NA
25	Tx303	G	25	5	138.31	85.62	112.331	120.767	13	13	971837	0.619044	9.28977
25	Tx303	G	25	6	140.871	88.181	118.185	124.067	12	14	1.04622e+06	0.62597	8.86193
25	Tx303	G	25	7	116.356	77.57	102.086	105.409	22	NA	656799	0.666661	NA
25	Tx303	G	25	8	139.956	118.917	124.405	154.796	132	NA	1.79522e+06	0.849674	NA
25	Tx303	G	25	9	163.557	131.723	133.187	172.356	132	NA	2.58045e+06	0.805364	NA
26	Tzi8	G	26	1	143.432	141.603	114.893	173.441	89	15	2.63067e+06	0.987248	11.5627
26	Tzi8	G	26	2	150.019	113.794	117.087	148.224	5	12	1.77724e+06	0.758531	12.352
26	Tzi8	G	26	3	168.313	185.511	129.529	216.789	149	20	5.40656e+06	1.10218	10.8394
26	Tzi8	G	26	4	154.226	122.942	122.942	158.664	23	16	2.12132e+06	0.797155	9.9165
26	Tzi8	G	26	5	138.675	116.356	114.893	146.53	8	13	1.70354e+06	0.839055	11.2715
26	Tzi8	G	26	6	155.507	131.357	125.138	167.418	4	13	2.43417e+06	0.844702	12.8783
26	Tzi8	G	26	7	151.482	158.8	128.065	191.566	115	18	3.52774e+06	1.04831	10.6426
27	Mo17	G	27	1	166.85	144.164	140.871	186.056	113	19	3.14485e+06	0.864034	9.79242
27	Mo17	G	27	2	151.848	101.72	130.26	143.774	18	17	1.47214e+06	0.66988	8.45729
27	Mo17	G	27	3	165.02	135.016	137.944	170.683	120	19	2.73254e+06	0.81818	8.98332
27	Mo17	G	27	4	166.118	125.869	139.774	163.06	51	17	2.40812e+06	0.757708	9.59176
27	Mo17	G	27	5	152.945	118.917	122.21	153.678	85	15	1.97288e+06	0.777515	10.2452
27	Mo17	G	27	6	143.067	83.059	111.599	116.341	3	11	967639	0.58056	10.5765
27	Mo17	G	27	7	130.992	106.842	119.283	142.156	52	15	1.35852e+06	0.815638	9.47707
27	Mo17	G	27	8	157.703	100.256	125.138	139.027	32	16	1.50678e+06	0.635727	8.68919
27	Mo17	G	27	9	121.295	80.681	101.354	114.143	98	14	741127	0.665163	8.15307
27	Mo17	G	27	10	146.359	96.963	124.04	136.139	20	13	1.29298e+06	0.662501	10.4722
25	Tx303	H	1	1	169.59	126.462	130.848	170.52	116	16	2.48726e+06	0.745693	10.6575
25	Tx303	H	1	2	149.854	149.123	142.544	184.833	194	19	3.05138e+06	0.995122	9.72805
25	Tx303	H	1	3	147.661	133.772	133.041	175.477	105	19	2.39881e+06	0.90594	9.23563
25	Tx303	H	1	4	178.924	144.896	144.896	187.748	160	20	3.41442e+06	0.809819	9.3874
25	Tx303	H	1	5	161.55	123.538	133.041	161.71	104	21	2.25331e+06	0.764704	7.70048
11	HP301	H	2	1	131.357	114.526	113.428	147.083	29	14	1.56254e+06	0.871868	10.5059
11	HP301	H	2	2	125.523	117.819	110.135	147.608	26	NA	1.58533e+06	0.938625	NA
11	HP301	H	2	3	116.356	96.231	99.89	122.368	11	11	978224	0.827039	11.1244
11	HP301	H	2	4	135.382	106.476	111.233	136.665	63	16	1.39841e+06	0.786486	8.54156
11	HP301	H	2	5	130.26	94.402	103.549	124.055	75	12	1.06951e+06	0.72472	10.3379
11	HP301	H	2	6	141.603	127.333	111.965	159.744	104	NA	2.08363e+06	0.899225	NA
11	HP301	H	2	7	157.336	125.503	124.04	160.811	94	NA	2.25508e+06	0.797675	NA
11	HP301	H	2	8	144.164	135.016	117.819	166.901	96	NA	2.39065e+06	0.936544	NA
12	Il14H	H	3	1	178	170	149	210	144	23	4.68762e+06	0.955056	9.13043
12	Il14H	H	3	2	189	186	152	222	109	22	5.97841e+06	0.984127	10.0909
12	Il14H	H	3	3	164	142	137	179	97	22	2.99902e+06	0.865854	8.13636
12	Il14H	H	3	4	209	182	173	239	117	25	6.27848e+06	0.870813	9.56
12	Il14H	H	3	5	179.748	145.719	152.58	189.345	64	23	3.46898e+06	0.810685	8.23239
12	Il14H	H	3	6	171.789	107.025	138.584	154.243	7	18	1.88221e+06	0.623003	8.56906
12	Il14H	H	3	7	178.65	131.724	154.226	176.179	52	20	2.84766e+06	0.73733	8.80895
13	Ki3	H	4	1	151.316	129.386	122.807	164.997	58	17	2.29749e+06	0.855072	9.70571
13	Ki3	H	4	2	174.259	175.082	141.237	211.842	147	NA	4.89792e+06	1.00472	NA
13	Ki3	H	4	3	161.55	157.164	130.848	190.258	130	20	3.64337e+06	0.972851	9.5129
13	Ki3	H	4	4	152.047	128.655	120.614	163.387	55	14	2.28301e+06	0.846153	11.6705
13	Ki3	H	4	5	144.737	130.848	122.076	161.708	60	18	2.24943e+06	0.90404	8.98378
13	Ki3	H	4	6	148.738	111.416	121.845	147.669	12	13	1.69212e+06	0.749076	11.3592
13	Ki3	H	4	7	142.726	115.497	116.228	149.128	21	15	1.73062e+06	0.809222	9.94187
13	Ki3	H	4	8	149.123	127.924	125	161.755	128	19	2.21323e+06	0.857842	8.51342
18	Mo18W	H	5	1	161.55	173.245	127.193	205.619	74	22	4.49813e+06	1.07239	9.34632
18	Mo18W	H	5	2	183.315	200.329	141.603	236.487	156	26	6.85311e+06	1.09281	9.09565
18	Mo18W	H	5	3	188.804	219.539	144.347	253.657	205	30	8.61352e+06	1.16279	8.45523
18	Mo18W	H	5	4	149.123	169.59	122.076	205.63	92	25	4.03485e+06	1.13725	8.2252
18	Mo18W	H	5	5	184.413	186.059	146.542	227.774	133	23	5.8573e+06	1.00893	9.90322
8	CML277	H	6	1	112.573	92.836	99.415	122.781	31	11	880938	0.824674	11.1619
8	CML277	H	6	2	122.576	113.428	100.989	142.168	104	17	1.43337e+06	0.925369	8.36282
8	CML277	H	6	3	127.193	109.649	107.456	142.002	61	16	1.38687e+06	0.862068	8.87513
8	CML277	H	6	4	135.965	126.462	115.497	156.821	132	15	1.97702e+06	0.930107	10.4547
8	CML277	H	6	5	135.234	117.69	116.959	148.069	86	16	1.69875e+06	0.870269	9.25431
21	NC358	H	7	1	146.359	99.342	122.576	135.551	27	15	1.34899e+06	0.678756	9.03673
21	NC358	H	7	2	171.241	120.472	130.626	158.067	127	NA	2.30277e+06	0.703523	NA
21	NC358	H	7	3	159.989	107.849	127.333	150.958	89	16	1.74089e+06	0.674103	9.43487
21	NC358	H	7	4	152.031	96.597	121.021	134.973	70	NA	1.34872e+06	0.635377	NA
21	NC358	H	7	5	176.18	118.826	131.998	158.093	119	14	2.32687e+06	0.674458	11.2924
21	NC358	H	7	6	142.701	102.635	117.453	132.821	26	14	1.38684e+06	0.719231	9.48721
21	NC358	H	7	7	166.301	128.979	131.723	166.851	70	17	2.52423e+06	0.775576	9.81476
21	NC358	H	7	8	141.328	102.634	114.435	135.562	21	13	1.37109e+06	0.726211	10.4278
1	B73	H	8	1	167.397	152.778	133.772	190.202	55	24	3.54834e+06	0.912669	7.92508
1	B73	H	8	2	148.738	155.873	121.295	186.597	16	21	3.33712e+06	1.04797	8.88557
1	B73	H	8	3	168.128	212.719	138.158	245.062	91	28	7.40112e+06	1.26522	8.75221
1	B73	H	8	4	154.971	201.754	120.614	231.986	71	25	6.20272e+06	1.30188	9.27944
1	B73	H	8	5	148.392	174.707	127.193	203.431	13	20	4.30283e+06	1.17733	10.1715
1	B73	H	8	6	160.088	198.83	128.655	228.612	55	24	6.11676e+06	1.242	9.5255
1	B73	H	8	7	157.895	193.713	125	222.621	65	21	5.70256e+06	1.22685	10.601
26	Tzi8	H	9	1	156.433	133.772	125.731	170.012	61	18	2.53894e+06	0.855139	9.44511
26	Tzi8	H	9	2	156.25	138.889	129.386	180.309	57	18	2.7344e+06	0.88889	10.0172
26	Tzi8	H	9	3	160.819	114.766	128.655	154.054	60	15	1.95707e+06	0.713635	10.2703
26	Tzi8	H	9	4	150.585	115.497	126.462	153.499	30	17	1.83517e+06	0.766989	9.02935
26	Tzi8	H	9	5	151.316	125	125	161.198	47	18	2.14658e+06	0.826086	8.95544
26	Tzi8	H	9	6	138.158	99.415	114.766	134.875	27	14	1.25965e+06	0.719575	9.63393
26	Tzi8	H	9	7	158.626	130.117	127.924	172.672	85	17	2.43916e+06	0.820275	10.1572
26	Tzi8	H	9	8	141.082	126.462	118.421	157.897	19	14	2.04743e+06	0.896372	11.2784
14	Ki11	H	10	1	127.607	96.875	113.063	130.095	47	13	1.0955e+06	0.759167	10.0073
14	Ki11	H	10	2	134.742	107.025	114.984	134.532	84	16	1.40493e+06	0.794296	8.40825
14	Ki11	H	10	3	149.561	117.179	134.742	150.956	49	15	1.87177e+06	0.783486	10.0637
14	Ki11	H	10	4	142.975	107.849	65.587	145.467	35	13	1.52258e+06	0.754321	11.1898
14	Ki11	H	10	5	150.659	108.672	128.156	144.907	39	14	1.64062e+06	0.721311	10.3505
14	Ki11	H	10	6	142.426	118.551	132.547	156.972	57	NA	1.81677e+06	0.832369	NA
14	Ki11	H	10	7	145.993	97.146	121.021	133.357	3	14	1.29314e+06	0.665415	9.5255
14	Ki11	H	10	8	143.615	107.574	127.607	144.844	61	12	1.52311e+06	0.749044	12.0703
14	Ki11	H	10	9	142.7	104.83	124.314	138.85	84	15	1.44148e+06	0.734618	9.25667
14	Ki11	H	10	10	150.11	142.151	135.017	177.794	151	21	2.76185e+06	0.946979	8.46638
23	Oh43	H	11	1	165.205	133.041	138.889	176.517	77	19	2.65888e+06	0.805309	9.29037
23	Oh43	H	11	2	146.199	116.228	124.269	154.07	26	16	1.79768e+06	0.794999	9.62937
23	Oh43	H	11	3	162.281	128.655	134.503	168.294	65	20	2.44553e+06	0.792792	8.4147
23	Oh43	H	11	4	157.895	103.07	124.269	139.247	23	16	1.5824e+06	0.652776	8.70294
23	Oh43	H	11	5	180.022	148.738	149.286	189.942	80	21	3.61584e+06	0.826221	9.04486
23	Oh43	H	11	6	156.433	121.345	133.772	168.31	21	17	2.10165e+06	0.7757	9.90059
23	Oh43	H	11	7	165.935	138.158	134.503	190.285	124	21	2.87465e+06	0.832603	9.06119
23	Oh43	H	11	8	152.047	131.579	130.117	169.444	36	17	2.38732e+06	0.865384	9.96729
23	Oh43	H	11	9	168.859	145.468	138.889	184.833	109	20	3.24059e+06	0.861476	9.24165
2	B97	H	12	1	161.55	133.772	135.965	173.268	122	20	2.62442e+06	0.828053	8.6634
2	B97	H	12	2	163.012	109.649	124.269	150.252	103	NA	1.83446e+06	0.672644	NA
2	B97	H	12	3	135.965	95.76	114.766	131.582	33	NA	1.15496e+06	0.704299	NA
2	B97	H	12	4	148.392	95.029	119.883	133.246	137	NA	1.27108e+06	0.640392	NA
2	B97	H	12	5	127.924	92.836	111.842	127.756	46	NA	1.01553e+06	0.725712	NA
2	B97	H	12	6	130.117	99.415	104.532	132.72	64	17	1.17543e+06	0.764043	7.80706
2	B97	H	12	7	143.275	111.111	115.497	148.615	66	19	1.61393e+06	0.775509	7.82184
2	B97	H	12	8	154.971	128.655	126.462	167.192	58	21	2.32836e+06	0.830188	7.96152
2	B97	H	12	9	152.58	100.988	126.967	137.739	60	NA	1.46253e+06	0.661869	NA
2	B97	H	12	10	145.602	114.284	128.569	145.108	NA	NA	1.73298e+06	0.784907	NA
22	Oh7B	H	13	1	143.275	167.397	116.228	197.955	73	16	3.8055e+06	1.16836	12.3722
22	Oh7B	H	13	2	141.082	164.474	119.152	194.129	26	NA	3.61523e+06	1.1658	NA
22	Oh7B	H	13	3	153.509	166.666	119.883	190.828	52	18	3.96636e+06	1.08571	10.6016
22	Oh7B	H	13	4	153.509	203.216	129.386	235.748	117	21	6.27467e+06	1.32381	11.2261
22	Oh7B	H	13	5	132.456	135.383	109.769	161.921	7	19	2.232e+06	1.0221	8.52216
22	Oh7B	H	13	6	153.509	153.509	118.421	191.346	45	17	3.31465e+06	1	11.2556
22	Oh7B	H	13	7	145.468	143.275	115.497	170.55	31	16	2.73056e+06	0.984925	10.6594
22	Oh7B	H	13	8	156.433	170.321	118.421	197.36	54	NA	4.2238e+06	1.08878	NA
22	Oh7B	H	13	9	135.234	130.848	104.532	155.198	9	14	2.11272e+06	0.967567	11.0856
22	Oh7B	H	13	10	147.251	155.492	130.767	187.96	NA	NA	3.29243e+06	1.05597	NA
20	NC350	H	14	1	164.474	133.772	127.924	169.391	133	15	2.67449e+06	0.813332	11.2927
20	NC350	H	14	2	154.043	121.478	132.089	161.915	20	18	2.07061e+06	0.788598	8.99528
20	NC350	H	14	3	149.123	141.813	132.31	189.767	59	23	2.73171e+06	0.95098	8.25074
20	NC350	H	14	4	163.012	133.041	144.737	174.91	61	21	2.62128e+06	0.816142	8.32905
20	NC350	H	14	5	161.902	142.122	131.134	179.126	NA	NA	2.96602e+06	0.877827	NA
20	NC350	H	14	6	175.822	163.734	151.646	201.144	NA	NA	4.28602e+06	0.931249	NA
20	NC350	H	14	7	152.107	104.555	128.156	143.249	4	15	1.54841e+06	0.687378	9.54993
16	M37W	H	15	1	125.273	120.877	106.592	151.141	NA	NA	1.6697e+06	0.964909	NA
16	M37W	H	15	2	140.108	188.459	112.086	213.743	NA	NA	4.95747e+06	1.3451	NA
16	M37W	H	15	3	142.855	178.752	115.017	208.258	NA	NA	4.42307e+06	1.25128	NA
16	M37W	H	15	4	116.63	122.667	94.127	148.785	15	17	1.62171e+06	1.05176	8.75206
16	M37W	H	15	5	130.401	123.075	101.83	153.305	NA	NA	1.79798e+06	0.943819	NA
16	M37W	H	15	6	133.331	138.459	112.819	169.829	NA	NA	2.35642e+06	1.03846	NA
16	M37W	H	15	7	127.607	131.998	108.672	159.153	65	20	2.04827e+06	1.03441	7.95765
16	M37W	H	15	8	136.262	141.39	110.621	169.255	NA	NA	2.5109e+06	1.03763	NA
16	M37W	H	15	9	134.797	174.356	114.284	196.693	NA	NA	4.0194e+06	1.29347	NA
17	M162W	H	16	1	132.821	114.984	105.105	144.313	73	20	1.59258e+06	0.865706	7.21565
17	M162W	H	16	2	138.185	132.513	109.495	163.031	160	23	2.21202e+06	0.958954	7.0883
17	M162W	H	16	3	134.06	114.16	99.89	138.341	108	17	1.5847e+06	0.851559	8.13771
17	M162W	H	16	4	124.04	104.555	93.853	130.64	13	16	1.23018e+06	0.842914	8.165
17	M162W	H	16	5	140.871	118.551	99.067	144.359	147	19	1.79626e+06	0.841557	7.59784
17	M162W	H	16	6	116.081	99.341	95.499	127.916	51	NA	1.03898e+06	0.85579	NA
17	M162W	H	16	7	111.965	89.188	82.328	114.194	11	NA	810531	0.79657	NA
17	M162W	H	16	8	122.942	111.69	97.969	137.228	18	NA	1.39247e+06	0.908477	NA
17	M162W	H	16	9	118.551	112.514	86.718	133.938	31	16	1.36677e+06	0.949077	8.37112
9	CML322	H	17	1	131.134	112.086	116.482	148.928	NA	NA	1.49422e+06	0.854744	NA
9	CML322	H	17	2	136.262	107.691	115.017	137.92	NA	NA	1.43915e+06	0.790323	NA
9	CML322	H	17	3	119.1	85.895	104.83	115.844	6	15	810285	0.721201	7.72293
9	CML322	H	17	4	135.529	111.354	115.017	144.508	NA	NA	1.52617e+06	0.821625	NA
9	CML322	H	17	5	134.468	88.09	110.868	122.958	32	15	983409	0.6551	8.1972
9	CML322	H	17	6	149.448	145.053	131.134	181.906	NA	NA	2.87024e+06	0.970592	NA
9	CML322	H	17	7	128.156	114.435	111.416	143.807	57	NA	1.52272e+06	0.892935	NA
9	CML322	H	17	8	119.923	89.462	102.36	119.666	61	15	880145	0.745995	7.97773
3	CML52	H	18	1	115.258	128.705	99.341	155.369	47	19	1.78773e+06	1.11667	8.17732
3	CML52	H	18	2	120.198	129.802	103.458	152.054	60	17	1.88153e+06	1.0799	8.94435
3	CML52	H	18	3	115.807	128.43	97.695	154.796	56	16	1.78556e+06	1.109	9.67475
3	CML52	H	18	4	138.31	155.324	112.514	183.305	155	20	3.12889e+06	1.12301	9.16525
3	CML52	H	18	5	137.212	166.575	112.514	195.389	122	23	3.65162e+06	1.214	8.49517
3	CML52	H	18	6	131.723	153.403	102.36	178.35	115	19	2.93541e+06	1.16459	9.38684
3	CML52	H	18	7	145.719	173.985	114.984	198.152	142	23	4.2084e+06	1.19398	8.6153
3	CML52	H	18	8	128.156	149.012	105.653	176.174	105	22	2.69353e+06	1.16274	8.00791
6	CML228	H	19	1	135.529	132.599	115.017	159.392	NA	NA	2.17718e+06	0.978381	NA
6	CML228	H	19	2	117.947	90.841	95.969	112.63	NA	NA	888771	0.770185	NA
6	CML228	H	19	3	141.054	101.537	114.709	135.544	87	NA	1.34145e+06	0.719845	NA
6	CML228	H	19	4	121.295	80.681	99.616	111.364	1	14	741127	0.665163	7.95457
6	CML228	H	19	5	145.628	122.21	113.794	152.607	170	18	1.97348e+06	0.839193	8.47817
6	CML228	H	19	6	135.529	101.83	106.226	136.802	NA	NA	1.28739e+06	0.751352	NA
6	CML228	H	19	7	146.518	106.958	122.342	136.231	NA	NA	1.54236e+06	0.729999	NA
6	CML228	H	19	8	133.331	144.32	120.145	171.969	NA	NA	2.58141e+06	1.08242	NA
6	CML228	H	19	9	134.064	126.738	110.621	156.618	NA	NA	1.96043e+06	0.945354	NA
24	P39	H	20	1	169.961	209.521	142.855	258.795	NA	NA	7.1927e+06	1.23276	NA
24	P39	H	20	2	164.1	191.206	148.716	235.189	NA	NA	5.68217e+06	1.16518	NA
24	P39	H	20	3	164.833	188.276	132.599	219.779	NA	NA	5.50331e+06	1.14222	NA
24	P39	H	20	4	161.902	178.752	134.797	228.59	NA	NA	4.83054e+06	1.10408	NA
10	CML333	H	21	1	156.042	173.624	127.471	204.389	NA	NA	4.40065e+06	1.11267	NA
10	CML333	H	21	2	128.904	124.314	119.1	158.637	49	NA	1.81708e+06	0.964392	NA
10	CML333	H	21	3	147.251	146.518	122.342	174.69	NA	NA	2.89449e+06	0.995022	NA
10	CML333	H	21	4	134.797	136.994	126.005	160.442	NA	NA	2.32369e+06	1.0163	NA
10	CML333	H	21	5	136.638	149.013	118.826	183.858	147	21	2.825e+06	1.09057	8.75514
10	CML333	H	21	6	144.32	131.134	128.936	169.268	NA	NA	2.25329e+06	0.908634	NA
10	CML333	H	21	7	170.693	180.217	136.262	223.19	NA	NA	5.12667e+06	1.0558	NA
10	CML333	H	21	8	147.251	132.599	127.471	167.05	NA	NA	2.34979e+06	0.900496	NA
7	CML247	H	22	1	144.896	135.565	125.96	171.794	139	22	2.42218e+06	0.935602	7.80882
7	CML247	H	22	2	162.093	125.869	135.382	165.247	125	21	2.34282e+06	0.776523	7.8689
7	CML247	H	22	3	139.407	91.109	117.819	128.916	30	14	1.09132e+06	0.653547	9.20829
7	CML247	H	22	4	152.031	129.528	135.748	172.906	83	19	2.31354e+06	0.851984	9.10032
27	Mo17	H	23	1	173.624	115.749	137.727	150.56	NA	NA	2.18223e+06	0.666665	NA
27	Mo17	H	23	2	183.147	139.925	146.518	176.392	NA	NA	3.27757e+06	0.764004	NA
27	Mo17	H	23	3	140.657	96.702	120.877	141.216	NA	NA	1.22479e+06	0.687502	NA
27	Mo17	H	23	4	167.03	118.68	138.459	152.211	NA	NA	2.17549e+06	0.710531	NA
27	Mo17	H	23	5	159.325	106.476	132.821	143.259	41	15	1.69345e+06	0.668294	9.5506
27	Mo17	H	23	6	182.415	169.961	148.716	204.977	NA	NA	4.79157e+06	0.931727	NA
27	Mo17	H	23	7	168.496	116.482	138.459	141.771	NA	NA	2.12618e+06	0.691304	NA
27	Mo17	H	23	8	156.97	105.379	131.175	145.437	63	14	1.63236e+06	0.671332	10.3884
27	Mo17	H	23	9	155.309	97.434	126.738	141.741	NA	NA	1.40724e+06	0.627356	NA
27	Mo17	H	23	10	172.891	151.646	139.925	186.769	NA	NA	3.60602e+06	0.877119	NA
4	CML69	H	24	1	149.008	113.794	118.185	147.627	111	17	1.76373e+06	0.763677	8.68394
4	CML69	H	24	2	136.051	94.75	113.063	126.804	25	13	1.1341e+06	0.69643	9.75415
4	CML69	H	24	3	130.626	89.645	106.842	125.123	29	17	977886	0.686272	7.36018
4	CML69	H	24	4	139.041	103.458	120.746	138.312	26	NA	1.36525e+06	0.744083	NA
4	CML69	H	24	5	156.422	126.784	127.333	164.134	138	21	2.28527e+06	0.810525	7.8159
4	CML69	H	24	6	126.235	82.693	102.818	112.517	48	17	813550	0.655072	6.61865
4	CML69	H	24	7	129.528	85.62	106.842	116.379	12	NA	892750	0.661015	NA
4	CML69	H	24	8	144.896	97.695	117.087	132.873	23	12	1.29368e+06	0.674242	11.0727
4	CML69	H	24	9	148.189	119.649	125.138	153.693	47	16	1.92867e+06	0.807408	9.60581
15	Ky21	H	25	1	138.31	110.501	119.649	143.803	11	16	1.53658e+06	0.798937	8.98769
15	Ky21	H	25	2	152.214	167.581	118.185	197.55	128	NA	3.98891e+06	1.10096	NA
15	Ky21	H	25	3	160.995	155.324	128.064	192.111	109	21	3.54303e+06	0.964775	9.14814
15	Ky21	H	25	4	148.189	146.542	118.551	181.089	88	24	2.91145e+06	0.988886	7.54537
15	Ky21	H	25	5	134.285	110.135	111.965	142.66	NA	NA	1.47938e+06	0.820159	NA
15	Ky21	H	25	6	127.881	109.038	106.111	139.413	NA	NA	1.37903e+06	0.852652	NA
15	Ky21	H	25	7	132.821	114.892	115.624	147.088	NA	NA	1.59003e+06	0.865014	NA
15	Ky21	H	25	8	139.041	144.164	120.747	177.799	NA	NA	2.66327e+06	1.03685	NA
19	Ms71	H	26	1	128.569	95.603	104.943	129.683	NA	NA	1.07811e+06	0.743593	NA
19	Ms71	H	26	2	136.811	97.801	113.185	130.191	NA	NA	1.20867e+06	0.714862	NA
19	Ms71	H	26	3	157.14	153.294	122.526	181.336	NA	NA	3.37262e+06	0.975525	NA
19	Ms71	H	26	4	147.8	112.086	124.723	142.313	NA	NA	1.69884e+06	0.758363	NA
19	Ms71	H	26	5	135.163	103.295	111.537	134.055	NA	NA	1.31814e+06	0.764225	NA
19	Ms71	H	26	6	164.283	151.646	129.119	180.751	NA	NA	3.43318e+06	0.923078	NA
19	Ms71	H	26	7	132.416	115.383	111.537	142.335	NA	NA	1.59879e+06	0.871368	NA
19	Ms71	H	26	8	135.565	85.62	106.476	117.995	4	12	946559	0.631579	9.83292
5	CML103	H	27	1	127.881	134.468	114.709	165.163	103	18	2.13663e+06	1.05151	9.17572
5	CML103	H	27	2	141.877	166.575	125.412	199.284	133	NA	3.73679e+06	1.17408	NA
5	CML103	H	27	3	114.833	108.24	107.691	135.179	NA	NA	1.2245e+06	0.942586	NA
5	CML103	H	27	4	130.9	123.216	112.24	153.681	33	NA	1.80859e+06	0.941299	NA
5	CML103	H	27	5	140.657	153.844	119.229	189.59	NA	NA	3.10177e+06	1.09375	NA
5	CML103	H	27	6	142.306	148.899	126.372	185.186	NA	NA	2.91264e+06	1.04633	NA
5	CML103	H	27	7	132.416	145.053	109.888	169.778	NA	NA	2.59678e+06	1.09543	NA
5	CML103	H	27	8	137.91	140.657	117.031	173.065	NA	NA	2.50762e+06	1.01992	NA
5	CML103	H	27	9	127.471	125.273	109.888	156.601	NA	NA	1.82872e+06	0.982757	NA
5	CML103	H	27	10	135.712	137.91	114.833	160.453	NA	NA	2.37082e+06	1.0162	NA
25	Tx303	J	1	1	124.04	73.546	102.634	108.714	5	NA	652661	0.592922	NA
25	Tx303	J	1	2	130.992	84.157	113.794	116.901	37	NA	879156	0.642459	NA
25	Tx303	J	1	3	146.726	103.915	118.917	139.384	111	15	1.46605e+06	0.708225	9.29227
25	Tx303	J	1	4	132.09	73.546	105.745	109.804	2	12	712210	0.556787	9.15033
25	Tx303	J	1	5	126.967	68.79	99.89	100.431	8	11	605919	0.541794	9.13009
25	Tx303	J	1	6	134.285	75.741	114.16	116.885	4	14	763852	0.564032	8.34893
25	Tx303	J	1	7	140.871	80.498	118.186	117.961	40	13	900438	0.571431	9.07392
25	Tx303	J	1	8	151.116	113.428	125.503	150.96	145	18	1.7813e+06	0.750602	8.38667
25	Tx303	J	1	9	132.455	91.109	114.892	128.947	44	17	1.0237e+06	0.687849	7.58512
11	HP301	J	2	1	126.784	98.793	110.867	132.792	43	NA	1.12848e+06	0.779223	NA
11	HP301	J	2	2	145.628	120.015	111.6	155.332	153	18	1.90462e+06	0.82412	8.62956
11	HP301	J	2	3	125.503	98.061	109.77	131.739	72	13	1.10027e+06	0.781344	10.1338
11	HP301	J	2	4	116.722	84.523	100.622	118.543	42	13	768381	0.724139	9.11869
11	HP301	J	2	5	139.407	107.574	120.015	142.144	85	14	1.4728e+06	0.771654	10.1531
11	HP301	J	2	6	129.162	113.428	112.331	146.534	109	15	1.50722e+06	0.878184	9.76893
11	HP301	J	2	7	NA	NA	NA	NA	NA	NA	NA	NA	NA
11	HP301	J	2	8	126.235	95.134	104.648	125.733	27	14	1.04615e+06	0.753626	8.98093
11	HP301	J	2	9	123.308	118.551	105.379	147.653	75	17	1.58026e+06	0.961422	8.68547
11	HP301	J	2	10	128.43	103.549	107.574	136.645	65	13	1.25206e+06	0.806268	10.5112
12	Il14H	J	3	1	176.363	120.015	147.091	162.98	16	21	2.37104e+06	0.6805	7.76095
12	Il14H	J	3	2	160.264	107.941	129.162	145.977	3	18	1747227	0.67352	8.10983
12	Il14H	J	3	3	186.242	164.654	156.239	206.93	109	22	4.58009e+06	0.884086	9.40591
12	Il14H	J	3	4	179.291	114.892	144.53	156.435	72	19	2.24441e+06	0.640813	8.23342
12	Il14H	J	3	5	170.143	107.208	133.919	149.298	2	15	1.86393e+06	0.630105	9.9532
12	Il14H	J	3	6	184.047	132.089	148.189	177.823	1	22	2.96375e+06	0.717692	8.08286
12	Il14H	J	3	7	171.972	130.26	142.334	170.111	74	19	2.67008e+06	0.757449	8.95321
12	Il14H	J	3	8	185.876	164.288	149.652	208.038	112	NA	4.55076e+06	0.883858	NA
13	Ki3	J	4	1	134.285	85.254	110.135	118.019	7	12	928157	0.634874	9.83492
13	Ki3	J	4	2	139.773	105.379	117.819	138.846	7	13	1.42118e+06	0.75393	10.6805
13	Ki3	J	4	3	129.528	69.887	99.89	104.264	3	13	639177	0.539551	8.02031
13	Ki3	J	4	4	139.041	104.647	117.82	135.027	80	12	1.3945e+06	0.752634	11.2523
13	Ki3	J	4	5	136.115	98.793	114.16	130.031	70	12	1.22365e+06	0.725805	10.8359
13	Ki3	J	4	6	110.502	69.521	86.718	95.495	14	10	509294	0.629138	9.5495
13	Ki3	J	4	7	123.674	96.231	109.769	125.688	67	9	1.0446e+06	0.778102	13.9653
13	Ki3	J	4	8	136.846	99.89	110.502	131.202	25	11	1.25646e+06	0.729945	11.9275
18	Mo18W	J	5	1	160.263	171.423	137.578	204.747	119	22	4.36658e+06	1.06964	9.30668
18	Mo18W	J	5	2	149.286	171.24	133.187	205.275	96	19	4.1278e+06	1.14706	10.8039
18	Mo18W	J	5	3	156.239	142.334	134.651	180.541	9	18	2.87423e+06	0.911002	10.0301
18	Mo18W	J	5	4	153.677	129.894	127.698	166.34	21	16	2.3522e+06	0.84524	10.3963
18	Mo18W	J	5	5	154.043	154.043	133.553	190.996	83	17	3.34936e+06	1	11.2351
18	Mo18W	J	5	6	177.095	208.196	152.58	244.257	168	26	7.2893e+06	1.17562	9.3945
18	Mo18W	J	5	7	156.971	123.674	128.064	160.817	11	15	2.18713e+06	0.787878	10.7211
18	Mo18W	J	5	8	151.482	148.189	131.723	186.626	15	19	3.03927e+06	0.978261	9.82242
18	Mo18W	J	5	9	163.557	169.411	142.334	207.471	125	NA	4.32546e+06	1.03579	NA
18	Mo18W	J	5	10	162.459	148.921	134.285	183.32	104	18	3.27277e+06	0.916668	10.1844
8	CML277	J	6	1	109.769	98.793	97.33	123.489	114	18	972327	0.900008	6.8605
8	CML277	J	6	2	110.502	76.839	96.597	107.075	52	14	605996	0.695363	7.64821
8	CML277	J	6	3	112.697	65.496	93.67	97.711	12	11	473772	0.581169	8.88282
8	CML277	J	6	4	103.915	64.033	85.254	91.626	7	11	409002	0.616206	8.32964
8	CML277	J	6	5	112.331	85.62	95.5	110.322	91	16	752905	0.762212	6.89513
8	CML277	J	6	6	112.697	81.595	97.695	113.615	70	14	691395	0.724021	8.11536
21	NC358	J	7	1	129.894	110.867	102.086	138.351	88	17	1.4481e+06	0.853519	8.13829
21	NC358	J	7	2	111.142	75.467	91.84	101.542	14	13	591123	0.679014	7.81092
21	NC358	J	7	3	151.848	112.331	122.576	148.725	93	15	1.75929e+06	0.739759	9.915
21	NC358	J	7	4	133.919	81.961	103.915	113.077	6	12	865517	0.612019	9.42308
21	NC358	J	7	5	164.654	123.308	130.626	163.032	92	19	2.29447e+06	0.748892	8.58063
21	NC358	J	7	6	143.067	89.279	115.99	122.929	33	12	1.09021e+06	0.624036	10.2441
21	NC358	J	7	7	130.26	88.913	100.623	121.343	15	11	960483	0.682581	11.0312
21	NC358	J	7	8	125.503	96.231	104.281	125.699	63	14	1.06183e+06	0.766763	8.9785
1	B73	J	8	1	135.382	147.457	110.502	176.774	23	19	2.7401e+06	1.08919	9.30389
1	B73	J	8	2	130.626	170.874	110.501	196.497	32	21	3.75729e+06	1.30812	9.357
1	B73	J	8	3	135.748	137.578	105.379	166.886	5	19	2.35905e+06	1.01348	8.78347
1	B73	J	8	4	129.528	154.043	109.038	182.229	13	25	2.92883e+06	1.18926	7.28916
1	B73	J	8	5	130.992	160.995	107.574	187.723	14	22	3.26975e+06	1.22904	8.53286
1	B73	J	8	6	131.175	151.482	105.928	182.226	24	21	2.84362e+06	1.15481	8.67743
1	B73	J	8	7	135.748	155.141	110.136	182.761	17	19	3.07781e+06	1.14286	9.619
1	B73	J	8	8	126.601	155.507	102.452	185.495	27	19	2.94779e+06	1.22832	9.76289
1	B73	J	8	9	132.455	165.02	111.233	195.924	23	22	3.48985e+06	1.24586	8.90564
1	B73	J	8	10	132.455	171.606	111.965	203.064	36	21	3.82834e+06	1.29558	9.66971
26	Tzi8	J	9	1	146.725	114.526	118.917	150.367	6	16	1.75474e+06	0.780549	9.39794
26	Tzi8	J	9	2	141.054	120.746	116.356	150.371	68	13	1.86517e+06	0.856027	11.567
26	Tzi8	J	9	3	153.677	142.7	122.576	178.385	153	18	2.84492e+06	0.928571	9.91028
26	Tzi8	J	9	4	144.53	114.892	118.552	147.124	86	15	1.73655e+06	0.794935	9.80827
26	Tzi8	J	9	5	145.262	132.455	117.087	163.543	123	NA	2.31432e+06	0.911835	NA
26	Tzi8	J	9	6	137.578	96.231	111.599	127.338	9	14	1.18187e+06	0.699465	9.09557
26	Tzi8	J	9	7	136.48	123.674	124.405	163.579	44	17	1.89509e+06	0.906169	9.62229
14	Ki11	J	10	1	128.43	88.547	112.697	125.667	33	14	937056	0.689457	8.97621
14	Ki11	J	10	2	123.308	92.572	110.502	124.06	58	15	968113	0.750738	8.27067
14	Ki11	J	10	3	130.26	85.986	114.526	125.146	26	11	905816	0.660111	11.3769
14	Ki11	J	10	4	130.26	89.645	110.867	121.874	48	NA	974525	0.688201	NA
14	Ki11	J	10	5	120.381	98.061	111.234	135.029	58	15	1.05178e+06	0.814589	9.00193
14	Ki11	J	10	6	145.993	118.917	125.869	158.607	156	21	1.87583e+06	0.814539	7.55271
14	Ki11	J	10	7	121.844	89.279	101.354	119.072	12	13	893099	0.732732	9.15938
14	Ki11	J	10	8	132.089	85.62	110.867	120.744	22	14	915278	0.648199	8.62457
23	Oh43	J	11	1	145.262	110.867	119.283	146.008	37	19	1.6322e+06	0.763221	7.68463
23	Oh43	J	11	2	145.628	98.793	121.113	133.949	4	15	1.32763e+06	0.678393	8.92993
23	Oh43	J	11	3	127.698	92.938	105.745	125.687	9	13	1.01546e+06	0.727795	9.66823
23	Oh43	J	11	4	135.016	88.547	111.233	123.475	18	NA	997388	0.655826	NA
23	Oh43	J	11	5	155.507	119.649	130.26	156.411	93	17	2.0331e+06	0.769412	9.20065
23	Oh43	J	11	6	149.652	107.574	125.503	149.268	48	17	1.5979e+06	0.718828	8.78047
23	Oh43	J	11	7	152.214	109.769	120.747	146.018	68	18	1.69126e+06	0.721149	8.11211
2	B97	J	12	1	108.672	49.762	84.157	78.493	18	NA	295297	0.45791	NA
2	B97	J	12	2	143.067	100.988	110.135	136.08	118	17	1.351e+06	0.705879	8.00471
2	B97	J	12	3	126.235	81.961	103.184	114.172	17	15	801176	0.649273	7.61147
2	B97	J	12	4	135.749	83.791	105.379	115.273	21	14	914388	0.617249	8.23379
2	B97	J	12	5	145.628	113.794	110.135	147.133	125	18	1.71923e+06	0.781402	8.17406
2	B97	J	12	6	115.99	56.348	92.939	87.808	1	10	391377	0.485801	8.7808
2	B97	J	12	7	133.187	118.917	110.135	152.026	134	18	1.70888e+06	0.892857	8.44589
2	B97	J	12	8	133.919	82.327	103.55	116.359	7	13	871974	0.614752	8.95069
2	B97	J	12	9	121.478	62.569	94.402	96.067	2	16	490844	0.515064	6.00419
2	B97	J	12	10	141.969	107.208	111.234	140.513	94	17	1.49372e+06	0.755151	8.26547
22	Oh7B	J	13	1	137.212	135.016	108.306	164.669	99	21	2.28693e+06	0.983996	7.84138
22	Oh7B	J	13	2	130.626	110.868	109.038	146.017	13	19	1.45643e+06	0.848744	7.68511
22	Oh7B	J	13	3	145.262	162.459	117.819	194.322	130	24	3.59126e+06	1.11839	8.09675
20	NC350	J	14	1	150.384	103.549	122.211	136.663	96	19	1.50097e+06	0.688564	7.19279
20	NC350	J	14	2	135.748	110.501	112.331	142.728	65	16	1.50611e+06	0.814016	8.9205
20	NC350	J	14	3	144.896	130.26	120.746	162.975	101	17	2.23121e+06	0.89899	9.58676
20	NC350	J	14	4	145.262	120.746	125.137	154.2	73	18	1.9223e+06	0.831229	8.56667
20	NC350	J	14	5	136.115	112.331	115.99	143.24	115	17	1.55944e+06	0.825265	8.42588
20	NC350	J	14	6	136.846	127.698	117.088	161.342	145	19	2.0294e+06	0.933151	8.49168
16	M37W	J	15	1	126.235	119.649	99.89	147.13	66	15	1.6456e+06	0.947827	9.80867
16	M37W	J	15	2	121.844	130.626	99.159	155.328	75	19	1.92859e+06	1.07208	8.17516
16	M37W	J	15	3	132.272	118.917	100.257	144.338	17	NA	1.69753e+06	0.899034	NA
16	M37W	J	15	4	113.428	110.501	92.938	133.929	37	13	1.26477e+06	0.974195	10.3022
16	M37W	J	15	5	119.649	111.233	95.499	138.86	30	15	1.34594e+06	0.929661	9.25733
16	M37W	J	15	6	115.624	116.722	96.597	142.166	20	15	1.44542e+06	1.0095	9.47773
16	M37W	J	15	7	131.357	147.457	108.306	177.267	80	16	2.67793e+06	1.12257	11.0792
17	M162W	J	16	1	123.674	94.768	93.304	120.211	18	14	1.01486e+06	0.766273	8.5865
17	M162W	J	16	2	133.187	92.572	98.427	123.481	86	13	1.06023e+06	0.695053	9.49854
17	M162W	J	16	3	135.016	133.919	102.817	161.367	144	NA	2.21623e+06	0.991875	NA
17	M162W	J	16	4	126.235	100.622	93.67	127.312	59	NA	1.1631e+06	0.797101	NA
17	M162W	J	16	5	143.798	112.331	102.086	141.066	114	NA	1.65431e+06	0.781172	NA
17	M162W	J	16	6	129.162	107.574	97.329	131.74	95	NA	1.35656e+06	0.832861	NA
17	M162W	J	16	7	145.445	122.942	105.745	152.008	142	19	1.99428e+06	0.845282	8.00042
17	M162W	J	16	8	150.384	139.407	109.404	169.025	155	15	2.65665e+06	0.927007	11.2683
17	M162W	J	16	9	129.528	108.672	96.231	137.215	21	18	1.38796e+06	0.838985	7.62306
17	M162W	J	16	10	140.139	112.331	99.158	143.227	108	NA	1.60848e+06	0.801568	NA
9	CML322	J	17	1	124.04	82.693	101.354	113.065	38	13	795711	0.666664	8.69731
9	CML322	J	17	2	118.917	79.766	95.865	109.757	20	12	708698	0.67077	9.14642
9	CML322	J	17	3	113.611	85.62	95.865	114.735	12	NA	762628	0.753624	NA
9	CML322	J	17	4	127.698	94.036	107.208	125.174	54	14	1.03757e+06	0.736394	8.941
9	CML322	J	17	5	112.697	76.839	91.475	102.636	8	14	620779	0.681819	7.33114
9	CML322	J	17	6	118.002	94.768	99.89	126.284	36	16	963842	0.803105	7.89275
9	CML322	J	17	7	115.258	111.965	100.257	138.294	97	17	1.31902e+06	0.971429	8.13494
9	CML322	J	17	8	115.258	88.913	96.963	116.882	31	13	831878	0.771426	8.99092
3	CML52	J	18	1	119.649	113.794	105.379	141.039	50	16	1.41127e+06	0.951065	8.81494
3	CML52	J	18	2	101.354	107.574	85.254	131.199	28	15	1.08577e+06	1.06137	8.7466
3	CML52	J	18	3	128.064	146.359	99.89	171.227	115	18	2.58417e+06	1.14286	9.51261
3	CML52	J	18	4	110.135	80.498	88.914	107.056	20	14	656558	0.730903	7.64686
3	CML52	J	18	5	104.648	93.67	88.913	117.997	20	12	833158	0.895096	9.83308
3	CML52	J	18	6	121.844	114.16	98.427	138.304	27	17	1.44456e+06	0.936936	8.13553
3	CML52	J	18	7	110.501	119.283	88.913	143.258	37	17	1.46062e+06	1.07947	8.42694
3	CML52	J	18	8	104.647	117.088	93.304	141.059	38	16	1.34403e+06	1.11889	8.81619
3	CML52	J	18	9	116.722	116.722	93.67	143.288	65	18	1.45712e+06	1	7.96044
3	CML52	J	18	10	123.674	135.748	96.963	161.933	63	18	2.12514e+06	1.09763	8.99628
6	CML228	J	19	1	121.844	105.013	104.281	134.453	139	19	1.21858e+06	0.861864	7.07647
6	CML228	J	19	2	134.651	110.135	112.331	138.875	138	18	1.48364e+06	0.817929	7.71528
6	CML228	J	19	3	124.406	91.109	106.111	120.187	32	18	949725	0.732352	6.67706
6	CML228	J	19	4	148.555	132.455	115.99	161.935	155	20	2.36465e+06	0.891623	8.09675
6	CML228	J	19	5	118.552	69.887	89.279	99.887	53	15	564447	0.589505	6.65913
6	CML228	J	19	6	138.31	98.793	121.112	140.543	45	18	1.24702e+06	0.714287	7.80794
6	CML228	J	19	7	124.405	98.793	102.452	131.186	119	17	1.1053e+06	0.794124	7.71682
6	CML228	J	19	8	137.944	109.404	118.917	142.685	130	18	1.50316e+06	0.793104	7.92694
6	CML228	J	19	9	119.283	74.277	93.67	106.454	3	13	629588	0.622696	8.18877
6	CML228	J	19	10	111.965	63.667	90.744	93.322	27	14	448555	0.568633	6.66586
24	P39	J	20	1	180.754	249.726	140.505	286.037	184	32	1.13584e+07	1.38158	8.93866
24	P39	J	20	2	146.725	154.409	122.21	182.779	9	22	3.23299e+06	1.05237	8.30814
24	P39	J	20	3	153.677	174.168	130.26	209.12	29	30	4.3816e+06	1.13334	6.97067
24	P39	J	20	4	144.53	167.947	120.381	200.333	12	24	3.85804e+06	1.16202	8.34721
24	P39	J	20	5	147.823	186.242	123.674	221.241	110	28	4.98061e+06	1.2599	7.90146
24	P39	J	20	6	149.652	158.434	118.918	188.269	2	NA	3.47569e+06	1.05868	NA
24	P39	J	20	7	159.898	165.02	123.674	200.316	117	21	4.00977e+06	1.03203	9.53886
24	P39	J	20	8	154.043	177.827	123.674	209.103	42	25	4.60143e+06	1.1544	8.36412
24	P39	J	20	9	151.482	141.603	126.601	176.179	4	NA	2.76268e+06	0.934784	NA
24	P39	J	20	10	156.97	182.217	134.651	216.259	82	28	4.93097e+06	1.16084	7.72354
10	CML333	J	21	1	144.53	161.362	132.822	200.875	194	29	3.52356e+06	1.11646	6.92672
10	CML333	J	21	2	132.455	130.626	117.454	161.949	62	22	2.06701e+06	0.986192	7.36132
10	CML333	J	21	3	135.748	114.892	121.478	152.57	67	17	1.6255e+06	0.846362	8.97471
10	CML333	J	21	4	126.601	131.723	118.917	164.126	111	19	2.02577e+06	1.04046	8.63821
10	CML333	J	21	5	136.48	124.405	124.771	161.941	75	20	1.91811e+06	0.911525	8.09705
10	CML333	J	21	6	138.675	122.942	124.04	159.722	66	20	1.90141e+06	0.886548	7.9861
10	CML333	J	21	7	132.821	123.674	118.917	158.088	66	NA	1.84724e+06	0.931133	NA
10	CML333	J	21	8	135.749	135.016	118.917	167.983	102	23	2.26576e+06	0.9946	7.30361
7	CML247	J	22	1	128.43	98.427	103.183	130.036	3	14	1.13682e+06	0.766386	9.28829
7	CML247	J	22	2	150.384	133.553	125.869	167.405	168	21	2.43335e+06	0.88808	7.97167
7	CML247	J	22	3	129.529	96.963	111.965	132.842	17	13	1.11618e+06	0.748581	10.2186
7	CML247	J	22	4	132.455	103.916	114.893	133.954	46	16	1.30349e+06	0.784538	8.37213
7	CML247	J	22	5	127.699	109.038	109.038	143.819	78	17	1.37704e+06	0.853867	8.45994
27	Mo17	J	23	1	154.775	119.283	132.455	155.332	51	21	2.01078e+06	0.770686	7.39676
27	Mo17	J	23	2	138.675	91.109	118.551	126.782	19	12	1.08403e+06	0.656997	10.5652
27	Mo17	J	23	3	155.873	104.281	137.212	148.736	33	16	1.58873e+06	0.669013	9.296
27	Mo17	J	23	4	157.702	114.16	138.675	154.172	44	19	1.89394e+06	0.723897	8.11432
27	Mo17	J	23	5	179.656	132.821	145.628	172.351	77	20	2.91036e+06	0.739307	8.61755
27	Mo17	J	23	6	167.216	110.501	136.846	151.472	55	16	1.91981e+06	0.660828	9.467
27	Mo17	J	23	7	148.189	104.647	121.844	137.735	39	15	1.50248e+06	0.706173	9.18233
27	Mo17	J	23	8	148.189	107.574	132.821	150.955	40	18	1.57949e+06	0.725924	8.38639
27	Mo17	J	23	9	164.654	117.819	137.578	159.741	32	17	2.11069e+06	0.715555	9.39653
27	Mo17	J	23	10	151.482	102.086	128.796	142.697	26	NA	1.47697e+06	0.673915	NA
4	CML69	J	24	1	123.674	61.837	97.695	95.525	11	NA	495226	0.5	NA
4	CML69	J	24	2	139.407	95.134	109.769	125.658	78	14	1.17687e+06	0.682419	8.97557
4	CML69	J	24	3	136.846	90.012	114.526	129.006	78	14	1.0438e+06	0.657761	9.21471
4	CML69	J	24	4	145.993	92.938	117.087	131.149	65	13	1.19821e+06	0.636592	10.0884
4	CML69	J	24	5	122.576	89.279	99.89	116.92	94	12	899371	0.728356	9.74333
4	CML69	J	24	6	116.356	85.62	98.427	118.012	13	15	783853	0.735845	7.86747
4	CML69	J	24	7	125.138	73.18	103.549	108.663	1	10	655218	0.584794	10.8663
15	Ky21	J	25	1	115.258	90.743	97.695	120.769	8	10	864620	0.787303	12.0769
15	Ky21	J	25	2	114.526	79.766	93.67	108.694	8	10	676589	0.696488	10.8694
15	Ky21	J	25	3	133.553	103.183	107.574	133.905	20	12	1.29793e+06	0.7726	11.1587
15	Ky21	J	25	4	131.358	105.745	104.281	138.329	22	16	1.33565e+06	0.805014	8.64556
15	Ky21	J	25	5	133.919	135.016	106.476	166.291	108	18	2.23959e+06	1.00819	9.23839
15	Ky21	J	25	6	118.917	105.379	100.988	132.803	37	15	1.19791e+06	0.886156	8.85353
15	Ky21	J	25	7	128.797	115.99	106.111	147.075	43	17	1.57267e+06	0.900564	8.65147
15	Ky21	J	25	8	125.137	104.647	101.72	135.046	19	15	1.24355e+06	0.836259	9.00307
15	Ky21	J	25	9	134.651	100.256	108.672	131.193	4	14	1.24145e+06	0.744562	9.37093
19	Ms71	J	26	1	125.137	79.766	103.183	114.737	20	NA	756248	0.637429	NA
19	Ms71	J	26	2	139.407	105.013	117.454	142.178	35	16	1.4078e+06	0.753284	8.88612
19	Ms71	J	26	3	120.015	72.082	98.793	102.618	35	14	603816	0.600608	7.32986
19	Ms71	J	26	4	115.258	70.618	93.67	98.81	25	11	552791	0.612695	8.98273
5	CML103	J	27	1	114.892	118.185	102.452	146.029	70	16	1.47698e+06	1.02866	9.12681
5	CML103	J	27	2	134.629	127.522	102.964	155.356	77	20	1.99347e+06	0.94721	7.7678
5	CML103	J	27	3	125.503	156.604	108.672	184.439	150	23	2.97963e+06	1.24781	8.01909
5	CML103	J	27	4	130.626	142.334	119.649	171.3	122	NA	2.46355e+06	1.08963	NA
5	CML103	J	27	5	118.002	125.137	99.891	153.174	112	19	1.71028e+06	1.06047	8.06179
5	CML103	J	27	6	123.674	107.94	105.745	138.848	56	18	1.30682e+06	0.872778	7.71378
5	CML103	J	27	7	128.796	142.334	109.769	172.337	117	22	2.43702e+06	1.10511	7.8335
5	CML103	J	27	8	123.308	133.919	111.599	161.347	73	NA	2.05717e+06	1.08605	NA
5	CML103	J	27	9	123.308	135.748	109.404	163.528	121	NA	2.12032e+06	1.10089	NA
5	CML103	J	27	10	136.481	167.216	119.649	196.529	148	24	3.67127e+06	1.2252	8.18871
