# Supplementary material for: Diversity of Maize Shoot Apical Meristem Architecture and Its Relationship to Plant Morphology
Source: G3 (Bethesda). 2015 Mar 5;5(5):819–27. doi: 10.1534/g3.115.017541 (PMC4426368; doi:10.1534/g3.115.017541)
Supplement: Supporting Information [file supp_g3.115.017541_TableS6.xlsx]

## Sheet: NAM founder means
Supplementary data table S6. Line means of SAM architecture traits for NAM founder inbreds
line	SAM_height	SAM_arc.length	SAM_width	SAM_midpoint.width	SAM_p1.length	SAM_cell.number	SAM_volume	SAM_height.width.ratio	SAM_cell.size
	(µm)	(µm)	(µm)	(µm)	(µm)	(cells)	(µm3)		(µm)
B73	178	208	142	117	51	21.9	4553163	1.25	9.42
B97	103	139	140	116	73.6	17.7	1477898	0.73	8.15
CML103	129	158	125	109	75.8	17.2	2000199	1.03	9.32
CML228	105	136	132	108	75.7	16	1406957	0.79	8.25
CML247	113	148	138	117	68.6	17.1	1653583	0.81	8.78
CML277	90	119	116	99	57.7	13.3	938556	0.77	9.12
CML322	101	132	126	107	44.4	14.8	1240834	0.8	8.6
CML333	134	168	138	122	83.2	19.5	2366561	0.97	8.66
CML52	131	157	121	100	68.6	18.1	2042292	1.08	8.72
CML69	94	126	133	109	62.1	14.6	1134704	0.7	8.91
HP301	109	140	130	109	74	13.5	1473615	0.83	10.15
IL14H	131	171	169	138	61.4	18.8	2900580	0.77	9.14
Ki11	102	137	137	118	51.8	14.5	1343920	0.74	9.64
Ki3	117	150	141	116	61.5	14.7	1911826	0.82	10.24
Ky21	125	157	134	112	61.5	17.6	2097852	0.93	9.22
M162W	111	138	130	101	68.7	16	1486101	0.85	8.75
M37W	133	160	127	105	40.6	16.5	2217385	1.04	8.9
Mo17	114	152	158	131	50.9	15.7	1993058	0.72	9.45
Mo18W	172	207	160	133	113.8	21.9	4599320	1.07	9.62
Ms71	101	132	134	110	43.8	13.6	1370260	0.74	9.1
NC350	121	156	146	124	64.5	17.1	2024945	0.83	9.08
NC358	110	145	148	119	69.1	16	1738307	0.75	9.11
Oh43	116	155	151	127	51.6	17	1932105	0.77	9.23
Oh7B	141	172	139	114	61.1	18	2697912	1.01	9.44
P39	179	217	159	135	44.3	23.7	4956642	1.12	8.84
Tx303	109	147	146	124	87	15.6	1749869	0.74	9.04
Tzi8	127	162	149	122	58.1	15.7	2287263	0.85	10.37
