# Supplementary material for: Diversity of Maize Shoot Apical Meristem Architecture and Its Relationship to Plant Morphology
Source: G3 (Bethesda). 2015 Mar 5;5(5):819–27. doi: 10.1534/g3.115.017541 (PMC4426368; doi:10.1534/g3.115.017541)
Supplement: Supporting Information [file supp_g3.115.017541_TableS7.xlsx]

## Sheet: NAM RILs raw
Supplementary data table S7. Raw SAM architecture data from B73 x CML277 and B73 x P39 NAM RIL populations, with parental and control inbreds
line	SAM_width	SAM_height	SAM_arc.length	SAM_midpoint.width	SAM_volume	SAM_height.width.ratio	SAM_p1.p2.difference
	(µm)	(µm)	(µm)	(µm)	(µm3)		(µm)
B73	130	170	196	112	3700662	1.31	63
B73	144	171	197	121	4010555	1.19	53
B73	140	201	226	114	5799009	1.44	68
B73	136	170	201	123	3807209	1.25	52
B73	152	198	227	125	5860812	1.3	65
B73	168	197	236	142	6186560	1.17	89
B73	139	171	202	117	3915536	1.23	69
B73	138	144	182	118	2640368	1.04	70
B73	148	191	223	124	5291285	1.29	63
B73	152	205	234	123	6370812	1.35	65
CML277	126	87	117	109	887191	0.69	57
CML277	113	71	98	97	543422	0.63	46
CML277	142	115	148	114	1706941	0.81	58
CML277	118	84	113	103	769646	0.71	50
CML277	115	92	120	100	885516	0.8	53
CML277	138	104	135	112	1366747	0.75	26
CML277	130	84	114	112	867814	0.65	53
CML277	134	99	133	116	1206126	0.74	64
CML277	121	79	108	104	712365	0.65	57
CML277	111	67	99	98	481655	0.6	68
MO007	160	102	137	127	1581062	0.64	71
MO007	141	82	114	113	928889	0.58	61
MO007	138	81	116	107	884025	0.59	57
MO032	118	102	128	98	1113376	0.86	70
MO032	129	114	141	106	1512517	0.88	94
MO032	146	158	186	111	3387816	1.08	57
MO032	139	120	151	118	1815258	0.86	68
MO032	121	98	126	104	1056258	0.81	54
Mo17	136	90	124	112	1035405	0.66	80
Mo17	145	95	126	115	1233287	0.66	57
Mo17	134	85	117	111	920915	0.63	66
Mo17	155	85	125	135	1123495	0.55	95
Mo17	132	94	128	112	1078076	0.71	88
Mo17	154	110	154	132	1721366	0.71	64
Mo17	132	91	124	114	1017225	0.69	62
MO262	150	170	200	123	4074511	1.13	74
MO262	161	199	229	129	6151918	1.24	89
MO262	146	209	243	122	6529592	1.43	63
MO262	120	132	162	105	1950701	1.1	85
MO262	129	110	142	109	1415748	0.85	73
MO272	165	156	201	145	3655628	0.95	66
MO272	178	167	208	150	4555245	0.94	83
MO272	146	130	168	128	2238545	0.89	63
MO272	169	166	203	143	4256928	0.98	68
MO272	163	126	166	136	2362029	0.77	65
MO275	167	168	205	133	4322642	1.01	58
MO275	184	149	193	148	3713023	0.81	74
MO275	157	133	177	136	2519228	0.85	88
MO275	157	135	172	124	2594999	0.86	61
MO311	131	133	160	110	2128138	1.02	93
MO311	133	125	152	108	1890959	0.94	67
MO311	141	151	177	119	2981617	1.07	72
MO311	148	153	182	119	3191364	1.03	62
MO322	178	139	176	139	3154937	0.78	52
MO322	165	158	182	129	3754448	0.96	74
MO322	180	175	214	150	5032762	0.97	60
MO322	164	114	157	136	1979805	0.7	57
MO325	170	143	180	137	3154016	0.84	68
MO325	160	95	134	128	1403963	0.59	64
MO325	151	99	135	125	1394485	0.66	82
MO325	129	75	108	105	711011	0.58	108
MO325	146	100	140	131	1360675	0.68	61
MO357	132	143	168	106	2509571	1.08	56
MO357	144	161	194	116	3496146	1.12	60
MO357	138	174	205	111	4059597	1.26	34
MO357	155	188	218	122	5252842	1.21	61
MO369	164	175	214	140	4654514	1.07	60
MO369	156	152	184	130	3291398	0.97	66
P39	178	183	221	152	5489243	1.02	76
P39	171	182	220	147	5246437	1.06	85
P39	175	160	200	146	4068883	0.91	92
P39	160	149	186	139	3229947	0.93	101
Z5-E1	141	111	140	110	1582693	0.79	76
Z5-E10	149	147	181	125	2944813	0.99	88
Z5-E10	134	126	153	111	1935857	0.94	63
Z5-E10	155	121	153	120	2069171	0.78	93
Z5-E10	136	130	167	119	2094582	0.96	54
Z5-E10	155	151	187	131	3227346	0.97	96
Z5-E100	116	100	127	100	1052014	0.86	65
Z5-E100	155	136	166	119	2600192	0.88	69
Z5-E100	167	146	180	130	3228498	0.87	80
Z5-E100	146	120	151	119	1909270	0.82	71
Z5-E102	109	74	103	95	557433	0.68	68
Z5-E102	135	102	137	120	1285654	0.76	53
Z5-E102	128	90	122	109	960761	0.7	59
Z5-E102	148	109	144	121	1615657	0.74	72
Z5-E104	147	148	179	119	2953299	1.01	59
Z5-E104	141	115	146	117	1694161	0.82	64
Z5-E105	119	64	94	98	493163	0.54	65
Z5-E105	148	113	156	134	1727488	0.76	31
Z5-E105	154	105	142	131	1584021	0.68	72
Z5-E105	146	120	155	126	1909270	0.82	62
Z5-E106	100	79	103	86	572527	0.79	57
Z5-E106	137	156	184	123	3137605	1.14	75
Z5-E106	131	141	167	109	2417975	1.08	76
Z5-E106	102	104	128	94	1013883	1.02	53
Z5-E107	145	132	165	122	2294116	0.91	93
Z5-E108	144	160	194	120	3462335	1.11	68
Z5-E108	118	102	127	98	1113376	0.86	33
Z5-E108	117	90	117	102	865512	0.77	78
Z5-E108	116	119	150	107	1511161	1.03	68
Z5-E108	121	111	141	109	1354284	0.92	71
Z5-E109	128	124	151	105	1796118	0.97	80
Z5-E109	139	138	167	120	2423106	0.99	78
Z5-E109	138	141	178	117	2522238	1.02	62
Z5-E109	143	126	159	116	2059211	0.88	96
Z5-E110	130	124	151	104	1821245	0.95	91
Z5-E110	118	82	111	96	737066	0.69	75
Z5-E110	126	95	122	96	1041196	0.75	58
Z5-E110	138	132	159	111	2191429	0.96	68
Z5-E111	147	116	154	120	1816410	0.79	59
Z5-E111	152	134	171	126	2475602	0.88	74
Z5-E111	165	131	166	126	2577647	0.79	94
Z5-E111	167	146	180	128	3228498	0.87	91
Z5-E112	109	85	109	91	718135	0.78	52
Z5-E112	117	95	121	94	959607	0.81	57
Z5-E112	114	93	118	100	895787	0.82	80
Z5-E112	108	67	94	91	464368	0.62	31
Z5-E113	126	110	140	110	1382703	0.87	61
Z5-E113	127	115	141	107	1524719	0.91	65
Z5-E113	132	115	148	112	1583202	0.87	86
Z5-E113	155	133	167	126	2486637	0.86	68
Z5-E114	126	71	105	106	629927	0.56	55
Z5-E114	176	152	184	148	3661009	0.86	45
Z5-E114	134	105	141	111	1346517	0.78	71
Z5-E114	120	92	123	105	927967	0.77	60
Z5-E114	144	122	154	116	1944221	0.85	79
Z5-E115	121	86	114	99	827495	0.71	NA
Z5-E115	145	138	168	116	2515450	0.95	65
Z5-E115	138	108	140	116	1467267	0.78	38
Z5-E115	126	110	144	110	1382703	0.87	51
Z5-E116	125	123	149	104	1729065	0.98	74
Z5-E116	142	125	155	113	2012450	0.88	80
Z5-E116	116	92	122	94	893862	0.79	50
Z5-E116	113	76	101	90	610939	0.67	65
Z5-E117	138	112	146	116	1573216	0.81	94
Z5-E117	147	109	146	121	1603030	0.74	98
Z5-E117	136	104	133	114	1344366	0.76	64
Z5-E118	144	106	137	116	1484930	0.74	74
Z5-E118	153	123	161	125	2105047	0.8	62
Z5-E118	153	119	151	127	1976276	0.78	68
Z5-E118	123	73	102	98	637392	0.59	52
Z5-E118	135	115	152	122	1619375	0.85	57
Z5-E119	150	108	142	110	1617748	0.72	71
Z5-E119	163	120	159	126	2167034	0.74	62
Z5-E119	149	120	154	130	1950975	0.81	57
Z5-E119	161	110	156	134	1816615	0.68	85
Z5-E12	138	99	133	120	1248424	0.72	36
Z5-E12	162	150	188	132	3313042	0.93	68
Z5-E121	133	122	151	113	1798242	0.92	53
Z5-E121	142	122	155	121	1916817	0.86	37
Z5-E121	136	113	144	117	1576258	0.83	32
Z5-E121	127	103	134	109	1224535	0.81	68
Z5-E122	129	104	132	105	1268607	0.81	76
Z5-E122	124	82	111	99	783823	0.66	78
Z5-E122	113	92	114	91	869042	0.81	52
Z5-E123	127	119	150	112	1629901	0.93	64
Z5-E123	123	121	149	103	1646464	0.98	98
Z5-E123	143	113	144	118	1662922	0.79	55
Z5-E123	143	143	175	115	2679442	1	76
Z5-E124	119	116	149	109	1475392	0.98	57
Z5-E124	125	108	141	110	1322262	0.86	54
Z5-E124	129	108	142	113	1365352	0.84	56
Z5-E124	119	96	123	100	997103	0.81	46
Z5-E126	122	130	159	104	1920743	1.06	68
Z5-E126	138	136	170	118	2334172	0.99	77
Z5-E126	124	111	142	106	1386322	0.9	51
Z5-E126	125	141	168	110	2332926	1.13	64
Z5-E127	152	143	180	120	2812028	0.94	57
Z5-E127	128	116	148	106	1559491	0.91	84
Z5-E127	147	137	170	120	2508914	0.93	65
Z5-E127	117	110	141	102	1288231	0.94	69
Z5-E127	115	86	112	96	779674	0.75	56
Z5-E128	116	102	130	100	1094630	0.88	56
Z5-E128	130	116	144	104	1587129	0.89	92
Z5-E128	118	94	124	107	948879	0.8	59
Z5-E129	153	152	188	130	3220201	0.99	79
Z5-E129	132	125	160	114	1877951	0.95	68
Z5-E129	121	103	130	103	1164349	0.85	73
Z5-E129	136	119	154	120	1746686	0.88	69
Z5-E13	143	136	170	118	2409209	0.95	77
Z5-E13	159	140	177	125	2826648	0.88	73
Z5-E13	139	105	137	112	1402800	0.76	78
Z5-E130	124	117	142	111	1545064	0.94	83
Z5-E130	134	106	140	115	1371052	0.79	45
Z5-E130	135	105	142	121	1357609	0.78	62
Z5-E130	159	128	170	131	2368826	0.81	74
Z5-E130	129	97	129	113	1111759	0.75	66
Z5-E131	128	94	128	109	1039686	0.73	40
Z5-E131	130	105	128	105	1302974	0.81	52
Z5-E131	143	104	139	125	1424128	0.73	75
Z5-E131	132	92	127	113	1037219	0.7	68
Z5-E133	144	161	195	126	3525965	1.12	97
Z5-E133	178	188	226	148	5818285	1.06	83
Z5-E133	160	172	203	138	4393434	1.08	64
Z5-E133	146	156	196	138	3293637	1.07	46
Z5-E133	149	175	212	134	4331863	1.17	77
Z5-E134	135	122	150	103	1823921	0.9	69
Z5-E134	133	139	169	115	2371742	1.05	54
Z5-E134	115	94	119	99	923076	0.82	41
Z5-E135	127	122	147	98	1723503	0.96	50
Z5-E135	104	80	108	92	607877	0.77	42
Z5-E135	110	80	116	97	648215	0.73	63
Z5-E135	100	82	118	94	610708	0.82	47
Z5-E135	133	123	152	105	1828760	0.92	67
Z5-E136	122	83	114	105	784516	0.68	82
Z5-E136	117	69	101	97	542927	0.59	46
Z5-E136	124	110	142	111	1361104	0.89	57
Z5-E136	144	127	162	119	2106691	0.88	58
Z5-E137	115	124	147	94	1642292	1.08	47
Z5-E137	131	148	175	114	2694784	1.13	77
Z5-E137	124	146	173	106	2511077	1.18	55
Z5-E137	114	120	147	100	1517199	1.05	64
Z5-E138	141	131	164	115	2191246	0.93	80
Z5-E138	134	127	161	121	1968045	0.95	59
Z5-E138	119	119	152	112	1544106	1	40
Z5-E138	128	109	139	115	1379378	0.85	71
Z5-E139	110	66	98	94	464142	0.6	70
Z5-E139	121	66	95	92	530000	0.55	98
Z5-E140	141	143	170	116	2647546	1.01	87
Z5-E140	153	149	177	114	3101747	0.97	67
Z5-E140	159	186	221	130	5215854	1.17	84
Z5-E140	143	120	151	112	1868414	0.84	68
Z5-E141	133	103	137	116	1287634	0.77	55
Z5-E141	131	99	128	113	1175218	0.76	66
Z5-E141	132	90	126	112	997518	0.68	66
Z5-E142	125	120	147	100	1651114	0.96	74
Z5-E142	113	90	119	104	832997	0.8	53
Z5-E142	128	116	147	108	1563624	0.91	75
Z5-E142	99	72	96	88	472549	0.73	72
Z5-E144	135	103	135	116	1309314	0.76	46
Z5-E144	157	162	188	121	3794193	1.03	74
Z5-E144	148	135	171	131	2449474	0.91	69
Z5-E145	118	92	121	100	910770	0.78	54
Z5-E145	121	109	134	101	1301973	0.9	54
Z5-E145	126	102	133	105	1191564	0.81	35
Z5-E145	128	119	147	109	1647990	0.93	71
Z5-E146	150	81	124	131	993955	0.54	65
Z5-E146	155	89	130	137	1208799	0.57	49
Z5-E146	147	97	134	126	1300999	0.66	55
Z5-E147	144	105	144	124	1461146	0.73	82
Z5-E147	144	103	136	120	1410879	0.72	71
Z5-E147	146	96	133	126	1266840	0.66	63
Z5-E148	133	109	141	120	1435238	0.82	66
Z5-E148	140	112	145	117	1597670	0.8	72
Z5-E148	136	111	145	116	1522322	0.82	86
Z5-E148	147	134	166	119	2396933	0.91	85
Z5-E148	135	98	130	114	1194186	0.73	60
Z5-E149	112	108	137	98	1196088	0.97	80
Z5-E149	128	119	146	101	1647990	0.93	68
Z5-E149	113	105	133	97	1132639	0.93	52
Z5-E149	103	100	122	86	940212	0.97	69
Z5-E15	120	98	132	106	1046983	0.82	36
Z5-E15	125	103	130	105	1204150	0.82	69
Z5-E15	139	105	138	115	1402800	0.76	48
Z5-E15	141	115	147	113	1694161	0.82	74
Z5-E15	150	139	176	127	2634351	0.93	57
Z5-E150	106	90	119	92	778816	0.85	64
Z5-E150	134	145	174	120	2618693	1.08	67
Z5-E150	143	110	143	117	1580242	0.77	98
Z5-E150	124	100	133	111	1127412	0.81	66
Z5-E151	131	92	126	114	1035218	0.7	82
Z5-E151	139	114	148	114	1640690	0.82	78
Z5-E154	120	71	102	95	588897	0.59	36
Z5-E154	144	102	137	114	1386233	0.71	62
Z5-E154	132	91	122	115	1017225	0.69	49
Z5-E155	132	96	131	120	1120115	0.73	48
Z5-E155	141	99	133	116	1280964	0.7	80
Z5-E155	122	91	124	109	926457	0.75	64
Z5-E156	154	137	174	131	2622271	0.89	75
Z5-E156	152	103	145	133	1506660	0.68	53
Z5-E156	164	124	163	138	2307996	0.76	81
Z5-E156	140	99	141	125	1270040	0.71	59
Z5-E156	151	115	153	122	1826029	0.76	78
Z5-E158	138	106	138	116	1416341	0.77	62
Z5-E158	127	101	132	112	1179182	0.8	51
Z5-E158	154	132	166	122	2433608	0.86	77
Z5-E158	131	114	144	114	1543992	0.87	60
Z5-E159	154	108	145	129	1665413	0.7	68
Z5-E159	139	105	140	118	1402800	0.76	84
Z5-E16	136	101	138	115	1270191	0.74	63
Z5-E16	149	141	174	127	2697043	0.95	65
Z5-E16	138	103	132	112	1342441	0.75	51
Z5-E16	142	125	161	126	2012450	0.88	55
Z5-E16	136	116	151	118	1659832	0.85	62
Z5-E160	138	116	146	114	1679036	0.84	68
Z5-E160	142	122	153	117	1916817	0.86	96
Z5-E160	126	98	127	104	1103786	0.78	43
Z5-E160	132	115	146	109	1583202	0.87	70
Z5-E162	143	132	165	115	2281370	0.92	60
Z5-E162	200	160	214	180	4657931	0.8	137
Z5-E162	153	181	213	127	4768678	1.18	46
Z5-E163	143	100	136	114	1342103	0.7	53
Z5-E163	138	85	122	116	957232	0.62	64
Z5-E163	141	109	147	125	1529065	0.77	58
Z5-E164	118	78	105	99	674974	0.66	62
Z5-E164	115	81	112	103	698930	0.7	57
Z5-E166	132	93	123	111	1068120	0.71	63
Z5-E166	133	93	132	114	1067180	0.7	62
Z5-E166	143	106	140	117	1474825	0.74	52
Z5-E166	134	100	132	108	1228728	0.75	66
Z5-E168	118	90	117	102	865516	0.76	51
Z5-E168	141	112	147	121	1610029	0.79	67
Z5-E168	123	115	148	113	1479559	0.93	53
Z5-E169	124	108	135	100	1311702	0.87	65
Z5-E169	122	57	91	95	430128	0.47	60
Z5-E169	117	61	92	93	446762	0.52	45
Z5-E169	107	62	89	88	403541	0.58	69
Z5-E170	126	121	154	114	1689624	0.97	88
Z5-E170	133	133	172	124	2155714	1	82
Z5-E170	148	185	213	120	4906538	1.25	75
Z5-E170	126	136	164	116	2164979	1.08	59
Z5-E170	154	171	203	128	4210667	1.11	78
Z5-E171	124	121	147	102	1670006	0.98	90
Z5-E171	134	111	143	118	1498783	0.83	61
Z5-E171	140	147	179	119	2794666	1.05	79
Z5-E171	139	123	156	117	1907589	0.88	80
Z5-E171	137	145	175	119	2664987	1.06	78
Z5-E172	121	91	120	105	917773	0.75	66
Z5-E172	129	109	139	110	1390379	0.84	74
Z5-E172	128	105	135	114	1281698	0.82	57
Z5-E172	114	90	119	98	841019	0.79	66
Z5-E173	123	94	123	107	991552	0.76	45
Z5-E173	148	139	173	125	2601818	0.94	61
Z5-E173	119	90	120	101	882194	0.76	57
Z5-E173	119	85	118	107	794240	0.71	36
Z5-E173	145	120	154	120	1895557	0.83	66
Z5-E174	141	115	141	114	1694161	0.82	82
Z5-E174	151	111	151	139	1709975	0.74	71
Z5-E174	130	80	112	107	799011	0.62	47
Z5-E174	148	112	146	114	1699005	0.76	80
Z5-E175	130	100	134	114	1181948	0.77	66
Z5-E175	151	129	164	123	2279059	0.85	46
Z5-E175	131	85	114	101	894379	0.65	74
Z5-E175	136	92	125	116	1075948	0.68	79
Z5-E175	143	103	137	126	1399271	0.72	75
Z5-E176	105	66	92	83	434528	0.63	63
Z5-E176	130	126	154	108	1883606	0.97	72
Z5-E176	130	104	135	113	1279184	0.8	26
Z5-E176	138	94	132	115	1137877	0.68	36
Z5-E179	100	49	77	81	252846	0.49	50
Z5-E179	125	76	110	103	696177	0.61	49
Z5-E179	134	85	116	105	920915	0.63	46
Z5-E179	139	99	131	113	1259193	0.71	60
Z5-E181	144	141	177	120	2627908	0.98	82
Z5-E181	134	110	142	119	1472552	0.82	63
Z5-E181	162	161	197	133	3844387	0.99	72
Z5-E181	122	101	129	104	1129802	0.83	60
Z5-E183	135	117	144	109	1676190	0.87	69
Z5-E183	137	95	127	115	1149124	0.69	76
Z5-E183	127	92	121	106	990433	0.72	71
Z5-E183	124	87	121	102	870109	0.7	63
Z5-E183	125	94	124	108	1011669	0.75	53
Z5-E184	132	113	142	112	1528688	0.86	47
Z5-E184	159	158	192	131	3646450	0.99	85
Z5-E184	136	163	200	135	3451499	1.2	39
Z5-E184	136	118	151	118	1717365	0.87	46
Z5-E185	139	93	130	112	1126782	0.67	60
Z5-E185	154	125	162	131	2186808	0.81	82
Z5-E185	150	118	151	126	1902904	0.79	66
Z5-E186	143	108	141	122	1526855	0.76	71
Z5-E186	158	137	175	128	2689413	0.87	94
Z5-E186	138	98	137	123	1225705	0.71	62
Z5-E186	138	110	147	119	1519550	0.8	77
Z5-E19	109	108	133	96	1163474	0.99	60
Z5-E19	120	122	148	109	1640668	1.02	74
Z5-E19	122	146	175	110	2482869	1.2	66
Z5-E19	131	133	162	115	2128138	1.02	65
Z5-E190	135	159	186	114	3256061	1.18	74
Z5-E190	148	187	215	122	5032429	1.26	87
Z5-E190	141	162	189	117	3490866	1.15	60
Z5-E190	127	139	167	102	2286589	1.09	58
Z5-E192	117	85	110	102	778485	0.73	58
Z5-E192	114	77	103	95	632010	0.68	65
Z5-E192	115	95	118	90	942297	0.83	63
Z5-E192	138	115	141	102	1656361	0.83	47
Z5-E192	110	92	119	92	844872	0.84	55
Z5-E193	143	95	129	116	1211798	0.66	35
Z5-E193	121	108	139	104	1280529	0.89	65
Z5-E195	121	94	121	100	975346	0.78	64
Z5-E195	148	132	168	128	2339680	0.89	58
Z5-E195	119	118	143	113	1516488	0.99	37
Z5-E196	134	83	120	119	884645	0.62	52
Z5-E196	160	106	139	121	1689241	0.66	70
Z5-E196	117	66	97	99	505326	0.56	58
Z5-E196	137	76	112	116	790010	0.55	59
Z5-E197	122	115	141	106	1468494	0.94	50
Z5-E197	150	187	218	117	5055955	1.25	75
Z5-E197	145	167	194	123	3817474	1.15	88
Z5-E197	124	166	193	108	3397424	1.34	68
Z5-E198	140	86	123	120	994971	0.61	67
Z5-E198	139	97	134	119	1211153	0.69	67
Z5-E198	151	102	143	132	1468947	0.68	57
Z5-E198	139	85	123	117	966478	0.61	31
Z5-E198	135	82	118	113	875564	0.61	60
Z5-E199	149	123	159	127	2046698	0.83	46
Z5-E199	139	106	140	115	1427871	0.76	46
Z5-E199	136	111	144	113	1522322	0.82	36
Z5-E199	130	112	143	121	1478918	0.86	43
Z5-E20	145	79	119	117	910417	0.54	63
Z5-E20	126	71	107	104	630050	0.56	69
Z5-E21	137	138	167	114	2393192	1.01	64
Z5-E21	121	114	146	107	1431177	0.94	58
Z5-E210	138	128	156	108	2055320	0.93	68
Z5-E210	150	128	153	117	2229038	0.85	65
Z5-E210	145	131	160	120	2258697	0.9	70
Z5-E210	137	113	145	116	1588372	0.82	57
Z5-E211	144	126	158	131	2071391	0.87	62
Z5-E211	155	150	189	137	3182332	0.97	77
Z5-E211	140	105	148	125	1414305	0.75	68
Z5-E212	114	84	115	101	739034	0.74	56
Z5-E215	116	95	120	99	950915	0.82	58
Z5-E215	125	107	141	109	1297974	0.86	60
Z5-E215	165	104	149	146	1700864	0.63	141
Z5-E22	139	137	165	115	2383360	0.98	81
Z5-E22	121	109	137	101	1304771	0.9	82
Z5-E22	126	108	142	109	1332908	0.86	60
Z5-E22	118	135	163	111	2026420	1.14	49
Z5-E22	122	107	134	105	1266838	0.88	49
Z5-E233	126	146	174	116	2525294	1.15	69
Z5-E233	139	144	174	116	2656032	1.04	65
Z5-E233	130	117	149	115	1615085	0.9	73
Z5-E233	142	144	178	126	2703703	1.01	77
Z5-E25	132	136	166	109	2251559	1.03	76
Z5-E25	121	109	138	102	1304771	0.9	29
Z5-E25	117	102	131	100	1103963	0.87	55
Z5-E25	133	87	120	107	949132	0.65	71
Z5-E27	159	133	172	134	2552236	0.84	61
Z5-E27	141	107	140	126	1476806	0.76	58
Z5-E27	135	94	130	118	1107644	0.7	56
Z5-E27	146	96	131	113	1266840	0.66	41
Z5-E27	170	121	157	126	2300815	0.71	79
Z5-E28	129	121	148	111	1718309	0.94	78
Z5-E28	129	85	114	106	877021	0.66	65
Z5-E28	132	136	165	110	2247653	1.03	70
Z5-E28	152	100	141	135	1430890	0.66	60
Z5-E29	130	119	147	107	1672103	0.92	54
Z5-E29	127	130	160	110	1965808	1.02	72
Z5-E29	137	116	148	119	1672268	0.85	56
Z5-E29	146	140	176	125	2608661	0.96	58
Z5-E32	121	105	136	111	1209828	0.87	47
Z5-E32	162	151	187	132	3358927	0.93	71
Z5-E32	126	116	144	111	1540483	0.92	81
Z5-E33	146	138	178	121	2538477	0.95	93
Z5-E33	121	128	159	105	1834002	1.06	89
Z5-E33	141	111	143	122	1582693	0.79	67
Z5-E33	141	130	158	113	2165287	0.92	68
Z5-E33	128	118	148	110	1619498	0.92	64
Z5-E35	128	85	116	108	868443	0.66	76
Z5-E35	128	94	123	103	1039686	0.73	78
Z5-E35	124	87	124	109	870109	0.7	69
Z5-E35	131	104	138	119	1289844	0.79	49
Z5-E35	117	76	107	97	638397	0.65	79
Z5-E37	110	97	120	95	938785	0.88	48
Z5-E37	128	108	144	113	1354453	0.84	52
Z5-E37	152	139	172	117	2667320	0.91	69
Z5-E37	116	95	124	104	950915	0.82	53
Z5-E39	130	127	156	115	1905512	0.98	54
Z5-E39	160	153	185	132	3419588	0.96	86
Z5-E39	148	150	178	127	3057395	1.01	53
Z5-E39	144	185	213	128	4821684	1.28	62
Z5-E39	139	148	176	120	2820322	1.06	72
Z5-E42	111	80	103	95	661121	0.72	66
Z5-E42	123	94	122	104	993360	0.76	65
Z5-E42	115	93	124	102	904150	0.81	45
Z5-E43	127	86	118	106	877748	0.68	35
Z5-E43	127	82	115	109	808070	0.65	65
Z5-E43	133	91	123	116	1026695	0.68	74
Z5-E43	109	91	121	102	819143	0.83	51
Z5-E43	123	72	105	102	623194	0.59	55
Z5-E44	126	154	181	114	2872430	1.22	57
Z5-E44	137	117	148	119	1700958	0.85	63
Z5-E44	121	181	210	115	4145462	1.5	52
Z5-E44	116	127	152	99	1743618	1.09	67
Z5-E45	144	103	139	123	1410879	0.72	66
Z5-E45	142	111	142	120	1595029	0.78	82
Z5-E45	142	99	134	124	1291966	0.7	63
Z5-E46	138	128	157	111	2055320	0.93	63
Z5-E46	128	102	132	104	1211912	0.8	63
Z5-E46	125	104	131	98	1227112	0.83	75
Z5-E47	149	116	150	129	1828606	0.78	79
Z5-E47	166	151	196	152	3436726	0.91	81
Z5-E47	180	166	209	162	4507185	0.92	73
Z5-E47	179	145	197	157	3420712	0.81	61
Z5-E48	147	115	152	122	1767818	0.78	75
Z5-E48	153	128	160	127	2274729	0.84	78
Z5-E48	171	127	168	148	2530859	0.74	65
Z5-E48	151	115	156	130	1826029	0.76	72
Z5-E49	142	115	145	114	1706941	0.81	76
Z5-E49	127	88	120	110	914195	0.69	65
Z5-E49	146	115	144	115	1758966	0.79	75
Z5-E49	99	64	90	85	383584	0.65	63
Z5-E5	153	148	185	131	3063720	0.97	91
Z5-E5	139	123	156	117	1907589	0.88	61
Z5-E5	124	104	132	107	1216943	0.84	70
Z5-E5	140	128	158	119	2083268	0.91	68
Z5-E51	113	87	115	95	781041	0.77	46
Z5-E51	137	121	153	116	1819424	0.88	77
Z5-E51	147	131	165	129	2288740	0.89	75
Z5-E51	150	120	159	122	1965065	0.8	60
Z5-E51	132	113	142	105	1528688	0.86	80
Z5-E55	134	77	111	114	781990	0.57	64
Z5-E55	140	95	135	124	1180125	0.68	45
Z5-E55	147	94	127	111	1232560	0.64	46
Z5-E55	149	103	140	127	1470135	0.69	62
Z5-E56	116	125	152	106	1683172	1.08	64
Z5-E56	123	152	180	112	2741830	1.24	70
Z5-E56	103	100	121	92	940212	0.97	60
Z5-E56	111	114	141	100	1327316	1.03	50
Z5-E56	112	97	127	95	955697	0.87	83
Z5-E57	158	161	196	130	3763459	1.02	67
Z5-E57	130	136	164	108	2219667	1.05	87
Z5-E58	128	117	148	106	1591377	0.91	44
Z5-E58	116	103	132	100	1116418	0.89	55
Z5-E58	111	118	144	105	1431225	1.06	49
Z5-E58	121	123	155	110	1681536	1.02	63
Z5-E60	119	88	118	101	850363	0.75	65
Z5-E60	145	121	157	113	1920436	0.83	60
Z5-E60	117	147	181	120	2453443	1.26	40
Z5-E60	119	76	105	100	652484	0.64	58
Z5-E60	125	102	129	105	1181510	0.82	61
Z5-E61	130	123	156	116	1790650	0.95	74
Z5-E61	137	135	166	116	2282734	0.99	63
Z5-E61	136	110	142	114	1495879	0.81	78
Z5-E61	137	134	168	119	2247487	0.98	66
Z5-E61	131	117	148	114	1627077	0.89	57
Z5-E62	131	120	151	115	1713470	0.92	67
Z5-E62	151	131	161	126	2350061	0.87	63
Z5-E62	116	127	153	104	1743618	1.09	69
Z5-E62	135	122	155	120	1823921	0.9	62
Z5-E63	125	102	131	107	1174433	0.81	65
Z5-E63	136	116	146	106	1659832	0.85	23
Z5-E63	122	121	149	103	1634823	0.99	81
Z5-E63	111	114	141	109	1327316	1.03	35
Z5-E63	142	118	150	118	1794657	0.83	75
Z5-E66	118	83	111	97	753226	0.7	87
Z5-E68	123	122	150	107	1675594	0.99	62
Z5-E68	136	128	163	119	2027775	0.94	68
Z5-E69	135	96	133	111	1147835	0.71	85
Z5-E69	138	121	154	125	1832492	0.88	72
Z5-E69	113	85	114	99	747776	0.75	54
Z5-E69	117	80	110	104	698135	0.68	68
Z5-E69	124	95	122	109	1022543	0.77	66
Z5-E7	118	75	103	101	630978	0.64	64
Z5-E7	137	75	107	110	770890	0.54	100
Z5-E7	138	131	164	119	2156787	0.95	35
Z5-E7	150	125	160	125	2127118	0.83	64
Z5-E74	103	79	104	90	587280	0.77	61
Z5-E75	110	83	109	91	693774	0.75	40
Z5-E75	153	119	153	124	1976276	0.78	68
Z5-E75	141	85	121	110	985171	0.6	86
Z5-E79	130	104	137	109	1279184	0.8	66
Z5-E79	146	124	160	121	2036280	0.85	95
Z5-E79	152	138	172	123	2628116	0.91	76
Z5-E79	149	125	158	120	2112441	0.84	94
Z5-E79	140	110	145	111	1543568	0.79	76
Z5-E8	114	88	119	97	805333	0.77	65
Z5-E8	101	76	103	86	534297	0.75	39
Z5-E8	136	113	143	110	1576258	0.83	69
Z5-E80	114	113	138	97	1337595	0.99	72
Z5-E80	152	144	176	125	2869956	0.95	92
Z5-E80	140	111	144	109	1570445	0.79	69
Z5-E81	131	148	181	114	2694784	1.13	61
Z5-E81	132	123	156	117	1815960	0.93	46
Z5-E81	119	126	153	105	1748080	1.06	62
Z5-E81	133	136	171	118	2261806	1.02	79
Z5-E82	141	106	137	123	1451182	0.75	64
Z5-E82	143	96	138	125	1234155	0.67	77
Z5-E82	129	110	140	114	1415748	0.85	49
Z5-E83	131	120	147	108	1713470	0.92	46
Z5-E83	125	109	142	108	1346890	0.87	47
Z5-E83	146	172	205	127	4104075	1.18	86
Z5-E83	141	144	173	121	2687699	1.02	64
Z5-E84	138	118	147	111	1749666	0.85	62
Z5-E84	99	84	107	78	633641	0.85	58
Z5-E84	128	105	133	100	1281698	0.82	81
Z5-E85	133	83	116	112	875942	0.62	45
Z5-E85	150	112	149	129	1725219	0.75	68
Z5-E85	153	118	154	122	1945026	0.77	63
Z5-E85	139	114	145	114	1640690	0.82	71
Z5-E85	142	109	143	116	1541178	0.77	74
Z5-E87	143	131	165	123	2229066	0.92	63
Z5-E87	135	144	175	114	2594055	1.07	71
Z5-E87	132	92	127	116	1037219	0.7	77
Z5-E87	159	160	192	130	3733110	1.01	61
Z5-E88	130	83	114	108	850225	0.64	36
Z5-E88	137	99	134	112	1237733	0.72	61
Z5-E90	137	134	163	112	2247487	0.98	72
Z5-E90	128	118	148	110	1619498	0.92	56
Z5-E90	147	148	187	126	2953299	1.01	60
Z5-E90	135	140	170	112	2438725	1.04	75
Z5-E91	138	133	164	118	2226485	0.96	68
Z5-E91	144	113	147	117	1675658	0.78	58
Z5-E91	161	150	188	128	3294016	0.93	83
Z5-E92	114	117	140	92	1435713	1.03	59
Z5-E92	120	122	147	105	1640668	1.02	75
Z5-E92	128	137	164	103	2227811	1.07	77
Z5-E92	90	88	108	86	636733	0.98	58
Z5-E92	118	117	144	100	1478351	0.99	65
Z5-E93	137	113	148	119	1588372	0.82	33
Z5-E93	165	108	147	133	1814235	0.65	86
Z5-E93	138	99	140	124	1248424	0.72	46
Z5-E93	130	92	123	110	1018288	0.71	68
Z5-E93	139	120	156	118	1815258	0.86	74
Z5-E94	145	93	128	122	1189014	0.64	83
Z5-E94	155	97	139	132	1393029	0.63	74
Z5-E94	154	115	154	133	1867351	0.75	73
Z5-E94	156	102	144	136	1530432	0.65	42
Z5-E95	109	86	112	99	734284	0.79	59
Z5-E95	137	115	143	104	1643942	0.84	63
Z5-E95	122	94	122	99	984316	0.77	74
Z5-E96	118	120	149	93	1569094	1.02	75
Z5-E96	121	117	144	105	1511294	0.97	67
Z5-E96	175	193	239	151	6085273	1.1	85
Z5-E96	138	133	159	103	2226485	0.96	85
Z5-E96	124	109	137	107	1336232	0.88	72
Z5-E97	144	81	121	115	937845	0.56	65
Z5-E99	131	109	141	117	1412637	0.83	44
Z5-E99	151	117	154	132	1886211	0.77	44
Z5-E99	156	136	175	142	2616802	0.87	102
Z5-E99	117	102	129	107	1103963	0.87	44
B73	166	221	253	130	8017436	1.33	64
B73	133	170	201	122	3773603	1.28	57
B73	152	154	194	128	3315969	1.02	69
B73	132	166	192	116	3530929	1.26	54
B73	144	172	205	121	4086185	1.2	92
B73	146	181	216	125	4590359	1.24	62
B73	147	180	209	118	4580417	1.23	72
B73	171	208	239	137	7060831	1.22	90
B73	132	157	191	113	3099778	1.19	62
CML277	116	104	136	108	1132614	0.9	60
CML277	131	94	123	111	1068368	0.72	66
CML277	141	108	138	111	1488230	0.77	71
CML277	126	79	109	104	750007	0.63	41
CML277	124	81	114	105	768350	0.66	54
MO007	147	103	138	121	1440469	0.7	62
MO007	148	102	139	125	1419589	0.69	59
MO007	152	108	139	125	1630899	0.71	96
MO007	159	116	159	128	1985658	0.73	32
MO032	121	118	145	105	1538482	0.98	76
MO032	128	117	140	106	1591377	0.91	70
MO032	131	124	158	111	1833422	0.95	42
MO032	130	111	141	108	1452564	0.85	92
MO032	122	93	122	100	970865	0.77	53
Mo17	136	115	157	127	1627551	0.84	58
Mo17	161	121	164	134	2169769	0.75	61
Mo17	143	92	130	119	1146507	0.64	49
Mo17	135	92	129	124	1066158	0.68	44
Mo17	146	91	133	117	1148748	0.62	74
Mo17	176	146	187	146	3403352	0.83	85
Mo17	138	104	137	116	1359754	0.75	98
Mo17	152	102	147	130	1479392	0.67	32
Mo17	167	118	157	133	2135933	0.7	88
MO262	135	152	178	114	2924214	1.13	74
MO262	149	167	196	116	3894597	1.12	69
MO262	144	153	183	122	3121187	1.06	63
MO262	135	146	174	115	2670324	1.09	74
MO272	158	150	182	132	3226601	0.95	57
MO272	165	160	194	134	3855255	0.97	86
MO272	152	139	181	136	2657542	0.92	91
MO272	159	144	183	136	3015783	0.91	71
MO272	180	161	207	154	4247918	0.9	70
MO275	127	98	133	111	1118475	0.77	58
MO275	155	136	176	132	2593120	0.87	83
MO275	169	137	175	139	2897149	0.81	85
MO275	121	98	127	107	1060725	0.81	81
MO311	139	143	170	114	2606303	1.03	80
MO311	121	93	119	98	955864	0.77	65
MO311	145	143	174	115	2724646	0.99	74
MO311	151	141	172	119	2735809	0.93	91
MO311	147	144	176	119	2796670	0.99	93
MO322	170	147	186	132	3319096	0.86	77
MO322	170	125	162	131	2423776	0.73	58
MO322	175	164	198	141	4266747	0.93	67
MO322	188	164	206	154	4592160	0.87	86
MO325	168	139	176	138	2946796	0.83	71
MO325	176	137	171	138	3030092	0.78	57
MO325	153	111	153	127	1752989	0.73	13
MO357	117	144	169	94	2332472	1.23	64
MO357	167	186	219	130	5428888	1.11	57
MO357	131	152	176	107	2871901	1.16	57
MO357	125	160	187	102	3120486	1.28	57
MO369	134	126	159	117	1927932	0.94	83
MO369	135	150	186	113	2840685	1.11	53
MO369	142	138	171	117	2478480	0.98	68
MO369	148	139	170	121	2594773	0.94	74
P39	170	201	238	155	6523826	1.18	67
P39	159	170	213	152	4248245	1.07	59
P39	186	199	240	162	6802836	1.07	81
P39	166	196	236	144	6062680	1.18	75
P39	141	141	175	131	2568583	1	41
P39	154	150	192	139	3156136	0.98	71
P39	153	166	195	132	3906143	1.09	76
P39	175	195	234	150	6253351	1.12	94
P39	155	151	186	133	3235598	0.97	71
P39	171	172	215	147	4672244	1.01	75
Z24-E1	143	99	131	113	1303046	0.69	69
Z24-E1	130	116	144	110	1587129	0.89	59
Z24-E1	116	64	92	91	477627	0.55	85
Z24-E10	154	172	206	125	4285404	1.12	49
Z24-E10	171	206	237	138	6931339	1.21	80
Z24-E10	181	214	259	157	7905532	1.18	66
Z24-E10	170	159	193	138	3887469	0.94	70
Z24-E100	160	175	219	142	4539594	1.09	63
Z24-E100	137	142	178	125	2545833	1.04	63
Z24-E100	125	133	166	111	2065688	1.07	69
Z24-E100	141	144	175	120	2707048	1.02	69
Z24-E101	177	222	261	148	8507975	1.25	88
Z24-E101	147	155	193	128	3265118	1.05	64
Z24-E101	150	146	180	131	2907466	0.97	68
Z24-E101	150	153	186	124	3245315	1.02	49
Z24-E101	170	174	211	141	4743270	1.02	79
Z24-E102	162	192	224	129	5698490	1.19	71
Z24-E102	162	170	207	133	4324456	1.05	52
Z24-E102	161	198	231	132	6108572	1.23	70
Z24-E102	162	192	227	142	5698490	1.19	60
Z24-E102	169	189	225	142	5651964	1.12	89
Z24-E103	153	183	216	135	4887559	1.19	55
Z24-E103	176	223	260	148	8519104	1.27	80
Z24-E103	139	155	186	127	3127702	1.11	51
Z24-E103	161	157	194	136	3609282	0.97	88
Z24-E107	168	204	243	133	6728970	1.22	82
Z24-E107	150	191	221	125	5304743	1.27	57
Z24-E107	126	129	157	107	1933760	1.02	67
Z24-E108	196	199	244	158	7156176	1.02	80
Z24-E108	196	189	230	160	6386191	0.96	83
Z24-E108	185	139	183	154	3296878	0.75	82
Z24-E108	188	169	216	158	4876284	0.9	98
Z24-E108	182	178	219	151	5292216	0.98	76
Z24-E11	148	160	199	128	3532919	1.09	78
Z24-E11	146	147	181	129	2869811	1.01	67
Z24-E11	137	143	178	125	2580789	1.04	54
Z24-E11	152	149	180	125	3077998	0.98	106
Z24-E11	149	134	175	131	2433586	0.9	58
Z24-E110	152	132	163	125	2401884	0.87	71
Z24-E110	144	122	156	120	1939723	0.85	87
Z24-E110	151	129	162	125	2261834	0.85	84
Z24-E111	150	214	253	139	7047666	1.42	107
Z24-E111	176	229	267	150	9073497	1.3	88
Z24-E111	151	171	204	131	4167932	1.13	66
Z24-E111	158	202	244	130	6292523	1.28	71
Z24-E111	152	175	206	128	4363708	1.15	71
Z24-E112	160	171	206	136	4320932	1.07	95
Z24-E112	154	193	232	135	5576467	1.26	90
Z24-E112	144	199	242	127	5741693	1.38	68
Z24-E112	143	158	193	136	3347174	1.1	60
Z24-E113	151	167	197	126	3931161	1.11	65
Z24-E113	158	136	170	126	2660308	0.86	58
Z24-E115	174	177	213	142	4999199	1.02	132
Z24-E115	172	108	150	129	1918047	0.63	105
Z24-E115	148	120	148	119	1924200	0.81	77
Z24-E116	164	223	262	150	8163387	1.36	77
Z24-E116	189	181	224	166	5643797	0.96	76
Z24-E116	166	149	182	124	3333103	0.9	71
Z24-E117	149	171	203	123	4134636	1.15	71
Z24-E117	157	177	212	132	4616770	1.13	83
Z24-E117	161	216	250	134	7457259	1.34	79
Z24-E117	147	153	184	124	3151791	1.04	70
Z24-E117	145	144	174	120	2746967	0.99	69
Z24-E118	178	185	223	139	5619270	1.04	91
Z24-E119	176	210	243	145	7393247	1.19	85
Z24-E119	175	206	239	141	7097546	1.18	81
Z24-E119	167	194	229	139	5988182	1.16	81
Z24-E119	174	190	221	141	5838553	1.09	85
Z24-E120	143	157	192	130	3285770	1.1	77
Z24-E120	161	189	224	136	5458811	1.17	77
Z24-E120	158	180	216	136	4829025	1.14	83
Z24-E120	140	139	170	122	2495017	1	65
Z24-E120	159	174	206	135	4495887	1.09	83
Z24-E121	145	135	172	123	2402875	0.93	65
Z24-E121	147	129	167	128	2214792	0.88	72
Z24-E121	170	186	222	135	5483033	1.1	68
Z24-E121	150	143	177	132	2784180	0.95	85
Z24-E122	172	211	245	145	7416833	1.23	69
Z24-E122	156	209	246	139	6777455	1.34	72
Z24-E122	156	180	216	131	4780221	1.15	68
Z24-E122	163	222	261	144	8083405	1.36	71
Z24-E122	157	178	215	143	4672677	1.13	64
Z24-E123	171	264	302	157	12674963	1.55	89
Z24-E123	149	191	223	133	5328668	1.28	65
Z24-E123	179	243	286	158	10600149	1.36	58
Z24-E123	165	199	236	137	6232091	1.21	101
Z24-E123	163	226	265	143	8411538	1.39	73
Z24-E124	177	191	226	144	5962662	1.08	86
Z24-E124	170	163	197	147	4117458	0.96	59
Z24-E124	170	153	190	142	3611704	0.9	77
Z24-E124	181	208	242	144	7404567	1.15	81
Z24-E124	146	142	175	126	2698266	0.97	50
Z24-E126	123	135	163	109	2074617	1.09	46
Z24-E126	131	149	176	111	2732431	1.13	83
Z24-E126	113	110	142	98	1253466	0.98	54
Z24-E126	138	149	180	119	2868229	1.08	88
Z24-E127	161	189	227	141	5450288	1.17	90
Z24-E127	163	194	224	142	5847113	1.19	65
Z24-E127	157	177	213	138	4640134	1.13	68
Z24-E127	143	149	180	118	2949898	1.04	65
Z24-E127	132	109	144	118	1420951	0.82	57
Z24-E128	148	156	188	122	3322652	1.06	62
Z24-E128	167	170	209	131	4458561	1.02	87
Z24-E128	147	123	161	130	2020847	0.84	83
Z24-E128	141	119	154	118	1810874	0.85	79
Z24-E129	154	148	183	128	3083315	0.96	68
Z24-E129	155	160	189	125	3654193	1.03	91
Z24-E129	142	135	166	121	2343963	0.95	75
Z24-E129	131	96	126	116	1103150	0.73	85
Z24-E129	148	129	159	122	2212164	0.87	57
Z24-E13	175	197	233	134	6372820	1.13	85
Z24-E13	148	160	189	124	3520927	1.08	78
Z24-E13	146	143	176	119	2742638	0.98	72
Z24-E13	140	137	168	115	2391602	0.98	74
Z24-E130	137	127	163	118	2018201	0.93	62
Z24-E130	167	192	228	135	5821196	1.15	90
Z24-E130	149	174	213	127	4276149	1.17	58
Z24-E131	153	195	233	133	5701419	1.28	79
Z24-E131	150	199	231	127	5884577	1.33	74
Z24-E131	155	217	255	139	7386713	1.4	97
Z24-E131	173	201	243	157	6612940	1.16	69
Z24-E132	163	157	197	133	3631152	0.96	63
Z24-E132	157	132	168	134	2481971	0.84	83
Z24-E132	144	149	182	118	2935510	1.03	61
Z24-E132	177	167	206	140	4498635	0.94	85
Z24-E133	163	189	225	141	5526388	1.17	74
Z24-E133	161	145	183	142	3072231	0.9	NA
Z24-E133	171	183	225	150	5296420	1.07	76
Z24-E135	165	197	238	155	6087819	1.19	136
Z24-E135	178	163	210	161	4269507	0.91	49
Z24-E135	209	200	246	187	7662111	0.96	147
Z24-E136	155	182	216	139	4890075	1.18	79
Z24-E136	159	171	213	144	4315759	1.08	66
Z24-E136	135	154	187	123	2996454	1.14	58
Z24-E136	162	141	182	146	2926341	0.87	52
Z24-E137	132	87	118	107	949112	0.66	64
Z24-E137	146	127	158	118	2150293	0.87	74
Z24-E137	166	125	159	130	2380032	0.75	75
Z24-E137	147	136	167	124	2460359	0.92	72
Z24-E14	149	161	192	117	3607643	1.08	62
Z24-E141	163	176	211	137	4697048	1.08	63
Z24-E141	150	170	209	141	4096708	1.13	64
Z24-E141	160	150	186	136	3303001	0.94	92
Z24-E142	146	229	262	130	8191876	1.57	54
Z24-E142	134	180	206	116	4322859	1.34	54
Z24-E142	143	222	254	116	7540603	1.56	61
Z24-E142	133	239	262	113	8807779	1.79	58
Z24-E142	138	193	224	116	5235477	1.4	70
Z24-E144	164	174	214	136	4605169	1.06	62
Z24-E144	155	175	212	141	4457213	1.13	65
Z24-E144	153	151	186	130	3190819	0.99	55
Z24-E144	176	183	220	152	5468918	1.04	71
Z24-E144	175	155	197	144	3826398	0.89	55
Z24-E145	174	162	202	145	4141740	0.93	100
Z24-E147	142	155	188	114	3199865	1.09	66
Z24-E147	147	158	184	117	3405996	1.07	80
Z24-E147	140	138	171	114	2432576	0.98	70
Z24-E147	146	140	172	116	2602328	0.96	70
Z24-E147	153	180	211	122	4687212	1.17	68
Z24-E15	135	122	149	104	1822378	0.9	85
Z24-E15	143	98	133	120	1279776	0.69	33
Z24-E15	153	149	178	120	3111980	0.98	87
Z24-E152	162	136	172	129	2704533	0.84	60
Z24-E152	172	144	193	152	3228696	0.84	93
Z24-E152	176	139	182	148	3089010	0.79	78
Z24-E152	165	141	183	144	2986108	0.85	65
Z24-E157	181	195	238	150	6418121	1.08	102
Z24-E157	142	128	158	123	2111618	0.9	74
Z24-E157	146	148	180	126	2916313	1.02	68
Z24-E157	167	125	162	139	2407033	0.75	74
Z24-E157	141	138	172	121	2440917	0.98	73
Z24-E159	182	180	222	159	5396783	0.99	66
Z24-E159	169	177	214	146	4888684	1.05	109
Z24-E159	193	210	253	161	7894069	1.09	97
Z24-E159	177	182	226	153	5425634	1.03	69
Z24-E159	188	159	203	164	4304102	0.84	68
Z24-E16	134	164	194	124	3475491	1.23	43
Z24-E16	147	216	245	123	7109604	1.47	76
Z24-E16	136	164	202	127	3504133	1.21	75
Z24-E16	158	206	238	131	6623369	1.31	87
Z24-E160	153	131	166	128	2373759	0.85	68
Z24-E160	146	116	152	127	1794365	0.8	83
Z24-E160	133	113	146	116	1534236	0.84	79
Z24-E160	154	138	174	126	2672450	0.9	81
Z24-E163	144	183	215	118	4688391	1.27	69
Z24-E163	172	218	254	142	7954852	1.27	96
Z24-E163	166	237	275	139	9515560	1.42	83
Z24-E164	147	166	198	124	3788402	1.13	57
Z24-E164	148	186	214	120	4973330	1.26	75
Z24-E164	97	83	106	82	602719	0.86	69
Z24-E164	141	175	211	119	4184962	1.24	86
Z24-E164	129	120	153	110	1681262	0.93	65
Z24-E165	187	198	239	155	6751922	1.06	77
Z24-E165	176	138	185	140	3042653	0.78	63
Z24-E165	161	144	178	127	3045697	0.9	42
Z24-E165	158	133	171	133	2534253	0.84	69
Z24-E165	187	169	214	159	4848963	0.91	82
Z24-E166	159	176	208	132	4623650	1.11	65
Z24-E166	151	148	175	122	3022578	0.98	68
Z24-E166	139	127	162	123	2036121	0.91	43
Z24-E166	153	220	252	133	7559815	1.44	81
Z24-E167	178	228	266	146	9082320	1.28	80
Z24-E167	146	149	181	123	2979281	1.02	67
Z24-E167	167	165	206	142	4156057	0.98	118
Z24-E167	152	191	226	132	5354389	1.25	67
Z24-E167	154	177	208	122	4568800	1.15	79
Z24-E168	175	168	208	137	4496822	0.96	74
Z24-E168	153	157	192	129	3439656	1.03	83
Z24-E168	161	172	205	135	4406365	1.07	66
Z24-E170	148	120	158	128	1949002	0.81	60
Z24-E170	140	104	140	122	1389454	0.74	36
Z24-E170	155	115	152	125	1872475	0.74	79
Z24-E170	166	133	174	135	2695037	0.8	51
Z24-E170	162	108	146	130	1777839	0.67	65
Z24-E172	164	125	164	131	2325208	0.76	62
Z24-E172	158	137	176	137	2689413	0.87	75
Z24-E180	139	138	170	112	2424268	0.99	68
Z24-E180	149	147	180	125	2949043	0.99	77
Z24-E180	160	157	196	131	3603464	0.98	88
Z24-E180	153	137	169	127	2599132	0.89	86
Z24-E182	129	147	176	107	2623388	1.15	64
Z24-E182	135	143	175	115	2547242	1.06	70
Z24-E182	145	155	188	121	3247992	1.07	84
Z24-E182	157	171	204	122	4251034	1.09	81
Z24-E183	150	253	288	138	10685880	1.68	76
Z24-E183	160	206	239	126	6648136	1.29	66
Z24-E183	154	252	283	130	10742041	1.63	119
Z24-E183	138	175	208	121	4121731	1.27	70
Z24-E186	167	222	262	140	8210249	1.33	52
Z24-E186	172	195	231	138	6147848	1.13	70
Z24-E186	144	126	161	122	2071391	0.87	88
Z24-E186	178	140	183	136	3178613	0.79	93
Z24-E188	134	127	163	115	1981011	0.95	61
Z24-E188	145	133	167	122	2329950	0.92	60
Z24-E188	150	168	204	126	3967584	1.12	68
Z24-E188	135	110	139	113	1474393	0.82	74
Z24-E189	161	136	175	127	2707160	0.85	68
Z24-E189	140	87	124	118	1020914	0.62	76
Z24-E189	131	71	104	102	665878	0.54	44
Z24-E19	149	208	249	149	6488556	1.39	81
Z24-E19	159	189	229	141	5411311	1.19	77
Z24-E19	171	242	283	159	10228523	1.41	84
Z24-E191	152	135	171	132	2497684	0.88	70
Z24-E191	189	221	264	162	8776587	1.17	80
Z24-E191	170	178	221	138	4974069	1.05	83
Z24-E191	170	204	241	144	6731493	1.2	82
Z24-E191	170	191	224	139	5815173	1.13	83
Z24-E192	144	204	239	116	6096663	1.41	65
Z24-E193	163	192	233	142	5687928	1.18	56
Z24-E193	156	145	182	136	2981979	0.93	49
Z24-E193	169	153	193	136	3566885	0.91	76
Z24-E193	152	154	187	133	3326075	1.01	47
Z24-E195	161	169	205	136	4253051	1.05	86
Z24-E195	138	153	193	124	3026226	1.11	60
Z24-E195	148	113	149	127	1727398	0.77	51
Z24-E196	160	159	192	136	3722794	0.99	67
Z24-E196	137	115	148	114	1643942	0.84	63
Z24-E196	161	167	199	132	4144893	1.03	88
Z24-E196	165	138	174	129	2840246	0.84	88
Z24-E196	148	126	166	127	2118928	0.85	49
Z24-E199	152	167	205	133	3982096	1.1	68
Z24-E199	168	191	226	138	5773418	1.14	86
Z24-E199	152	176	209	130	4438067	1.16	75
Z24-E199	148	161	193	126	3586994	1.09	68
Z24-E199	149	131	169	128	2305657	0.88	78
Z24-E2	132	113	145	113	1514919	0.85	81
Z24-E2	165	171	204	135	4440664	1.03	66
Z24-E2	131	103	136	110	1268693	0.79	59
Z24-E2	148	118	155	124	1873504	0.8	78
Z24-E2	143	138	167	120	2495458	0.97	94
Z24-E20	157	184	217	133	5041885	1.17	81
Z24-E20	145	166	197	122	3765671	1.14	NA
Z24-E20	171	171	205	146	4564441	1	84
Z24-E20	138	146	172	116	2699371	1.06	86
Z24-E20	146	136	170	128	2463740	0.93	58
Z24-E21	115	109	133	91	1235530	0.95	49
Z24-E21	132	184	212	110	4520756	1.39	91
Z24-E21	123	145	167	104	2457720	1.18	72
Z24-E21	127	144	171	110	2475529	1.13	70
Z24-E21	127	178	199	102	4114185	1.4	77
Z24-E22	167	183	224	140	5238134	1.1	74
Z24-E22	137	110	140	114	1507671	0.8	74
Z24-E22	154	145	180	130	2946675	0.94	70
Z24-E22	185	94	137	151	1704025	0.51	58
Z24-E22	148	129	164	121	2239412	0.87	85
Z24-E23	164	183	219	133	5159679	1.12	71
Z24-E23	131	130	157	111	2026429	0.99	60
Z24-E23	165	192	223	137	5728577	1.16	71
Z24-E23	158	166	196	130	4017304	1.05	52
Z24-E23	154	182	220	135	4844198	1.18	56
Z24-E24	142	117	149	116	1759967	0.83	62
Z24-E24	148	125	155	127	2097862	0.84	70
Z24-E24	136	139	176	127	2436857	1.02	15
Z24-E24	136	127	160	119	1992762	0.93	54
Z24-E24	150	144	178	126	2852086	0.96	86
Z24-E25	174	217	262	159	7972482	1.25	82
Z24-E25	179	237	284	159	9952212	1.32	88
Z24-E25	158	201	243	144	6225422	1.27	81
Z24-E25	181	212	251	160	7704016	1.17	92
Z24-E25	187	241	284	167	10655776	1.29	72
Z24-E27	157	132	167	134	2495696	0.84	69
Z24-E27	137	113	144	114	1588372	0.82	70
Z24-E27	152	172	202	126	4239989	1.14	88
Z24-E28	161	133	165	133	2589210	0.82	59
Z24-E28	146	101	135	124	1384911	0.69	65
Z24-E29	138	172	203	118	3951529	1.24	71
Z24-E29	146	178	206	125	4442961	1.22	57
Z24-E29	149	180	215	120	4593644	1.21	100
Z24-E29	149	149	179	124	3020051	1	60
Z24-E29	142	170	199	118	3895859	1.2	93
Z24-E30	177	158	202	157	3997040	0.89	82
Z24-E30	149	131	164	132	2319195	0.88	89
Z24-E31	163	176	217	150	4676970	1.08	49
Z24-E31	177	206	247	166	7111589	1.16	80
Z24-E31	175	228	267	148	8926624	1.31	70
Z24-E31	145	119	150	118	1869580	0.82	53
Z24-E31	176	191	232	142	5986265	1.08	77
Z24-E33	152	194	231	142	5575528	1.27	45
Z24-E33	165	180	217	137	4978046	1.09	87
Z24-E33	165	155	198	149	3606079	0.94	74
Z24-E33	177	206	237	150	7101146	1.16	86
Z24-E34	156	184	220	128	5017049	1.18	59
Z24-E34	156	174	208	128	4421197	1.12	58
Z24-E34	152	143	175	127	2812028	0.94	43
Z24-E34	146	161	195	127	3556307	1.11	69
Z24-E35	160	190	224	138	5501448	1.19	70
Z24-E35	139	152	181	119	2971931	1.09	65
Z24-E35	165	192	227	141	5779884	1.16	92
Z24-E36	144	214	243	110	6840605	1.48	74
Z24-E36	150	192	225	127	5389857	1.27	55
Z24-E36	131	139	166	106	2356578	1.07	52
Z24-E37	177	189	233	154	5863707	1.07	63
Z24-E37	159	140	181	135	2826648	0.88	54
Z24-E37	155	158	200	136	3560745	1.02	57
Z24-E37	166	168	205	138	4311455	1.01	76
Z24-E37	174	162	205	146	4153884	0.93	57
Z24-E38	135	108	142	118	1438223	0.8	69
Z24-E38	148	139	172	117	2603641	0.94	81
Z24-E40	131	153	185	121	2895648	1.16	58
Z24-E40	124	111	139	105	1379735	0.9	58
Z24-E40	142	155	192	122	3174742	1.09	62
Z24-E41	164	227	269	157	8559732	1.38	70
Z24-E41	160	227	273	148	8406624	1.42	75
Z24-E41	161	201	245	148	6294567	1.25	92
Z24-E41	156	218	263	147	7507867	1.4	67
Z24-E41	144	167	208	138	3832145	1.16	52
Z24-E42	150	185	216	126	4951996	1.23	93
Z24-E42	150	217	247	138	7267643	1.45	82
Z24-E42	133	166	195	116	3538486	1.25	70
Z24-E42	150	228	260	139	8258622	1.52	61
Z24-E43	153	169	203	132	4062992	1.1	64
Z24-E43	144	121	152	116	1912890	0.84	68
Z24-E43	165	158	194	139	3729599	0.96	76
Z24-E43	142	115	145	121	1719132	0.81	77
Z24-E43	151	152	190	126	3205232	1.01	80
Z24-E44	185	227	264	151	9192297	1.23	69
Z24-E44	174	160	200	143	4067054	0.92	44
Z24-E44	170	188	224	136	5605908	1.1	72
Z24-E44	177	161	199	142	4169014	0.91	74
Z24-E45	181	214	252	153	7888818	1.19	87
Z24-E45	167	193	233	144	5873064	1.15	87
Z24-E46	167	231	269	140	8948373	1.38	100
Z24-E46	162	206	238	136	6700233	1.27	83
Z24-E46	167	243	277	149	10161412	1.45	63
Z24-E46	160	189	227	129	5424159	1.18	59
Z24-E47	135	159	189	111	3230324	1.17	81
Z24-E47	135	165	194	115	3532963	1.22	60
Z24-E47	128	147	177	112	2615249	1.15	70
Z24-E47	203	204	245	159	7730810	1	69
Z24-E48	179	234	272	154	9647681	1.31	65
Z24-E48	157	202	231	134	6238358	1.28	70
Z24-E48	161	179	216	138	4824194	1.11	65
Z24-E48	178	224	262	152	8691670	1.26	70
Z24-E49	156	161	198	133	3745591	1.04	54
Z24-E49	176	205	242	154	7004534	1.16	91
Z24-E49	173	198	236	151	6368556	1.14	96
Z24-E49	176	223	265	162	8506602	1.27	80
Z24-E49	172	205	248	154	6934169	1.19	95
Z24-E5	163	174	213	135	4568370	1.07	81
Z24-E5	173	197	234	143	6328484	1.14	84
Z24-E5	163	190	227	135	5576481	1.16	80
Z24-E50	158	148	187	129	3153006	0.94	79
Z24-E51	142	161	191	125	3459273	1.13	65
Z24-E51	153	200	230	132	6027324	1.31	67
Z24-E51	150	178	212	127	4531083	1.18	75
Z24-E51	157	190	222	138	5419333	1.21	89
Z24-E51	152	158	188	124	3508396	1.04	71
Z24-E53	191	172	216	155	5123985	0.9	75
Z24-E53	158	129	167	136	2364462	0.82	64
Z24-E53	187	161	197	146	4396753	0.86	53
Z24-E56	135	178	209	116	4245246	1.33	72
Z24-E56	132	193	215	116	5084758	1.46	60
Z24-E56	133	137	174	115	2314866	1.03	64
Z24-E56	135	171	203	113	3822262	1.27	71
Z24-E56	129	155	183	111	2948712	1.21	60
Z24-E57	173	141	188	148	3106676	0.81	65
Z24-E58	186	187	232	166	5949063	1	54
Z24-E58	145	154	187	127	3183819	1.06	59
Z24-E58	181	155	194	157	3957380	0.86	37
Z24-E59	163	178	224	147	4840930	1.09	56
Z24-E59	160	167	201	138	4110197	1.04	99
Z24-E60	132	109	139	113	1434978	0.83	46
Z24-E60	133	105	137	116	1344965	0.79	66
Z24-E61	162	158	194	139	3701233	0.98	87
Z24-E61	176	182	219	146	5397825	1.03	81
Z24-E61	168	168	204	143	4347812	1	86
Z24-E61	171	165	199	140	4228165	0.96	71
Z24-E62	147	165	198	125	3770592	1.12	93
Z24-E62	136	123	155	116	1867740	0.9	NA
Z24-E63	161	170	209	131	4283391	1.05	60
Z24-E63	144	145	172	122	2776990	1.01	65
Z24-E63	178	141	181	125	3213226	0.79	60
Z24-E63	152	101	135	110	1451678	0.67	135
Z24-E63	144	106	141	121	1484930	0.74	83
Z24-E68	152	176	217	137	4458233	1.16	67
Z24-E68	146	166	199	126	3767506	1.14	81
Z24-E69	149	175	202	123	4338312	1.18	82
Z24-E69	153	176	206	119	4461208	1.15	75
Z24-E69	144	157	188	116	3279521	1.09	80
Z24-E71	154	152	187	130	3255221	0.99	72
Z24-E71	143	148	183	120	2902829	1.03	67
Z24-E71	155	175	209	126	4444630	1.12	79
Z24-E71	150	165	197	135	3834249	1.1	73
Z24-E72	149	208	240	125	6488556	1.39	91
Z24-E72	148	200	229	124	5909121	1.35	76
Z24-E72	139	188	221	114	4892169	1.35	74
Z24-E72	132	152	175	109	2856897	1.15	48
Z24-E72	160	208	241	131	6764861	1.3	94
Z24-E73	143	146	174	117	2801361	1.02	65
Z24-E73	131	116	144	99	1607126	0.89	54
Z24-E73	140	153	181	110	3062949	1.09	75
Z24-E73	121	117	141	102	1514470	0.96	72
Z24-E74	125	164	193	109	3302086	1.31	82
Z24-E74	147	202	235	126	6029848	1.37	92
Z24-E74	141	173	203	117	4052710	1.23	113
Z24-E74	143	177	214	125	4352885	1.24	100
Z24-E74	132	183	208	112	4449224	1.39	82
Z24-E75	164	146	188	133	3168161	0.89	64
Z24-E75	159	142	176	131	2890458	0.89	57
Z24-E75	155	129	168	128	2321168	0.83	55
Z24-E75	176	163	200	134	4249448	0.93	80
Z24-E75	155	117	152	127	1939487	0.76	79
Z24-E76	183	228	270	158	9208168	1.24	69
Z24-E76	179	209	240	145	7409836	1.17	75
Z24-E76	175	153	194	141	3691178	0.87	72
Z24-E76	165	178	213	138	4858202	1.08	75
Z24-E77	159	159	202	142	3700841	1	86
Z24-E77	178	150	198	154	3633484	0.84	57
Z24-E77	177	198	235	155	6528641	1.12	58
Z24-E77	172	171	210	157	4604712	0.99	62
Z24-E77	188	198	244	160	6841350	1.05	109
Z24-E78	158	188	222	139	5322166	1.19	72
Z24-E79	175	174	209	140	4827298	0.99	82
Z24-E79	167	220	256	153	7953443	1.32	88
Z24-E8	128	142	174	119	2399993	1.11	53
Z24-E8	148	178	210	127	4484063	1.2	72
Z24-E8	160	184	219	143	5117438	1.15	67
Z24-E8	141	161	195	136	3466312	1.14	51
Z24-E80	192	172	216	169	5152401	0.89	81
Z24-E81	143	180	211	128	4512842	1.26	60
Z24-E81	159	209	245	146	6855015	1.31	100
Z24-E81	159	213	250	132	7186874	1.34	81
Z24-E81	149	157	192	141	3378494	1.05	75
Z24-E82	163	143	181	143	3005460	0.88	72
Z24-E82	150	144	173	131	2835800	0.96	67
Z24-E82	152	124	166	134	2120490	0.82	53
Z24-E82	172	178	216	144	5026661	1.03	75
Z24-E82	148	125	164	129	2108632	0.84	76
Z24-E84	160	158	191	125	3668251	0.99	55
Z24-E85	150	138	174	128	2587711	0.92	70
Z24-E85	181	189	231	154	6003920	1.05	80
Z24-E85	157	144	183	136	2976377	0.92	62
Z24-E85	128	146	171	107	2549232	1.14	97
Z24-E85	144	129	167	125	2174369	0.9	51
Z24-E86	180	174	220	167	4946962	0.96	78
Z24-E86	176	167	208	154	4491277	0.95	68
Z24-E86	161	160	202	143	3800195	0.99	52
Z24-E86	182	185	220	158	5697661	1.01	83
Z24-E86	188	188	228	162	6088494	1	44
Z24-E88	187	235	274	166	10015885	1.26	74
Z24-E88	166	163	205	146	4033201	0.98	70
Z24-E88	178	230	270	152	9186441	1.29	76
Z24-E88	155	161	195	133	3734750	1.04	75
Z24-E88	154	152	191	138	3265326	0.99	61
Z24-E89	156	150	185	133	3220892	0.96	58
Z24-E89	153	143	174	127	2845664	0.93	80
Z24-E89	155	148	181	127	3112972	0.95	62
Z24-E89	145	124	161	124	2025251	0.86	71
Z24-E89	175	191	225	137	5942881	1.09	74
Z24-E9	135	116	144	111	1653739	0.87	61
Z24-E9	139	109	145	116	1503810	0.78	55
Z24-E9	157	136	171	120	2641793	0.87	71
Z24-E90	146	113	145	119	1690310	0.77	66
Z24-E90	137	115	148	118	1641088	0.84	71
Z24-E90	162	164	200	132	3999745	1.01	83
Z24-E90	150	115	148	114	1804584	0.77	125
Z24-E90	185	160	191	124	4285947	0.86	42
Z24-E91	149	170	205	122	4034053	1.14	79
Z24-E91	146	153	186	125	3156035	1.05	79
Z24-E91	139	119	153	119	1780091	0.85	62
Z24-E92	144	174	202	126	4177258	1.21	72
Z24-E92	129	186	218	119	4584771	1.44	68
Z24-E92	148	216	259	132	7157521	1.46	55
Z24-E92	142	216	254	138	7022233	1.52	61
Z24-E93	165	164	200	133	4050470	0.99	75
Z24-E93	155	141	175	125	2798039	0.91	59
Z24-E93	154	138	171	127	2660055	0.89	64
Z24-E93	165	148	182	132	3262251	0.9	74
Z24-E93	150	152	181	123	3170572	1.01	77
Z24-E94	155	220	251	134	7632782	1.41	69
Z24-E94	155	187	219	128	5188184	1.21	77
Z24-E94	189	213	249	154	8003980	1.13	90
Z24-E94	173	179	221	147	5107773	1.03	65
Z24-E94	167	184	222	138	5286518	1.1	72
Z24-E95	133	144	174	107	2579028	1.09	69
Z24-E95	136	174	202	114	3989835	1.28	74
Z24-E95	138	150	182	120	2915263	1.09	80
Z24-E95	137	146	174	110	2704506	1.07	52
Z24-E96	150	136	174	133	2533413	0.91	56
Z24-E96	167	141	180	140	3016443	0.85	79
Z24-E96	148	110	144	116	1634840	0.74	59
Z24-E96	151	160	192	124	3577287	1.06	52
Z24-E97	165	164	197	142	4062924	0.99	80
Z24-E97	152	129	167	128	2289478	0.85	73
Z24-E97	165	157	194	140	3702394	0.95	83
Z24-E98	163	208	239	128	6879974	1.28	64
Z24-E98	153	214	244	120	7098678	1.4	71
Z24-E98	137	153	178	111	2992895	1.11	63
Z24-E98	158	128	165	139	2344922	0.81	78
Z24-E99	157	192	227	129	5566474	1.23	63
Z24-E99	160	203	238	132	6402674	1.26	76
Z24-E99	172	185	220	137	5429878	1.07	90
Z24-E99	170	180	217	133	5096447	1.06	71
Z24-E99	174	195	230	137	6238650	1.12	72
