# Supplementary material for: Diversity of Maize Shoot Apical Meristem Architecture and Its Relationship to Plant Morphology
Source: G3 (Bethesda). 2015 Mar 5;5(5):819–27. doi: 10.1534/g3.115.017541 (PMC4426368; doi:10.1534/g3.115.017541)
Supplement: Supporting Information [file supp_g3.115.017541_TableS8.xlsx]

## Sheet: all RIL means
Supplementary data table S8. Line means of SAM architecture traits for IBM RIL, B73 x CML277 RIL, and B73 x P39 RIL
line	SAM_width	SAM_height	SAM_arc.length	SAM_midpoint.width	SAM_volume	SAM_height.width.ratio
	(µm)	(µm)	(µm)	(µm)	(µm3)
B73	146.666	181.761	212.295	121.659	5.01206e+06	1.25751
CML277	125.733	89.8667	120.333	106.933	975666	0.714
MO001	150.906	140.756	174.575	124.875	2.73538e+06	0.937844
MO003	136.4	127.6	160	121	2.87858e+06	0.938
MO005	140.719	137.836	168.567	117.897	2.51722e+06	0.9873
MO007	145.865	105.43	138.665	117.96	1.52883e+06	0.718275
MO008	143.1	119.466	152.663	118.466	1.87223e+06	0.831891
MO009	149.2	122	158.2	130	2.79076e+06	0.818
MO010	133.106	119.606	151.662	112.95	1.84846e+06	0.907162
MO011	154.4	140.6	176.6	131.8	3.6004e+06	0.906
MO012	135.821	132.338	163.1	116.487	2.15807e+06	0.990025
MO013	140.333	130	163.333	123.667	2.84373e+06	0.936667
MO014	141.133	139.333	169.8	119.05	2.49732e+06	0.992622
MO015	159.835	169.229	203.181	133.061	4.34794e+06	1.06126
MO016	154.096	113.435	149.554	128.612	1.81845e+06	0.724638
MO017	135.383	126.306	158.272	116.05	2.02187e+06	0.934289
MO018	142.75	126	161.25	124.5	2.77647e+06	0.885
MO019	144	153.333	185.333	127	4.13735e+06	1.05667
MO021	145.145	127.161	158.032	117.25	2.21263e+06	0.875684
MO022	150.994	146.806	179.748	125.968	3.02761e+06	0.972071
MO023	135.241	124.938	154.786	110.972	1.93962e+06	0.931752
MO024	142.574	140.553	171.879	118.121	2.58559e+06	0.989595
MO025	144.458	158.05	190.208	123.992	3.43049e+06	1.11488
MO026	148.5	132.5	169.5	132	3.06024e+06	0.895
MO027	145.344	148.972	181.5	122.506	3.10487e+06	1.0429
MO028	148.465	131.619	167.394	126.374	2.31931e+06	0.880355
MO029	149.791	127.134	163.081	124.497	2216601	0.841337
MO030	144.3	120.728	153.49	120.452	1876317	0.83411
MO031	126.594	121.228	150.478	108.294	1.67467e+06	0.967222
MO032	124.253	117.158	144.605	103.705	1.49651e+06	0.9562
MO033	156.318	123.565	159.776	132.365	2.18318e+06	0.779553
MO034	149.2	153.507	184.847	119.1	3.2805e+06	1.0427
MO035	133.026	134.91	165.148	112.097	2.23195e+06	1.02601
MO038	143	123.333	155	118.333	2.71024e+06	0.863333
MO039	128.914	108.079	136.736	105.621	1.33848e+06	0.854071
MO040	133.6	128.036	158.77	112.588	1.99263e+06	0.965388
MO041	137.5	122.75	155	123.5	2.59672e+06	0.8925
MO042	137.75	119	150	121.75	2.48318e+06	0.8675
MO043	134.786	172.536	200.857	116.679	4.02278e+06	1.3055
MO044	137.715	121.974	152.729	112.874	1.87682e+06	0.887676
MO045	140.684	138.523	170	115.4	2.50807e+06	0.996594
MO046	138.123	118.603	152.84	119.503	1.8172e+06	0.86164
MO048	144.759	126.759	162.303	123.083	2.13169e+06	0.88571
MO051	142.463	121.319	156.906	120.756	1.90764e+06	0.849562
MO052	148.561	132.484	165.6	122.194	2.33542e+06	0.898955
MO054	152.256	144.35	176.65	124.119	2.90996e+06	0.944562
MO055	147.807	132.517	166.8	126.338	2.28868e+06	0.899338
MO056	129.4	118.4	149.4	115.2	2.46199e+06	0.912
MO057	136.573	124.324	155.616	115.405	1.89946e+06	0.920886
MO058	133.17	116.17	146.873	113.743	1.5845e+06	0.884253
MO060	144.906	133.882	164.709	120.645	2.37837e+06	0.922206
MO061	132.012	147.262	176.008	112.446	2.71681e+06	1.13392
MO062	132.647	140.44	169.767	109.9	2.4899e+06	1.07625
MO066	142.6	141.392	176.467	122.6	2.7167e+06	0.9983
MO067	145.571	115.519	149.903	121.565	1.82886e+06	0.793413
MO068	145	121.25	155.75	127	2.7391e+06	0.83
MO071	151.25	132	164.25	125.5	3.33371e+06	0.8675
MO074	148.248	161.139	195.394	126.19	3.65799e+06	1.1003
MO075	130.174	119.661	149.565	107.817	1.73693e+06	0.929878
MO076	133.189	131.87	161.274	112.056	2.283e+06	0.998607
MO077	140.338	116.375	149.794	119.269	1.72631e+06	0.833206
MO079	133.769	120.062	150.35	111.356	1.72974e+06	0.904406
MO080	143.8	121	156.8	127	2.65223e+06	0.846
MO081	129.8	122.4	151.6	112.6	2.55457e+06	0.938
MO082	133.667	101	132.667	118.667	1.94103e+06	0.756667
MO083	142.4	143	174.4	124.6	3.67753e+06	1.012
MO085	142.6	146.4	177.6	119.8	3.81021e+06	1.028
MO086	127.667	110	142	115.667	2.29902e+06	0.85
MO087	140.5	98.5	132.5	122.5	1.98303e+06	0.695
MO088	140.6	118	152.2	124	2.47791e+06	0.84
MO090	149.5	113.5	149	123	2.44273e+06	0.77
MO092	146.5	138	172	124.25	3.45931e+06	0.935
MO093	141.2	122.2	156.6	127	2.61204e+06	0.864
MO096	146	129.25	163	126.5	3.01355e+06	0.8975
MO097	140.25	122.25	154.75	127.5	2.61618e+06	0.8775
MO099	141.75	126.25	157.75	123.25	2.80394e+06	0.89
MO101	142.667	131	163	118	3.10911e+06	0.906667
MO106	133.25	120.75	150	119.5	2.53798e+06	0.9075
MO109	132.2	103.4	134.2	119.6	1.97282e+06	0.784
MO110	133.667	150	179.333	118	3.57205e+06	1.12
MO111	130.75	112.5	140.75	115.75	2.28588e+06	0.855
MO113	129	130.5	159.5	109	2.85671e+06	1.01
MO114	132.5	113.75	145.5	116.75	2.27637e+06	0.865
MO115	138	132.6	165.2	123.4	2.98883e+06	0.958
MO116	126	127	159	111	2.55831e+06	1.01
MO118	134.5	128.25	157.25	116.5	2.73189e+06	0.9525
MO120	136.75	106.75	141	120	2.19104e+06	0.785
MO121	145.5	121.25	156.25	130	2.64868e+06	0.84
MO124	147.5	131.75	167.75	128	3.03087e+06	0.8925
MO125	146.6	134.8	167.2	127.6	3.33134e+06	0.914
MO127	131.25	125	156	116.75	2.6822e+06	0.9475
MO132	145.2	137.4	170.6	125.8	3.32131e+06	0.942
MO134	136	122	156	119.25	2.56184e+06	0.8975
MO138	138.333	129.333	160	117.667	2.79173e+06	0.936667
MO141	142.667	140	170.333	123.333	3.28825e+06	0.98
MO142	140	120.25	155.5	121.75	2.66497e+06	0.8675
MO143	150	139	176.2	133.2	3.48939e+06	0.928
MO145	150.5	111.75	147.25	130.25	2.41582e+06	0.75
MO146	138.6	115.2	149.6	125.6	2.50545e+06	0.824
MO147	144.5	135.25	167.25	128	3.39354e+06	0.93
MO150	133	111	129.5	126	2.19458e+06	0.835
MO151	144.6	130.6	162.6	125.8	3.04911e+06	0.898
MO153	135.5	109.75	140.75	120.25	2.16761e+06	0.8125
MO154	144.333	118.667	155.333	123.667	2.5594e+06	0.823333
MO157	133.5	119	149.75	115.75	2.43195e+06	0.8925
MO159	146.4	130.2	162.8	125.6	3.33435e+06	0.876
MO160	138.5	118.25	151.25	121.75	2.70335e+06	0.845
MO161	150.2	140	173.6	126.8	3.61399e+06	0.924
MO165	145.333	151	184.333	126.333	4.08862e+06	1.04
MO167	132	105.333	138	114.667	2.08832e+06	0.796667
MO169	147.333	126.667	158.667	128.667	2.85722e+06	0.856667
Mo17	148.387	107.299	144.015	124.705	1.68298e+06	0.721119
MO171	154.2	148.8	181	129.2	4.36081e+06	0.95
MO172	139.25	124	156.5	121.25	2.64279e+06	0.9
MO174	140.25	143.75	175.75	122	3.74096e+06	1.0075
MO176	127	102.5	134.5	114	1.90763e+06	0.8125
MO177	137	140.2	170.6	120.4	3.42728e+06	1.02
MO178	136	132.667	163.333	115	2.98394e+06	0.98
MO181	143.667	127.667	162.333	123.667	2.88749e+06	0.89
MO182	124.667	112.333	142	112.667	2.17216e+06	0.9
MO183	128.75	113	145.75	115	2.20377e+06	0.875
MO187	132.25	129.5	161.75	120.75	2.90261e+06	0.985
MO188	144	137.25	171.25	122.75	3.42835e+06	0.94
MO189	143	121.25	155.5	127.25	2.70002e+06	0.845
MO190	130.5	105.25	136.5	116.75	2.3456e+06	0.7925
MO194	138.8	130.6	162.6	121	3.01808e+06	0.936
MO195	153.25	143.25	177.5	130.75	3.74231e+06	0.94
MO196	148.75	148.75	183.75	132.5	3.7603e+06	1.0025
MO197	153	126.75	163.25	132.5	3.18122e+06	0.8225
MO198	146	133.5	166	127	3.04611e+06	0.915
MO199	140.25	119	153	124.25	2.52456e+06	0.855
MO200	134	126.25	160	119.5	2.76416e+06	0.935
MO202	165	146	184	139.5	3.95386e+06	0.89
MO205	133.333	108.667	138.667	112.667	2.23374e+06	0.813333
MO206	132.6	116	146.6	116.8	2.36693e+06	0.872
MO209	137.6	125.4	158.2	126.4	2.82438e+06	0.908
MO210	134.333	108.333	141	118.667	2.1374e+06	0.803333
MO213	139.2	117.4	152.8	121.6	2.50413e+06	0.84
MO218	151	125.667	163	132	2.86309e+06	0.84
MO219	140.8	145.6	178	124.4	3.63066e+06	1.034
MO220	146.667	106.333	142	121	2.2757e+06	0.72
MO222	130.25	119.75	150.25	112.75	2.46459e+06	0.915
MO223	135.75	103.75	138.5	120.75	2.02442e+06	0.765
MO224	149.75	147.25	185.5	133.25	4.13175e+06	0.9675
MO228	152.5	141	174	132	3.53793e+06	0.93
MO229	148.8	152.8	187	128.4	4.24213e+06	1.028
MO230	142	121.6	155.2	122.6	2.65319e+06	0.856
MO232	140.333	118	152	122.667	2.50231e+06	0.843333
MO236	136.333	116	147.667	121.333	2.36816e+06	0.853333
MO237	150.6	136.4	169.4	130	3.26854e+06	0.908
MO238	145.333	155	185	123	4.0176e+06	1.06333
MO240	158.25	125	161.5	135	3.01116e+06	0.7925
MO241	134	130.667	159.333	113.333	2.83571e+06	0.97
MO248	147	134	167	126.5	3.38792e+06	0.91
MO250	143.667	127.333	163.333	132.333	2.89887e+06	0.883333
MO255	139	116.667	149.333	123.333	2.40891e+06	0.84
MO256	137.75	126	159.25	123	2.95317e+06	0.91
MO258	148.6	122.4	160.8	129.2	2.89979e+06	0.824
MO262	141.718	159.154	190.314	120.889	3.56189e+06	1.13132
MO263	138.5	122	155.25	119.25	2.81065e+06	0.875
MO264	142.707	124.264	159.107	123.607	2.03871e+06	0.872114
MO265	145.526	128.685	162.171	121.685	2.22872e+06	0.893024
MO266	156.575	129.086	165.639	131.319	2.38018e+06	0.820217
MO267	142.041	155.705	186.622	117.7	3.31053e+06	1.10526
MO268	149	134.75	167.5	129	3.14134e+06	0.91
MO269	130.742	140.458	168.613	108.606	2.4467e+06	1.09868
MO270	142.25	125	158.25	129.5	2.85091e+06	0.88
MO271	144.25	109.5	146	127.25	2.37775e+06	0.7525
MO272	159.408	135.425	174.067	136.014	2.69565e+06	0.845022
MO274	146.667	132	165.333	125	3.08944e+06	0.91
MO275	152.724	134.434	170.589	127.176	2.56152e+06	0.874416
MO276	151.514	133.263	168.069	126.257	2.55477e+06	0.875743
MO277	136.6	123.4	155.2	125	2.77262e+06	0.894
MO278	134.25	125.25	157.25	122.5	2.75049e+06	0.9325
MO279	147	109.5	147.5	130	2.29872e+06	0.7575
MO280	146.667	116.667	152.667	126.667	2.68031e+06	0.786667
MO281	135.234	138.566	169.494	113.884	2.44957e+06	1.05763
MO282	135.25	116.75	148.75	122.5	2.44714e+06	0.865
MO283	144.2	129	163.4	123	2.9511e+06	0.894
MO284	157.532	135.396	171.643	132.146	2.59379e+06	0.860857
MO286	147	127	163.333	129.667	2.8379e+06	0.863333
MO287	133.983	137.477	167.353	111.217	2.42874e+06	1.03387
MO288	150.508	131.82	165.488	124.908	2.38491e+06	0.869304
MO289	152.75	149.25	185.25	132	4.09398e+06	0.9775
MO292	146	132.2	167.6	130.4	3.18307e+06	0.906
MO295	140.333	153.667	188	125.333	4.01584e+06	1.10667
MO296	137.74	139.687	168.72	112.46	2.48798e+06	1.022
MO297	139.77	132.6	164.719	114.052	2.21449e+06	0.9554
MO298	147.559	146.744	178.637	120.011	2.94393e+06	1.00465
MO300	145.5	140.5	175	128	3.60699e+06	0.955
MO301	140.667	138	166.333	118.333	3.13828e+06	0.99
MO302	151	137	170	133.333	3.44949e+06	0.906667
MO303	141	127.5	158.75	123.75	2.82005e+06	0.9125
MO304	151.2	144.2	177.2	131	3.65289e+06	0.952
MO305	152.25	150.5	184.25	130.25	3.87785e+06	0.995
MO307	139	132.75	164.25	123	3.2041e+06	0.9425
MO308	130.2	137.2	166.6	115.4	3.02549e+06	1.058
MO309	141.135	127.281	157.554	115.727	2.07103e+06	0.901446
MO310	162.79	112.197	151.568	133.732	1.92681e+06	0.679219
MO311	140.613	139.131	168.556	114.469	2.59245e+06	0.997513
MO313	145.4	132.6	167	125.4	3.07067e+06	0.91
MO315	131.761	158.225	187.457	112.196	3.20121e+06	1.21944
MO317	133.269	134.312	164.55	113.737	2.18478e+06	1.02409
MO318	143	127	158.75	127.25	2.7941e+06	0.8875
MO321	133.806	124.394	157.165	114.606	1.93448e+06	0.940824
MO322	164.93	138.43	176.825	135.91	2.91486e+06	0.82961
MO323	132.877	133.071	162.387	111.335	2.18506e+06	1.01982
MO325	154.751	109.371	146.366	128.712	1.75884e+06	0.692098
MO326	152.555	152.585	185.382	126.785	3.32141e+06	1.00008
MO327	149.667	141.667	174.667	129.667	3.44136e+06	0.95
MO328	142.286	125.486	158.29	120.81	2.08446e+06	0.882731
MO329	132.5	131	161.5	118.75	2.79186e+06	0.9875
MO331	146.2	137.4	169.8	123.8	3.48119e+06	0.94
MO332	133	111	143	120.5	2.18819e+06	0.8375
MO334	131.75	168.5	198.75	119.75	4.83825e+06	1.27
MO335	142.5	143	176.5	121.75	3.39626e+06	1.0025
MO336	150	142	173.5	128.5	3.6326e+06	0.94
MO337	144.536	130.548	162.77	117.567	2.28071e+06	0.902655
MO338	151.8	160.2	194.4	131.6	4.51092e+06	1.052
MO340	155.2	123	161.4	137	2.90535e+06	0.794
MO341	140.326	122.867	155.444	118.926	1.9445e+06	0.871081
MO342	145	155.5	187.75	131	4.36736e+06	1.0625
MO344	131.583	128.343	159.32	111.383	2.01513e+06	0.9872
MO345	130.809	126.009	151.617	106.27	1.90813e+06	0.964661
MO346	136.731	151.062	181.088	113.8	2.99537e+06	1.11894
MO347	143.8	137	169.8	126	3.3123e+06	0.948
MO349	136.667	131.667	161.333	121.667	2.92879e+06	0.963333
MO351	141.25	123.25	157	123.25	2.72698e+06	0.865
MO352	134.47	134.303	164.276	111.232	2.22419e+06	1.00751
MO353	144.5	134.5	169.5	131	3.08862e+06	0.9325
MO354	128.032	126.297	157.747	109.585	1.88035e+06	1.00753
MO355	151.072	130.949	165.573	124.297	2.33806e+06	0.865503
MO356	138.75	127.75	161.75	122.75	2.84868e+06	0.9175
MO357	140	177.365	205.224	114.218	4.40862e+06	1.28949
MO358	141.5	120.75	154.75	124.75	2.68281e+06	0.8475
MO360	145.541	129.838	163.883	121.9	2.27757e+06	0.894455
MO362	146.75	122.75	158.25	123.25	2.71091e+06	0.8375
MO364	152.578	133.072	168.444	129.509	2.43267e+06	0.864569
MO365	141.896	134.773	168.246	119.365	2.3906e+06	0.972585
MO367	143.5	152.5	181.5	124.75	4.12799e+06	1.055
MO368	146.287	118.429	154.335	122.842	1843674	0.805677
MO369	153.42	153.324	186.472	126.292	3.35203e+06	0.997888
MO372	147.75	129.25	163.25	127.25	2.99427e+06	0.8775
MO373	149.5	106.5	146	135.5	2.25172e+06	0.715
MO378	134.882	126.741	156.535	109.688	2.00952e+06	0.943224
MO379	157.104	143.504	178.357	132.396	2.99269e+06	0.914786
MO380	140.667	107.667	143.667	124.333	2.19373e+06	0.76
MO381	142.4	121	155.4	127.2	2.69249e+06	0.852
MO382	150.432	131.856	165.612	122.644	2.377e+06	0.870865
MO383	133.786	116.359	146.552	113.586	1.79757e+06	0.873766
MO384	141.229	151.139	183.394	117.971	3.09109e+06	1.07832
P39	165.286	172.5	210.786	144.929	4.67601e+06	1.04214
Z24-E1	129.667	93	122.333	104.667	1.1226e+06	0.71
Z24-E10	169	187.75	223.75	139.5	5752436	1.1125
Z24-E100	140.75	148.5	184.5	124.5	2.96454e+06	1.055
Z24-E101	158.8	170	206.2	134.4	4.53383e+06	1.062
Z24-E102	163.2	188.2	222.8	135.6	5.49639e+06	1.156
Z24-E103	157.25	179.5	214	136.5	5.03591e+06	1.135
Z24-E107	148	174.667	207	121.667	4.65582e+06	1.17
Z24-E108	189.4	174.8	218.4	156.2	5401549	0.922
Z24-E11	146.4	146.6	182.6	127.6	2.89902e+06	1.004
Z24-E110	149	127.667	160.333	123.333	2201147	0.856667
Z24-E111	157.4	198.2	234.8	135.6	6.18907e+06	1.256
Z24-E112	150.25	180.25	218.25	133.5	4.74657e+06	1.2025
Z24-E113	154.5	151.5	183.5	126	3.29573e+06	0.985
Z24-E115	164.667	135	170.333	130	2.94715e+06	0.82
Z24-E116	173	184.333	222.667	146.667	5713429	1.07333
Z24-E117	151.8	172.2	204.6	126.6	4.42148e+06	1.13
Z24-E118	178	185	223	139	5619270	1.04
Z24-E119	173	200	233	141.5	6579382	1.155
Z24-E120	152.2	167.8	201.6	131.8	4112902	1.1
Z24-E121	153	148.25	184.5	129.5	3221220	0.965
Z24-E122	160.8	200	236.6	140.4	6.34612e+06	1.242
Z24-E123	165.4	224.6	262.4	145.6	8.64948e+06	1.358
Z24-E124	168.8	171.4	206	140.6	4.75893e+06	1.012
Z24-E126	126.25	135.75	165.25	109.25	2.23219e+06	1.07
Z24-E127	151.2	163.6	197.6	131.4	4.06168e+06	1.07
Z24-E128	150.75	142	178	125.25	2.90323e+06	0.9425
Z24-E129	146	133.6	164.6	122.4	2479357	0.908
Z24-E13	152.25	159.25	191.5	123	3.757e+06	1.0425
Z24-E130	151	164.333	201.333	126.667	4.03852e+06	1.08333
Z24-E131	157.75	203	240.5	139	6.39641e+06	1.2925
Z24-E132	160.25	151.25	188.25	131.25	3386817	0.9425
Z24-E133	165	172.333	211	144.333	4.63168e+06	1.04667
Z24-E135	184	186.667	231.333	167.667	6006479	1.02
Z24-E136	152.75	162	199.5	138	3.78216e+06	1.0675
Z24-E137	147.75	118.75	150.5	119.75	1984949	0.8
Z24-E14	149	161	192	117	3607643	1.08
Z24-E141	157.667	165.333	202	138	4.03225e+06	1.05
Z24-E142	138.8	212.6	241.6	118.2	6.81972e+06	1.532
Z24-E144	164.6	167.6	205.8	140.6	4.3097e+06	1.022
Z24-E145	174	162	202	145	4141740	0.93
Z24-E147	145.6	154.2	185.2	116.6	3.2656e+06	1.054
Z24-E15	143.667	123	153.333	114.667	2071378	0.856667
Z24-E152	168.75	140	182.5	143.25	3.00209e+06	0.83
Z24-E157	155.4	146.8	182	131.8	3.2588e+06	0.946
Z24-E159	181.8	181.6	223.6	156.6	5.58185e+06	1
Z24-E16	143.75	187.5	219.75	126.25	5.17815e+06	1.305
Z24-E160	146.5	124.5	159.5	124.25	2.0937e+06	0.8475
Z24-E163	160.667	212.667	248	133	7.38627e+06	1.32
Z24-E164	132.4	146	176.4	111	3046135	1.084
Z24-E165	173.8	156.4	197.4	142.8	4.0447e+06	0.898
Z24-E166	150.5	167.75	199.25	127.5	4310541	1.11
Z24-E167	159.4	182	217.4	133	5.22817e+06	1.136
Z24-E168	163	165.667	201.667	133.667	4114281	1.02
Z24-E170	154.2	116	154	128	1.93676e+06	0.752
Z24-E172	161	131	170	134	2.50731e+06	0.815
Z24-E180	150.25	144.75	178.75	123.75	2.89398e+06	0.9625
Z24-E182	141.5	154	185.75	116.25	3167414	1.0925
Z24-E183	150.5	221.5	254.5	128.75	8049447	1.4675
Z24-E186	165.25	170.75	209.25	134	4.90203e+06	1.03
Z24-E188	141	134.5	168.25	119	2.43823e+06	0.9525
Z24-E189	144	98	134.333	115.667	1.46465e+06	0.67
Z24-E19	159.667	213	253.667	149.667	7376130	1.33
Z24-E191	170.2	185.8	224.2	143	5.759e+06	1.086
Z24-E192	144	204	239	116	6096663	1.41
Z24-E193	160	161	198.75	136.75	3.89072e+06	1.0075
Z24-E195	149	145	182.333	129	3002225	0.976667
Z24-E196	154.2	141	175.8	127.6	2.89416e+06	0.91
Z24-E199	153.8	165.2	200.4	131	4.01725e+06	1.074
Z24-E2	143.8	128.6	161.4	120.4	2.31865e+06	0.888
Z24-E20	151.4	160.6	192.2	129	3.70702e+06	1.06
Z24-E21	124.8	152	176.4	103.4	2960744	1.21
Z24-E22	158.2	132.2	169	131.2	2.72718e+06	0.844
Z24-E23	154.4	170.6	203	129.2	4.35524e+06	1.1
Z24-E24	142.4	130.4	163.6	123	2.22791e+06	0.916
Z24-E25	175.8	221.6	264.8	157.8	8.50198e+06	1.26
Z24-E27	148.667	139	171	124.667	2.77469e+06	0.933333
Z24-E28	153.5	117	150	128.5	1.98706e+06	0.755
Z24-E29	144.8	169.8	200.4	121	3.98081e+06	1.174
Z24-E30	163	144.5	183	144.5	3.15812e+06	0.885
Z24-E31	167.2	184	222.6	144.8	5.71421e+06	1.09
Z24-E33	164.75	183.75	220.75	144.5	5.3152e+06	1.115
Z24-E34	152.5	165.5	199.5	127.5	3.95165e+06	1.0875
Z24-E35	154.667	178	210.667	132.667	4.75109e+06	1.14667
Z24-E36	141.667	181.667	211.333	114.333	4.86235e+06	1.27333
Z24-E37	166.2	163.4	204.8	141.8	4.14329e+06	0.982
Z24-E38	141.5	123.5	157	117.5	2020932	0.87
Z24-E40	132.333	139.667	172	116	2483375	1.05
Z24-E41	157	208	251.6	147.6	6920187	1.322
Z24-E42	145.75	199	229.5	129.75	6.00419e+06	1.3625
Z24-E43	151	143	176.8	126.8	2925969	0.944
Z24-E44	176.5	184	221.75	143	5.75857e+06	1.04
Z24-E45	174	203.5	242.5	148.5	6880941	1.17
Z24-E46	164	217.25	252.75	138.5	7.80854e+06	1.32
Z24-E47	150.25	168.75	201.25	124.25	4.27734e+06	1.135
Z24-E48	168.75	209.75	245.25	144.5	7.35048e+06	1.24
Z24-E49	170.6	198.4	237.8	150.8	6.51189e+06	1.16
Z24-E5	166.333	187	224.667	137.667	5.49111e+06	1.12333
Z24-E50	158	148	187	129	3153006	0.94
Z24-E51	150.8	177.4	208.6	129.2	4.58908e+06	1.174
Z24-E53	178.667	154	193.333	145.667	3.96173e+06	0.86
Z24-E56	132.8	166.8	196.8	114.2	3.68317e+06	1.26
Z24-E57	173	141	188	148	3106676	0.81
Z24-E58	170.667	165.333	204.333	150	4.36342e+06	0.973333
Z24-E59	161.5	172.5	212.5	142.5	4.47556e+06	1.065
Z24-E60	132.5	107	138	114.5	1.38997e+06	0.81
Z24-E61	169.25	168.25	204	142	4.41876e+06	0.9925
Z24-E62	141.5	144	176.5	120.5	2819166	1.01
Z24-E63	155.8	132.6	167.6	121.8	2642043	0.852
Z24-E68	149	171	208	131.5	4.11287e+06	1.15
Z24-E69	148.667	169.333	198.667	119.333	4026347	1.14
Z24-E71	150.5	160	194	127.75	3.60923e+06	1.06
Z24-E72	145.6	191.2	221.2	120.6	5.38232e+06	1.308
Z24-E73	133.75	133	160	107	2.24648e+06	0.99
Z24-E74	137.6	179.8	210.6	117.8	4.43735e+06	1.308
Z24-E75	161.8	139.4	176.8	130.6	2.91374e+06	0.86
Z24-E76	175.5	192	229.25	145.5	6291846	1.09
Z24-E77	174.8	175.2	217.8	153.6	5.06181e+06	1
Z24-E78	158	188	222	139	5322166	1.19
Z24-E79	171	197	232.5	146.5	6.39037e+06	1.155
Z24-E8	144.25	166.25	199.5	131.25	3.86695e+06	1.15
Z24-E80	192	172	216	169	5152401	0.89
Z24-E81	152.5	189.75	224.5	136.75	5.48331e+06	1.24
Z24-E82	157	142.8	180	136.2	3.01941e+06	0.906
Z24-E84	160	158	191	125	3668251	0.99
Z24-E85	152	149.2	185.2	130	3.25832e+06	0.986
Z24-E86	177.4	174.8	215.6	156.8	5.00492e+06	0.982
Z24-E88	168	188.2	227	147	6.04712e+06	1.112
Z24-E89	156.8	151.2	185.2	129.6	3429532	0.958
Z24-E9	143.667	120.333	153.333	115.667	1933114	0.84
Z24-E90	156	133.4	166.4	121.4	2.68433e+06	0.85
Z24-E91	144.667	147.333	181.333	122	2.99006e+06	1.01333
Z24-E92	140.75	198	233.25	128.75	5.73545e+06	1.4075
Z24-E93	157.8	148.6	181.8	128	3.18828e+06	0.94
Z24-E94	167.8	196.6	232.4	140.2	6.24385e+06	1.176
Z24-E95	136	153.5	183	112.75	3047158	1.1325
Z24-E96	154	136.75	172.5	128.25	2.6905e+06	0.89
Z24-E97	160.667	150	186	136.667	3.3516e+06	0.93
Z24-E98	152.75	175.75	206.5	124.5	4.82912e+06	1.15
Z24-E99	166.6	191	226.4	133.6	5.74682e+06	1.148
Z5-E1	141	111	140	110	1582693	0.79
Z5-E10	145.8	135	168.2	121.2	2.45435e+06	0.928
Z5-E100	146	125.5	156	117	2.19749e+06	0.8575
Z5-E102	130	93.75	126.5	111.25	1.10488e+06	0.72
Z5-E104	144	131.5	162.5	118	2323730	0.915
Z5-E105	141.75	100.5	136.75	122.25	1.42849e+06	0.7
Z5-E106	117.5	120	145.5	103	1.7855e+06	1.0075
Z5-E107	145	132	165	122	2294116	0.91
Z5-E108	123.2	116.4	145.8	107.2	1.66133e+06	0.938
Z5-E109	137	132.25	163.75	114.5	2.20017e+06	0.965
Z5-E110	128	108.25	135.75	101.75	1447734	0.8375
Z5-E111	157.75	131.75	167.75	125	2.52454e+06	0.8325
Z5-E112	112	85	110.5	94	759474	0.7575
Z5-E113	135	118.25	149	113.75	1.74432e+06	0.8775
Z5-E114	140	108.4	141.4	117.2	1.70193e+06	0.764
Z5-E115	132.5	110.5	141.5	110.25	1.54823e+06	0.8275
Z5-E116	124	104	131.75	100.25	1311579	0.83
Z5-E117	140.333	108.333	141.667	117	1.50687e+06	0.77
Z5-E118	141.6	107.2	140.6	117.6	1564604	0.752
Z5-E119	155.75	114.5	152.75	125	1888093	0.7375
Z5-E12	150	124.5	160.5	126	2280733	0.825
Z5-E121	134.5	115	146	115	1628963	0.855
Z5-E122	122	92.6667	119	98.3333	973824	0.76
Z5-E123	134	124	154.5	112	1.90468e+06	0.925
Z5-E124	123	107	138.75	108	1.29003e+06	0.8725
Z5-E126	127.25	129.5	159.75	109.5	1.99354e+06	1.02
Z5-E127	131.8	118.4	150.2	108.8	1.78967e+06	0.894
Z5-E128	121.333	104	132.667	103.667	1.21021e+06	0.856667
Z5-E129	135.5	124.75	158	116.75	2.0023e+06	0.9175
Z5-E13	147	127	161.333	118.333	2.21289e+06	0.863333
Z5-E130	136.2	110.6	144.6	118.2	1550862	0.814
Z5-E131	133.25	98.75	130.5	113	1.201e+06	0.7425
Z5-E133	155.4	170.4	206.4	136.8	4.27264e+06	1.1
Z5-E134	127.667	118.333	146	105.667	1.70625e+06	0.923333
Z5-E135	114.8	97.4	128.2	97.2	1.08381e+06	0.84
Z5-E136	126.75	97.25	129.75	108	1.19881e+06	0.76
Z5-E137	121	134.5	160.5	103.5	2091338	1.11
Z5-E138	130.5	121.5	154	115.75	1.77069e+06	0.9325
Z5-E139	115.5	66	96.5	93	497071	0.575
Z5-E140	149	149.5	179.75	118	3.20839e+06	0.9975
Z5-E141	132	97.3333	130.333	113.667	1.15346e+06	0.736667
Z5-E142	116.25	99.5	127.25	100	1130071	0.85
Z5-E144	146.667	133.333	164.667	122.667	2.51766e+06	0.9
Z5-E145	123.25	105.5	133.75	103.75	1.26307e+06	0.855
Z5-E146	150.667	89	129.333	131.333	1.16792e+06	0.59
Z5-E147	144.667	101.333	137.667	123.333	1.37962e+06	0.703333
Z5-E148	138.2	112.8	145.4	117.2	1.62927e+06	0.816
Z5-E149	114	108	134.5	95.5	1.22923e+06	0.95
Z5-E15	135	112	144.6	113.2	1596489	0.83
Z5-E150	126.75	111.25	142.25	110	1.52629e+06	0.8775
Z5-E151	135	103	137	114	1337954	0.76
Z5-E154	132	88	120.333	108	997452	0.663333
Z5-E155	131.667	95.3333	129.333	115	1.10918e+06	0.726667
Z5-E156	152.2	115.6	155.2	129.8	1.9066e+06	0.76
Z5-E158	137.5	113.25	145	116	1.64328e+06	0.825
Z5-E159	146.5	106.5	142.5	123.5	1.53411e+06	0.73
Z5-E16	140.2	117.2	151.2	119.6	1.79639e+06	0.834
Z5-E160	134.5	112.75	143	111	1.57071e+06	0.8375
Z5-E162	165.333	157.667	197.333	140.667	3.90266e+06	0.966667
Z5-E163	140.667	98	135	118.333	1.27613e+06	0.696667
Z5-E164	116.5	79.5	108.5	101	686952	0.68
Z5-E166	135.5	98	131.75	112.5	1.20971e+06	0.725
Z5-E168	127.333	105.667	137.333	112	1318368	0.826667
Z5-E169	117.5	72	101.75	94	648033	0.61
Z5-E170	137.4	149.2	181.2	120.4	3.0255e+06	1.082
Z5-E171	134.8	129.4	160	115	2.10721e+06	0.96
Z5-E172	123	98.75	128.25	106.75	1.10772e+06	0.8
Z5-E173	130.8	105.6	137.6	112	1.43307e+06	0.8
Z5-E174	142.5	104.5	137.5	118.5	1475538	0.735
Z5-E175	138.2	101.8	134.8	116	1366121	0.734
Z5-E176	125.75	97.5	128.25	104.75	1.1838e+06	0.77
Z5-E179	124.5	77.25	108.5	100.5	782283	0.61
Z5-E181	140.5	128.25	161.25	119	2.26866e+06	0.905
Z5-E183	129.6	97	127.4	108	1139505	0.746
Z5-E184	140.75	138	171.25	124	2.586e+06	0.98
Z5-E185	147.667	112	147.667	123	1.73883e+06	0.756667
Z5-E186	144.25	113.25	150	123	1.74038e+06	0.785
Z5-E19	120.5	127.25	154.5	107.5	1.85379e+06	1.0575
Z5-E190	137.75	161.75	189.25	113.75	3.51649e+06	1.17
Z5-E192	118.8	92.8	118.2	96.2	970805	0.782
Z5-E193	132	101.5	134	110	1.24616e+06	0.775
Z5-E195	129.333	114.667	144	113.667	1.6105e+06	0.886667
Z5-E196	137	82.75	117	113.75	967306	0.5975
Z5-E197	135.25	158.75	186.5	113.5	3.43484e+06	1.17
Z5-E198	140.8	90.4	128.2	120.2	1.10342e+06	0.64
Z5-E199	138.5	113	146.5	119	1.61895e+06	0.8175
Z5-E20	135.5	75	113	110.5	770234	0.55
Z5-E21	129	126	156.5	110.5	1.91218e+06	0.975
Z5-E210	142.5	125	153.5	115.25	2.03286e+06	0.875
Z5-E211	146.333	127	165	131	2222676	0.863333
Z5-E212	114	84	115	101	739034	0.74
Z5-E215	135.333	102	136.667	118	1.31658e+06	0.77
Z5-E22	125.2	119.2	148.2	108.2	1.66286e+06	0.952
Z5-E233	134.25	137.75	168.75	118.25	2.37503e+06	1.025
Z5-E25	125.75	108.5	138.75	104.5	1.40236e+06	0.8625
Z5-E27	150.2	110.2	146	123.4	1.74087e+06	0.734
Z5-E28	135.5	110.5	142	115.5	1.56847e+06	0.8225
Z5-E29	135	126.25	157.75	115.25	1979710	0.9375
Z5-E32	136.333	124	155.667	118	2.03641e+06	0.906667
Z5-E33	135.4	125	157.2	114.2	1.94799e+06	0.928
Z5-E35	125.6	89.2	121.6	107.2	941296	0.706
Z5-E37	126.5	109.75	140	107.25	1.47787e+06	0.8625
Z5-E39	144.2	152.6	181.6	124.4	3.2049e+06	1.058
Z5-E42	116.333	89	116.333	100.333	852877	0.763333
Z5-E43	123.8	84.4	116.4	107	830970	0.686
Z5-E44	125	144.75	172.75	111.75	2615617	1.165
Z5-E45	142.667	104.333	138.333	122.333	1.43262e+06	0.733333
Z5-E46	130.333	111.333	140	104.333	1.49811e+06	0.853333
Z5-E47	168.5	144.5	188	150	3.29831e+06	0.855
Z5-E48	155.5	121.25	159	131.75	2.09986e+06	0.78
Z5-E49	128.5	95.5	124.75	106	1.19092e+06	0.735
Z5-E5	139	125.75	157.75	118.5	2067880	0.9
Z5-E51	135.8	114.4	146.8	113.4	1.67659e+06	0.84
Z5-E55	142.5	92.25	128.25	119	1.1662e+06	0.645
Z5-E56	113	117.6	144.2	101	1.52965e+06	1.038
Z5-E57	144	148.5	180	119	2991563	1.035
Z5-E58	119	115.25	144.75	105.25	1455139	0.97
Z5-E60	125	106.8	138	107.8	1.41165e+06	0.86
Z5-E61	134.2	123.8	156	115.8	1.88877e+06	0.924
Z5-E62	133.25	125	155	116.25	1.90777e+06	0.945
Z5-E63	127.2	114.2	143.4	108.6	1.51821e+06	0.902
Z5-E66	118	83	111	97	753226	0.7
Z5-E68	129.5	125	156.5	113	1.85168e+06	0.965
Z5-E69	125.4	95.4	126.6	109.6	1.08976e+06	0.758
Z5-E7	135.75	101.5	133.5	113.75	1.42144e+06	0.74
Z5-E74	103	79	104	90	587280	0.77
Z5-E75	134.667	95.6667	127.667	108.333	1218407	0.71
Z5-E79	143.4	120.2	154.4	116.8	1.91992e+06	0.838
Z5-E8	117	92.3333	121.667	97.6667	971963	0.783333
Z5-E80	135.333	122.667	152.667	110.333	1.926e+06	0.91
Z5-E81	128.75	133.25	165.25	113.5	2.13016e+06	1.035
Z5-E82	137.667	104	138.333	120.667	1.36703e+06	0.756667
Z5-E83	135.75	136.25	166.75	116	2.46303e+06	0.9975
Z5-E84	121.667	102.333	129	96.3333	1.22167e+06	0.84
Z5-E85	143.4	107.2	141.4	118.6	1545611	0.746
Z5-E87	142.25	131.75	164.75	120.75	2.39836e+06	0.925
Z5-E88	133.5	91	124	110	1043979	0.68
Z5-E90	136.75	135	167	115	2.31475e+06	0.9875
Z5-E91	147.667	132	166.333	121	2.39872e+06	0.89
Z5-E92	114	116.2	140.6	97.2	1.48386e+06	1.018
Z5-E93	141.8	106.4	142.8	120.8	1.49692e+06	0.752
Z5-E94	152.5	101.75	141.25	130.75	1.49496e+06	0.6675
Z5-E95	122.667	98.3333	125.667	100.667	1.12085e+06	0.8
Z5-E96	135.2	134.4	165.6	111.8	2.54568e+06	0.986
Z5-E97	144	81	121	115	937845	0.56
Z5-E99	138.75	116	149.75	124.5	1.7549e+06	0.835
Total=533
mean	143.472	134.226	167.424	122.263	2.84578e+06	0.931857
max	192	224.6	264.8	169	8.64948e+06	1.532
min	103	66	96.5	90	497071	0.55
IBM=248
mean	141.981	129.993	162.766	122.184	2.74621e+06	0.918155
max	165	177.365	205.224	139.5	4.83825e+06	1.3055
min	124.253	98.5	129.5	103.705	1.33848e+06	0.679219
Z5=146
mean	133.991	112.501	144.389	113.204	1.67758e+06	0.838761
max	168.5	170.4	206.4	150	4.27264e+06	1.17
min	103	66	96.5	90	497071	0.55
Z24=139
mean	156.002	164.493	199.803	131.852	4.24354e+06	1.05403
max	192	224.6	264.8	169	8.64948e+06	1.532
min	124.8	93	122.333	103.4	1.1226e+06	0.67
Parents
B73	146.666	181.761	212.295	121.659	5.01206e+06	1.25751
Mo17	148.387	107.299	144.015	124.705	1.68298e+06	0.721119
CML277	125.733	89.8667	120.333	106.933	975666	0.714
P39	165.286	172.5	210.786	144.929	4.67601e+06	1.04214
