# Supplementary material for: Diversity of Maize Shoot Apical Meristem Architecture and Its Relationship to Plant Morphology
Source: G3 (Bethesda). 2015 Mar 5;5(5):819–27. doi: 10.1534/g3.115.017541 (PMC4426368; doi:10.1534/g3.115.017541)
Supplement: Supporting Information [file supp_g3.115.017541_TableS9.xlsx]

## Sheet: NAM RIL adult phenos
Supplementary data table S9. Adult plant phenotypes taken from panzea, with raw data for available field locations/years as well as calculated average. Environ_code locations and years are described on the Panzea web site.
Trait	DaystoSilk	DaystoSilk	DaystoSilk	DaystoSilk	DaystoSilk	DaystoSilk	DaystoSilk	DaystoSilk	DaystoSilk	DaystoSilk	DTS_Ave	DaysToTassel	DaysToTassel	DaysToTassel	DaysToTassel	DaysToTassel	DaysToTassel	DaysToTassel	DaysToTassel	DaysToTassel	DaysToTassel	DTT_ave	GDDDaystoSilk	GDDDaystoSilk	GDDDaystoSilk	GDDDaystoSilk	GDDDaystoSilk	GDDDaystoSilk	GDDDaystoSilk	GDDDaystoSilk	GDDDaystoSilk	GDDDaystoSilk	GDDTS_ave	GDDDaystoTassel	GDDDaystoTassel	GDDDaystoTassel	GDDDaystoTassel	GDDDaystoTassel	GDDDaystoTassel	GDDDaystoTassel	GDDDaystoTassel	GDDDaystoTassel	GDDDaystoTassel	GDDDaystoTassel	GDDDTT_ave	GDDAnthesis-SilkingInterval	GDDAnthesis-SilkingInterval	GDDAnthesis-SilkingInterval	GDDAnthesis-SilkingInterval
Environ_code	27M3	65	06A	06CL1	06PR	07A	07CL1	07U	08A	26M3	NA	27M3	65	06A	06CL1	06PR	07A	07CL1	07U	08A	26M3	NA	27M3	06A	06CL1	06FL1	06PR	07A	07CL1	07FL1	07U	26M3	NA	27M3	65	06A	06CL1	06FL1	06PR	07A	07CL1	07FL1	07U	26M3	NA	27M3	65	06A	06CL1
Z5-E1	88	90	75.5	56	82	69	72.5	89	74	NaN	77.3333	88	90	74.5	NaN	81	70	68.5	90	73	NaN	79.375	870.553	921.247	913.053	948.611	818.611	856.5	920	909.721	1012.58	NaN	907.875	1054.13	870.553	902.916	893.611	NaN	805.274	873.553	920	855.134	993.192	NaN	907.596	0	0	18.3317	19.4422
Z5-E2	80	97	73	59	83	71	74.5	NaN	67	NaN	75.5625	81	94	73	59	81	73	74.5	NaN	66	NaN	75.1875	936.942	876.111	884.442	997.221	828.611	891.884	854.163	937.971	895.134	NaN	900.276	931.22	913.634	876.111	884.442	997.221	805.274	927.832	879.442	937.971	883.413	NaN	903.656	-16.02	23.3028	0	0
Z5-E3	92	NaN	80	58	94	72	77.5	87	77	NaN	79.6875	84	NaN	77.5	58	89	73	76.5	86	76	NaN	77.5	NaN	999.236	NaN	980.553	961.111	910.024	959.721	987.134	1074.5	NaN	981.754	982.77	NaN	957.678	NaN	980.553	904.163	927.832	951.942	969.942	1054.25	NaN	966.141	129.91	NaN	41.5553	NaN
Z5-E4	86	106	77	58	90	74	79.5	102	72	NaN	82.7222	84	106	75	58	83	73	76.5	96	71	NaN	80.2778	964.803	948.942	962.221	980.553	916.111	944.053	936.111	1020.58	975.942	NaN	961.035	982.77	NaN	912.053	913.053	980.553	828.611	927.832	904.721	969.942	958.471	NaN	930.889	36.97	NaN	36.8869	49.1633
Z5-E5	90	106	82.5	63	92	77	78.5	92	72	NaN	83.6667	86	101	79.5	61	84	75	76.5	91	70	NaN	80.4444	964.803	1041.97	976.663	1059.16	938.884	985.721	1051.94	1005.19	975.942	NaN	1000.03	1019.75	964.803	992.026	913.053	1028.33	841.663	956.884	980	969.942	939.442	NaN	960.59	62.8	0	49.9422	63.6106
Z5-E6	95	NaN	82.5	62	101	84	82.5	NaN	78	80	83.125	94	NaN	83.5	63	101	85	86.5	NaN	78	80	83.875	NaN	1041.97	913.053	1043.61	1005.27	1097.05	989.721	1075.08	1095.52	1047.19	1034.28	1139.86	NaN	1057.94	913.053	1059.16	1005.27	1110.13	989.721	1144.05	1095.52	1047.19	1056.19	14.66	NaN	-15.9711	0
Z5-E7	82	93	76.5	60	83	72	71.5	87	72	NaN	77.4444	81	90	78.5	63	82	75	71.5	87	73	NaN	77.8889	904.774	939.75	893.611	1014.16	828.611	910.024	920	895.524	975.942	NaN	920.266	931.22	NaN	974.762	885.274	1059.16	818.611	956.884	920	895.524	993.192	NaN	937.181	16.8	NaN	-35.0119	8.33166
Z5-E8	94	100	79	57	92	73	75.5	88	77	NaN	81.7222	92	98	78.5	57	91	74	74.5	88	77	NaN	81.1111	964.803	983.401	913.053	964.442	938.884	927.832	920	953	1074.5	NaN	959.991	1112.69	944.111	974.637	913.053	964.442	930.832	944.053	920	937.971	1074.5	NaN	971.629	27.16	20.6922	8.76195	0
Z5-E9	86	100	77	61	87	74	75.5	NaN	77	NaN	79.6875	86	99	75.5	60	83	75	75.5	NaN	77	NaN	78.875	964.803	947.957	936.942	1028.33	883.332	944.053	989.721	953	1074.5	NaN	969.182	1019.75	954.024	921.166	913.053	1014.16	828.611	956.884	980	953	1074.5	NaN	961.515	0	10.7739	26.7908	23.8844
Z5-E10	86	NaN	80	59	93	77	79.5	94	72	NaN	80.0625	84	NaN	78.5	59	84	77	78.5	91	70	NaN	77.75	NaN	999.236	913.053	997.221	NaN	985.721	951.942	1020.58	975.942	NaN	977.671	982.77	NaN	974.637	913.053	997.221	NaN	985.721	951.942	1005.19	939.442	NaN	968.747	36.97	NaN	24.5961	0
Z5-E11	NaN	NaN	77	55	80	72	72.5	87	69	NaN	73.2143	NaN	NaN	77	56	80	72	71.5	90	69	NaN	73.6429	NaN	945.899	NaN	931.111	788.332	910.024	891.663	909.721	922.524	NaN	899.896	NaN	NaN	945.637	NaN	948.611	788.332	910.024	904.721	895.524	922.524	NaN	902.196	NaN	NaN	0.261945	NaN
Z5-E12	86	103	76.5	62	87	72	72.5	89	71	NaN	79.8889	84	96	75.5	61	84	72	70.5	89	70	NaN	78	964.803	938.207	901.663	1043.61	883.332	910.024	951.942	909.721	958.471	NaN	940.197	982.77	930.471	921.192	901.663	1028.33	841.663	910.024	920	882.274	939.442	NaN	925.783	36.97	34.3317	17.0144	0
Z5-E13	86	97	74.5	57	86	72	75.5	88	67	NaN	78.1111	86	97	74.5	57	82	72	73.5	87	65	NaN	77.1111	936.942	903.512	913.053	964.442	870.274	910.024	NaN	953	895.134	NaN	918.298	1019.75	936.942	902.916	893.611	964.442	818.611	910.024	936.111	924.303	870.611	NaN	917.732	0	0	0.596113	19.4422
Z5-E14	83	99	80	66	92	74	75.5	87	76	NaN	81.3889	84	94	75.5	64	85	72	73.5	85	74	NaN	78.5556	954.024	999.236	925.553	1104.44	938.884	944.053	998.611	953	1054.25	NaN	985.784	982.77	913.634	921.192	901.663	1074.44	856.384	910.024	951.942	924.303	1012.58	NaN	944.894	-17.69	40.3844	78.0408	23.8844
Z5-E15	NaN	NaN	90.5	57	95	82	83.5	NaN	78	NaN	81	95	NaN	85	57	82	79	82.5	101	77	NaN	82.3125	NaN	1178.78	893.611	964.442	NaN	1071.8	936.111	1092.94	1095.52	NaN	1033.32	1154.52	NaN	1081.13	884.442	964.442	NaN	1020.77	904.721	1075.08	1074.5	NaN	1019.95	NaN	NaN	97.6369	9.16334
Z5-E16	88	97	77	55	86	72	75.5	87	67	73	77.75	86	97	77.5	NaN	85	72	74.5	85	66	70	79.2222	936.942	948.942	913.053	931.111	870.274	910.024	891.663	953	895.134	932.134	918.228	1019.75	936.942	957.111	913.053	NaN	856.384	910.024	891.663	937.971	883.413	884.134	919.045	34.38	0	-8.16833	0
Z5-E17	95	NaN	82.5	59	98	77	79.5	98	76	NaN	83.125	92	NaN	80	NaN	92	75	82.5	96	73	NaN	84.3571	NaN	1041.97	NaN	997.221	994.163	985.721	959.721	1020.58	1054.25	NaN	1007.66	1112.69	NaN	999.236	NaN	NaN	938.884	956.884	959.721	1075.08	993.192	NaN	1005.1	41.83	NaN	42.7331	NaN
Z5-E18	88	NaN	79	60	92	74	78.5	88	72	NaN	78.9375	84	NaN	79	61	87	76	77.5	85	73	NaN	77.8125	NaN	979.872	913.053	1014.16	938.884	944.053	959.721	1005.19	975.942	NaN	966.36	982.77	NaN	979.872	893.611	1028.33	883.332	970.611	951.942	987.134	993.192	NaN	963.422	71.36	NaN	0	19.4422
Z5-E19	88	108	73.5	54	83	72	73.5	86	70	NaN	78.6667	86	106	72.5	55	83	72	75.5	85	74	NaN	78.7778	NaN	885.747	884.442	914.163	828.611	910.024	854.163	924.303	939.442	NaN	892.612	1019.75	NaN	869.067	884.442	931.111	828.611	910.024	854.163	953	1012.58	NaN	918.083	34.38	NaN	16.6778	0
Z5-E20	88	103	77	59	91	73	80.5	91	76	75	81.35	86	103	75.5	58	87	73	76.5	NaN	74	74	78.5556	964.803	948.942	874.442	997.221	930.832	927.832	920	1037.61	1054.25	962.111	961.804	1019.75	964.803	921.166	867.5	980.553	883.332	927.832	920	969.942	1012.58	946.942	946.764	34.38	0	27.7739	6.94222
Z5-E21	82	95	73.5	57	84	70	73.5	86	71	NaN	76.8889	81	95	74.5	59	82	72	73.5	86	69	NaN	76.8889	924.111	885.247	NaN	964.442	841.663	873.553	936.111	924.303	958.471	NaN	913.488	931.22	924.111	903.805	NaN	997.221	818.611	910.024	920	924.303	922.524	NaN	916.869	16.8	0	-18.5528	NaN
Z5-E22	86	100	77	64	89	75	78.5	92	75	NaN	81.8333	84	97	75.5	60	85	73	77.5	87	72	NaN	79	964.803	948.486	936.942	1074.44	904.163	956.884	920	1005.19	1032.72	NaN	971.515	982.77	936.942	921.166	893.611	1014.16	856.384	927.832	904.721	987.134	975.942	NaN	940.067	36.97	27.8606	27.3172	43.3317
Z5-E23	88	106	80	NaN	91	72	77.5	88	73	72	83.0556	88	102	80	NaN	90	75	78.5	88	73	72	82.9444	964.803	999.236	948.884	NaN	930.832	910.024	891.663	987.134	993.192	917.5	949.252	1054.13	964.803	1001.17	901.663	NaN	916.111	956.884	936.111	1005.19	993.192	917.5	964.675	0	0	-1.93028	47.2211
Z5-E24	NaN	97	78	NaN	86	NaN	79.5	NaN	NaN	NaN	85.125	NaN	96	75.5	NaN	83	NaN	76.5	NaN	NaN	NaN	82.75	936.942	966.25	948.884	NaN	870.274	NaN	963.884	1020.58	NaN	NaN	951.136	NaN	930.471	921.166	962.221	NaN	828.611	NaN	959.721	969.942	NaN	NaN	928.689	NaN	6.47111	45.0792	-13.3317
Z5-E25	86	103	74.5	56	NaN	72	74.5	95	71	NaN	79	84	100	74	54	NaN	72	73.5	90	70	NaN	77.1875	964.803	903.428	885.274	948.611	NaN	910.024	879.442	937.971	958.471	NaN	923.503	982.77	964.803	894.692	884.442	914.163	NaN	910.024	879.442	924.303	939.442	NaN	921.565	36.97	0	8.73555	0.831665
Z5-E26	83	99	76.5	58	91	72	75.5	NaN	68	NaN	77.875	84	99	75.5	58	85	72	73.5	NaN	70	NaN	77.125	954.024	939.75	893.611	980.553	930.832	910.024	891.663	953	908.332	NaN	929.088	982.77	954.024	921.166	885.274	980.553	856.384	910.024	891.663	924.303	939.442	NaN	924.56	-17.69	0	18.5792	8.33166
Z5-E27	86	103	76.5	60	84	72	75.5	92	70	NaN	79.8889	86	99	76	61	82	71	75.5	91	68	NaN	78.8333	964.803	938.844	NaN	1014.16	841.663	910.024	920	953	939.442	NaN	935.242	1019.75	954.024	930.384	NaN	1028.33	818.611	891.884	904.721	953	908.332	NaN	934.338	0	10.7739	8.45667	NaN
Z5-E28	NaN	NaN	80	63	96	76	82.5	NaN	77	80	79.2143	NaN	106	79	62	86	74	77.5	91	77	78	81.1667	NaN	1001.59	893.611	1059.16	980.832	970.611	891.663	1075.08	1074.5	1047.19	999.361	NaN	964.803	983.901	880.274	1043.61	870.274	944.053	854.163	987.134	1074.5	1011.52	961.424	NaN	NaN	17.6922	13.3317
Z5-E29	86	98	77.5	54	91	73	75.5	87	70	NaN	79.1111	86	97	77.5	54	86	73	74.5	87	69	NaN	78.2222	944.111	957.401	884.442	914.163	930.832	927.832	879.442	953	939.442	NaN	925.629	1019.75	936.942	957.678	888.332	914.163	870.274	927.832	904.721	937.971	922.524	NaN	928.019	0	7.16334	-0.278888	-3.88444
Z5-E30	83	100	77	NaN	82	72	73.5	NaN	67	NaN	79.2143	81	96	76	NaN	80	72	72.5	NaN	65	NaN	77.5	964.803	947.971	936.942	NaN	818.611	910.024	980	924.303	895.134	NaN	922.223	931.22	930.471	930.721	925.553	NaN	788.332	910.024	920	909.721	870.611	NaN	901.85	33.86	34.3317	17.25	11.3844
Z5-E31	80	105	76.5	60	82	73	73.5	NaN	70	NaN	77.5	81	NaN	75.5	61	81	74	73.5	NaN	69	NaN	73.5714	964.803	939.75	936.942	1014.16	818.611	927.832	920	924.303	939.442	NaN	931.761	931.22	NaN	921.166	913.053	1028.33	805.274	944.053	904.721	924.303	922.524	NaN	921.627	-16.02	NaN	18.5792	23.8844
Z5-E32	92	NaN	82	61	99	74	78.5	94	78	77	81.7222	90	NaN	83	59	90	75	76.5	93	78	77	80.1667	NaN	1034.53	893.611	1028.33	NaN	944.053	920	1005.19	1095.52	993.942	989.397	1082.55	NaN	1050.5	NaN	997.221	NaN	956.884	920	969.942	1095.52	993.942	1008.32	30.13	NaN	-15.9711	NaN
Z5-E33	86	106	74	56	90	75	75.5	94	72	NaN	80.9444	86	106	73.5	NaN	90	75	75.5	91	70	NaN	83.375	964.803	894.692	NaN	948.611	916.111	956.884	891.663	953	975.942	NaN	937.713	1019.75	NaN	885.247	NaN	NaN	916.111	956.884	904.721	953	939.442	NaN	939.308	0	NaN	9.44222	NaN
Z5-E34	94	NaN	86	57	101	82	87.5	NaN	88	84	84.9375	92	106	84	57	94	79	87.5	NaN	87	82	85.3889	NaN	1098.38	874.442	964.442	1005.27	1071.8	936.111	1162.05	1265.19	1123.5	1055.69	1112.69	964.803	1067.12	880.274	964.442	961.111	1020.77	920	1162.05	1249.75	1087	1035.46	27.16	NaN	31.2619	-5.83167
Z5-E35	83	106	79.5	57	88	75	75.5	90	70	75	79.9	84	104	79.5	NaN	86	75	74.5	87	70	70	81.1111	964.803	987.747	884.442	964.442	896.111	956.884	879.442	953	939.442	962.111	938.842	982.77	964.803	990.611	884.442	NaN	870.274	956.884	891.663	937.971	939.442	884.134	930.3	-17.69	0	-2.86306	0
Z5-E36	NaN	NaN	81.5	59	105	80	82.5	NaN	79	NaN	81.1667	NaN	NaN	82	NaN	100	80	82.5	82	78	NaN	84.0833	NaN	1027.32	976.663	997.221	1005.27	1037.41	963.884	1075.08	1110.77	NaN	1024.2	NaN	NaN	1036.08	976.663	NaN	1005.27	1037.41	980	1075.08	1095.52	NaN	1029.43	NaN	NaN	-8.76195	0
Z5-E37	86	105	79.5	58	96	73	75.5	89	71	NaN	81.4444	86	97	76	57	88	73	72.5	87	67	NaN	78.1667	964.803	989.317	NaN	980.553	980.832	927.832	936.111	953	958.471	NaN	961.365	1019.75	936.942	930.305	NaN	964.442	896.111	927.832	920	909.721	895.134	NaN	933.36	0	27.8606	59.0094	NaN
Z5-E38	86	106	79.5	60	99	73	80.5	99	75	NaN	84.2222	86	106	80	62	98	75	84.5	95	73	NaN	84.3889	964.803	992.026	936.942	1014.16	1000.27	927.832	NaN	1037.61	1032.72	NaN	988.296	1019.75	964.803	1001.17	925.553	1043.61	994.163	956.884	998.611	1111	993.192	NaN	1000.87	0	0	-9.13695	11.3844
Z5-E39	90	105	77.5	55	92	74	78.5	96	75	NaN	82.5556	88	105	76.5	54	92	75	77.5	94	73	NaN	81.6667	964.803	957.111	857.221	931.111	938.884	944.053	854.163	1005.19	1032.72	NaN	942.807	1054.13	964.803	939.346	843.884	914.163	938.884	956.884	841.111	987.134	993.192	NaN	943.353	28.41	0	17.7619	13.3317
Z5-E40	94	104	81.5	60	91	78	77.5	94	81	NaN	84.5556	90	104	80	62	87	78	76.5	93	78	NaN	83.1667	964.803	1026.03	976.663	1014.16	930.832	1002.75	989.721	987.134	1140.11	NaN	1003.58	1082.55	964.803	999.236	948.884	1043.61	883.332	1002.75	963.884	969.942	1095.52	NaN	995.452	57.3	0	26.7908	27.7739
Z5-E41	NaN	105	78	63	102	77	80.5	NaN	78	NaN	83.3571	NaN	100	75.5	64	92	75	77.5	NaN	74	NaN	79.7143	964.803	966.25	962.221	1059.16	NaN	985.721	959.721	1037.61	1095.52	NaN	1003.88	NaN	964.803	921.986	913.053	1074.44	NaN	956.884	951.942	987.134	1012.58	NaN	972.853	NaN	0	44.2619	49.1633
Z5-E42	86	NaN	79.5	56	85	74	73.5	84	NaN	73	76.375	84	NaN	77.5	NaN	84	73	72.5	86	NaN	73	78.5714	NaN	990.611	893.611	948.611	856.384	944.053	920	924.303	NaN	932.134	926.213	982.77	NaN	956.457	880.274	NaN	841.663	927.832	936.111	909.721	NaN	932.134	920.87	36.97	NaN	34.1514	13.3317
Z5-E43	83	107	84	61	87	77	75.5	87	76	75	81.25	82	106	81	58	85	75	72.5	86	73	72	79.05	964.803	1065.82	936.942	1028.33	883.332	985.721	936.111	953	1054.25	962.111	977.042	948.02	964.803	1017.57	925.553	980.553	856.384	956.884	920	909.721	993.192	917.5	944.562	17.05	0	48.2475	11.3844
Z5-E44	80	NaN	74	57	80	72	NaN	86	77	NaN	75.1429	80	NaN	74	54	78	70	NaN	88	77	NaN	74.4286	NaN	894.291	913.053	964.442	788.332	910.024	879.442	NaN	1074.5	NaN	917.726	915.19	NaN	894.692	880.274	914.163	759.163	873.553	827.774	NaN	1074.5	NaN	892.414	0	NaN	-0.40139	32.7739
Z5-E45	86	102	80.5	60	94	74	78.5	95	74	NaN	82.6667	86	102	78.5	61	91	74	76.5	94	72	NaN	81.6667	964.803	1010.05	913.053	1014.16	961.111	944.053	936.111	1005.19	1012.58	NaN	973.458	1019.75	964.803	975.442	893.611	1028.33	930.832	944.053	920	969.942	975.942	NaN	962.271	0	0	34.6081	19.4422
Z5-E46	86	102	77	55	88	74	75.5	87	74	NaN	79.8333	84	102	74.5	56	84	72	74.5	85	71	NaN	78.1111	964.803	948.942	913.053	931.111	896.111	944.053	904.721	953	1012.58	NaN	940.93	982.77	964.803	903.805	885.274	948.611	841.663	910.024	854.163	937.971	958.471	NaN	918.756	36.97	0	45.1344	27.7739
Z5-E47	82	NaN	75	57	83	73	75.5	91	69	NaN	75.6875	81	NaN	73.5	56	81	74	75.5	90	67	NaN	74.75	NaN	912.053	925.553	964.442	828.611	927.832	959.721	953	922.524	NaN	924.217	931.22	NaN	885.555	913.053	948.611	805.274	944.053	951.942	953	895.134	NaN	914.205	16.8	NaN	26.4975	12.5
Z5-E48	83	NaN	78.5	61	102	74	78.5	86	74	NaN	79.625	81	98	74	58	84	72	75.5	83	69	NaN	77.1667	NaN	975.442	913.053	1028.33	NaN	944.053	951.942	1005.19	1012.58	NaN	975.799	931.22	944.111	894.361	893.611	980.553	NaN	910.024	879.442	953	922.524	NaN	923.205	33.86	NaN	81.0792	19.4422
Z5-E49	94	NaN	84	56	103	82	87.5	NaN	81	NaN	83.9286	90	NaN	83	58	98	84	87.5	100	78	NaN	84.8125	NaN	1067.89	NaN	948.611	1005.27	1071.8	891.663	1162.05	1140.11	NaN	1041.06	1082.55	NaN	1049.86	893.611	980.553	994.163	1097.05	891.663	1162.05	1095.52	NaN	1027.45	57.3	NaN	18.0264	NaN
Z5-E50	84	106	81.5	65	92	75	75.5	90	74	73	81.6	84	101	79	63	90	75	75.5	87	72	72	79.85	964.803	1026.03	962.221	1090	938.884	956.884	NaN	953	1012.58	932.134	981.837	982.77	964.803	983.262	948.884	1059.16	916.111	956.884	959.721	953	975.942	917.5	965.276	0	0	42.7619	13.3317
Z5-E51	NaN	NaN	77	57	100	74	82.5	88	75	NaN	79.0714	95	NaN	77.5	NaN	99	77	80.5	88	75	NaN	84.5714	NaN	948.942	888.332	964.442	1005.27	944.053	920	1075.08	1032.72	NaN	972.356	NaN	NaN	957.678	893.611	NaN	1000.27	985.721	936.111	1037.61	1032.72	NaN	977.675	NaN	NaN	-8.73555	-5.27389
Z5-E52	88	100	76.5	59	86	71	73.5	86	68	NaN	78.6667	86	96	74.5	58	84	72	73.5	85	66	NaN	77.2222	964.803	939.75	948.884	997.221	870.274	891.884	951.942	924.303	908.332	NaN	933.044	1019.75	930.471	903.805	913.053	980.553	841.663	910.024	951.942	924.303	883.413	NaN	925.898	34.38	34.3317	35.9422	35.8317
Z5-E53	94	NaN	80.5	58	NaN	82	86.5	NaN	80	NaN	80.1667	94	NaN	80	60	103	82	82.5	NaN	78	NaN	82.7857	NaN	1010.36	936.942	980.553	NaN	1071.8	936.111	1144.05	1125.16	NaN	1029.28	1139.86	NaN	1001.17	925.553	1014.16	1005.27	1071.8	920	1075.08	1095.52	NaN	1027.6	0	NaN	9.19222	11.3844
Z5-E54	94	104	78	60	91	77	76.5	NaN	74	NaN	81.8125	86.5	104	74	59	88	75	73.5	89	71	NaN	80	964.803	966.25	NaN	1014.16	930.832	985.721	NaN	969.942	1012.58	NaN	977.756	NaN	964.803	894.361	NaN	997.221	896.111	956.884	NaN	924.303	958.471	NaN	941.736	NaN	0	71.8844	NaN
Z5-E55	82	101	76	58	84	72	72.5	92	76	NaN	79.2778	81	98	75.5	59	83	73	72.5	92	77	NaN	79	964.803	930.305	925.553	980.553	841.663	910.024	920	909.721	1054.25	NaN	937.43	931.22	944.111	921.166	925.553	997.221	828.611	927.832	920	909.721	1074.5	NaN	937.993	16.8	20.6922	9.13695	0
Z5-E56	86	97	78	64	89	75	75.5	90	76	NaN	81.1667	84	92	78.5	65	88	76	76.5	89	75	NaN	80.4444	936.942	966.25	936.942	1074.44	904.163	956.884	904.721	953	1054.25	NaN	965.288	982.77	896.413	975.442	913.053	1090	896.111	970.611	904.721	969.942	1032.72	NaN	963.178	36.97	40.5239	-9.19222	23.8844
Z5-E57	86	102	80.5	60	88	75	75.5	90	70	76	80.3	82	98	75.5	59	83	72	73.5	87	69	72	77.1	964.803	1010.36	913.053	1014.16	896.111	956.884	936.111	953	939.442	977.582	956.151	948.02	944.111	921.986	893.611	997.221	828.611	910.024	891.663	924.303	922.524	917.5	918.143	71.72	20.6922	88.3725	19.4422
Z5-E58	NaN	NaN	85.5	60	106	78	85.5	NaN	80	80	82.1429	90	NaN	83	60	101	77	80.5	NaN	77	76	80.5625	NaN	1090.51	936.942	1014.16	1005.27	1002.75	920	1128.02	1125.16	1047.19	1030	1082.55	NaN	1050.73	893.611	1014.16	1005.27	985.721	904.721	1037.61	1074.5	977.582	1002.65	NaN	NaN	39.7764	43.3317
Z5-E59	NaN	NaN	82.5	58	103	80	82.5	102	77	NaN	83.5714	NaN	NaN	82	NaN	103	80	84.5	100	78	NaN	87.9167	NaN	1041.97	936.942	980.553	1005.27	1037.41	920	1075.08	1074.5	NaN	1008.97	NaN	NaN	1034.53	936.942	NaN	1005.27	1037.41	904.721	1111	1095.52	NaN	1017.91	NaN	NaN	7.44222	0
Z5-E60	88	104	78.5	63	91	74	74.5	93	78	75	81.9	86	100	76	64	86	73	74.5	90	78	73	80.05	964.803	974.637	936.942	1059.16	930.832	944.053	959.721	937.971	1095.52	962.111	976.576	1019.75	964.803	930.305	913.053	1074.44	870.274	927.832	920	937.971	1095.52	932.134	962.372	34.38	0	44.3317	23.8844
Z5-E61	83	102	77	57	92	72	73.5	92	71	NaN	79.9444	84	102	76.5	58	87	72	72.5	89	69	NaN	78.8889	964.803	945.637	913.053	964.442	938.884	910.024	920	924.303	958.471	NaN	937.735	982.77	964.803	938.207	936.942	980.553	883.332	910.024	936.111	909.721	922.524	NaN	936.499	-17.69	0	7.43028	-23.8844
Z5-E62	86	103	76	59	86	72	73.5	84	73	NaN	79.1667	86	100	75.5	59	85	73	72.5	83	74	NaN	78.6667	964.803	930.611	880.274	997.221	870.274	910.024	904.721	924.303	993.192	NaN	930.602	1019.75	964.803	921.986	880.274	997.221	856.384	927.832	904.721	909.721	1012.58	NaN	939.527	0	0	8.625	0
Z5-E63	80	89	81.5	58	90	72	73.5	87	73	NaN	78.2222	81	89	79	59	86	74	75.5	87	71	NaN	77.9444	NaN	1026.03	913.053	980.553	916.111	910.024	920	924.303	993.192	NaN	947.908	931.22	NaN	983.262	925.553	997.221	870.274	944.053	920	953	958.471	NaN	942.562	-16.02	NaN	42.7619	-12.5
Z5-E64	NaN	NaN	83	59	106	78	NaN	NaN	79	84	81.5	95	NaN	82	59	98	79	86.5	NaN	79	83	82.6875	NaN	1049.84	913.053	997.221	1005.27	1002.75	959.721	NaN	1110.77	1123.5	1020.27	1154.52	NaN	1033.47	913.053	997.221	994.163	1020.77	936.111	1144.05	1110.77	1106.11	1041.02	NaN	NaN	16.375	0
Z5-E65	82	97	73.5	60	86	72	73.5	NaN	68	NaN	76.5	81	97	74	61	82	72	73.5	NaN	67	NaN	75.9375	936.942	885.555	913.053	1014.16	870.274	910.024	920	924.303	908.332	NaN	920.294	931.22	936.942	894.692	913.053	1028.33	818.611	910.024	920	924.303	895.134	NaN	917.231	16.8	0	-9.13695	0
Z5-E66	83	106	79	59	91	74	75.5	93	70	NaN	81.1667	84	102	77	NaN	88	73	75.5	89	68	NaN	82.0625	964.803	983.262	888.332	997.221	930.832	944.053	879.442	953	939.442	NaN	942.265	982.77	964.803	948.942	893.611	NaN	896.111	927.832	891.663	953	908.332	NaN	929.674	-17.69	0	34.3172	-5.27389
Z5-E67	90	108	82.5	60	88	77	NaN	97	NaN	78	85.0625	84	103	76	NaN	84	74	78.5	86	73	74	81.3889	964.803	1041.97	976.663	1014.16	896.111	985.721	959.721	NaN	NaN	1011.52	981.334	982.77	964.803	930.305	913.053	NaN	841.663	944.053	920	1005.19	993.192	946.942	944.197	99.77	0	111.663	63.6106
Z5-E68	88	95	76.5	59	87	74	75.5	85	69	NaN	78.7778	86	95	76.5	57	82	73	75.5	83	67	NaN	77.2222	924.111	939.75	NaN	997.221	883.332	944.053	920	953	922.524	NaN	935.499	1019.75	924.111	939.346	NaN	964.442	818.611	927.832	904.721	953	895.134	NaN	927.439	34.38	0	0.40139	NaN
Z5-E69	90	107	76	59	89	75	74.5	92	73	NaN	81.7222	88	107	75.5	59	87	75	75.5	91	71	NaN	81	964.803	930.305	893.611	997.221	904.163	956.884	891.663	937.971	993.192	NaN	941.09	1054.13	964.803	921.166	888.332	997.221	883.332	956.884	920	953	958.471	NaN	949.734	28.41	0	9.13695	5.27389
Z5-E70	NaN	NaN	91	61	89	83	87.5	NaN	83	NaN	82.4167	94	NaN	89	64	88	83	82.5	102	83	NaN	85.6875	NaN	1193.36	962.221	1028.33	904.163	1084.91	963.884	1162.05	1178.63	NaN	1059.69	1139.86	NaN	1151.61	948.884	1074.44	896.111	1084.91	963.884	1075.08	1178.63	NaN	1057.05	NaN	NaN	41.75	13.3317
Z5-E71	92	NaN	81.5	57	99	82	85.5	99	83	NaN	84.875	95	NaN	86	NaN	104	82	84.5	NaN	83	NaN	89.0833	NaN	1023.07	885.274	964.442	1000.27	1071.8	920	1128.02	1178.63	NaN	1021.44	1154.52	NaN	1102.54	925.553	NaN	1005.27	1071.8	963.884	1111	1178.63	NaN	1064.15	-41.83	NaN	-79.4711	-40.2739
Z5-E72	88	107	85.5	NaN	93	90	75.5	99	78	77	88.1111	88	104	82.5	NaN	90	89	74.5	95	79	76	86.4444	964.803	1089.65	962.221	NaN	949.163	1187.75	1064.44	953	1095.52	993.942	1028.94	1054.13	964.803	1043.29	962.221	NaN	916.111	1171.47	1029.44	937.971	1110.77	977.582	1016.78	0	0	46.3581	0
Z5-E73	NaN	NaN	85	65	89	80	77.5	87	74	75	79.0625	NaN	NaN	84	62	86	78	76.5	87	73	71	77.1875	NaN	1001.55	962.221	1090	904.163	1037.41	951.942	987.134	1012.58	962.111	989.902	NaN	NaN	1018.55	913.053	1043.61	870.274	1002.75	936.111	969.942	993.192	901.553	961.004	NaN	NaN	-17	49.1633
Z5-E74	86	104	80	60	89	75	77.5	92	72	77	81.25	84	98	77.5	58	84	75	73.5	87	70	74	78.1	964.803	1001.59	962.221	1014.16	904.163	956.884	951.942	987.134	975.942	993.942	971.279	982.77	944.111	957.111	925.553	980.553	841.663	956.884	920	924.303	939.442	946.942	938.121	36.97	20.6922	44.4831	36.6633
Z5-E75	84	94	74	56	93	77	78.5	NaN	77	NaN	79.1875	84	93	74	NaN	89	76	78.5	92	76	NaN	82.8125	913.634	894.692	901.663	948.611	949.163	985.721	936.111	1005.19	1074.5	NaN	956.588	982.77	904.774	894.692	913.053	NaN	904.163	970.611	936.111	1005.19	1054.25	NaN	951.735	0	8.86055	0	-11.3844
Z5-E76	55	107	80	66	100	76	78.5	97	76	78	81.35	86	107	80	64	94	77	76.5	96	75	77	83.25	964.803	999.236	913.053	1104.44	1005.27	970.611	951.942	1005.19	1054.25	1011.52	998.033	1019.75	964.803	999.236	885.274	1074.44	961.111	985.721	951.942	969.942	1032.72	993.942	985.353	NaN	0	0	27.7739
Z5-E77	NaN	NaN	82	58	94	75	80.5	92	77	76	79.3125	NaN	NaN	81.5	59	89	77	80.5	91	76	73	78.375	NaN	1033.47	962.221	980.553	961.111	956.884	951.942	1037.61	1074.5	977.582	992.875	NaN	NaN	1026.03	936.942	997.221	904.163	985.721	920	1037.61	1054.25	932.134	977.119	NaN	NaN	7.44222	25.2739
Z5-E78	NaN	NaN	83.5	NaN	106	80	86.5	101	76	NaN	88.8333	NaN	NaN	82.5	NaN	102	79	87.5	100	75	NaN	87.6667	NaN	1057.94	925.553	NaN	1005.27	1037.41	989.721	1144.05	1054.25	NaN	1030.6	NaN	NaN	1043.29	925.553	NaN	1005.27	1020.77	980	1162.05	1032.72	NaN	1024.24	NaN	NaN	14.6514	0
Z5-E79	82	95	77.5	60	81	72	73.5	84	70	NaN	77.2222	81	93	75.5	61	81	72	73.5	85	69	NaN	76.7778	924.111	957.401	936.942	1014.16	805.274	910.024	920	924.303	939.442	NaN	925.74	931.22	904.774	921.166	936.942	1028.33	805.274	910.024	920	924.303	922.524	NaN	920.456	16.8	19.3317	36.2331	0
Z5-E80	95	100	77.5	59	84	73	73.5	91	68	NaN	80.1111	NaN	100	77.5	59	82	72	72.5	90	68	NaN	77.625	964.803	957.111	901.663	997.221	841.663	927.832	936.111	924.303	908.332	NaN	928.782	NaN	964.803	957.111	885.274	997.221	818.611	910.024	920	909.721	908.332	NaN	919.011	NaN	0	0	16.3844
Z5-E81	81	87	73.5	53	84	71	73.5	83	68	NaN	74.8889	81	90	75	54	86	72	73.5	84	67	NaN	75.8333	832.163	885.747	884.442	897.774	841.663	891.884	920	924.303	908.332	NaN	887.368	931.22	870.553	912.053	884.442	914.163	870.274	910.024	920	924.303	895.134	NaN	903.217	0	-38.3844	-26.3053	0
Z5-E82	86	105	81	63	89	74	78.5	96	74	NaN	82.9444	84	104	77.5	61	84	72	75.5	93	73	NaN	80.4444	964.803	1017.57	962.221	1059.16	904.163	944.053	970.832	1005.19	1012.58	NaN	982.286	982.77	964.803	957.111	936.942	1028.33	841.663	910.024	951.942	953	993.192	NaN	951.978	36.97	0	60.4567	25.2739
Z5-E83	86	106	78.5	58	86	74	73.5	87	77	NaN	80.6667	81	106	76	58	83	74	72.5	87	77	NaN	79.3889	964.803	974.637	962.221	980.553	870.274	944.053	936.111	924.303	1074.5	NaN	959.05	931.22	964.803	930.305	936.942	980.553	828.611	944.053	936.111	909.721	1074.5	NaN	943.682	88.52	0	44.3317	25.2739
Z5-E84	88	98	78	62	87	76	78.5	96	73	NaN	81.8333	88	96	75	59	85	75	74.5	93	72	NaN	79.7222	944.111	966.303	962.221	1043.61	883.332	970.611	998.611	1005.19	993.192	NaN	974.131	1054.13	930.471	912.541	913.053	997.221	856.384	956.884	951.942	937.971	975.942	NaN	948.654	0	13.6344	53.7619	49.1633
Z5-E85	86	95	79.5	65	91	74	74.5	92	78	NaN	81.6667	84	95	77.5	63	86	74	73.5	91	76	NaN	80	924.111	993.094	936.942	1090	930.832	944.053	920	937.971	1095.52	NaN	974.725	982.77	924.111	957.111	913.053	1059.16	870.274	944.053	920	924.303	1054.25	NaN	954.909	36.97	0	35.9831	23.8844
Z5-E86	81	94	75.5	55	85	72	72.5	NaN	67	NaN	75.25	75	90	73.5	NaN	81	72	70.5	NaN	66	NaN	75.4286	913.634	921.192	913.053	931.111	856.384	910.024	920	909.721	895.134	NaN	907.806	848.05	870.553	885.555	893.611	NaN	805.274	910.024	891.663	882.274	883.413	NaN	874.491	83.16	43.0817	35.6369	19.4422
Z5-E87	79	98	78	58	84	74	72.5	83	NaN	70	77.3889	78	97	76	57	80	73	73.5	84	NaN	69	76.3889	944.111	965.901	913.053	980.553	841.663	944.053	951.942	909.721	NaN	884.134	926.126	885	936.942	930.611	913.053	964.442	788.332	927.832	920	924.303	NaN	870.111	906.062	15.3	7.16334	35.2908	0
Z5-E88	86	97	79	59	89	73	76.5	90	73	NaN	80.2778	81	94	76.5	59	84	72	77.5	87	71	NaN	78	936.942	983.401	962.221	997.221	904.163	927.832	1017.77	969.942	993.192	NaN	965.854	931.22	913.634	939.497	893.611	997.221	841.663	910.024	920	987.134	958.471	NaN	929.248	88.52	23.3028	43.9014	68.6106
Z5-E89	88	NaN	85.5	62	97	80	NaN	93	71	NaN	82.3571	86	NaN	79	59	86	77	77.5	90	70	NaN	78.0625	NaN	1090.51	NaN	1043.61	NaN	1037.41	989.721	NaN	958.471	NaN	1023.95	1019.75	NaN	983.401	NaN	997.221	NaN	985.721	951.942	987.134	939.442	NaN	980.659	34.38	NaN	107.108	NaN
Z5-E90	83	99	77	57	87	75	77.5	88	72	NaN	79.5	82	96	74.5	NaN	82	74	74.5	87	70	NaN	80	954.024	948.486	948.884	964.442	883.332	956.884	904.721	987.134	975.942	NaN	947.094	948.02	930.471	903.805	893.611	NaN	818.611	944.053	879.442	937.971	939.442	NaN	910.603	17.05	23.5528	44.6803	55.2739
Z5-E91	88	NaN	78.5	58	86	72	73.5	86	79	68	76.5556	88	NaN	79	60	83	72	75.5	86	77	68	76.5	NaN	974.666	948.884	980.553	870.274	910.024	879.442	924.303	1110.77	856.442	939.485	1054.13	NaN	983.401	NaN	1014.16	828.611	910.024	891.663	953	1074.5	856.442	951.771	0	NaN	-8.73555	NaN
Z5-E92	88	107	79	56	103	73	76.5	95	75	79	83.15	86	107	80.5	57	103	74	77.5	94	74	75	82.8	964.803	983.262	867.5	948.611	1005.27	927.832	854.163	969.942	1032.72	1028.72	958.283	1019.75	964.803	1010.05	843.884	964.442	1005.27	944.053	854.163	987.134	1012.58	962.111	960.75	34.38	0	-26.7908	23.6106
Z5-E93	83	106	75.5	56	86	72	73.5	84	69	NaN	78.3333	82	106	75.5	NaN	86	73	73.5	83	67	NaN	80.75	964.803	921.166	867.5	948.611	870.274	910.024	854.163	924.303	922.524	NaN	909.263	948.02	964.803	921.166	888.332	NaN	870.274	927.832	879.442	924.303	895.134	NaN	913.256	17.05	0	0	-20.8317
Z5-E94	88	94	78	56	84	75	75.5	87	70	NaN	78.6111	86	94	76.5	57	84	75	75.5	85	70	NaN	78.1111	913.634	966.25	913.053	948.611	841.663	956.884	879.442	953	939.442	NaN	923.553	1019.75	913.634	939.346	893.611	964.442	841.663	956.884	879.442	953	939.442	NaN	930.122	34.38	0	26.8989	19.4422
Z5-E95	90	NaN	75.5	58	87	72	75.5	89	73	70	76.6667	90	NaN	77	NaN	87	75	75.5	90	72	70	79.5625	NaN	921.986	901.663	980.553	883.332	910.024	879.442	953	993.192	884.134	923.036	1082.55	NaN	947.971	936.942	NaN	883.332	956.884	904.721	953	975.942	884.134	947.275	0	NaN	-25.9856	-35.2739
Z5-E96	83	105	75.5	57	84	75	75.5	87	68	NaN	78.8889	82	99	74.5	57	83	73	75.5	86	67	NaN	77.4444	964.803	921.986	893.611	964.442	841.663	956.884	989.721	953	908.332	NaN	932.716	948.02	954.024	903.805	888.332	964.442	828.611	927.832	951.942	953	895.134	NaN	921.514	17.05	10.7739	18.1778	5.27389
Z5-E97	86	100	74.5	54	92	72	77.5	88	73	NaN	79.6667	86	100	73.5	55	89	72	76.5	88	72	NaN	79.1111	964.803	903.428	901.663	914.163	938.884	910.024	854.163	987.134	993.192	NaN	929.717	1019.75	964.803	885.555	880.274	931.111	904.163	910.024	854.163	969.942	975.942	NaN	929.573	0	0	17.8725	21.3844
Z5-E98	NaN	NaN	86.5	60	NaN	83	NaN	NaN	82	81	78.5	NaN	NaN	84.5	NaN	NaN	82	82.5	NaN	79	77	81	NaN	1106.9	901.663	1014.16	NaN	1084.91	963.884	NaN	1159.97	1066.97	1042.64	NaN	NaN	1073.26	893.611	NaN	NaN	1071.8	936.111	1075.08	1110.77	993.942	1022.08	NaN	NaN	33.6369	8.05278
Z5-E99	84	97	77.5	59	83	74	74.5	86	73	73	78.1	84	94	77	60	82	75	74.5	88	72	74	78.05	936.942	957.678	901.663	997.221	828.611	944.053	959.721	937.971	993.192	932.134	938.919	982.77	913.634	948.942	913.053	1014.16	818.611	956.884	951.942	937.971	975.942	946.942	941.896	0	23.3028	8.73555	-11.3844
Z5-E100	82	92	77	59	87	72	75.5	85	71	NaN	77.8333	79	90	74.5	59	87	69	73.5	83	69	NaN	76	896.413	948.486	913.053	997.221	883.332	910.024	963.884	953	958.471	NaN	935.987	900.3	870.553	903.428	901.663	997.221	883.332	856.5	959.721	924.303	922.524	NaN	911.954	47.72	25.8606	45.0528	11.3844
Z5-E101	90	NaN	79.5	57	NaN	78	82.5	NaN	77	NaN	77.3333	90	NaN	83.5	NaN	NaN	80	84.5	NaN	75	NaN	82.6	NaN	992.401	925.553	964.442	NaN	1002.75	920	1075.08	1074.5	NaN	993.533	1082.55	NaN	1057.94	913.053	NaN	NaN	1037.41	936.111	1111	1032.72	NaN	1024.4	0	NaN	-65.5408	12.5
Z5-E102	82	94	75.5	60	84	72	73.5	88	68	NaN	77.4444	84	92	74	59	82	72	75.5	87	66	NaN	76.8333	913.634	921.192	962.221	1014.16	841.663	910.024	920	924.303	908.332	NaN	923.948	982.77	896.413	894.692	948.884	997.221	818.611	910.024	920	953	883.413	NaN	920.503	-34.75	17.2211	26.5	13.3317
Z5-E103	92	NaN	79.5	58	101	77	78.5	95	77	NaN	82.25	90	NaN	79.5	59	94	77	NaN	94	77	NaN	81.5	NaN	992.026	962.221	980.553	1005.27	985.721	936.111	1005.19	1074.5	NaN	992.7	1082.55	NaN	992.401	962.221	997.221	961.111	985.721	951.942	NaN	1074.5	NaN	1000.96	30.13	NaN	-0.375	0
Z5-E104	86	106	77.5	58	86	76	77.5	94	75	NaN	81.7778	86	99	73.5	NaN	83	72	75.5	89	73	NaN	81.375	964.803	957.401	893.611	980.553	870.274	970.611	920	987.134	1032.72	NaN	953.012	1019.75	954.024	885.555	880.274	NaN	828.611	910.024	879.442	953	993.192	NaN	922.652	0	10.7739	71.8436	13.3317
Z5-E105	86	NaN	78.5	59	85	75	73.5	91	73	NaN	77.625	82	NaN	75	58	81	74	73.5	88	71	NaN	75.3125	NaN	974.762	913.053	997.221	856.384	956.884	936.111	924.303	993.192	NaN	943.989	948.02	NaN	912.053	893.611	980.553	805.274	944.053	920	924.303	958.471	NaN	920.704	71.72	NaN	62.7067	19.4422
Z5-E106	88	108	81	60	92	78	78.5	92	72	NaN	83.2778	84	105	79.5	NaN	87	76	76.5	87	69	NaN	83	964.803	1014.55	976.663	1014.16	938.884	1002.75	998.611	1005.19	975.942	NaN	987.951	982.77	964.803	990.611	948.884	NaN	883.332	970.611	959.721	969.942	922.524	NaN	954.8	71.36	0	23.9422	27.7739
Z5-E107	84	NaN	75	58	86	72	73.5	85	72	NaN	75.6875	84	NaN	73.5	58	83	72	73.5	84	69	NaN	74.625	NaN	912.055	948.884	980.553	870.274	910.024	936.111	924.303	975.942	NaN	932.268	982.77	NaN	886.428	901.663	980.553	828.611	910.024	920	924.303	922.524	NaN	917.431	0	NaN	25.6225	47.2211
Z5-E108	88	104	77.5	59	86	74	75.5	87	69	NaN	80	86	98	75	NaN	82	73	75.5	85	67	NaN	80.1875	964.803	957.678	880.274	997.221	870.274	944.053	951.942	953	922.524	NaN	937.974	1019.75	944.111	912.053	880.274	NaN	818.611	927.832	920	953	895.134	NaN	918.974	34.38	20.6922	45.6225	0
Z5-E109	86	97	75.5	57	87	74	75.5	85	71	71	77.9	86	94	75.5	57	86	74	75.5	84	71	70	77.3	936.942	921.166	901.663	964.442	883.332	944.053	879.442	953	958.471	901.553	924.406	1019.75	913.634	921.166	893.611	964.442	870.274	944.053	879.442	953	958.471	884.134	927.452	0	23.3028	0	8.05278
Z5-E110	81	NaN	72.5	57	85	72	72.5	85	72	NaN	74.625	81	NaN	73.5	NaN	82	72	73.5	86	70	NaN	76.8571	NaN	866.997	884.442	964.442	856.384	910.024	879.442	909.721	975.942	NaN	905.924	931.22	NaN	885.247	884.442	NaN	818.611	910.024	879.442	924.303	939.442	NaN	896.591	0	NaN	-18.25	0
Z5-E111	92	94	73	59	82	72	72.5	84	68	NaN	77.3889	92	92	72.5	58	79	70	71.5	83	67	NaN	76.1111	913.634	876.134	913.053	997.221	818.611	910.024	879.442	909.721	908.332	NaN	902.908	NaN	896.413	866.997	893.611	980.553	772.5	873.553	879.442	895.524	895.134	NaN	883.748	NaN	17.2211	9.13695	19.4422
Z5-E112	83	91	73	56	84	72	73.5	84	72	NaN	76.5	81	91	73	55	79	70	73.5	83	67	NaN	74.7222	881.611	876.134	948.884	948.611	841.663	910.024	891.663	924.303	975.942	NaN	910.982	931.22	881.611	876.134	901.663	931.111	772.5	873.553	866.663	924.303	895.134	NaN	885.389	33.86	0	0	47.2211
Z5-E113	81	95	77.5	59	85	73	73.5	86	71	NaN	77.8889	80	95	77	59	82	72	73.5	85	70	NaN	77.0556	924.111	957.111	925.553	997.221	856.384	927.832	920	924.303	958.471	NaN	932.332	915.19	924.111	948.486	925.553	997.221	818.611	910.024	920	924.303	939.442	NaN	922.294	16.02	0	8.625	0
Z5-E114	86	NaN	80	61	86	75	75.5	94	73	73	78.1667	84	98	77	NaN	83	74	73.5	86	71	71	79.7222	NaN	999.236	1053.05	1028.33	870.274	956.884	1040.55	953	993.192	932.134	980.74	982.77	944.111	947.957	990.274	NaN	828.611	944.053	980	924.303	958.471	901.553	940.21	36.97	NaN	51.2764	62.7739
Z5-E115	81	106	74.5	56	93	72	73.5	83	71	NaN	78.8889	80	105	74	58	92	72	73.5	83	69	NaN	78.5	964.803	903.428	913.053	948.611	949.163	910.024	936.111	924.303	958.471	NaN	934.218	915.19	964.803	894.692	893.611	980.553	938.884	910.024	920	924.303	922.524	NaN	926.458	16.02	0	8.73555	19.4422
Z5-E116	82	101	75	56	86	72	73.5	87	70	73	77.55	82	97	76	56	83	72	73.5	87	69	72	76.75	964.803	912.704	884.442	948.611	870.274	910.024	920	924.303	939.442	932.134	920.674	948.02	936.942	930.305	884.442	948.611	828.611	910.024	920	924.303	922.524	917.5	915.571	0	27.8606	-17.5986	0
Z5-E117	NaN	104	80	59	86	74	73.5	85	69	NaN	78.8125	NaN	103	76	59	82	73	71.5	85	67	NaN	77.0625	964.803	999.236	885.274	997.221	870.274	944.053	936.111	924.303	922.524	NaN	938.2	NaN	964.803	930.305	885.274	997.221	818.611	927.832	920	895.524	895.134	NaN	914.967	NaN	0	68.9303	0
Z5-E118	88	106	81	58	91	74	76.5	90	79	NaN	82.6111	84	103	78	NaN	83	74	73.5	87	78	NaN	82.5625	964.803	1017.57	936.942	980.553	930.832	944.053	904.721	969.942	1110.77	NaN	973.354	982.77	964.803	965.901	925.553	NaN	828.611	944.053	904.721	924.303	1095.52	NaN	948.471	71.36	0	51.6633	11.3844
Z5-E119	83	106	75	58	84	72	73.5	86	71	73	78.15	81	102	75.5	NaN	81	73	74.5	85	68	72	79.1111	964.803	912.055	888.332	980.553	841.663	910.024	904.721	924.303	958.471	932.134	921.706	931.22	964.803	921.192	888.332	NaN	805.274	927.832	920	937.971	908.332	917.5	912.245	33.86	0	-9.13695	0
Z5-E120	NaN	NaN	86.5	61	105	80	85.5	98	78	NaN	84.8571	95	NaN	82	NaN	90	77	78.5	94	74	NaN	84.3571	NaN	1107.68	990.274	1028.33	NaN	1037.41	1029.44	1128.02	1095.52	NaN	1059.53	1154.52	NaN	1032.88	913.053	NaN	NaN	985.721	959.721	1005.19	1012.58	NaN	1009.1	NaN	NaN	74.7908	77.2211
Z5-E121	90	97	74.5	63	84	72	73.5	85	67	NaN	78.4444	NaN	93	75	63	82	74	72.5	85	66	NaN	76.3125	936.942	903.428	936.942	1059.16	841.663	910.024	970.832	924.303	895.134	NaN	930.937	NaN	904.774	912.053	913.053	1059.16	818.611	944.053	920	909.721	883.413	NaN	918.316	NaN	32.1633	-8.625	23.8844
Z5-E122	90	98	75.5	61	84	73	75.5	88	72	70	78.7	86	98	75.5	60	83	73	75.5	88	72	70	78.1	944.111	921.986	874.442	1028.33	841.663	927.832	904.721	953	975.942	884.134	925.616	1019.75	944.111	921.986	874.442	1014.16	828.611	927.832	891.663	953	975.942	884.134	930.512	62.8	0	0	0
Z5-E123	80	98	74	58	81	72	73.5	84	69	NaN	76.6111	78	94	73	56	79	70	71.5	82	68	NaN	74.6111	944.111	894.692	893.611	980.553	805.274	910.024	920	924.303	922.524	NaN	910.566	885	913.634	876.111	880.274	948.611	772.5	873.553	879.442	895.524	908.332	NaN	883.298	30.19	30.4711	18.5792	13.3317
Z5-E124	96	104	83.5	61	101	78	78.5	96	80	NaN	86.4444	86	100	81	NaN	88	77	77.5	91	77	NaN	84.6875	964.803	1057.94	1003.88	1028.33	NaN	1002.75	959.721	1005.19	1125.16	NaN	1018.47	NaN	964.803	1018.82	948.884	NaN	NaN	985.721	920	987.134	1074.5	NaN	985.694	NaN	0	39.1225	55
Z5-E125	86	NaN	77	55	90	74	78.5	90	72	NaN	77.8125	84	NaN	77.5	57	86	76	78.5	91	74	NaN	78	NaN	948.486	885.274	931.111	916.111	944.053	891.663	1005.19	975.942	NaN	937.229	982.77	NaN	957.678	885.274	964.442	870.274	970.611	920	1005.19	1012.58	NaN	952.091	36.97	NaN	-9.19222	0
Z5-E126	82	100	78.5	56	90	73	73.5	92	80	NaN	80.5556	81	97	76.5	56	86	72	72.5	90	80	NaN	79	964.803	975.442	893.611	948.611	916.111	927.832	920	924.303	1125.16	NaN	955.097	931.22	936.942	939.346	885.274	948.611	870.274	910.024	891.663	909.721	1125.16	NaN	934.824	16.8	27.8606	36.0936	8.33166
Z5-E127	88	100	81	NaN	84	74	75.5	92	74	NaN	83.5625	88	97	79	NaN	82	73	73.5	89	72	NaN	81.6875	964.803	1018.82	1016.94	NaN	841.663	944.053	980	953	1012.58	NaN	966.483	1054.13	936.942	983.901	962.221	NaN	818.611	927.832	963.884	924.303	975.942	NaN	949.752	0	27.8606	34.9133	54.7211
Z5-E128	94	NaN	83.5	62	98	78	82.5	NaN	78	78	81.75	94	NaN	80	61	89	75	80.5	95	77	75	80.7222	NaN	1057.94	913.053	1043.61	994.163	1002.75	920	1075.08	1095.52	1011.52	1012.63	1139.86	NaN	1001.55	880.274	1028.33	904.163	956.884	904.721	1037.61	1074.5	962.111	989.001	0	NaN	56.3869	32.7739
Z5-E129	90	104	75.5	57	90	72	77.5	92	73	NaN	81.2222	90	104	75.5	NaN	90	73	77.5	92	70	NaN	84	964.803	921.166	893.611	964.442	916.111	910.024	959.721	987.134	993.192	NaN	945.578	1082.55	964.803	921.166	893.611	NaN	916.111	927.832	959.721	987.134	939.442	NaN	954.708	0	0	0	0
Z5-E130	86	93	76	58	81	72	73.5	84	75	NaN	77.6111	84	91	73.5	57	81	72	70.5	84	74	NaN	76.3333	904.774	930.305	885.274	980.553	805.274	910.024	920	924.303	1032.72	NaN	921.47	982.77	881.611	885.247	880.274	964.442	805.274	910.024	891.663	882.274	1012.58	NaN	909.616	36.97	23.1633	45.0528	5
Z5-E131	NaN	NaN	86.5	64	NaN	80	84.5	NaN	80	84	79.8333	95	NaN	82.5	63	98	78	84.5	NaN	78	82	82.625	NaN	1108.52	925.553	1074.44	NaN	1037.41	959.721	1111	1125.16	1123.5	1058.16	1154.52	NaN	1041.34	884.442	1059.16	994.163	1002.75	951.942	1111	1095.52	1087	1038.18	NaN	NaN	67.1778	41.1106
Z5-E132	83	94	77	55	86	72	73.5	NaN	67	NaN	75.9375	82	94	75	55	83	72	73.5	NaN	66	NaN	75.0625	913.634	948.942	893.611	931.111	870.274	910.024	970.832	924.303	895.134	NaN	917.54	948.02	913.634	912.053	885.274	931.111	828.611	910.024	951.942	924.303	883.413	NaN	908.838	17.05	0	36.8869	8.33166
Z5-E133	92	100	83	56	88	73	74.5	86	72	75	79.95	90	97	81	57	88	73	74.5	86	70	74	79.05	964.803	1049.84	936.942	948.611	896.111	927.832	963.884	937.971	975.942	962.111	956.405	1082.55	936.942	1017.57	936.942	964.442	896.111	927.832	963.884	937.971	939.442	946.942	959.148	30.13	27.8606	32.2739	0
Z5-E134	86	103	77	60	86	73	75.5	92	72	72	79.65	84	98	76	60	86	74	74.5	90	71	70	78.35	964.803	948.486	913.053	1014.16	870.274	927.832	920	953	975.942	917.5	940.505	982.77	944.111	930.611	893.611	1014.16	870.274	944.053	891.663	937.971	958.471	884.134	931.985	36.97	20.6922	17.8725	19.4422
Z5-E135	88	106	83	63	99	77	78.5	94	78	NaN	85.1667	86	104	80.5	62	98	77	78.5	92	79	NaN	84.1111	964.803	1049.84	893.611	1059.16	1000.27	985.721	936.111	1005.19	1095.52	NaN	998.916	1019.75	964.803	1008.38	893.611	1043.61	994.163	985.721	920	1005.19	1110.77	NaN	994.6	34.38	0	41.4686	0
Z5-E136	86	100	77.5	56	85	75	75.5	86	70	76	78.7	86	100	77.5	55	83	75	74.5	87	70	76	78.4	964.803	957.111	874.442	948.611	856.384	956.884	936.111	953	939.442	977.582	936.437	1019.75	964.803	957.111	874.442	931.111	828.611	956.884	920	937.971	939.442	977.582	937.064	0	0	0	0
Z5-E137	NaN	104	77	58	94	78	73.5	94	71	NaN	81.1875	NaN	104	76.5	59	87	77	72.5	92	71	NaN	79.875	964.803	948.486	936.942	980.553	961.111	1002.75	936.111	924.303	958.471	NaN	957.059	NaN	964.803	939.75	913.053	997.221	883.332	985.721	920	909.721	958.471	NaN	941.341	NaN	0	8.73555	23.8844
Z5-E138	94	NaN	85	59	104	79	82.5	102	77	77	84.3889	90	NaN	81.5	59	94	76	80.5	96	74	73	80.4444	NaN	1083.07	1003.88	997.221	1005.27	1020.77	904.721	1075.08	1074.5	993.942	1017.61	1082.55	NaN	1026.03	913.053	997.221	961.111	970.611	891.663	1037.61	1012.58	932.134	982.456	57.3	NaN	57.0383	90.8317
Z5-E139	83	106	81.5	60	90	74	75.5	86	71	NaN	80.7778	84	100	77	59	86	74	73.5	84	67	NaN	78.2778	964.803	1026.03	936.942	1014.16	916.111	944.053	NaN	953	958.471	NaN	964.196	982.77	964.803	948.942	936.942	997.221	870.274	944.053	NaN	924.303	895.134	NaN	940.494	-17.69	0	77.0817	0
Z5-E140	81	97	73	54	81	69	73.5	79	62	NaN	74.3889	81	97	71.5	54	78	69	71.5	78	61	NaN	73.4444	936.942	879.317	884.442	914.163	805.274	856.5	879.442	924.303	810.384	NaN	876.752	931.22	936.942	850.509	874.442	914.163	759.163	856.5	879.442	895.524	791.692	NaN	868.96	0	0	28.8053	10
Z5-E141	84	97	76	59	87	75	73.5	83	67	68	76.95	84	94	74.5	NaN	81	73	NaN	82	66	68	77.8125	936.942	930.611	913.053	997.221	883.332	956.884	936.111	924.303	895.134	856.442	923.003	982.77	913.634	903.805	913.053	NaN	805.274	927.832	936.111	NaN	883.413	856.442	902.482	0	23.3028	26.8028	0
Z5-E142	83	104	77.5	56	90	74	75.5	87	70	NaN	79.6667	84	102	76	NaN	88	73	74.5	87	69	NaN	81.6875	964.803	956.108	936.942	948.611	916.111	944.053	920	953	939.442	NaN	942.119	982.77	964.803	930.384	913.053	NaN	896.111	927.832	920	937.971	922.524	NaN	932.827	-17.69	0	25.7211	23.8844
Z5-E143	83	103	77.5	59	91	75	75.5	97	69	NaN	81.1111	84	100	75.5	NaN	89	74	75.5	95	67	NaN	82.5	964.803	957.111	893.611	997.221	930.832	956.884	891.663	953	922.524	NaN	940.85	982.77	964.803	921.986	888.332	NaN	904.163	944.053	891.663	953	895.134	NaN	927.323	-17.69	0	35.1225	5.27389
Z5-E144	90	NaN	82	56	92	75	NaN	100	77	77	81.125	NaN	NaN	82	57	91	77	80.5	101	77	76	80.1875	NaN	1033.47	874.442	948.611	938.884	956.884	841.111	NaN	1074.5	993.942	957.73	NaN	NaN	1033.47	874.442	964.442	930.832	985.721	879.442	1037.61	1074.5	977.582	973.116	NaN	NaN	0	0
Z5-E145	88	NaN	82	65	98	76	80.5	91	73	NaN	81.6875	88	NaN	78	65	94	74	80.5	90	70	NaN	79.9375	NaN	1033.47	913.053	1090	994.163	970.611	951.942	1037.61	993.192	NaN	998.005	1054.13	NaN	966.303	913.053	1090	961.111	944.053	920	1037.61	939.442	NaN	980.634	0	NaN	67.1658	0
Z5-E146	NaN	90	73.5	61	87	74	74.5	85	NaN	69	76.75	NaN	90	74	62	87	74	74.5	87	NaN	69	77.1875	870.553	885.247	962.221	1028.33	883.332	944.053	963.884	937.971	NaN	870.111	927.3	NaN	870.553	894.361	962.221	1043.61	883.332	944.053	963.884	937.971	NaN	870.111	930.011	NaN	0	-9.11055	0
Z5-E147	86	95	75	56	88	73	75.5	88	69	71	77.65	86	95	76	NaN	83	75	76.5	90	70	73	80.5	924.111	912.541	901.663	948.611	896.111	927.832	891.663	953	922.524	901.553	917.961	1019.75	924.111	930.305	913.053	NaN	828.611	956.884	920	969.942	939.442	932.134	933.423	0	0	-17.7619	-11.3844
Z5-E148	83	103	77	58	90	74	75.5	86	69	NaN	79.5	81	101	74.5	59	89	72	75.5	85	66	NaN	78.1111	964.803	947.344	913.053	980.553	916.111	944.053	970.832	953	922.524	NaN	945.808	931.22	964.803	903.512	884.442	997.221	904.163	910.024	959.721	953	883.413	NaN	929.152	33.86	0	43.8317	28.6106
Z5-E149	NaN	104	76	60	91	74	75.5	88	73	NaN	80.1875	NaN	104	73.5	NaN	88	74	75.5	86	72	NaN	81.8571	964.803	930.384	962.221	1014.16	930.832	944.053	1040.55	953	993.192	NaN	970.356	NaN	NaN	885.555	962.221	NaN	896.111	944.053	970.832	953	975.942	NaN	941.102	NaN	NaN	44.8292	0
Z5-E150	88	105	79.5	55	92	75	78.5	NaN	NaN	79	81.5	88	103	79	55	87	75	77.5	NaN	NaN	78	80.3125	964.803	992.026	893.611	931.111	938.884	956.884	920	1005.19	NaN	1028.72	959.026	1054.13	964.803	983.262	874.442	931.111	883.332	956.884	891.663	987.134	NaN	1011.52	953.829	0	0	8.76195	19.1633
Z5-E151	91	NaN	79.5	56	NaN	78	84.5	NaN	77	NaN	77.6667	86	NaN	79.5	55	107	78	78.5	94	73	NaN	81.375	NaN	989.317	893.611	948.611	NaN	1002.75	879.442	1111	1074.5	NaN	985.604	1019.75	NaN	990.611	867.5	931.111	1005.27	1002.75	841.111	1005.19	993.192	NaN	961.832	77.55	NaN	-1.29333	26.1106
Z5-E152	88	106	83.5	NaN	94	73	75.5	92	NaN	NaN	87.4286	84	100	83.5	NaN	94	75	75.5	91	NaN	NaN	86.1429	964.803	1059.43	901.663	NaN	961.111	927.832	904.721	953	NaN	NaN	953.222	982.77	964.803	1058.59	901.663	NaN	961.111	956.884	936.111	953	NaN	NaN	964.367	71.36	0	0.834165	0
Z5-E153	95	NaN	84	60	93	82	84.5	99	79	NaN	84.5625	90	106	81	NaN	92	79	84.5	94	77	NaN	87.9375	NaN	1068.15	913.053	1014.16	949.163	1071.8	951.942	1111	1110.77	NaN	1023.76	1082.55	964.803	1014.55	901.663	NaN	938.884	1020.77	959.721	1111	1074.5	NaN	1007.61	71.97	NaN	53.5936	11.3844
Z5-E154	79	98	74	58	87	72	75.5	87	70	NaN	77.8333	80	96	74	56	86	73	75.5	88	70	NaN	77.6111	944.111	894.692	888.332	980.553	883.332	910.024	951.942	953	939.442	NaN	927.27	915.19	930.471	894.361	885.274	948.611	870.274	927.832	891.663	953	939.442	NaN	915.612	-14.88	13.6344	0.331668	3.05278
Z5-E155	86	104	79	60	91	77	80.5	92	71	72	81.25	86	103	78.5	59	89	76	78.5	91	71	71	80.3	964.803	983.262	936.942	1014.16	930.832	985.721	980	1037.61	958.471	917.5	970.93	1019.75	964.803	974.762	893.611	997.221	904.163	970.611	959.721	1005.19	958.471	901.553	959.078	0	0	8.5	43.3317
Z5-E156	86	104	76	59	89	74	75.5	88	69	71	79.15	79	102	73.5	56	86	72	75.5	86	67	70	76.7	964.803	930.384	913.053	997.221	904.163	944.053	891.663	953	922.524	901.553	932.242	900.3	964.803	885.555	874.442	948.611	870.274	910.024	879.442	953	895.134	884.134	905.975	119.44	0	44.8292	38.6106
Z5-E157	NaN	NaN	91.5	65	99	83	80.5	95	75	NaN	84.1429	NaN	NaN	87	66	98	83	80.5	93	74	NaN	83.0714	NaN	1198.3	1053.05	1090	1000.27	1084.91	970.832	1037.61	1032.72	NaN	1058.46	NaN	NaN	1116.4	976.663	1104.44	994.163	1084.91	920	1037.61	1012.58	NaN	1030.85	NaN	NaN	81.8989	76.3844
Z5-E158	83	94	79	59	84	72	73.5	84	78	73	77.95	84	90	78.5	58	83	72	73.5	85	78	74	77.6	913.634	981.875	962.221	997.221	841.663	910.024	951.942	924.303	1095.52	932.134	951.054	982.77	NaN	974.666	962.221	980.553	828.611	910.024	951.942	924.303	1095.52	946.942	955.756	-17.69	NaN	7.20667	0
Z5-E159	88	101	77	60	85	76	75.5	97	75	NaN	81.6111	88	97	76.5	59	84	75	75.5	96	75	NaN	80.6667	964.803	947.971	962.221	1014.16	856.384	970.611	936.111	953	1032.72	NaN	959.776	1054.13	936.942	939.346	948.884	997.221	841.663	956.884	920	953	1032.72	NaN	958.079	0	27.8606	8.625	13.3317
Z5-E160	86	NaN	80.5	61	85	74	73.5	96	70	NaN	78.25	82	NaN	78.5	60	81	75	75.5	92	67	NaN	76.375	NaN	1005.18	962.221	1028.33	856.384	944.053	920	924.303	939.442	NaN	947.489	948.02	NaN	972.43	913.053	1014.16	805.274	956.884	904.721	953	895.134	NaN	929.187	71.72	NaN	32.75	49.1633
Z5-E161	81	94	72	60	83	72	73.5	89	70	69	76.35	81	90	73.5	60	76	72	73.5	88	70	68	75.2	913.634	857.861	936.942	1014.16	828.611	910.024	936.111	924.303	939.442	870.111	913.12	931.22	870.553	885.555	936.942	1014.16	736.942	910.024	936.111	924.303	939.442	856.442	903.791	0	43.0817	-27.6922	0
Z5-E162	88	102	79.5	NaN	88	75	75.5	92	70	NaN	83.75	84	100	76.5	NaN	88	75	75.5	90	68	NaN	82.125	964.803	987.747	936.942	NaN	896.111	956.884	936.111	953	939.442	NaN	946.38	982.77	964.803	939.497	901.663	NaN	896.111	956.884	936.111	953	908.332	NaN	937.686	71.36	0	48.25	35.2739
Z5-E163	NaN	107	81.5	60	90	80	75.5	92	74	NaN	82.5	NaN	105	80	NaN	86	80	74.5	91	70	NaN	83.7857	964.803	1025.01	936.942	1014.16	916.111	1037.41	920	953	1012.58	NaN	975.558	NaN	964.803	1001.17	913.053	NaN	870.274	1037.41	920	937.971	939.442	NaN	948.015	NaN	0	23.8436	23.8844
Z5-E164	NaN	105	85.5	NaN	102	83	87.5	101	NaN	80	92	90	99	82.5	58	102	80	82.5	99	74	77	84.4	964.803	1089.65	962.221	NaN	1005.27	1084.91	936.111	1162.05	NaN	1047.19	1031.53	1082.55	954.024	1043.29	936.942	980.553	1005.27	1037.41	904.721	1075.08	1012.58	993.942	1002.4	NaN	10.7739	46.3581	25.2739
Z5-E165	92	99	75.5	54	97	75	78.5	88	71	NaN	81.1111	88	99	75.5	55	89	75	78.5	87	71	NaN	79.7778	954.024	921.166	893.611	914.163	985.832	956.884	879.442	1005.19	958.471	NaN	940.976	1054.13	954.024	921.166	884.442	931.111	904.163	956.884	891.663	1005.19	958.471	NaN	946.125	58.55	0	0	9.16334
Z5-E166	82	106	81	58	88	74	73.5	86	70	NaN	79.8333	82	98	77.5	NaN	84	73	73.5	85	67	NaN	80	964.803	1017.57	948.884	980.553	896.111	944.053	970.832	924.303	939.442	NaN	954.061	948.02	944.111	956.457	925.553	NaN	841.663	927.832	951.942	924.303	895.134	NaN	923.89	0	20.6922	61.1081	23.3317
Z5-E167	94	NaN	82.5	NaN	94	77	85.5	100	76	NaN	87	92	NaN	83	NaN	93	79	84.5	NaN	75	NaN	84.4167	NaN	1041.97	NaN	NaN	961.111	985.721	951.942	1128.02	1054.25	NaN	1020.5	1112.69	NaN	1050.5	NaN	NaN	949.163	1020.77	951.942	1111	1032.72	NaN	1032.68	27.16	NaN	-8.52889	NaN
Z5-E168	94	106	81	62	92	77	79.5	94	78	NaN	84.8333	94	105	81.5	NaN	93	80	NaN	93	78	NaN	89.2143	964.803	1018.55	913.053	1043.61	938.884	985.721	920	1020.58	1095.52	NaN	988.97	1139.86	964.803	1025.01	913.053	NaN	949.163	1037.41	920	NaN	1095.52	NaN	1005.6	0	0	-6.45916	0
Z5-E169	93	NaN	79	60	94	77	82.5	95	74	NaN	81.8125	93	NaN	76.5	NaN	92	75	80.5	91	71	NaN	82.7143	NaN	983.262	874.442	1014.16	961.111	985.721	879.442	1075.08	1012.58	NaN	973.226	1125.94	NaN	939.75	867.5	NaN	938.884	956.884	841.111	1037.61	958.471	NaN	958.269	0	NaN	43.5119	6.94222
Z5-E170	83	104	76	55	85	72	74.5	90	71	72	78.25	82	92	76.5	NaN	85	73	75.5	89	70	73	79.5556	NaN	930.384	925.553	931.111	856.384	910.024	959.721	937.971	958.471	917.5	925.235	948.02	NaN	939.497	901.663	NaN	856.384	927.832	951.942	953	939.442	932.134	927.768	17.05	NaN	-9.11055	23.8844
Z5-E171	NaN	NaN	84.5	54	101	77	79.5	97	73	78	80.5	NaN	NaN	77.5	NaN	98	75	78.5	92	70	75	80.8571	NaN	1073.26	936.942	914.163	1005.27	985.721	936.111	1020.58	993.192	1011.52	986.308	NaN	NaN	957.111	885.274	NaN	994.163	956.884	904.721	1005.19	939.442	962.111	950.612	NaN	NaN	116.149	51.6633
Z5-E172	NaN	93	74	56	84	74	75.5	87	69	69	75.7222	NaN	93	74	57	82	74	73.5	87	67	68	75.0556	904.774	894.692	874.442	948.611	841.663	944.053	866.663	953	922.524	870.111	902.053	NaN	904.774	894.692	843.884	964.442	818.611	944.053	866.663	924.303	895.134	856.442	891.3	NaN	0	0	30.5528
Z5-E173	114	97	77	62	85	70	73.5	86	77	NaN	82.3889	84	93	76	61	83	70	70.5	85	77	NaN	77.7222	936.942	948.942	913.053	1043.61	856.384	873.553	904.721	924.303	1074.5	NaN	941.779	982.77	904.774	930.305	893.611	1028.33	828.611	873.553	904.721	882.274	1074.5	NaN	930.345	NaN	32.1633	18.6344	19.4422
Z5-E174	90	102	76	58	95	74	74.5	92	73	NaN	81.6111	91	98	75.5	58	91	75	74.5	90	72	NaN	80.5556	964.803	930.384	NaN	980.553	972.774	944.053	936.111	937.971	993.192	NaN	957.48	1097.3	944.111	921.192	NaN	980.553	930.832	956.884	936.111	937.971	975.942	NaN	964.544	-14.75	20.6922	9.19222	NaN
Z5-E175	86	101	76.5	58	88	72	78.5	92	76	NaN	80.8889	82	107	76.5	59	87	75	74.5	93	73	NaN	80.7778	964.803	939.497	901.663	980.553	896.111	910.024	879.442	1005.19	1054.25	NaN	947.948	948.02	964.803	939.497	925.553	997.221	883.332	956.884	904.721	937.971	993.192	NaN	945.119	71.72	0	0	-23.8844
Z5-E176	90	101	78.5	57	91	74	74.5	91	72	NaN	81	NaN	101	75.5	NaN	86	74	74.5	88	69	NaN	81.1429	964.803	974.666	936.942	964.442	930.832	944.053	951.942	937.971	975.942	NaN	953.51	NaN	964.803	921.192	913.053	NaN	870.274	944.053	920	937.971	922.524	NaN	924.234	NaN	0	53.4711	23.8844
Z5-E177	86	94	77.5	59	88	74	74.5	NaN	69	NaN	77.75	80	93	75	59	82	72	74.5	NaN	67	NaN	75.3125	913.634	956.457	948.884	997.221	896.111	944.053	989.721	937.971	922.524	NaN	945.175	915.19	904.774	912.055	901.663	997.221	818.611	910.024	963.884	937.971	895.134	NaN	915.653	104.55	8.86055	44.4014	47.2211
Z5-E178	NaN	104	80	61	91	77	NaN	93	78	NaN	83.4286	92	104	80.5	63	89	76	82.5	94	77	NaN	84.2222	964.803	998.053	948.884	1028.33	930.832	985.721	936.111	NaN	1095.52	NaN	986.032	1112.69	964.803	1005.71	936.942	1059.16	904.163	970.611	936.111	1075.08	1074.5	NaN	1003.98	NaN	0	-7.65139	11.9422
Z5-E179	83	93	76	59	84	72	73.5	88	75	NaN	78.1667	84	91	74.5	NaN	82	73	73.5	88	74	NaN	80	904.774	930.384	962.221	997.221	841.663	910.024	951.942	924.303	1032.72	NaN	939.473	982.77	881.611	903.428	948.884	NaN	818.611	927.832	936.111	924.303	1012.58	NaN	926.237	-17.69	23.1633	26.9567	13.3317
Z5-E180	83	94	75.5	55	83	72	73.5	85	70	NaN	76.7778	81	92	72.5	NaN	81	72	73.5	83	69	NaN	78	913.634	921.192	NaN	931.111	828.611	910.024	963.884	924.303	939.442	NaN	916.525	931.22	896.413	869.067	NaN	NaN	805.274	910.024	951.942	924.303	922.524	NaN	901.346	33.86	17.2211	52.125	NaN
Z5-E181	NaN	NaN	92	57	103	83	87.5	NaN	79	78	82.7857	NaN	NaN	88.5	NaN	101	82	87.5	100	77	77	87.5714	NaN	1208.05	901.663	964.442	1005.27	1084.91	891.663	1162.05	1110.77	1011.52	1037.82	NaN	NaN	1142.94	901.663	NaN	1005.27	1071.8	904.721	1162.05	1074.5	993.942	1032.11	NaN	NaN	65.1081	0
Z5-E182	94	NaN	84	NaN	102	82	82.5	NaN	77	NaN	86.9167	92	NaN	80	NaN	94	79	82.5	99	77	NaN	86.2143	NaN	1067.09	936.942	NaN	1005.27	1071.8	980	1075.08	1074.5	NaN	1030.1	1112.69	NaN	1001.17	913.053	NaN	961.111	1020.77	963.884	1075.08	1074.5	NaN	1015.28	27.16	NaN	65.9278	23.8844
Z5-E183	94	NaN	83.5	64	90	78	80.5	93	76	NaN	82.375	88	NaN	80	64	86	78	78.5	92	73	NaN	79.9375	NaN	1058.36	1016.94	1074.44	916.111	1002.75	989.721	1037.61	1054.25	NaN	1018.77	1054.13	NaN	999.236	990.274	1074.44	870.274	1002.75	980	1005.19	993.192	NaN	996.61	85.72	NaN	59.1225	26.6633
Z5-E184	94	NaN	79.5	64	91	77	77.5	89	71	73	79.5556	90	101.5	76.5	63	85	75	75.5	86	69	69	79.05	NaN	992.026	1041.66	1074.44	930.832	985.721	1029.44	987.134	958.471	932.134	992.43	1082.55	964.803	939.497	1003.88	1059.16	856.384	956.884	970.832	953	922.524	870.111	961.785	57.3	NaN	52.5264	37.7739
Z5-E185	88	106	76.5	63	89	73	75.5	88	74	NaN	81.4444	86	106	75	63	88	73	75.5	86	70	NaN	80.2778	964.803	939.346	936.942	1059.16	904.163	927.832	936.111	953	1012.58	NaN	959.327	1019.75	964.803	912.541	913.053	1059.16	896.111	927.832	891.663	953	939.442	NaN	947.736	34.38	0	26.8053	23.8844
Z5-E186	86	90	76	62	82	73	75.5	88	69	NaN	77.9444	86	87	75	61	81	72	75.5	89	70	NaN	77.3889	870.553	930.384	893.611	1043.61	818.611	927.832	959.721	953	922.524	NaN	924.427	1019.75	NaN	912.053	893.611	1028.33	805.274	910.024	959.721	953	939.442	NaN	935.69	0	NaN	18.3317	0
Z5-E187	NaN	NaN	81	58	97	81	84.5	101	81	NaN	83.3571	92	NaN	81	60	90	81	86.5	101	79	NaN	83.8125	NaN	1017.57	936.942	980.553	985.832	1055.77	NaN	1111	1140.11	NaN	1032.54	1112.69	NaN	1017.57	936.942	1014.16	916.111	1055.77	NaN	1144.05	1110.77	NaN	1038.51	NaN	NaN	0	0
Z5-E188	79	91	79	53	82	71	72.5	84	65	NaN	75.1667	79	91	77.5	53	81	71	72.5	83	63	NaN	74.5556	881.611	981.875	867.5	897.774	818.611	891.884	920	909.721	870.611	NaN	893.287	900.3	881.611	957.678	843.884	897.774	805.274	891.884	904.721	909.721	829.721	NaN	882.257	0	0	24.1947	23.6106
Z5-E189	94	106	76.5	59	90	72	77.5	92	73	NaN	82.2222	92	106	74.5	60	89	73	76.5	90	70	NaN	81.2222	964.803	939.346	913.053	997.221	916.111	910.024	936.111	987.134	993.192	NaN	950.777	1112.69	964.803	903.805	913.053	1014.16	904.163	927.832	920	969.942	939.442	NaN	956.989	27.16	0	35.5408	0
Z5-E190	86	107	78.5	57	82	73	73.5	84	67	NaN	78.6667	86	97	77.5	NaN	81	73	73.5	85	66	NaN	79.875	NaN	974.666	925.553	964.442	818.611	927.832	959.721	924.303	895.134	NaN	923.783	1019.75	NaN	957.678	913.053	NaN	805.274	927.832	936.111	924.303	883.413	NaN	920.927	0	NaN	16.9856	12.5
Z5-E191	NaN	NaN	86.5	63	107	82	NaN	NaN	77	NaN	83.1	94	NaN	84.5	63	105	80	NaN	NaN	76	NaN	83.75	NaN	1112.32	936.942	1059.16	1005.27	1071.8	951.942	NaN	1074.5	NaN	1030.28	1139.86	NaN	1076.39	936.942	1059.16	1005.27	1037.41	951.942	NaN	1054.25	NaN	1032.65	NaN	NaN	35.9278	0
Z5-E192	NaN	109	78.5	58	97	74	82.5	NaN	NaN	79	82.5714	NaN	108	78.5	NaN	94	76	80.5	NaN	NaN	78	85.8333	964.803	975.442	857.221	980.553	985.832	944.053	904.721	1075.08	NaN	1028.72	968.492	NaN	964.803	975.442	843.884	NaN	961.111	970.611	904.721	1037.61	NaN	1011.52	958.713	NaN	0	0	13.3317
Z5-E193	82	91	74.5	56	85	72	73.5	87	69	NaN	76.6667	81	90	74	57	82	72	73.5	87	68	NaN	76.0556	881.611	903.805	893.611	948.611	856.384	910.024	879.442	924.303	922.524	NaN	902.257	931.22	870.553	894.361	884.442	964.442	818.611	910.024	879.442	924.303	908.332	NaN	898.573	16.8	11.0528	9.44222	9.16334
Z5-E194	86	100	79.5	60	83	73	76.5	NaN	67	NaN	78.125	84	99	78	60	80	70	73.5	NaN	65	NaN	76.1875	964.803	993.094	1016.94	1014.16	828.611	927.832	936.111	969.942	895.134	NaN	949.626	982.77	954.024	966.303	990.274	1014.16	788.332	873.553	904.721	924.303	870.611	NaN	926.905	36.97	10.7739	26.7883	26.6633
Z5-E195	78	92	76.5	58	89	74	77.5	86	74	NaN	78.3333	78	90	75.5	58	82	72	76.5	84	74	NaN	76.6667	896.413	939.75	962.221	980.553	904.163	944.053	891.663	987.134	1012.58	NaN	946.504	885	870.553	921.166	901.663	980.553	818.611	910.024	920	969.942	1012.58	NaN	919.009	0	25.8606	18.5792	60.5528
Z5-E196	86	103	80.5	59	88	72	75.5	87	75	NaN	80.6667	84	100	78.5	58	83	73	74.5	87	75	NaN	79.2222	964.803	1008.38	NaN	997.221	896.111	910.024	891.663	953	1032.72	NaN	956.74	982.77	964.803	975.442	901.663	980.553	828.611	927.832	891.663	937.971	1032.72	NaN	942.403	36.97	0	32.9303	NaN
Z5-E197	92	NaN	77	57	99	75	75.5	90	73	NaN	79.8125	90	106	77	57	92	76	76.5	88	73	NaN	81.7222	NaN	948.942	885.274	964.442	1000.27	956.884	854.163	953	993.192	NaN	944.522	1054.13	964.803	948.486	885.274	964.442	938.884	970.611	854.163	969.942	993.192	NaN	954.393	58.55	NaN	0.456668	0
Z5-E198	83	NaN	77	59	94	72	75.5	90	76	NaN	78.3125	84	NaN	75.5	59	88	72	73.5	89	74	NaN	76.875	NaN	947.957	893.611	997.221	961.111	910.024	891.663	953	1054.25	NaN	951.105	982.77	NaN	921.192	880.274	997.221	896.111	910.024	891.663	924.303	1012.58	NaN	935.127	-17.69	NaN	26.7619	13.3317
Z5-E199	88	NaN	78.5	57	93	75	78.5	96	71	NaN	79.625	84	104	78	55	86	75	75.5	92	69	NaN	79.8333	NaN	974.637	893.611	964.442	949.163	956.884	920	1005.19	958.471	NaN	952.8	982.77	964.803	966.137	893.611	931.111	870.274	956.884	920	953	922.524	NaN	936.111	71.36	NaN	8.5	0
Z5-E200	83	97	78	57	92	72	73.5	NaN	70	NaN	77.8125	84	97	78.5	59	91	73	75.5	NaN	68	NaN	78.25	936.942	966.25	948.884	964.442	938.884	910.024	904.721	924.303	939.442	NaN	937.099	982.77	936.942	975.442	913.053	997.221	930.832	927.832	904.721	953	908.332	NaN	943.014	-17.69	0	-9.19222	35.8317
Z5-E201	79.9	93	74	NaN	82.875	71.3	70.7	82.1	64.8	66.6667	76.1491	79.4545	92.0833	72.9	NaN	81.375	70	70.6	81.7	64	66.3333	75.3829	894.15	895.24	905.915	942.251	827.81	897.377	893.386	885.052	863.487	840.609	884.528	908.044	876.055	875.659	895.081	941.387	806.874	874.026	890.859	883.794	849.876	837.082	876.249	6.888	18.0922	19.5795	10.8327
Z5-E202	NaN	NaN	89.4	62.2	NaN	87.3	NaN	85	NaN	87	82.18	95.6667	NaN	87.75	NaN	NaN	85.4	NaN	85	NaN	84	87.5633	NaN	1160.18	975.305	1046.78	1005.27	1144.27	990.748	1162.05	1194.14	1179.02	1095.31	1162.83	NaN	1131.13	961.695	1040.55	1000.27	1116.54	970.109	1154.85	1154.48	1123.15	1081.56	NaN	NaN	29.0471	13.6094
Z24-E1	74	NaN	83	60	83	73	75.5	86	NaN	65	74.9375	74	NaN	76	NaN	76	67	68.5	80	NaN	62	71.9286	NaN	NaN	1016.94	1014.16	828.611	927.832	904.721	953	NaN	821.692	923.852	835.86	NaN	930.721	976.663	NaN	736.942	821.25	815	855.134	NaN	784.692	844.533	0	NaN	NaN	40.2739
Z24-E2	72	84	71	56	75	64	64.5	78	NaN	61	69.5	72	83	71	NaN	74	66	62.5	77	NaN	61	70.8125	778.553	840.774	880.274	948.611	724.163	778.25	NaN	811.134	NaN	767.274	816.129	803.63	765	840.774	885.274	NaN	712.774	805.611	NaN	789.163	NaN	767.274	796.187	0	13.5528	0	-5
Z24-E3	71	NaN	71	57	77	64	65.5	NaN	NaN	60	66.5	71	NaN	69	NaN	72	64	63.5	NaN	NaN	59	66.4167	NaN	840.774	843.884	964.442	748.332	778.25	NaN	821.611	NaN	750.361	821.093	786.38	NaN	810.663	829.163	NaN	684.721	778.25	NaN	801.413	NaN	734.663	775.036	0	NaN	30.1106	14.7211
Z24-E4	80	93	79	59	85	72	73.5	84	NaN	66	76.8333	75	86	75	58	81	69	70.5	83	NaN	63	73.3889	904.774	984.634	1053.05	997.221	856.384	910.024	841.111	924.303	NaN	831.942	922.605	848.05	812.582	913.25	1053.05	980.553	805.274	856.5	827.774	882.274	NaN	798.884	877.819	67.13	92.1922	71.3844	0
Z24-E5	72	86	74	57	75	68	67.5	79	NaN	62	71.1667	72	85	71	56	73	68	63.5	75	NaN	62	69.5	812.582	894.361	843.884	964.442	724.163	839	NaN	843.384	NaN	784.692	838.314	803.63	793.884	840.774	815.274	948.611	698.053	839	NaN	801.413	NaN	784.692	813.926	0	18.6922	53.5817	28.6106
Z24-E6	72	84	82	62	79	67	73.5	85	NaN	64	74.2778	72	80	78	NaN	77	66	67.5	84	NaN	62	73.3125	778.553	NaN	925.553	1043.61	772.5	821.25	NaN	924.303	NaN	811.111	868.126	803.63	720.832	NaN	885.274	NaN	748.332	805.611	NaN	843.384	NaN	784.692	798.822	0	57.7211	NaN	40.2739
Z24-E7	75	90	74	61	84	68	69.5	NaN	NaN	62	72.9375	75	88	72	61	79	68	70.5	NaN	NaN	62	71.9375	870.553	894.361	901.663	1028.33	841.663	839	NaN	868.692	NaN	784.692	878.62	848.05	847.053	857.861	893.611	1028.33	772.5	839	NaN	882.274	NaN	784.692	861.486	0	23.5	36.5	8.05278
Z24-E8	71	86	76	59	76	68	65.5	77	NaN	61	71.0556	71	86	76	59	74	65	63.5	75	NaN	61	70.0556	812.582	930.721	880.274	997.221	736.942	839	879.442	821.611	NaN	767.274	851.674	786.38	812.582	930.721	NaN	997.221	712.774	791.832	841.111	801.413	NaN	767.274	826.812	0	0	0	NaN
Z24-E9	75	NaN	80	60	75	67	64.5	74	NaN	60	69.4375	75	NaN	80	59	74	66	61.5	70	NaN	59	68.0625	NaN	1001.55	874.442	1014.16	724.163	821.25	866.663	811.134	NaN	750.361	857.966	848.05	NaN	1001.55	NaN	997.221	712.774	805.611	841.111	774.942	NaN	734.663	839.491	0	NaN	0	NaN
Z24-E10	71	86	74	55	78	66	65.5	76	NaN	62	70.3889	71	88	72	NaN	72	66	62.5	73	NaN	59	70.4375	812.582	894.361	884.442	931.111	759.163	805.611	NaN	821.611	NaN	784.692	836.696	786.38	847.053	857.861	843.884	NaN	684.721	805.611	NaN	789.163	NaN	734.663	793.667	0	-34.4711	36.5	40.5528
Z24-E11	72	86	71	59	78	68	67.5	81	NaN	65	71.9444	72	85	72	NaN	76	68	65.5	78	NaN	62	72.3125	812.582	840.774	874.442	997.221	759.163	839	NaN	843.384	NaN	821.692	848.532	803.63	793.884	857.861	901.663	NaN	736.942	839	NaN	821.611	NaN	784.692	817.41	0	18.6922	-17.0817	-27.2211
Z24-E12	75	90	70	55	74	69	67.5	78	NaN	60	70.9444	75	88	71	55	72	66	64.5	77	NaN	60	69.8333	870.553	824.884	829.163	931.111	712.774	856.5	NaN	843.384	NaN	750.361	827.341	848.05	847.053	840.774	829.163	931.111	684.721	805.611	NaN	811.134	NaN	750.361	816.442	0	23.5	-15.8844	0
Z24-E13	74	90	82	60	77	66	65.5	79	NaN	62	72.8333	74	88	80	60	76	67	63.5	78	NaN	62	72.0556	870.553	1036.08	880.274	1014.16	748.332	805.611	NaN	821.611	NaN	784.692	870.165	835.86	847.053	1001.55	880.274	1014.16	736.942	821.25	NaN	801.413	NaN	784.692	858.133	0	23.5	34.5239	0
Z24-E14	75	85	76	59	75	69	67.5	78	NaN	63	71.9444	75	85	75	NaN	74	68	68.5	75	NaN	61	72.6875	793.884	930.721	936.942	997.221	724.163	856.5	NaN	843.384	NaN	798.884	860.213	848.05	793.884	913.25	NaN	NaN	712.774	839	NaN	855.134	NaN	767.274	818.481	0	0	17.4711	NaN
Z24-E15	75	91	76	62	81	71	68.5	81	NaN	64	74.3889	75	90	74	64	81	70	69.5	80	NaN	64	74.1667	881.611	930.721	913.053	1043.61	805.274	891.884	NaN	855.134	NaN	811.111	891.55	848.05	870.553	894.361	925.553	1074.44	805.274	873.553	NaN	868.692	NaN	811.111	885.732	0	11.0528	36.3606	-12.5
Z24-E16	76	90	72	58	76	66	65.5	77	NaN	62	71.3889	76	88	71	NaN	73	65	63.5	75	NaN	61	71.5625	870.553	857.861	843.884	980.553	736.942	805.611	806.111	821.611	NaN	784.692	834.202	859.38	847.053	840.774	843.884	NaN	698.053	791.832	815	801.413	NaN	767.274	807.185	0	23.5	17.0817	0
Z24-E17	70	88	68	57	73	63	65.5	76	NaN	59	68.8333	70	87	69	56	72	63	63.5	75	NaN	59	68.2778	847.053	798.5	874.442	964.442	698.053	766.361	NaN	821.611	NaN	734.663	813.141	770.16	832.163	810.663	884.442	948.611	684.721	766.361	NaN	801.413	NaN	734.663	803.689	0	14.8844	-12.1633	-10
Z24-E18	75	90	76	61	81	72	68.5	NaN	NaN	64	73.4375	75	88	74	NaN	77	69	68.5	NaN	NaN	62	73.3571	870.553	930.721	925.553	1028.33	805.274	910.024	NaN	855.134	NaN	811.111	892.088	848.05	847.053	894.361	901.663	NaN	748.332	856.5	NaN	855.134	NaN	784.692	841.973	0	23.5	36.3606	23.8844
Z24-E19	80	90	74	61	82	69	73.5	86	NaN	66	75.7222	78	85	71	NaN	78	68	66.5	84	NaN	65	74.4375	870.553	894.361	962.221	1028.33	818.611	856.5	NaN	924.303	NaN	831.942	898.353	885	793.884	840.774	893.611	NaN	759.163	839	NaN	831.803	NaN	821.692	833.116	30.19	76.6633	53.5817	68.6106
Z24-E20	77	86	74	65	77	70	68.5	81	NaN	67	73.9444	79	86	72	65	77	70	67.5	80	NaN	66	73.6111	812.582	894.361	885.274	1090	748.332	873.553	NaN	855.134	NaN	843.692	875.366	900.3	812.582	857.861	885.274	1090	748.332	873.553	NaN	843.384	NaN	831.942	871.47	-28.69	0	36.5	0
Z24-E21	75	95	80	61	85	73	73.5	81	NaN	68	76.8333	75	92	79	NaN	81	70	71.5	78	NaN	67	76.6875	924.111	1001.55	948.884	1028.33	856.384	927.832	NaN	924.303	NaN	856.442	933.48	848.05	896.413	984.634	913.053	NaN	805.274	873.553	NaN	895.524	NaN	843.692	882.524	0	27.6922	16.9133	35.8317
Z24-E22	74	84	73	55	73	68	64.5	75	NaN	60	69.6111	74	83	71	NaN	72	65	62.5	73	NaN	59	69.9375	778.553	876.134	765	931.111	698.053	839	NaN	811.134	NaN	750.361	806.168	835.86	765	840.774	754.442	NaN	684.721	791.832	NaN	789.163	NaN	734.663	774.557	0	13.5528	35.3606	10.5528
Z24-E23	72	87	77	59	82	68	67.5	77	NaN	61	72.2778	72	85	73	57	73	66	65.5	74	NaN	59	69.3889	832.163	947.971	874.442	997.221	818.611	839	NaN	843.384	NaN	767.274	865.008	803.63	793.884	876.134	829.163	964.442	698.053	805.611	NaN	821.611	NaN	734.663	814.132	0	38.2739	71.8317	45.2739
Z24-E24	75	86	71	55	78	70	68.5	78	NaN	63	71.6111	75	84	70	NaN	75	68	67.5	76	NaN	63	72.3125	812.582	840.774	880.274	931.111	759.163	873.553	NaN	855.134	NaN	798.884	843.934	848.05	778.553	824.884	NaN	NaN	724.163	839	NaN	843.384	NaN	798.884	808.131	0	34.0239	15.8844	NaN
Z24-E25	72	81	74	57	72	68	65.5	78	NaN	63	70.0556	72	81	71	57	71	67	63.5	77	NaN	62	69.0556	736.721	894.361	948.884	964.442	684.721	839	NaN	821.611	NaN	798.884	836.078	803.63	736.721	840.774	936.942	964.442	675.274	821.25	NaN	801.413	NaN	784.692	818.349	0	0	53.5817	11.9422
Z24-E26	83	105	83	68	97	75	75.5	90	NaN	72	83.1667	81	104	82	68	89	75	72.5	87	NaN	69	80.8333	964.803	1050.5	962.221	1136.66	985.832	956.884	NaN	953	NaN	917.5	990.925	931.22	964.803	1036.08	936.942	1136.66	904.163	956.884	NaN	909.721	NaN	870.111	960.732	33.86	0	14.4133	25.2739
Z24-E27	80	87	75	57	81	68	72.5	82	NaN	67	74.3889	75	85	72	57	79	66	69.5	76	NaN	64	71.5	832.163	913.25	NaN	964.442	805.274	839	NaN	909.721	NaN	843.692	872.506	848.05	793.884	857.861	NaN	964.442	772.5	805.611	NaN	868.692	NaN	811.111	840.269	67.13	38.2739	55.3844	NaN
Z24-E28	79	NaN	74	59	76	66	70.5	78	NaN	64	70.8125	75	NaN	77	NaN	75	68	69.5	77	NaN	65	72.3571	NaN	894.361	843.884	997.221	736.942	805.611	NaN	882.274	NaN	811.111	853.058	848.05	NaN	947.971	843.884	NaN	724.163	839	NaN	868.692	NaN	821.692	841.922	52.25	NaN	-53.6106	0
Z24-E29	75	89	71	59	77	66	67.5	77	NaN	63	71.6111	75	87	71	NaN	76	67	65.5	80	NaN	62	72.9375	860.192	840.774	NaN	997.221	748.332	805.611	854.163	843.384	NaN	798.884	843.57	848.05	832.163	840.774	NaN	NaN	736.942	821.25	854.163	821.611	NaN	784.692	817.456	0	28.0239	0	NaN
Z24-E30	70	84	72	58	76	69	67.5	79	NaN	63	70.9444	70	86	71	NaN	75	67	67.5	78	NaN	63	72.1875	778.553	857.861	893.611	980.553	736.942	856.5	NaN	843.384	NaN	798.884	843.286	770.16	812.582	840.774	857.221	NaN	724.163	821.25	NaN	843.384	NaN	798.884	808.552	0	-34.0239	17.0817	36.3844
Z24-E31	70	83	67	54	73	65	65.5	75	NaN	61	68.1667	70	81	68	NaN	70	63	62.5	73	NaN	59	68.3125	765	787.134	829.163	914.163	698.053	791.832	NaN	821.611	NaN	767.274	796.779	770.16	736.721	798.5	815.274	NaN	667.5	766.361	NaN	789.163	NaN	734.663	759.793	0	28.2739	-11.3606	13.8844
Z24-E32	72	86	76	56	75	64	67.5	81	NaN	62	71.0556	72	85	72	55	72	65	65.5	80	NaN	59	69.5	812.582	930.721	867.5	948.611	724.163	778.25	NaN	843.384	NaN	784.692	836.238	803.63	793.884	857.861	815.274	931.111	684.721	791.832	NaN	821.611	NaN	734.663	803.843	0	18.6922	72.8606	52.2211
Z24-E33	80	86	77	59	79	71	72.5	80	NaN	63	74.1667	80	86	76	58	77	69	68.5	79	NaN	64	73.0556	812.582	947.971	NaN	997.221	772.5	891.884	879.442	909.721	NaN	798.884	876.276	915.19	812.582	930.721	NaN	980.553	748.332	856.5	879.442	855.134	NaN	811.111	865.507	0	0	17.25	NaN
Z24-E34	71	NaN	73	57	71	67	65.5	82	NaN	59	68.1875	71	NaN	70	57	69	64	63.5	78	NaN	57	66.1875	NaN	876.134	874.442	964.442	675.274	821.25	866.663	821.611	NaN	734.663	829.31	786.38	NaN	824.884	843.884	964.442	658.332	778.25	854.163	801.413	NaN	706.5	802.028	0	NaN	51.25	30.5528
Z24-E35	75	90	76	60	77	68	67.5	82	NaN	63	73.1667	75	85	72	59	72	66	66.5	77	NaN	61	70.3889	870.553	930.721	874.442	1014.16	748.332	839	NaN	843.384	NaN	798.884	864.935	848.05	793.884	857.861	874.442	997.221	684.721	805.611	NaN	831.803	NaN	767.274	828.985	0	76.6633	72.8606	0
Z24-E36	75	93	77	NaN	85	69	70.5	81	NaN	67	77.1875	75	90	74	NaN	81	68	68.5	84	NaN	64	75.5625	904.774	947.971	976.663	NaN	856.384	856.5	NaN	882.274	NaN	843.692	895.466	848.05	870.553	894.361	976.663	NaN	805.274	839	NaN	855.134	NaN	811.111	862.518	0	34.2211	53.6106	0
Z24-E37	78	88	74	60	76	69	68.5	79	NaN	62	72.7222	75	88	73	58	74	66	67.5	75	NaN	60	70.7222	847.053	894.361	867.5	1014.16	736.942	856.5	854.163	855.134	NaN	784.692	856.723	848.05	847.053	876.134	789.163	980.553	712.774	805.611	806.111	843.384	NaN	750.361	825.919	36.94	0	18.2211	78.3317
Z24-E38	80	85	73	61	77	70	72.5	79	NaN	63	73.3889	75	84	72	62	76	69	70.5	77	NaN	63	72.0556	793.884	876.134	893.611	1028.33	748.332	873.553	841.111	909.721	NaN	798.884	862.618	848.05	778.553	857.861	NaN	1043.61	736.942	856.5	854.163	882.274	NaN	798.884	850.76	67.13	15.3317	18.2739	NaN
Z24-E39	80	90	91	64	80	74	73.5	83	NaN	68	78.1667	78	88	79	NaN	76	70	70.5	81	NaN	68	76.3125	870.553	NaN	880.274	1074.44	788.332	944.053	NaN	924.303	NaN	856.442	905.485	885	847.053	984.634	874.442	NaN	736.942	873.553	NaN	882.274	NaN	856.442	867.543	30.19	23.5	NaN	5.83167
Z24-E40	71	83	74	58	76	69	65.5	75	NaN	61	70.2778	71	83	74	NaN	75	67	63.5	74	NaN	60	70.9375	765	894.361	867.5	980.553	736.942	856.5	NaN	821.611	NaN	767.274	836.218	786.38	765	894.361	874.442	NaN	724.163	821.25	NaN	801.413	NaN	750.361	802.171	0	0	0	-6.94222
Z24-E41	72	87	73	59	84	71	73.5	83	NaN	67	74.3889	72	85	71	58	80	69	69.5	79	NaN	64	71.9444	832.163	876.134	962.221	997.221	841.663	891.884	NaN	924.303	NaN	843.692	896.16	803.63	793.884	840.774	936.942	980.553	788.332	856.5	NaN	868.692	NaN	811.111	853.38	0	38.2739	35.3606	25.2739
Z24-E42	70	83	70	58	74	65	69.5	75	NaN	62	69.6111	70	83	69	NaN	72	63	64.5	74	NaN	61	69.5625	765	824.884	NaN	980.553	712.774	791.832	NaN	868.692	NaN	784.692	818.347	770.16	765	810.663	NaN	NaN	684.721	766.361	NaN	811.134	NaN	767.274	767.902	0	0	14.2211	NaN
Z24-E43	74	95	76	60	NaN	68	68.5	81	NaN	62	73.0625	74	92	75	60	72	66	67.5	78	NaN	61	71.7222	924.111	930.721	901.663	1014.16	NaN	839	NaN	855.134	NaN	784.692	892.784	835.86	896.413	913.25	874.442	1014.16	684.721	805.611	NaN	843.384	NaN	767.274	848.347	0	27.6922	17.4711	27.2211
Z24-E44	75	NaN	76	62	76	66	65.5	77	NaN	62	69.9375	75	NaN	71	60	72	63	62.5	72	NaN	59	66.8125	NaN	930.721	893.611	1043.61	736.942	805.611	NaN	821.611	NaN	784.692	859.543	848.05	NaN	840.774	880.274	1014.16	684.721	766.361	NaN	789.163	NaN	734.663	819.771	0	NaN	89.9422	13.3317
Z24-E45	74	85	69	58	78	64	65.5	79	NaN	59	70.1667	74	83	69	54	76	64	63.5	76	NaN	58	68.6111	793.884	810.663	901.663	980.553	759.163	778.25	NaN	821.611	NaN	734.663	822.556	835.86	765	810.663	874.442	914.163	736.942	778.25	NaN	801.413	NaN	719.5	804.026	0	28.8844	0	27.2211
Z24-E46	72	NaN	78	60	76	68	65.5	78	NaN	62	69.9375	72	NaN	75	NaN	73	66	63.5	75	NaN	62	69.5	NaN	966.25	874.442	1014.16	736.942	839	NaN	821.611	NaN	784.692	862.443	803.63	NaN	913.25	NaN	NaN	698.053	805.611	NaN	801.413	NaN	784.692	801.108	0	NaN	53	NaN
Z24-E47	72	88	74	55	77	65	65.5	78	NaN	62	70.7222	72	88	72	54	76	65	63.5	77	NaN	61	69.8333	847.053	894.361	829.163	931.111	748.332	791.832	815	821.611	NaN	784.692	829.239	803.63	847.053	857.861	829.163	914.163	736.942	791.832	827.774	801.413	NaN	767.274	817.711	0	0	36.5	0
Z24-E48	71	81	68	58	70	63	64.5	73	NaN	59	67.5	71	80	74	NaN	68	62	61.5	69	NaN	57	67.8125	736.721	798.5	765	980.553	667.5	766.361	797.5	811.134	NaN	734.663	784.215	786.38	720.832	894.361	801.384	NaN	651.111	751.971	806.111	774.942	NaN	706.5	765.955	0	15.8844	-95.8606	-36.3844
Z24-E49	78	NaN	70	56	76	68	67.5	80	NaN	62	69.6875	74	NaN	68	NaN	73	68	64.5	76	NaN	59	68.9286	NaN	824.884	880.274	948.611	736.942	839	NaN	843.384	NaN	784.692	836.827	835.86	NaN	798.5	857.221	NaN	698.053	839	NaN	811.134	NaN	734.663	796.347	49.13	NaN	26.3844	23.0528
Z24-E50	74	87	68	56	77	64	65.5	79	NaN	62	70.2778	74	87	69	57	74	66	63.5	78	NaN	62	70.0556	832.163	798.5	867.5	948.611	748.332	778.25	NaN	821.611	NaN	784.692	822.457	835.86	832.163	810.663	884.442	964.442	712.774	805.611	NaN	801.413	NaN	784.692	825.785	0	0	-12.1633	-16.9422
Z24-E51	72	85	80	58	73	66	65.5	74	NaN	60	70.3889	72	82	78	NaN	70	63	62.5	72	NaN	59	69.8125	793.884	1001.55	815.274	980.553	698.053	805.611	NaN	821.611	NaN	750.361	833.362	803.63	750.384	966.25	829.163	NaN	667.5	766.361	NaN	789.163	NaN	734.663	788.389	0	43.5	35.3028	-13.8844
Z24-E52	80	98	74	61	81	71	73.5	86	NaN	65	76.6111	78	93	74	61	81	71	73.5	85	NaN	67	75.9444	944.111	894.361	913.053	1028.33	805.274	891.884	NaN	924.303	NaN	821.692	902.876	885	904.774	894.361	893.611	1028.33	805.274	891.884	NaN	924.303	NaN	843.692	896.803	30.19	39.3317	0	19.4422
Z24-E53	74	90	73	60	72	62	65.5	78	NaN	59	70.3889	74	89	70	NaN	67	61	62.5	75	NaN	57	69.4375	870.553	876.134	885.274	1014.16	684.721	751.971	NaN	821.611	NaN	734.663	829.886	835.86	860.192	824.884	874.442	NaN	645.832	735.832	NaN	789.163	NaN	706.5	784.088	0	10.3606	51.25	10.8317
Z24-E54	71	85	77	60	76	68	67.5	78	NaN	61	71.5	71	83	76	58	72	63	64.5	75	NaN	59	69.0556	793.884	947.971	976.663	1014.16	736.942	839	NaN	843.384	NaN	767.274	864.91	786.38	765	930.721	962.221	980.553	684.721	766.361	NaN	811.134	NaN	734.663	824.639	0	28.8844	17.25	14.4422
Z24-E55	71	90	75	61	77	66	65.5	NaN	NaN	63	71.0625	71	90	74	NaN	71	64	63.5	77	NaN	62	71.5625	870.553	913.25	874.442	1028.33	748.332	805.611	NaN	821.611	NaN	798.884	857.627	786.38	870.553	894.361	857.221	NaN	675.274	778.25	NaN	801.413	NaN	784.692	806.018	0	0	18.8844	17.2211
Z24-E56	71	88	76	59	81	68	64.5	76	NaN	63	71.8333	71	86	75	NaN	77	67	62.5	74	NaN	62	71.8125	847.053	930.721	789.163	997.221	805.274	839	854.163	811.134	NaN	798.884	852.513	786.38	812.582	913.25	765	NaN	748.332	821.25	815	789.163	NaN	784.692	803.961	0	34.4711	17.4711	24.1633
Z24-E57	72	85	72	55	76	63	67.5	76	NaN	57	69.2778	72	83	71	54	75	66	65.5	74	NaN	57	68.6111	793.884	857.861	874.442	931.111	736.942	766.361	NaN	843.384	NaN	706.5	813.811	803.63	765	840.774	NaN	914.163	724.163	805.611	NaN	821.611	NaN	706.5	797.681	0	28.8844	17.0817	NaN
Z24-E58	73	82	74	59	72	62	65.5	76	NaN	59	69.1667	73	80	72	58	70	62	63.5	72	NaN	58	67.6111	750.384	894.361	893.611	997.221	684.721	751.971	NaN	821.611	NaN	734.663	816.068	820.91	720.832	857.861	857.221	980.553	667.5	751.971	NaN	801.413	NaN	719.5	797.529	0	29.5528	36.5	36.3844
Z24-E59	73	85	74	54	72	62	64.5	72	NaN	57	68.1667	73	83	70	54	70	62	61.5	71	NaN	57	66.8333	793.884	894.361	815.274	914.163	684.721	751.971	NaN	811.134	NaN	706.5	796.501	820.91	765	824.884	815.274	914.163	667.5	751.971	NaN	774.942	NaN	706.5	782.349	0	28.8844	69.4711	0
Z24-E60	78	NaN	78	59	86	73	70.5	85	NaN	67	74.5625	78	NaN	76	59	81	70	68.5	83	NaN	66	72.6875	NaN	966.25	936.942	997.221	870.274	927.832	NaN	882.274	NaN	843.692	917.784	885	NaN	930.721	880.274	997.221	805.274	873.553	NaN	855.134	NaN	831.942	882.39	0	NaN	35.5239	56.6633
Z24-E61	73	NaN	79	62	80	69	65.5	81	NaN	63	71.5625	73	NaN	79	61	78	67	63.5	77	NaN	60	69.8125	NaN	984.634	867.5	1043.61	788.332	856.5	NaN	821.611	NaN	798.884	880.153	820.91	NaN	NaN	NaN	1028.33	759.163	821.25	NaN	801.413	NaN	750.361	830.238	0	NaN	NaN	NaN
Z24-E62	72	84	68	57	72	69	65.5	76	NaN	62	69.5	72	83	68	NaN	70	65	63.5	74	NaN	61	69.5625	778.553	798.5	874.442	964.442	684.721	856.5	NaN	821.611	NaN	784.692	820.433	803.63	765	798.5	867.5	NaN	667.5	791.832	NaN	801.413	NaN	767.274	782.831	0	13.5528	0	6.94222
Z24-E63	72	83	70	54	74	64	64.5	76	NaN	60	68.6111	72	80	69	52	72	63	62.5	74	NaN	59	67.0556	765	824.884	789.163	914.163	712.774	778.25	797.5	811.134	NaN	750.361	793.692	803.63	720.832	810.663	754.442	882.221	684.721	766.361	771.663	789.163	NaN	734.663	771.836	0	44.1633	14.2211	34.7211
Z24-E64	72	91	74	52	73	64	65.5	76	NaN	61	69.8333	72	89	69	52	69	64	63.5	73	NaN	60	67.9444	881.611	894.361	765	882.221	698.053	778.25	NaN	821.611	NaN	767.274	811.047	803.63	860.192	810.663	765	882.221	658.332	778.25	NaN	801.413	NaN	750.361	790.007	0	21.4133	83.6922	0
Z24-E65	72	81	67	57	74	64	65.5	77	NaN	61	68.7222	72	80	66	NaN	71	62	63.5	75	NaN	58	68.4375	736.721	787.134	884.442	964.442	712.774	778.25	NaN	821.611	NaN	767.274	806.581	803.63	720.832	776.082	874.442	NaN	675.274	751.971	NaN	801.413	NaN	719.5	765.393	0	15.8844	11.0528	10
Z24-E66	77	88	77	61	80	69	72.5	83	NaN	64	74.6111	75	86	75	NaN	79	69	69.5	82	NaN	64	74.9375	847.053	947.971	880.274	1028.33	788.332	856.5	854.163	909.721	NaN	811.111	880.384	848.05	812.582	913.25	NaN	NaN	772.5	856.5	854.163	868.692	NaN	811.111	842.106	23.55	34.4711	34.7211	NaN
Z24-E67	71	NaN	73	53	76	64	65.5	78	NaN	60	67.5625	71	NaN	69	52	72	62	62.5	75	NaN	59	65.3125	NaN	876.134	789.163	897.774	736.942	778.25	NaN	821.611	NaN	750.361	807.176	786.38	NaN	810.663	801.384	882.221	684.721	751.971	NaN	789.163	NaN	734.663	780.146	0	NaN	65.4711	-12.2211
Z24-E68	71	87	72	54	73	62	67.5	76	NaN	60	69.1667	71	85	71	53	72	62	65.5	75	NaN	58	68.0556	832.163	857.861	829.163	914.163	698.053	751.971	NaN	843.384	NaN	750.361	809.64	786.38	793.884	840.774	829.163	897.774	684.721	751.971	NaN	821.611	NaN	719.5	791.753	0	38.2739	17.0817	0
Z24-E69	68	NaN	71	57	76	62	64.5	76	NaN	57	66.4375	68	NaN	68	58	72	62	61.5	75	NaN	57	65.1875	NaN	840.774	815.274	964.442	736.942	751.971	797.5	811.134	NaN	706.5	803.067	735.66	NaN	798.5	789.163	980.553	684.721	751.971	806.111	774.942	NaN	706.5	780.902	0	NaN	42.2739	26.1106
Z24-E70	73	88	68	61	77	68	65.5	80	NaN	62	71.3889	73	84	67	60	72	67	62.5	77	NaN	59	69.0556	847.053	798.5	893.611	1028.33	748.332	839	NaN	821.611	NaN	784.692	845.141	820.91	778.553	787.134	893.611	1014.16	684.721	821.25	NaN	789.163	NaN	734.663	813.797	0	68.5	11.3606	0
Z24-E71	71	NaN	67	52	71	64	63.5	74	NaN	62	65.5625	71	NaN	65	51	69	61	61.5	71	NaN	59	63.5625	NaN	787.134	789.163	882.221	675.274	778.25	NaN	801.413	NaN	784.692	785.45	786.38	NaN	764.471	741.942	865.274	658.332	735.832	NaN	774.942	NaN	734.663	757.73	0	NaN	22.6633	47.2211
Z24-E72	75	86	78	59	76	68	68.5	77	NaN	62	72.1667	75	85	78	59	74	67	67.5	75	NaN	62	71.3889	812.582	966.25	874.442	997.221	736.942	839	NaN	855.134	NaN	784.692	858.283	848.05	793.884	966.25	815.274	997.221	712.774	821.25	NaN	843.384	NaN	784.692	842.531	0	18.6922	0	59.1633
Z24-E73	72	84	76	61	75	67	66.5	76	NaN	60	70.8333	72	83	72	58	70	63	62.5	74	NaN	59	68.1667	778.553	930.721	867.5	1028.33	724.163	821.25	NaN	831.803	NaN	750.361	841.585	803.63	765	857.861	829.163	980.553	667.5	766.361	NaN	789.163	NaN	734.663	799.322	0	13.5528	72.8606	38.3317
Z24-E74	70	NaN	75	55	75	67	65.5	78	NaN	60	68.1875	70	NaN	72	54	72	64	63.5	74	NaN	58	65.9375	NaN	913.25	874.442	931.111	724.163	821.25	866.663	821.611	NaN	750.361	837.856	770.16	NaN	857.861	874.442	914.163	684.721	778.25	815	801.413	NaN	719.5	801.723	0	NaN	55.3844	0
Z24-E75	72	NaN	78	62	76	66	64.5	78	NaN	61	69.6875	72	NaN	77	61	72	63	62.5	75	NaN	59	67.6875	NaN	966.25	815.274	1043.61	736.942	805.611	NaN	811.134	NaN	767.274	849.442	803.63	NaN	947.971	789.163	1028.33	684.721	766.361	NaN	789.163	NaN	734.663	818.001	0	NaN	18.2739	26.1106
Z24-E76	71	84	75	56	76	64	67.5	76	NaN	62	70.1667	71	81	73	NaN	72	63	63.5	75	NaN	61	69.9375	778.553	913.25	829.163	948.611	736.942	778.25	NaN	843.384	NaN	784.692	826.606	786.38	736.721	876.134	815.274	NaN	684.721	766.361	NaN	801.413	NaN	767.274	779.285	0	41.8317	37.1106	13.8844
Z24-E77	72	84	69	58	78	67	65.5	78	NaN	60	70.1667	72	81	68	NaN	72	64	63.5	78	NaN	59	69.6875	778.553	810.663	815.274	980.553	759.163	821.25	866.663	821.611	NaN	750.361	822.677	803.63	736.721	798.5	801.384	NaN	684.721	778.25	806.111	801.413	NaN	734.663	771.71	0	41.8317	12.1633	13.8844
Z24-E78	70	83	68	54	72	63	65.5	70	NaN	59	67.1667	70	81	67	NaN	69	62	63.5	70	NaN	56	67.3125	765	798.5	789.163	914.163	684.721	766.361	NaN	821.611	NaN	734.663	784.273	770.16	736.721	787.134	765	NaN	658.332	751.971	NaN	801.413	NaN	693.884	745.577	0	28.2739	11.3606	24.1633
Z24-E79	70	NaN	73	57	73	63	64.5	77	NaN	59	67.0625	70	NaN	71	57	70	62	62.5	73	NaN	58	65.4375	NaN	876.134	765	964.442	698.053	766.361	NaN	811.134	NaN	734.663	802.255	770.16	NaN	840.774	754.442	964.442	667.5	751.971	NaN	789.163	NaN	719.5	782.244	0	NaN	35.3606	10.5528
Z24-E80	75	87	73	56	76	68	64.5	77	NaN	60	70.7222	75	84	71	NaN	74	66	62.5	75	NaN	60	70.9375	832.163	876.134	867.5	948.611	736.942	839	NaN	811.134	NaN	750.361	832.731	848.05	778.553	840.774	874.442	NaN	712.774	805.611	NaN	789.163	NaN	750.361	799.966	0	53.6106	35.3606	-6.94222
Z24-E81	74	86	69	55	74	66	NaN	79	NaN	61	70.5	74	86	68	NaN	72	66	NaN	77	NaN	61	72	812.582	810.663	765	931.111	712.774	805.611	815	NaN	NaN	767.274	802.502	835.86	812.582	798.5	789.163	NaN	684.721	805.611	827.774	NaN	NaN	767.274	790.186	0	0	12.1633	-24.1633
Z24-E82	71	85	73	54	75	63	64.5	75	NaN	61	69.0556	71	86	70	53	70	63	61.5	73	NaN	59	67.3889	793.884	876.134	829.163	914.163	724.163	766.361	827.774	811.134	NaN	767.274	812.228	786.38	812.582	824.884	NaN	897.774	667.5	766.361	815	774.942	NaN	734.663	786.676	0	-18.6922	51.25	NaN
Z24-E83	71	86	69	57	76	64	65.5	81	NaN	59	69.8333	71	85	65	56	73	64	62.5	73	NaN	58	67.5	812.582	810.663	815.274	964.442	736.942	778.25	NaN	821.611	NaN	734.663	809.303	786.38	793.884	764.471	857.221	948.611	698.053	778.25	NaN	789.163	NaN	719.5	792.837	0	18.6922	46.1922	-41.9422
Z24-E84	71	86	71	57	73	67	65.5	76	NaN	61	69.7222	71	86	70	54	69	67	63.5	72	NaN	59	67.9444	812.582	840.774	765	964.442	698.053	821.25	NaN	821.611	NaN	767.274	811.373	786.38	812.582	824.884	765	914.163	658.332	821.25	NaN	801.413	NaN	734.663	790.963	0	0	15.8844	0
Z24-E85	80	85	74	61	77	67	69.5	78	NaN	61	72.5	79	83	73	NaN	77	65	67.5	77	NaN	60	72.6875	793.884	894.361	NaN	1028.33	748.332	821.25	NaN	868.692	NaN	767.274	846.018	900.3	765	876.134	880.274	NaN	748.332	791.832	NaN	843.384	NaN	750.361	819.452	14.88	28.8844	18.2211	NaN
Z24-E86	73	81	68	55	77	66	64.5	73	NaN	60	68.6111	73	80	73	NaN	77	65	62.5	73	NaN	59	70.3125	736.721	798.5	789.163	931.111	748.332	805.611	NaN	811.134	NaN	750.361	796.367	820.91	720.832	876.134	815.274	NaN	748.332	791.832	NaN	789.163	NaN	734.663	787.143	0	15.8844	-77.6344	-26.1106
Z24-E87	79	93	76	58	79	69	70.5	82	NaN	68	74.9444	75	90	76	NaN	79	69	68.5	80	NaN	66	75.4375	904.774	930.721	880.274	980.553	772.5	856.5	866.663	882.274	NaN	856.442	881.189	848.05	870.553	930.721	893.611	NaN	772.5	856.5	879.442	855.134	NaN	831.942	859.828	52.25	34.2211	0	-13.3317
Z24-E88	75	85	73	59	74	66	65.5	78	NaN	63	70.9444	75	85	71	NaN	74	67	63.5	76	NaN	62	71.6875	793.884	876.134	880.274	997.221	712.774	805.611	NaN	821.611	NaN	798.884	835.799	848.05	793.884	840.774	874.442	NaN	712.774	821.25	NaN	801.413	NaN	784.692	809.66	0	0	35.3606	5.83167
Z24-E89	72	90	71	56	73	66	65.5	77	NaN	62	70.2778	72	86	71	56	72	65	63.5	75	NaN	63	69.2778	870.553	840.774	843.884	948.611	698.053	805.611	NaN	821.611	NaN	784.692	826.723	803.63	812.582	840.774	843.884	948.611	684.721	791.832	NaN	801.413	NaN	798.884	814.037	0	57.9711	0	0
Z24-E90	74	92	78	58	80	68	72.5	84	NaN	64	74.5	74	90	77	56	79	69	69.5	78	NaN	62	72.7222	896.413	966.25	NaN	980.553	788.332	839	959.721	909.721	NaN	811.111	893.888	835.86	870.553	947.971	NaN	948.611	772.5	856.5	879.442	868.692	NaN	784.692	862.758	0	25.8606	18.2739	NaN
Z24-E91	75	86	76	59	78	70	70.5	80	NaN	62	72.9444	75	83	73	NaN	75	67	67.5	77	NaN	62	72.4375	812.582	930.721	893.611	997.221	759.163	873.553	NaN	882.274	NaN	784.692	866.727	848.05	765	876.134	880.274	NaN	724.163	821.25	NaN	843.384	NaN	784.692	817.869	0	47.5817	54.5817	13.3317
Z24-E92	79	91	76	62	84	71	73.5	83	NaN	65	76.0556	81	94	76	62	80	70	71.5	84	NaN	67	76.1667	881.611	930.721	1029.44	1043.61	841.663	891.884	NaN	924.303	NaN	821.692	920.616	931.22	913.634	930.721	NaN	1043.61	788.332	873.553	NaN	895.524	NaN	843.692	902.536	-30.91	-32.0239	0	NaN
Z24-E93	73	92	74	58	80	71	66.5	77	NaN	64	72.8333	73	90	71	59	76	65	62.5	74	NaN	61	70.1667	896.413	894.361	893.611	980.553	788.332	891.884	NaN	831.803	NaN	811.111	873.508	820.91	870.553	840.774	885.274	997.221	736.942	791.832	NaN	789.163	NaN	767.274	833.327	0	25.8606	53.5817	8.33166
Z24-E94	71	NaN	72	54	81	68	65.5	74	NaN	58	67.9375	71	NaN	68	52	75	65	63.5	79	NaN	58	66.4375	NaN	857.861	NaN	914.163	805.274	839	NaN	821.611	NaN	719.5	826.235	786.38	NaN	798.5	NaN	882.221	724.163	791.832	NaN	801.413	NaN	719.5	786.287	0	NaN	59.3606	NaN
Z24-E95	72	88	79	58	74	68	64.5	78	NaN	NaN	72.6875	72	87	76	58	73	66	62.5	77	NaN	NaN	71.4375	847.053	984.634	789.163	980.553	712.774	839	NaN	811.134	NaN	NaN	852.045	803.63	832.163	930.721	815.274	980.553	698.053	805.611	NaN	789.163	NaN	NaN	831.896	0	14.8844	53.9133	-26.1106
Z24-E96	71	91	76	58	80	70	65.5	82	NaN	64	73.0556	71	90	72	57	77	67	62.5	79	NaN	62	70.8333	881.611	930.721	885.274	980.553	788.332	873.553	NaN	821.611	NaN	811.111	871.595	786.38	870.553	857.861	880.274	964.442	748.332	821.25	NaN	789.163	NaN	784.692	833.661	0	11.0528	72.8606	5
Z24-E97	71	83	71	54	72	64	64.5	75	NaN	57	67.9444	71	83	71	NaN	69	64	61.5	74	NaN	57	68.8125	765	840.774	765	914.163	684.721	778.25	NaN	811.134	NaN	706.5	783.193	786.38	765	840.774	815.274	NaN	658.332	778.25	NaN	774.942	NaN	706.5	765.681	0	0	0	-50.2739
Z24-E98	78	NaN	74	62	78	70	68.5	80	NaN	64	71.8125	74	NaN	73	61	75	69	67.5	78	NaN	62	69.9375	NaN	894.361	880.274	1043.61	759.163	873.553	963.884	855.134	NaN	811.111	885.136	835.86	NaN	876.134	874.442	1028.33	724.163	856.5	936.111	843.384	NaN	784.692	862.18	49.13	NaN	18.2211	5.83167
Z24-E99	74	86	71	57	78	72	65.5	80	NaN	62	71.7222	74	84	69	NaN	74	65	62.5	76	NaN	59	70.4375	812.582	840.774	NaN	964.442	759.163	910.024	936.111	821.611	NaN	784.692	853.675	835.86	778.553	810.663	NaN	NaN	712.774	791.832	879.442	789.163	NaN	734.663	791.619	0	34.0239	30.1106	NaN
Z24-E100	NaN	88	78	64	87	73	73.5	87	NaN	67	77.1875	NaN	88	76	61	80	69	67.5	85	NaN	66	74.0625	847.053	966.25	901.663	1074.44	883.332	927.832	NaN	924.303	NaN	843.692	921.071	NaN	847.053	930.721	880.274	1028.33	788.332	856.5	NaN	843.384	NaN	831.942	875.817	NaN	0	35.5239	21.3844
Z24-E101	75	86	72	59	78	69	67.5	80	NaN	62	72.0556	75	84	71	58	77	67	65.5	78	NaN	60	70.6111	812.582	857.861	893.611	997.221	759.163	856.5	NaN	843.384	NaN	784.692	850.627	848.05	778.553	840.774	880.274	980.553	748.332	821.25	NaN	821.611	NaN	750.361	829.973	0	34.0239	17.0817	13.3317
Z24-E102	77	88	68	60	77	64	66.5	79	NaN	63	71.3889	75	86	69	NaN	75	65	67.5	76	NaN	62	71.9375	847.053	798.5	880.274	1014.16	748.332	778.25	NaN	831.803	NaN	798.884	837.157	848.05	812.582	810.663	885.274	NaN	724.163	791.832	NaN	843.384	NaN	784.692	812.58	23.55	34.4711	-12.1633	-5
Z24-E103	71	83	73	58	71	62	64.5	75	NaN	60	68.6111	71	81	70	NaN	70	62	62.5	74	NaN	59	68.6875	765	876.134	829.163	980.553	675.274	751.971	NaN	811.134	NaN	750.361	804.949	786.38	736.721	824.884	857.221	NaN	667.5	751.971	NaN	789.163	NaN	734.663	768.563	0	28.2739	51.25	-28.0528
Z24-E104	71	83	74	53	73	64	64.5	79	NaN	59	68.9444	71	83	71	54	70	64	62.5	77	NaN	59	67.9444	765	894.361	874.442	897.774	698.053	778.25	NaN	811.134	NaN	734.663	806.71	786.38	765	840.774	874.442	914.163	667.5	778.25	NaN	789.163	NaN	734.663	794.482	0	0	53.5817	0
Z24-E105	70	99	78	62	79	70	67.5	86	NaN	64	75.0556	70	92	76	NaN	75	68	63.5	83	NaN	63	73.8125	NaN	966.25	874.442	1043.61	772.5	873.553	NaN	843.384	NaN	811.111	883.55	770.16	896.413	930.721	843.884	NaN	724.163	839	NaN	801.413	NaN	798.884	825.58	0	NaN	35.5239	30.5528
Z24-E106	81	88	76	59	81	68	67.5	83	NaN	63	74.0556	79	85	73	57	79	68	64.5	79	NaN	62	71.8333	847.053	930.721	880.274	997.221	805.274	839	NaN	843.384	NaN	798.884	867.726	900.3	793.884	876.134	880.274	964.442	772.5	839	NaN	811.134	NaN	784.692	846.929	30.91	53.1633	54.5817	0
Z24-E107	74	87	73	55	74	64	65.5	74	NaN	61	69.7222	74	84	71	NaN	71	64	62.5	73	NaN	59	69.8125	832.163	876.134	815.274	931.111	712.774	778.25	NaN	821.611	NaN	767.274	816.824	835.86	778.553	840.774	815.274	NaN	675.274	778.25	NaN	789.163	NaN	734.663	780.976	0	53.6106	35.3606	0
Z24-E108	72	84	76	55	72	66	65.5	76	NaN	61	69.7222	72	81	72	55	70	64	63.5	73	NaN	59	67.7222	778.553	930.721	885.274	931.111	684.721	805.611	NaN	821.611	NaN	767.274	825.609	803.63	736.721	857.861	867.5	931.111	667.5	778.25	NaN	801.413	NaN	734.663	797.628	0	41.8317	72.8606	17.7739
Z24-E109	73	93	75	59	77	64	64.5	78	NaN	63	71.8333	73	88	72	NaN	75	64	62.5	75	NaN	62	71.4375	904.774	913.25	874.442	997.221	748.332	778.25	NaN	811.134	NaN	798.884	853.286	820.91	847.053	857.861	893.611	NaN	724.163	778.25	NaN	789.163	NaN	784.692	811.963	0	57.7211	55.3844	-19.1633
Z24-E110	74	92	75	58	73	64	64.5	76	NaN	61	70.8333	74	92	70	58	73	66	61.5	75	NaN	62	70.1667	896.413	913.25	829.163	980.553	698.053	778.25	NaN	811.134	NaN	767.274	834.261	835.86	896.413	824.884	829.163	980.553	698.053	805.611	NaN	774.942	NaN	784.692	825.575	0	0	88.3606	0
Z24-E111	75	NaN	83	62	82	72	67.5	81	NaN	64	73.3125	75	90	80	59	75	69	65.5	77	NaN	62	72.5	NaN	NaN	880.274	1043.61	818.611	910.024	NaN	843.384	NaN	811.111	884.502	848.05	870.553	1001.55	843.884	997.221	724.163	856.5	NaN	821.611	NaN	784.692	860.914	0	NaN	NaN	36.3844
Z24-E112	71	NaN	67	55	75	68	66.5	82	NaN	62	68.3125	71	NaN	67	56	73	66	63.5	76	NaN	62	66.8125	NaN	787.134	857.221	931.111	724.163	839	NaN	831.803	NaN	784.692	822.161	786.38	NaN	787.134	843.884	948.611	698.053	805.611	NaN	801.413	NaN	784.692	806.972	0	NaN	0	13.3317
Z24-E113	72	92	77	59	76	71	64.5	82	NaN	64	73.0556	72	90	72	NaN	73	67	62.5	79	NaN	62	72.1875	896.413	947.971	867.5	997.221	736.942	891.884	NaN	811.134	NaN	811.111	870.022	803.63	870.553	857.861	765	NaN	698.053	821.25	NaN	789.163	NaN	784.692	798.775	0	25.8606	90.1106	102.5
Z24-E114	72	86	72	60	72	66	63.5	75	NaN	60	69.6111	72	84	71	NaN	70	66	61.5	75	NaN	60	69.9375	812.582	857.861	829.163	1014.16	684.721	805.611	827.774	801.413	NaN	750.361	820.405	803.63	778.553	840.774	829.163	NaN	667.5	805.611	827.774	774.942	NaN	750.361	786.479	0	34.0239	17.0817	0
Z24-E115	74	84	74	60	77	68	70.5	80	NaN	63	72.2778	74	83	73	59	76	68	69.5	77	NaN	63	71.3889	778.553	894.361	893.611	1014.16	748.332	839	NaN	882.274	NaN	798.884	856.147	835.86	765	876.134	925.553	997.221	736.942	839	NaN	868.692	NaN	798.884	849.254	0	13.5528	18.2211	-31.9422
Z24-E116	68	85	74	55	72	62	64.5	76	NaN	58	68.2778	68	84	71	53	69	62	61.5	73	NaN	57	66.5	793.884	894.361	893.611	931.111	684.721	751.971	904.721	811.134	NaN	719.5	820.557	735.66	778.553	840.774	880.274	897.774	658.332	751.971	866.663	774.942	NaN	706.5	789.144	0	15.3317	53.5817	13.3317
Z24-E117	80	NaN	74	59	85	70	70.5	85	NaN	67	73.8125	78	NaN	71	NaN	81	69	68.5	83	NaN	65	73.6429	NaN	894.361	893.611	997.221	856.384	873.553	NaN	882.274	NaN	843.692	891.585	885	NaN	840.774	874.442	NaN	805.274	856.5	NaN	855.134	NaN	821.692	848.402	30.19	NaN	53.5817	19.1633
Z24-E118	72	86	72	54	73	63	65.5	76	NaN	61	69.1667	72	83	67	54	71	63	62.5	73	NaN	58	67.0556	812.582	857.861	867.5	914.163	698.053	766.361	NaN	821.611	NaN	767.274	813.175	803.63	765	787.134	801.384	914.163	675.274	766.361	NaN	789.163	NaN	719.5	780.179	0	47.5817	70.7211	66.1106
Z24-E119	75	NaN	67	56	74	64	65.5	75	NaN	61	67.1875	75	NaN	68	NaN	73	66	62.5	74	NaN	61	68.5	NaN	787.134	789.163	948.611	712.774	778.25	806.111	821.611	NaN	767.274	801.366	848.05	NaN	798.5	843.884	NaN	698.053	805.611	815	789.163	NaN	767.274	795.692	0	NaN	-11.3606	-54.7211
Z24-E120	72	85	73	54	75	65	65.5	77	NaN	61	69.7222	72	84	71	52	72	65	63.5	74	NaN	59	68.0556	793.884	876.134	874.442	914.163	724.163	791.832	827.774	821.611	NaN	767.274	821.253	803.63	778.553	840.774	829.163	882.221	684.721	791.832	797.5	801.413	NaN	734.663	794.447	0	15.3317	35.3606	45.2739
Z24-E121	75	93	74	59	79	68	70.5	84	NaN	65	74.1667	75	90	72	NaN	78	69	67.5	81	NaN	65	74.6875	904.774	894.361	893.611	997.221	772.5	839	NaN	882.274	NaN	821.692	875.679	848.05	870.553	857.861	NaN	NaN	759.163	856.5	NaN	843.384	NaN	821.692	836.743	0	34.2211	36.5	NaN
Z24-E122	67	NaN	72	55	72	62	65.5	75	NaN	59	65.9375	67	NaN	70	NaN	70	61	62.5	72	NaN	57	65.6429	NaN	857.861	874.442	931.111	684.721	751.971	NaN	821.611	NaN	734.663	808.054	719.86	NaN	824.884	874.442	NaN	667.5	735.832	NaN	789.163	NaN	706.5	759.74	0	NaN	32.9711	0
Z24-E123	70	85	69	55	74	66	65.5	76	NaN	63	69.2778	70	81	67	54	72	63	63.5	73	NaN	60	67.0556	793.884	810.663	867.5	931.111	712.774	805.611	NaN	821.611	NaN	798.884	817.755	770.16	736.721	787.134	765	914.163	684.721	766.361	NaN	801.413	NaN	750.361	775.115	0	57.1633	23.5239	102.5
Z24-E124	71	85	74	59	72	64	63.5	75	NaN	58	69.0556	71	84	72	NaN	70	63	61.5	73	NaN	56	68.8125	793.884	894.361	829.163	997.221	684.721	778.25	NaN	801.413	NaN	719.5	812.314	786.38	778.553	857.861	829.163	NaN	667.5	766.361	NaN	774.942	NaN	693.884	769.33	0	15.3317	36.5	0
Z24-E125	80	NaN	84	61	86	70	73.5	88	NaN	68	76.3125	75	NaN	78	NaN	78	68	73.5	84	NaN	66	74.6429	NaN	1065.38	885.274	1028.33	870.274	873.553	NaN	924.303	NaN	856.442	929.08	848.05	NaN	966.25	867.5	NaN	759.163	839	NaN	924.303	NaN	831.942	862.315	67.13	NaN	99.1344	17.7739
Z24-E126	80	93	79	58	83	72	70.5	84	NaN	64	75.9444	80	92	74	NaN	78	69	70.5	82	NaN	63	76.0625	904.774	984.634	925.553	980.553	828.611	910.024	NaN	882.274	NaN	811.111	903.442	915.19	896.413	894.361	893.611	NaN	759.163	856.5	NaN	882.274	NaN	798.884	862.05	0	8.36055	90.2739	31.9422
Z24-E127	72	90	73	57	73	68	65.5	76	NaN	60	70.5	72	88	67	NaN	70	66	63.5	75	NaN	57	69.8125	870.553	876.134	874.442	964.442	698.053	839	NaN	821.611	NaN	750.361	836.824	803.63	847.053	787.134	857.221	NaN	667.5	805.611	NaN	801.413	NaN	706.5	784.508	0	23.5	89	17.2211
Z24-E128	71	86	75	59	73	68	65.5	78	NaN	62	70.8333	71	86	73	57	71	64	63.5	74	NaN	59	68.7222	812.582	913.25	NaN	997.221	698.053	839	NaN	821.611	NaN	784.692	838.058	786.38	812.582	876.134	NaN	964.442	675.274	778.25	NaN	801.413	NaN	734.663	803.642	0	0	37.1106	NaN
Z24-E129	72	86	76	60	74	68	64.5	78	NaN	62	71.1667	72	84	75	60	71	66	62.5	74	NaN	59	69.2778	812.582	930.721	874.442	1014.16	712.774	839	NaN	811.134	NaN	784.692	847.439	803.63	778.553	913.25	843.884	1014.16	675.274	805.611	NaN	789.163	NaN	734.663	817.577	0	34.0239	17.4711	30.5528
Z24-E130	71	88	67	59	75	66	65.5	73	NaN	59	69.2778	71	87	67	NaN	74	64	63.5	72	NaN	59	69.6875	847.053	787.134	NaN	997.221	724.163	805.611	827.774	821.611	NaN	734.663	818.154	786.38	832.163	787.134	NaN	NaN	712.774	778.25	841.111	801.413	NaN	734.663	784.236	0	14.8844	0	NaN
Z24-E131	71	90	72	57	76	68	67.5	79	NaN	62	71.3889	71	85	67	57	72	66	65.5	75	NaN	61	68.8333	870.553	857.861	874.442	964.442	736.942	839	NaN	843.384	NaN	784.692	846.415	786.38	793.884	787.134	843.884	964.442	684.721	805.611	NaN	821.611	NaN	767.274	806.105	0	76.6633	70.7211	30.5528
Z24-E132	72	90	72	55	74	65	65.5	77	NaN	62	70.2778	72	86	68	54	70	64	63.5	73	NaN	59	67.7222	870.553	857.861	874.442	931.111	712.774	791.832	866.663	821.611	NaN	784.692	834.615	803.63	812.582	798.5	815.274	914.163	667.5	778.25	815	801.413	NaN	734.663	794.098	0	57.9711	59.3606	59.1633
Z24-E133	74	86	68	57	72	66	64.5	73	NaN	59	68.8333	74	84	68	NaN	71	66	62.5	73	NaN	59	69.6875	812.582	798.5	884.442	964.442	684.721	805.611	NaN	811.134	NaN	734.663	812.012	835.86	778.553	798.5	884.442	NaN	675.274	805.611	NaN	789.163	NaN	734.663	787.758	0	34.0239	0	0
Z24-E134	75	88	75	56	85	68	70.5	86	NaN	64	74.1667	75	88	72	56	83	67	68.5	89	NaN	62	73.3889	847.053	913.25	874.442	948.611	856.384	839	NaN	882.274	NaN	811.111	871.516	848.05	847.053	857.861	843.884	948.611	828.611	821.25	NaN	855.134	NaN	784.692	848.35	0	0	55.3844	30.5528
Z24-E135	74	87	74	60	83	69	69.5	81	NaN	62	73.2778	74	91	72	59	75	67	70.5	84	NaN	59	72.3889	832.163	894.361	NaN	1014.16	828.611	856.5	NaN	868.692	NaN	784.692	868.455	835.86	832.163	857.861	NaN	997.221	724.163	821.25	NaN	882.274	NaN	734.663	835.682	0	0	36.5	NaN
Z24-E136	77	86	72	57	81	68	70.5	82	NaN	63	72.9444	75	85	72	56	80	66	69.5	80	NaN	62	71.7222	812.582	857.861	867.5	964.442	805.274	839	NaN	882.274	NaN	798.884	853.477	848.05	793.884	857.861	867.5	948.611	788.332	805.611	NaN	868.692	NaN	784.692	840.359	23.55	18.6922	0	0
Z24-E137	75	91	75	58	78	72	67.5	81	NaN	62	73.2778	75	90	72	57	73	69	66.5	79	NaN	61	71.3889	881.611	913.25	936.942	980.553	759.163	910.024	NaN	843.384	NaN	784.692	876.202	848.05	870.553	857.861	893.611	964.442	698.053	856.5	NaN	831.803	NaN	767.274	843.127	0	11.0528	55.3844	43.3317
Z24-E138	73	87	74	55	77	64	65.5	76	NaN	61	70.2778	73	85	74	54	74	65	62.5	73	NaN	60	68.9444	832.163	894.361	843.884	931.111	748.332	778.25	815	821.611	NaN	767.274	825.776	820.91	793.884	894.361	829.163	914.163	712.774	791.832	806.111	789.163	NaN	750.361	810.272	0	38.2739	0	14.7211
Z24-E139	75	90	79	61	78	68	68.5	77	NaN	62	73.1667	75	88	74	57	77	68	68.5	75	NaN	61	71.5	870.553	984.634	867.5	1028.33	759.163	839	NaN	855.134	NaN	784.692	873.626	848.05	847.053	894.361	843.884	964.442	748.332	839	NaN	855.134	NaN	767.274	845.281	0	23.5	90.2739	23.6106
Z24-E140	73	NaN	65	58	74	66	64.5	78	NaN	60	67.3125	73	NaN	67	NaN	72	62	62.5	75	NaN	60	67.3571	NaN	NaN	829.163	980.553	712.774	805.611	NaN	811.134	NaN	750.361	814.933	820.91	NaN	787.134	857.221	NaN	684.721	751.971	NaN	789.163	NaN	750.361	777.355	0	NaN	NaN	-28.0528
Z24-E141	75	90	74	57	76	70	66.5	74	NaN	63	71.7222	75	88	70	58	75	66	63.5	73	NaN	59	69.7222	870.553	894.361	843.884	964.442	736.942	873.553	854.163	831.803	NaN	798.884	852.065	848.05	847.053	824.884	843.884	980.553	724.163	805.611	854.163	801.413	NaN	734.663	826.444	0	23.5	69.4711	0
Z24-E142	75	90	95	62	80	70	NaN	83	NaN	62	77.125	75	86	83	60	76	67	70.5	81	NaN	61	73.2778	870.553	NaN	948.884	1043.61	788.332	873.553	879.442	NaN	NaN	784.692	884.152	848.05	812.582	NaN	901.663	1014.16	736.942	821.25	854.163	882.274	NaN	767.274	848.707	0	57.9711	NaN	47.2211
Z24-E143	83	90	72	60	78	68	73.5	84	NaN	NaN	76.0625	84	86	72	60	77	68	71.5	80	NaN	NaN	74.8125	870.553	857.861	874.442	1014.16	759.163	839	841.111	924.303	NaN	NaN	872.574	982.77	812.582	857.861	843.884	1014.16	748.332	839	815	895.524	NaN	NaN	867.68	-17.69	57.9711	0	30.5528
Z24-E144	71	85	72	60	73	68	65.5	76	NaN	61	70.1667	71	84	71	59	71	67	62.5	70	NaN	59	68.2778	793.884	857.861	936.942	1014.16	698.053	839	NaN	821.611	NaN	767.274	841.098	786.38	778.553	840.774	948.884	997.221	675.274	821.25	NaN	789.163	NaN	734.663	819.129	0	15.3317	17.0817	-11.9422
Z24-E145	72	86	65	54	73	62	65.5	81	NaN	58	68.5	72	86	66	53	72	63	62.5	80	NaN	58	68.0556	812.582	764.471	843.884	914.163	698.053	751.971	NaN	821.611	NaN	719.5	790.779	803.63	812.582	776.082	843.884	897.774	684.721	766.361	NaN	789.163	NaN	719.5	788.189	0	0	-11.6106	0
Z24-E146	71	87	75	61	76	72	70.5	79	NaN	63	72.7222	71	85	71	NaN	74	68	67.5	75	NaN	61	71.5625	832.163	913.25	880.274	1028.33	736.942	910.024	891.663	882.274	NaN	798.884	874.867	786.38	793.884	840.774	815.274	NaN	712.774	839	891.663	843.384	NaN	767.274	810.045	0	38.2739	72.4711	65
Z24-E147	74	93	79	61	83	74	70.5	82	NaN	65	75.7222	74	90	77	NaN	78	69	68.5	77	NaN	63	74.5625	904.774	984.634	857.221	1028.33	828.611	944.053	NaN	882.274	NaN	821.692	906.449	835.86	870.553	947.971	843.884	NaN	759.163	856.5	NaN	855.134	NaN	798.884	845.994	0	34.2211	36.6633	13.3317
Z24-E148	74	88	72	61	79	73	73.5	85	NaN	65	74.5	74	85	68	60	76	68	68.5	81	NaN	63	71.5	847.053	857.861	874.442	1028.33	772.5	927.832	891.663	924.303	NaN	821.692	882.853	835.86	793.884	798.5	829.163	1014.16	736.942	839	854.163	855.134	NaN	798.884	835.57	0	53.1633	59.3606	45.2739
Z24-E149	75	91	72	64	84	67	67.5	81	NaN	63	73.8333	75	91	73	65	79	67	66.5	76	NaN	62	72.7222	881.611	857.861	888.332	1074.44	841.663	821.25	815	843.384	NaN	798.884	869.159	848.05	881.611	876.134	948.884	1090	772.5	821.25	827.774	831.803	NaN	784.692	868.27	0	0	-18.2739	-60.5528
Z24-E150	75	86	74	64	77	69	67.5	80	NaN	63	72.8333	75	86	74	67	77	68	68.5	80	NaN	64	73.2778	812.582	894.361	936.942	1074.44	748.332	856.5	NaN	843.384	NaN	798.884	870.678	848.05	812.582	894.361	936.942	1119.72	748.332	839	NaN	855.134	NaN	811.111	873.915	0	0	0	0
Z24-E151	81	NaN	79	NaN	88	74	75.5	86	NaN	72	79.3571	78	91	76	NaN	77	69	71.5	81	NaN	69	76.5625	NaN	984.634	1003.88	NaN	896.111	944.053	NaN	953	NaN	917.5	949.864	885	881.611	930.721	925.553	NaN	748.332	856.5	NaN	895.524	NaN	870.111	874.169	46.22	NaN	53.9133	78.3317
Z24-E152	74	84	74	54	76	64	65.5	76	NaN	62	69.9444	74	84	71	55	73	63	63.5	74	NaN	62	68.8333	778.553	894.361	874.442	914.163	736.942	778.25	NaN	821.611	NaN	784.692	822.877	835.86	778.553	840.774	880.274	931.111	698.053	766.361	NaN	801.413	NaN	784.692	813.01	0	0	53.5817	-5.83167
Z24-E153	75	89	71	56	75	65	65.5	77	NaN	61	70.5	75	84	68	NaN	72	65	63.5	73	NaN	61	70.1875	860.192	840.774	867.5	948.611	724.163	791.832	NaN	821.611	NaN	767.274	827.745	848.05	778.553	798.5	880.274	NaN	684.721	791.832	NaN	801.413	NaN	767.274	793.827	0	81.6344	42.2739	-12.7739
Z24-E154	75	89	78	63	73	71	73.5	79	NaN	64	73.9444	75	88	75	NaN	73	70	70.5	78	NaN	63	74.0625	860.192	966.25	901.663	1059.16	698.053	891.884	NaN	924.303	NaN	811.111	889.077	848.05	847.053	913.25	NaN	NaN	698.053	873.553	NaN	882.274	NaN	798.884	837.302	0	13.1344	53	NaN
Z24-E155	78	NaN	76	57	80	68	72.5	79	NaN	64	71.8125	75	NaN	77	58	78	69	71.5	78	NaN	64	71.3125	NaN	930.721	829.163	964.442	788.332	839	NaN	909.721	NaN	811.111	867.499	848.05	NaN	947.971	857.221	980.553	759.163	856.5	NaN	895.524	NaN	811.111	869.512	36.94	NaN	-17.25	-28.0528
Z24-E156	77	91	77	NaN	89	73	68.5	81	NaN	64	77.5625	82	91	71	NaN	72	67	65.5	74	NaN	61	72.9375	881.611	947.971	NaN	NaN	NaN	927.832	NaN	855.134	NaN	811.111	884.732	948.02	881.611	NaN	NaN	NaN	NaN	821.25	NaN	821.611	NaN	767.274	847.953	-76.41	0	NaN	NaN
Z24-E157	75	85	71	60	76	64	65.5	78	NaN	62	70.7222	75	85	69	NaN	75	65	63.5	77	NaN	62	71.4375	793.884	840.774	893.611	1014.16	736.942	778.25	NaN	821.611	NaN	784.692	832.991	848.05	793.884	810.663	893.611	NaN	724.163	791.832	NaN	801.413	NaN	784.692	806.039	0	0	30.1106	0
Z24-E158	75	85	73	55	74	64	64.5	77	NaN	61	69.8333	75	84	73	54	74	66	62.5	76	NaN	61	69.5	793.884	876.134	789.163	931.111	712.774	778.25	815	811.134	NaN	767.274	808.303	848.05	778.553	876.134	843.884	914.163	712.774	805.611	827.774	789.163	NaN	767.274	816.338	0	15.3317	0	-54.7211
Z24-E159	75	85	72	54	74	68	65.5	75	NaN	61	69.9444	75	83	72	55	73	65	63.5	74	NaN	58	68.7222	793.884	857.861	867.5	914.163	712.774	839	NaN	821.611	NaN	767.274	821.758	848.05	765	857.861	857.221	931.111	698.053	791.832	NaN	801.413	NaN	719.5	807.782	0	28.8844	0	10.2739
Z24-E160	75	86	76	57	78	66	68.5	78	NaN	63	71.9444	75	90	79	NaN	78	70	71.5	81	NaN	64	76.0625	812.582	930.721	885.274	964.442	759.163	805.611	841.111	855.134	NaN	798.884	850.325	848.05	870.553	984.634	893.611	NaN	759.163	873.553	879.442	895.524	NaN	811.111	868.405	0	-57.9711	-53.9133	-8.33166
Z24-E161	71	83	72	54	72	64	67.5	75	NaN	57	68.3889	71	80	69	52	68	62	64.5	72	NaN	56	66.0556	765	857.861	843.884	914.163	684.721	778.25	NaN	843.384	NaN	706.5	799.22	786.38	720.832	810.663	789.163	882.221	651.111	751.971	NaN	811.134	NaN	693.884	766.373	0	44.1633	47.1922	54.7211
Z24-E162	68	83	66	51	73	64	63.5	77	NaN	59	67.1667	68	81	65	52	72	63	61.5	72	NaN	57	65.7222	765	776.082	741.942	865.274	698.053	778.25	797.5	801.413	NaN	734.663	773.131	735.66	736.721	764.471	741.942	882.221	684.721	766.361	NaN	774.942	NaN	706.5	754.838	0	28.2739	11.6106	0
Z24-E163	73	86	70	55	74	67	64.5	77	NaN	60	69.6111	73	85	69	NaN	74	66	61.5	77	NaN	59	70.5625	812.582	824.884	843.884	931.111	712.774	821.25	NaN	811.134	NaN	750.361	813.498	820.91	793.884	810.663	815.274	NaN	712.774	805.611	NaN	774.942	NaN	734.663	783.59	0	18.6922	14.2211	28.6106
Z24-E164	74	86	75	58	80	66	65.5	78	NaN	63	71.7222	74	84	74	58	78	67	67.5	78	NaN	62	71.3889	812.582	913.25	874.442	980.553	788.332	805.611	NaN	821.611	NaN	798.884	849.408	835.86	778.553	894.361	880.274	980.553	759.163	821.25	NaN	843.384	NaN	784.692	842.01	0	34.0239	18.8844	-5.83167
Z24-E165	75	88	77	58	76	68	69.5	81	NaN	64	72.9444	75	85	74	NaN	75	67	67.5	77	NaN	63	72.9375	847.053	947.971	867.5	980.553	736.942	839	NaN	868.692	NaN	811.111	862.353	848.05	793.884	894.361	843.884	NaN	724.163	821.25	NaN	843.384	NaN	798.884	820.983	0	53.1633	53.6106	23.6106
Z24-E166	78	85	74	62	79	73	67.5	79	NaN	63	73.3889	74	84	71	62	74	67	64.5	79	NaN	63	70.9444	793.884	894.361	990.274	1043.61	772.5	927.832	NaN	843.384	NaN	798.884	883.091	835.86	778.553	840.774	948.884	1043.61	712.774	821.25	NaN	811.134	NaN	798.884	843.525	49.13	15.3317	53.5817	41.3844
Z24-E167	74	85	72	61	74	63	64.5	78	NaN	60	70.1667	74	84	69	61	74	63	61.5	77	NaN	59	69.1667	793.884	857.861	874.442	1028.33	712.774	766.361	854.163	811.134	NaN	750.361	827.701	835.86	778.553	810.663	NaN	1028.33	712.774	766.361	NaN	774.942	NaN	734.663	805.268	0	15.3317	47.1922	NaN
Z24-E168	77	90	77	55	82	66	69.5	82	NaN	65	73.7222	75	88	71	55	79	65	65.5	78	NaN	62	70.9444	870.553	947.971	885.274	931.111	818.611	805.611	NaN	868.692	NaN	821.692	868.689	848.05	847.053	840.774	867.5	931.111	772.5	791.832	NaN	821.611	NaN	784.692	833.902	23.55	23.5	107.192	17.7739
Z24-E169	81	86	77	61	80	71	72.5	85	NaN	NaN	76.6875	81	86	76	57	78	69	71.5	83	NaN	NaN	75.1875	812.582	947.971	857.221	1028.33	788.332	891.884	NaN	909.721	NaN	NaN	890.863	931.22	812.582	930.721	843.884	964.442	759.163	856.5	NaN	895.524	NaN	NaN	874.255	0	0	17.25	13.3317
Z24-E170	75	88	76	56	76	71	67.5	80	NaN	65	72.7222	75	88	70	53	72	65	68.5	72	NaN	62	69.5	847.053	930.721	874.442	948.611	736.942	891.884	879.442	843.384	NaN	821.692	863.797	848.05	847.053	824.884	843.884	897.774	684.721	791.832	827.774	855.134	NaN	784.692	820.58	0	0	105.832	30.5528
Z24-E171	72	90	72	58	73	67	67.5	77	NaN	61	70.8333	72	88	74	NaN	76	69	68.5	79	NaN	61	73.4375	870.553	857.861	NaN	980.553	698.053	821.25	757.774	843.384	NaN	767.274	824.588	803.63	847.053	894.361	NaN	NaN	736.942	856.5	NaN	855.134	NaN	767.274	822.985	0	23.5	-36.5	NaN
Z24-E172	77	90	75	60	80	70	72.5	79	NaN	64	74.1667	75	88	75	61	77	69	68.5	79	NaN	63	72.8333	870.553	913.25	888.332	1014.16	788.332	873.553	NaN	909.721	NaN	811.111	883.627	848.05	847.053	913.25	901.663	1028.33	748.332	856.5	NaN	855.134	NaN	798.884	866.355	23.55	23.5	0	-13.3317
Z24-E173	78	85	72	61	75	65	67.5	81	NaN	62	71.8333	80	84	72	NaN	73	66	69.5	80	NaN	62	73.3125	793.884	857.861	893.611	1028.33	724.163	791.832	841.111	843.384	NaN	784.692	839.874	915.19	778.553	857.861	893.611	NaN	698.053	805.611	854.163	868.692	NaN	784.692	828.492	-30.19	15.3317	0	0
Z24-E174	78	100	85	63	84	71	NaN	84	NaN	66	78.875	77	100	85	NaN	80	71	73.5	84	NaN	NaN	81.5	964.803	1081.13	913.053	1059.16	841.663	891.884	NaN	NaN	NaN	831.942	940.52	871.61	964.803	1081.13	NaN	NaN	788.332	891.884	NaN	924.303	NaN	NaN	920.344	13.38	0	0	NaN
Z24-E175	70	90	71	60	82	71	73.5	84	NaN	NaN	75.1875	70	90	71	61	77	69	70.5	83	NaN	NaN	73.9375	870.553	840.774	893.611	1014.16	818.611	891.884	NaN	924.303	NaN	NaN	893.414	770.16	870.553	840.774	880.274	1028.33	748.332	856.5	NaN	882.274	NaN	NaN	859.65	0	0	0	13.3317
Z24-E176	81	NaN	76	60	80	69	72.5	84	NaN	NaN	74.6429	81	NaN	75	NaN	77	69	73.5	83	NaN	NaN	76.4167	NaN	930.721	874.442	1014.16	788.332	856.5	NaN	909.721	NaN	NaN	895.647	931.22	NaN	913.25	874.442	NaN	748.332	856.5	NaN	924.303	NaN	NaN	874.674	0	NaN	17.4711	0
Z24-E177	72	85	72	56	79	68	NaN	80	NaN	62	71.75	72	85	75	56	77	69	75.5	78	NaN	64	72.3889	793.884	857.861	874.442	948.611	772.5	839	NaN	NaN	NaN	784.692	838.713	803.63	793.884	913.25	NaN	948.611	748.332	856.5	NaN	953	NaN	811.111	853.54	0	0	-55.3844	NaN
Z24-E178	78	86	76	59	76	68	69.5	78	NaN	62	72.5	73	85	76	NaN	73	67	69.5	75	NaN	62	72.5625	812.582	930.721	NaN	997.221	736.942	839	841.111	868.692	NaN	784.692	851.37	820.91	793.884	930.721	NaN	NaN	698.053	821.25	854.163	868.692	NaN	784.692	821.546	64.08	18.6922	0	NaN
Z24-E179	74	88	74	64	83	69	73.5	82	NaN	66	74.8333	74	86	74	NaN	80	69	73.5	79	NaN	63	74.8125	847.053	894.361	885.274	1074.44	828.611	856.5	NaN	924.303	NaN	831.942	892.811	835.86	812.582	894.361	NaN	NaN	788.332	856.5	NaN	924.303	NaN	798.884	844.403	0	34.4711	0	NaN
Z24-E180	74	84	72	56	75	64	65.5	75	NaN	59	69.3889	74	84	69	NaN	72	65	63.5	73	NaN	58	69.8125	778.553	857.861	815.274	948.611	724.163	778.25	771.663	821.611	NaN	734.663	803.405	835.86	778.553	810.663	843.884	NaN	684.721	791.832	771.663	801.413	NaN	719.5	782.01	0	0	47.1922	-28.6106
Z24-E181	71	86	77	60	73	67	65.5	NaN	NaN	61	70.0625	71	85	78	NaN	72	63	63.5	NaN	NaN	59	70.2143	812.582	947.971	936.942	1014.16	698.053	821.25	854.163	821.611	NaN	767.274	852.668	786.38	793.884	NaN	913.053	NaN	684.721	766.361	841.111	801.413	NaN	734.663	790.198	0	18.6922	NaN	23.8844
Z24-E182	74	85	66	61	73	67	66.5	78	NaN	62	70.2778	74	84	67	NaN	71	69	63.5	78	NaN	62	71.0625	793.884	776.082	857.221	1028.33	698.053	821.25	NaN	831.803	NaN	784.692	823.915	835.86	778.553	787.134	NaN	NaN	675.274	856.5	NaN	801.413	NaN	784.692	788.49	0	15.3317	-11.0528	NaN
Z24-E183	78	90	72	56	85	64	70.5	80	NaN	63	73.1667	79	86	70	56	77	65	68.5	77	NaN	61	71.0556	870.553	857.861	880.274	948.611	856.384	778.25	NaN	882.274	NaN	798.884	859.136	900.3	812.582	824.884	829.163	948.611	748.332	791.832	NaN	855.134	NaN	767.274	830.901	-15.3	57.9711	32.9711	51.1106
Z24-E184	75	NaN	71	61	77	68	68.5	78	NaN	64	70.3125	75	NaN	69	60	73	65	67.5	74	NaN	61	68.0625	NaN	840.774	867.5	1028.33	748.332	839	NaN	855.134	NaN	811.111	855.74	848.05	NaN	810.663	829.163	1014.16	698.053	791.832	NaN	843.384	NaN	767.274	825.323	0	NaN	30.1106	38.3317
Z24-E185	75	85	76	62	76	71	67.5	NaN	NaN	62	71.8125	75	85	72	NaN	73	66	64.5	NaN	NaN	59	70.6429	793.884	930.721	874.442	1043.61	736.942	891.884	NaN	843.384	NaN	784.692	862.445	848.05	793.884	857.861	874.442	NaN	698.053	805.611	NaN	811.134	NaN	734.663	802.962	0	0	72.8606	0
Z24-E186	75	94	73	54	75	67	65.5	77	NaN	60	71.1667	75	93	70	51	72	66	62.5	74	NaN	59	69.1667	913.634	876.134	789.163	914.163	724.163	821.25	NaN	821.611	NaN	750.361	826.31	848.05	NaN	824.884	754.442	865.274	684.721	805.611	NaN	789.163	NaN	734.663	788.351	0	NaN	51.25	34.7211
Z24-E187	77	92	74	65	79	66	70.5	81	NaN	64	74.2778	77	90	71	NaN	79	67	67.5	82	NaN	63	74.5625	896.413	894.361	962.221	1090	772.5	805.611	936.111	882.274	NaN	811.111	894.511	871.61	870.553	840.774	990.274	NaN	772.5	821.25	936.111	843.384	NaN	798.884	860.593	0	25.8606	53.5817	-28.0528
Z24-E188	72	81	65	54	74	62	64.5	75	NaN	58	67.2778	72	81	66	55	73	63	62.5	74	NaN	58	67.1667	736.721	764.471	801.384	914.163	712.774	751.971	797.5	811.134	NaN	719.5	778.847	803.63	736.721	776.082	829.163	931.111	698.053	766.361	815	789.163	NaN	719.5	786.478	0	0	-11.6106	-27.7739
Z24-E189	73	100	78	59	76	69	64.5	77	NaN	64	73.3889	73	100	76	60	72	68	61.5	74	NaN	63	71.9444	NaN	966.25	925.553	997.221	736.942	856.5	879.442	811.134	NaN	811.111	873.019	820.91	NaN	930.721	901.663	1014.16	684.721	839	879.442	774.942	NaN	798.884	849.383	0	NaN	35.5239	23.8844
Z24-E190	77	89	71	62	81	71	73.5	82	NaN	NaN	75.8125	77	88	71	61	77	69	73.5	80	NaN	NaN	74.5625	860.192	840.774	867.5	1043.61	805.274	891.884	NaN	924.303	NaN	NaN	890.505	871.61	847.053	840.774	843.884	1028.33	748.332	856.5	NaN	924.303	NaN	NaN	870.098	0	13.1344	0	23.6106
Z24-E191	70	86	72	54	73	61	64.5	73	NaN	58	67.9444	70	83	72	NaN	72	61	62.5	70	NaN	56	68.3125	812.582	857.861	843.884	914.163	698.053	735.832	NaN	811.134	NaN	719.5	799.126	770.16	765	857.861	815.274	NaN	684.721	735.832	NaN	789.163	NaN	693.884	763.987	0	47.5817	0	28.6106
Z24-E192	75	99	78	62	81	68	67.5	82	NaN	65	75.2778	75	97	78	NaN	79	67	65.5	84	NaN	63	76.0625	NaN	966.25	829.163	1043.61	805.274	839	NaN	843.384	NaN	821.692	878.339	848.05	NaN	966.25	843.884	NaN	772.5	821.25	NaN	821.611	NaN	798.884	838.918	0	NaN	0	-14.7211
Z24-E193	75	86	68	56	71	61	64.5	76	NaN	59	68.5	75	85	67	54	69	60	61.5	73	NaN	58	66.9444	812.582	798.5	874.442	948.611	675.274	735.832	797.5	811.134	NaN	734.663	798.726	848.05	793.884	787.134	874.442	914.163	658.332	718.942	797.5	774.942	NaN	719.5	788.689	0	18.6922	11.3606	0
Z24-E194	75	NaN	73	62	80	71	73.5	82	NaN	NaN	73.7857	75	NaN	71	NaN	78	68	71.5	79	NaN	NaN	73.75	NaN	876.134	857.221	1043.61	788.332	891.884	815	924.303	NaN	NaN	885.212	848.05	NaN	840.774	829.163	NaN	759.163	839	797.5	895.524	NaN	NaN	829.882	0	NaN	35.3606	28.0528
Z24-E195	68	80	64	58	70	60	64.5	71	NaN	58	65.9444	68	78	65	58	68	61	61.5	71	NaN	57	65.2778	720.832	747.5	NaN	980.553	667.5	718.942	NaN	811.134	NaN	719.5	766.566	735.66	691.553	764.471	NaN	980.553	651.111	735.832	NaN	774.942	NaN	706.5	755.078	0	29.2739	-16.9711	NaN
Z24-E196	71	85	73	58	76	69	65.5	75	NaN	61	70.3889	71	84	71	NaN	74	67	63.5	73	NaN	60	70.4375	793.884	876.134	874.442	980.553	736.942	856.5	854.163	821.611	NaN	767.274	840.167	786.38	778.553	840.774	874.442	NaN	712.774	821.25	806.111	801.413	NaN	750.361	796.895	0	15.3317	35.3606	0
Z24-E197	75	NaN	69	55	76	65	66.5	NaN	NaN	65	67.3571	75	NaN	69	55	75	66	67.5	NaN	NaN	64	67.3571	NaN	NaN	789.163	931.111	736.942	791.832	854.163	831.803	NaN	821.692	822.387	848.05	NaN	NaN	815.274	931.111	724.163	805.611	797.5	843.384	NaN	811.111	822.025	0	NaN	NaN	-26.1106
Z24-E198	79	93	74	59	79	68	70.5	83	NaN	70	75.0556	74	90	72	58	79	68	70.5	80	NaN	68	73.2778	904.774	894.361	874.442	997.221	772.5	839	NaN	882.274	NaN	884.134	881.088	835.86	870.553	857.861	829.163	980.553	772.5	839	NaN	882.274	NaN	856.442	858.245	64.44	34.2211	36.5	45.2739
Z24-E199	70	86	64	54	75	62	63.5	72	NaN	57	67.0556	70	85	64	NaN	70	61	61.5	70	NaN	56	67.1875	812.582	747.5	765	914.163	724.163	751.971	NaN	801.413	NaN	706.5	777.912	770.16	793.884	747.5	789.163	NaN	667.5	735.832	NaN	774.942	NaN	693.884	746.608	0	18.6922	0	-24.1633
Z24-E200	82	85	76	63	73	68	65.5	82	NaN	64	73.1667	74	84	75	NaN	72	66	62.5	79	NaN	62	71.8125	793.884	930.721	893.611	1059.16	698.053	839	NaN	821.611	NaN	811.111	855.894	835.86	778.553	913.25	874.442	NaN	684.721	805.611	NaN	789.163	NaN	784.692	808.287	112.16	15.3317	17.4711	19.1633
Z24-E201	76.9	93.3333	76.9	NaN	81.5	70.3	70.1	81.3	NaN	64.2	76.8167	76.3	91.3333	75.8	NaN	NaN	69.4	70.6	80.7	NaN	64.2	75.4762	900.336	946.557	909.581	1014.66	809.407	879.428	891.942	876.877	NaN	812.456	893.472	864.821	882.081	926.777	898.886	1019.17	783.966	863.321	887.869	883.597	NaN	812.832	882.331	7.459	18.2548	19.7788	13.5302
Z24-E202	68.8	78.8889	70.5	55.2	NaN	61	64.5	73.1	NaN	57.9	66.2361	68.5	76.2222	67.3	NaN	NaN	60.6	61.5	69.5	NaN	56.3	65.7032	709.608	838.206	845.831	934.665	702.1	735.107	788.888	811.285	NaN	718.849	787.171	744.182	675.588	790.529	829.441	898.192	673.014	728.676	767.312	775.186	NaN	697.669	757.979	5.072	34.0191	47.6759	9.56317
[truncated: 178 more columns]
