# Supplementary material for: Diversity of Maize Shoot Apical Meristem Architecture and Its Relationship to Plant Morphology
Source: G3 (Bethesda). 2015 Mar 5;5(5):819–27. doi: 10.1534/g3.115.017541 (PMC4426368; doi:10.1534/g3.115.017541)
Supplement: Supporting Information [file supp_g3.115.017541_TableS10.xlsx]

## Sheet: Timecourse parents raw
Supplementary data table S10. Raw SAM architecture data across timepoints for parental inbreds B73, Mo17, P39
line	days_after_planting	experiment	SAM_width	SAM_height	SAM_p1.p2.difference	SAM_height.width.ratio	SAM_volume
	(days)		(µm)	(µm)	(µm)		(µm3)
B73	7	3	96	192	68	0.66	6381306
B73	7	3	162	111	48	0.62	7595034
B73	7	3	145	186	79	0.91	5849695
B73	7	3	102	138	63	0.59	11934052
B73	7	3	180	157	75	0.72	9432976
B73	10	3	176	152	46	0.49	4496851
B73	10	3	139	118	45	0.97	10082230
B73	10	3	165	127	72	0.8	4406015
B73	10	3	103	177	43	0.17	4732191
B73	10	3	149	159	49	0.29	1439513
B73	14	3	111	124	49	0.79	13844662
B73	14	3	100	141	58	0.46	11831145
B73	14	3	97	179	78	0.14	4038933
B73	14	3	155	184	46	0.86	9777646
B73	14	3	171	166	74	0.51	8971120
B73	17	3	105	180	60	0.31	11944146
B73	17	3	149	183	90	0.14	13418870
B73	17	3	145	142	87	0.64	7381228
B73	17	3	154	98	48	0.99	5543624
B73	17	3	101	119	44	0.36	3903628
B73	21	3	171	181	66	0.03	9687907
B73	21	3	140	141	60	0.34	2691108
B73	21	3	182	163	90	0.93	9205500
B73	21	3	135	124	55	0.74	5737305
B73	21	3	157	159	72	0.83	8096631
B73	28	3	96	101	43	0.99	1049685
B73	28	3	141	119	74	0.94	6533905
B73	28	3	170	161	46	0.44	4750502
B73	28	3	170	154	63	0.47	1868210
B73	28	3	97	97	59	0.74	1296296
Mo17	7	3	171	144	65	0.91	2357323
Mo17	7	3	94	154	85	0.06	1396076
Mo17	7	3	96	169	74	0.46	11448659
Mo17	7	3	176	114	77	0.02	13247754
Mo17	7	3	108	160	41	0.91	6948709
Mo17	10	3	112	103	53	0.42	3729638
Mo17	10	3	161	149	41	0.74	9152334
Mo17	10	3	183	146	71	0.07	9731422
Mo17	10	3	117	130	56	0.9	3843516
Mo17	10	3	133	180	55	0.53	11143543
Mo17	14	3	134	140	60	0.6	2123278
Mo17	14	3	188	173	51	0.75	13110466
Mo17	14	3	92	113	50	0.11	13632051
Mo17	14	3	114	158	55	0.41	3258412
Mo17	14	3	94	189	79	0.37	11577611
Mo17	17	3	192	192	56	0.61	4304052
Mo17	17	3	169	166	89	0.19	12875508
Mo17	17	3	111	118	42	0.74	8135051
Mo17	17	3	160	101	80	0.98	12695579
Mo17	17	3	141	163	72	0.48	9285794
Mo17	21	3	117	147	88	0.27	8701712
Mo17	21	3	91	190	49	0.37	3259923
Mo17	21	3	120	177	74	0.21	3598414
Mo17	21	3	170	183	56	0.57	13956972
Mo17	21	3	140	107	77	0.2	7633428
Mo17	28	3	117	136	43	0.59	8252171
Mo17	28	3	95	106	72	0.37	6303743
Mo17	28	3	119	137	58	0.13	7591693
Mo17	28	3	109	193	66	0.18	3459566
Mo17	28	3	166	172	88	0.3	12924811
P39	7	3	165	195	42	0.09	8369959
P39	7	3	94	117	61	0.06	4955469
P39	7	3	165	125	88	0.81	4748802
P39	7	3	100	151	68	0.37	11760902
P39	7	3	95	168	79	0.86	11325713
P39	10	3	141	90	75	0.27	12029497
P39	10	3	149	172	48	0.86	13798459
P39	10	3	152	104	79	0.19	5783889
P39	10	3	175	161	77	0.86	7618842
P39	10	3	160	134	43	0.36	4393246
P39	14	3	144	178	79	0.89	8592880
P39	14	3	154	177	83	0.43	6118692
P39	14	3	178	196	61	0.51	10398791
P39	14	3	131	198	84	0.75	2756054
P39	14	3	196	187	40	0.02	11924042
P39	17	3	111	128	57	0.38	7383061
P39	17	3	186	171	65	0.77	5211679
P39	17	3	129	169	56	0.63	8403264
P39	17	3	108	131	79	0.81	6411922
P39	17	3	111	143	40	0.64	5353365
P39	21	3	178	121	73	0.7	5840819
P39	21	3	132	193	67	0.83	6638177
P39	21	3	197	180	52	0.44	7893972
P39	21	3	155	144	44	0.52	9627277
P39	21	3	128	184	87	0.84	12915923
P39	28	3	176	189	40	0.13	2761080
P39	28	3	117	161	70	0.97	13521369
P39	28	3	92	165	65	0.98	12238275
P39	28	3	191	155	59	0.18	10397643
P39	28	3	133	154	47	0.61	7256437
B73	7	1	138	138	NA	0.86	2.40809e+06
B73	7	1	138	152	NA	1.10145	2.97552e+06
B73	7	1	132	151	NA	1.14394	2.83592e+06
B73	7	1	138	141	NA	1.02174	2.52224e+06
B73	7	1	147	175	NA	1.19048	4.29118e+06
B73	7	1	143	165	NA	1.15385	3.67707e+06
B73	7	1	149	173	NA	1.16107	4.21931e+06
B73	7	1	146	134	NA	0.917808	2.38151e+06
B73	14	1	165	245	NA	1.48485	1.03195e+07
B73	14	1	164	227	NA	1.38415	8.52215e+06
B73	14	1	162	239	NA	1.47531	9.61125e+06
B73	14	1	137	168	NA	1.22628	3.72097e+06
B73	14	1	159	205	NA	1.28931	6.54607e+06
B73	14	1	180	227	NA	1.26111	9.01279e+06
B73	14	1	185	273	NA	1.47568	1.43225e+07
B73	14	1	187	255	NA	1.36364	1.21837e+07
B73	14	1	199	257	NA	1.29146	1.28845e+07
B73	14	1	188	262	NA	1.39362	1.30532e+07
B73	21	1	161	199	NA	1.23602	6.15192e+06
B73	21	1	162	201	NA	1.24074	6.32344e+06
B73	21	1	163	198	NA	1.21472	6.13023e+06
B73	21	1	176	255	NA	1.44886	1.17839e+07
B73	21	1	160	188	NA	1.175	5.36912e+06
B73	21	1	164	204	NA	1.2439	6.59983e+06
B73	21	1	176	233	NA	1.32386	9.45744e+06
B73	21	1	170	205	NA	1.20588	6.83741e+06
B73	21	1	180	261	NA	1.45	1.26302e+07
B73	21	1	164	234	NA	1.42683	9.18033e+06
B73	28	1	186	293	NA	1.57527	1.71511e+07
B73	28	1	191	226	NA	1.18325	9.28167e+06
B73	28	1	178	264	NA	1.48315	1.29188e+07
B73	28	1	208	282	NA	1.35577	1.65332e+07
B73	28	1	173	250	NA	1.44509	1.11195e+07
B73	28	1	180	210	NA	1.16667	7.52097e+06
B73	28	1	176	224	NA	1.27273	8.60973e+06
B73	28	1	199	282	NA	1.41709	1.61276e+07
B73	28	1	173	213	NA	1.23121	7.56325e+06
Mo17	7	1	172	125	NA	0.726744	2.47485e+06
Mo17	7	1	144	81	NA	0.5625	937845
Mo17	7	1	136	78	NA	0.573529	815016
Mo17	7	1	126	77	NA	0.611111	719095
Mo17	7	1	139	97	NA	0.697842	1.21385e+06
Mo17	7	1	155	120	NA	0.774194	2.03693e+06
Mo17	7	1	132	82	NA	0.621212	849771
Mo17	7	1	152	93	NA	0.611842	1.26494e+06
Mo17	14	1	137	76	NA	0.554745	790010
Mo17	14	1	147	103	NA	0.70068	1.44619e+06
Mo17	14	1	152	87	NA	0.572368	1.13413e+06
Mo17	14	1	181	119	NA	0.657459	2.41331e+06
Mo17	14	1	151	98	NA	0.649007	1.37029e+06
Mo17	14	1	157	88	NA	0.56051	1.20863e+06
Mo17	14	1	155	92	NA	0.593548	1.2757e+06
Mo17	14	1	144	82	NA	0.569444	956421
Mo17	21	1	185	120	NA	0.648649	2.51759e+06
Mo17	21	1	202	151	NA	0.747525	4.2223e+06
Mo17	21	1	203	157	NA	0.773399	4.56696e+06
Mo17	21	1	201	135	NA	0.671642	3.43008e+06
Mo17	21	1	215	209	NA	0.972093	8.57397e+06
Mo17	21	1	205	172	NA	0.839024	5.50285e+06
Mo17	21	1	201	135	NA	0.671642	3.43008e+06
Mo17	21	1	175	97	NA	0.554286	1.64443e+06
Mo17	21	1	193	135	NA	0.699482	3.26298e+06
B73	7	2	145	156	85	1.07586	3.27581e+06
B73	7	2	134	150	81	1.1194	2.82484e+06
B73	7	2	156	197	73	1.26282	5.88578e+06
B73	7	2	146	149	67	1.02055	2.97928e+06
B73	7	2	143	150	88	1.04895	2.97169e+06
B73	7	2	144	141	46	0.979167	2.61593e+06
B73	7	2	141	176	61	1.24823	4.22862e+06
B73	7	2	161	195	87	1.21118	5.86735e+06
B73	7	2	138	175	75	1.26812	4.11491e+06
B73	10	2	149	170	90	1.14094	4.05455e+06
B73	10	2	150	209	58	1.39333	6.62677e+06
B73	10	2	147	179	84	1.21769	4.52198e+06
B73	10	2	156	203	68	1.30128	6.32014e+06
B73	10	2	167	221	86	1.32335	8.07203e+06
B73	10	2	159	211	92	1.32704	7.01342e+06
B73	10	2	163	220	83	1.34969	7.87067e+06
B73	10	2	156	204	67	1.30769	6.39474e+06
B73	10	2	151	202	64	1.33775	6.1244e+06
B73	10	2	153	198	55	1.29412	5.88453e+06
B73	14	2	154	211	83	1.37013	6.88374e+06
B73	14	2	152	212	74	1.39474	6.91237e+06
B73	14	2	163	230	84	1.41104	8.77035e+06
B73	14	2	161	235	68	1.45963	9.18729e+06
B73	14	2	168	233	80	1.3869	9.20563e+06
B73	14	2	168	243	78	1.44643	1.02064e+07
B73	14	2	160	231	82	1.44375	8.77634e+06
B73	14	2	152	188	74	1.23684	5.18485e+06
B73	14	2	153	196	83	1.28105	5.74422e+06
B73	14	2	156	218	80	1.39744	7.50796e+06
B73	17	2	159	253	76	1.59119	1.0991e+07
B73	17	2	148	217	83	1.46622	7.21685e+06
B73	17	2	195	233	98	1.19487	1.01024e+07
B73	17	2	166	252	88	1.51807	1.11061e+07
B73	17	2	144	219	61	1.52083	7.28291e+06
B73	17	2	156	227	62	1.45513	8.29395e+06
B73	17	2	145	213	75	1.46897	6.81848e+06
B73	17	2	162	268	105	1.65432	1.28407e+07
B73	17	2	161	235	114	1.45963	9.18729e+06
B73	17	2	159	251	97	1.57862	1.07717e+07
B73	21	2	171	274	82	1.60234	1.39172e+07
B73	21	2	167	280	56	1.67665	1.45606e+07
B73	21	2	164	242	80	1.47561	9.9767e+06
B73	21	2	172	260	77	1.51163	1.22233e+07
B73	21	2	156	246	78	1.57692	1.01457e+07
B73	21	2	181	294	72	1.62431	1.70881e+07
B73	21	2	176	279	55	1.58523	1.47651e+07
B73	21	2	167	254	73	1.52096	1.1362e+07
B73	21	2	187	316	96	1.68984	2.08613e+07
B73	21	2	164	243	75	1.48171	1.00796e+07
B73	28	2	172	288	94	1.67442	1.58535e+07
B73	28	2	178	282	93	1.58427	1.52508e+07
B73	28	2	196	338	78	1.72449	2.53175e+07
B73	28	2	183	242	92	1.3224	1.06033e+07
B73	28	2	183	302	91	1.65027	1.83934e+07
B73	28	2	188	229	99	1.21809	9.4663e+06
B73	28	2	192	293	109	1.52604	1.74121e+07
B73	28	2	183	274	83	1.49727	1.43742e+07
B73	28	2	172	252	76	1.46512	1.13068e+07
Mo17	7	2	166	134	55	0.807229	2.70987e+06
Mo17	7	2	147	106	77	0.721088	1.52311e+06
Mo17	7	2	120	81	68	0.675	736305
Mo17	7	2	149	105	77	0.704698	1.52155e+06
Mo17	7	2	145	82	54	0.565517	965728
Mo17	7	2	154	115	72	0.746753	1.86735e+06
Mo17	7	2	131	86	69	0.656489	912601
Mo17	7	2	155	110	74	0.709677	1.73471e+06
Mo17	7	2	146	92	50	0.630137	1.17783e+06
Mo17	10	2	195	143	88	0.733333	3.66644e+06
Mo17	10	2	189	131	80	0.693122	3.01471e+06
Mo17	10	2	150	105	83	0.7	1.53388e+06
Mo17	10	2	154	116	88	0.753247	1.89762e+06
Mo17	10	2	158	103	110	0.651899	1.58189e+06
Mo17	10	2	153	115	83	0.751634	1.85349e+06
Mo17	10	2	160	102	54	0.6375	1.58106e+06
Mo17	10	2	178	144	61	0.808989	3.35514e+06
Mo17	10	2	137	81	89	0.591241	875277
Mo17	14	2	167	123	86	0.736527	2.32144e+06
Mo17	14	2	175	130	93	0.742857	2.71378e+06
Mo17	14	2	180	123	86	0.683333	2.53933e+06
Mo17	14	2	162	116	59	0.716049	2.01278e+06
Mo17	14	2	178	132	70	0.741573	2.84664e+06
Mo17	14	2	169	115	74	0.680473	2.08615e+06
Mo17	14	2	163	100	80	0.613497	1.56696e+06
Mo17	14	2	189	143	77	0.756614	3.53706e+06
Mo17	14	2	157	102	93	0.649682	1.54297e+06
Mo17	17	2	187	139	94	0.743316	3.31497e+06
Mo17	17	2	195	122	70	0.625641	2.77252e+06
Mo17	17	2	177	122	75	0.689266	2.45172e+06
Mo17	17	2	153	91	71	0.594771	1.2311e+06
Mo17	17	2	190	120	101	0.631579	2.60595e+06
Mo17	17	2	179	133	92	0.743017	2.9053e+06
Mo17	17	2	168	114	77	0.678571	2.03926e+06
Mo17	17	2	182	137	87	0.752747	3.12842e+06
Mo17	17	2	180	119	95	0.661111	2.39644e+06
Mo17	21	2	212	223	69	1.05189	9.74231e+06
Mo17	21	2	204	190	70	0.931373	6.69645e+06
Mo17	21	2	184	221	91	1.20109	8.58989e+06
Mo17	21	2	205	224	51	1.09268	9.58165e+06
Mo17	21	2	179	131	71	0.731844	2.8254e+06
Mo17	21	2	197	154	83	0.781726	4.25932e+06
Mo17	21	2	211	172	81	0.815166	5.67144e+06
Mo17	21	2	212	220	64	1.03774	9.45815e+06
Mo17	21	2	211	200	41	0.947867	7.68545e+06
Mo17	21	2	203	171	54	0.842365	5.38535e+06
P39	7	2	139	166	81	1.19424	3.65459e+06
P39	7	2	165	174	80	1.05455	4.6186e+06
P39	7	2	174	165	75	0.948276	4.31381e+06
P39	7	2	176	184	94	1.04545	5.49998e+06
P39	7	2	153	143	87	0.934641	2.84566e+06
P39	7	2	160	151	60	0.94375	3.32074e+06
P39	7	2	151	144	69	0.953642	2.85282e+06
P39	7	2	169	155	66	0.91716	3.68827e+06
P39	7	2	156	154	64	0.987179	3.38405e+06
P39	7	2	133	137	73	1.03008	2.29802e+06
P39	10	2	192	227	83	1.18229	9.41073e+06
P39	10	2	175	206	81	1.17714	7.05464e+06
P39	10	2	179	195	74	1.08939	6.336e+06
P39	10	2	162	169	91	1.04321	4.26902e+06
P39	10	2	161	184	64	1.14286	5.13472e+06
P39	10	2	179	227	68	1.26816	8.98079e+06
P39	10	2	154	135	71	0.876623	2.54554e+06
P39	10	2	165	163	83	0.987879	4.01024e+06
P39	14	2	172	199	75	1.15698	6.43817e+06
P39	14	2	158	150	71	0.949367	3.23764e+06
P39	14	2	164	183	86	1.11585	5.14172e+06
P39	14	2	171	162	74	0.947368	4.08632e+06
P39	14	2	172	171	69	0.994186	4.60471e+06
P39	14	2	178	179	77	1.00562	5.23018e+06
P39	14	2	158	156	63	0.987342	3.51712e+06
P39	14	2	179	179	72	1	5.25527e+06
P39	14	2	162	178	65	1.09877	4.78743e+06
P39	14	2	179	122	122	0.681564	2.48584e+06
P39	17	2	168	176	62	1.04762	4.80524e+06
P39	17	2	201	306	61	1.52239	1.98573e+07
P39	17	2	184	214	60	1.16304	7.97662e+06
P39	17	2	182	245	74	1.34615	1.0887e+07
P39	17	2	187	264	98	1.41176	1.32594e+07
P39	17	2	160	220	65	1.375	7.78695e+06
P39	17	2	184	229	70	1.24457	9.33249e+06
P39	17	2	203	283	85	1.39409	1.64472e+07
P39	17	2	165	167	69	1.01212	4.22407e+06
