# Supplementary material for: Diversity of Maize Shoot Apical Meristem Architecture and Its Relationship to Plant Morphology
Source: G3 (Bethesda). 2015 Mar 5;5(5):819–27. doi: 10.1534/g3.115.017541 (PMC4426368; doi:10.1534/g3.115.017541)
Supplement: Supporting Information [file supp_g3.115.017541_TableS11.xlsx]

## Sheet: Timecourse diverse raw
Supplementary data table S11. Raw SAM architecture data across timepoints for 18 diverse inbred lines
line	days_after_planting	rep	SAM_width	SAM_height	SAM_p1.p2.difference	SAM_height.width.ratio	SAM_volume
	(days)		(µm)	(µm)	(µm)		(µm3)
B73	7	1	155	179	103	1.15484	4.69181e+06
B73	7	2	140	172	64	1.22857	3.98817e+06
B73	7	3	154	176	93	1.14286	4.49367e+06
B73	7	4	144	161	65	1.11806	3.49615e+06
B73	7	5	151	183	73	1.21192	4.84743e+06
B73	10	1	182	234	117	1.28571	9.75263e+06
B73	10	2	170	259	77	1.52353	1.20364e+07
B73	10	3	171	224	78	1.30994	8.45711e+06
B73	10	4	174	232	85	1.33333	9.29659e+06
B73	10	5	159	241	70	1.51572	9.72168e+06
B97	7	1	156	96	25	0.615385	1.38069e+06
B97	7	2	144	57	52	0.395833	561118
B97	7	3	149	78	60	0.52349	928502
B97	7	4	142	80	24	0.56338	901553
B97	7	5	141	75	15	0.531915	806436
B97	10	1	156	97	64	0.621795	1.40488e+06
B97	10	2	164	112	73	0.682927	1.91856e+06
B97	10	3	175	121	69	0.691429	2.38278e+06
B97	10	4	147	94	77	0.639456	1.23256e+06
B97	10	5	179	137	70	0.765363	3.07015e+06
CM37	7	1	136	95	48	0.698529	1.13894e+06
CM37	7	2	156	110	77	0.705128	1.74815e+06
CM37	7	3	147	104	54	0.707483	1.4715e+06
CM37	7	4	189	168	92	0.888889	4.83935e+06
CM37	7	5	NA	NA	NA	NA	NA
CM37	10	1	188	145	111	0.771277	3.60879e+06
CM37	10	2	186	133	85	0.715054	3.03875e+06
CM37	10	3	213	183	96	0.859155	6.46926e+06
CM37	10	4	173	130	63	0.751445	2.67825e+06
CM37	10	5	181	145	109	0.801105	3.46171e+06
CML277	7	1	147	89	82	0.605442	1.12436e+06
CML277	7	2	147	89	27	0.605442	1.12436e+06
CML277	7	3	137	85	58	0.620438	948053
CML277	7	4	111	64	42	0.576577	446918
CML277	7	5	129	85	59	0.658915	877021
CML277	10	1	130	99	64	0.761538	1.16507e+06
CML277	10	2	122	87	71	0.713115	853300
CML277	10	3	138	102	74	0.73913	1.31846e+06
CML277	10	4	132	106	74	0.80303	1.34891e+06
CML277	10	5	123	82	64	0.666667	775869
CML61	7	1	130	67	60	0.515385	602132
CML61	7	2	137	79	73	0.576642	840429
CML61	7	3	123	71	45	0.577236	609222
CML61	7	4	134	95	69	0.708955	1.11879e+06
CML61	7	5	160	115	84	0.71875	1.95243e+06
CML61	10	1	160	118	56	0.7375	2.04655e+06
CML61	10	2	161	99	47	0.614907	1.51578e+06
CML61	10	3	158	93	59	0.588608	1.33287e+06
CML61	10	4	171	103	80	0.602339	1.75489e+06
CML61	10	5	173	116	83	0.67052	2.18064e+06
Co255	7	1	127	102	70	0.80315	1.2017e+06
Co255	7	2	125	110	70	0.88	1.37186e+06
Co255	7	3	122	102	89	0.836066	1.15183e+06
Co255	7	4	121	92	68	0.760331	936674
Co255	7	5	128	83	61	0.648438	833407
Co255	10	1	181	144	108	0.79558	3.41605e+06
Co255	10	2	178	166	74	0.932584	4.46051e+06
Co255	10	3	180	145	103	0.805556	3.44115e+06
Co255	10	4	174	142	96	0.816092	3.1875e+06
Co255	10	5	151	107	62	0.708609	1.5995e+06
CS405	7	1	141	175	83	1.24113	4.17243e+06
CS405	7	2	134	147	73	1.09701	2.69976e+06
CS405	7	3	148	175	101	1.18243	4.31145e+06
CS405	7	4	158	192	92	1.21519	5.58821e+06
CS405	7	5	164	209	82	1.27439	6.98756e+06
CS405	10	1	165	206	88	1.24848	6.77959e+06
CS405	10	2	164	193	89	1.17683	5.80265e+06
CS405	10	3	184	235	106	1.27717	9.91957e+06
CS405	10	4	166	189	79	1.13855	5.58016e+06
CS405	10	5	191	252	114	1.31937	1.19893e+07
Hp301	7	1	123	92	33	0.747967	954305
Hp301	7	2	120	84	28	0.7	785347
Hp301	7	3	122	75	23	0.614754	659263
Hp301	7	4	120	101	22	0.841667	1.1106e+06
Hp301	7	5	148	100	31	0.675676	1.38377e+06
Hp301	10	1	128	91	69	0.710938	980060
Hp301	10	2	149	114	75	0.765101	1.76962e+06
Hp301	10	3	134	108	79	0.80597	1.42112e+06
Hp301	10	4	126	92	81	0.730159	981292
Hp301	10	5	132	91	58	0.689394	1.01723e+06
IL14H	7	1	155	119	91	0.767742	2.00506e+06
IL14H	7	2	152	107	58	0.703947	1.61223e+06
IL14H	7	3	159	99	59	0.622642	1.4909e+06
IL14H	7	4	160	102	73	0.6375	1.58106e+06
IL14H	7	5	189	151	99	0.798942	3.92089e+06
IL14H	10	1	162	135	93	0.833333	2.67956e+06
IL14H	10	2	148	128	85	0.864865	2.19908e+06
IL14H	10	3	182	150	74	0.824176	3.71831e+06
IL14H	10	4	153	119	73	0.777778	1.97628e+06
IL14H	10	5	159	124	73	0.779874	2.22935e+06
Ki14	7	1	159	150	65	0.943396	3.25632e+06
Ki14	7	2	143	100	46	0.699301	1.32663e+06
Ki14	7	3	157	128	68	0.815287	2.33706e+06
Ki14	7	4	138	117	61	0.847826	1.71359e+06
Ki14	7	5	132	116	77	0.878788	1.611e+06
Ki14	10	1	142	110	93	0.774648	1.56793e+06
Ki14	10	2	132	103	75	0.780303	1.27692e+06
Ki14	10	3	173	154	49	0.890173	3.72229e+06
Ki14	10	4	139	112	70	0.805755	1.5854e+06
Ki14	10	5	148	91	59	0.614865	1.17732e+06
Mo17	7	1	132	85	69	0.643939	903157
Mo17	7	2	162	116	75	0.716049	2.01278e+06
Mo17	7	3	151	117	67	0.774834	1.88621e+06
Mo17	7	4	138	105	75	0.76087	1.39138e+06
Mo17	7	5	136	94	70	0.691176	1.11765e+06
Mo17	10	1	149	95	51	0.637584	1.27716e+06
Mo17	10	2	140	90	68	0.642857	1.07442e+06
Mo17	10	3	146	97	70	0.664384	1.28984e+06
Mo17	10	4	156	102	86	0.653846	1.53043e+06
Mo17	10	5	161	104	59	0.645963	1.64761e+06
Mo18W	7	1	155	153	46	0.987097	3.3188e+06
Mo18W	7	2	146	136	33	0.931507	2.45551e+06
Mo18W	7	3	152	137	41	0.901316	2.58935e+06
Mo18W	7	4	142	135	64	0.950704	2.35723e+06
Mo18W	7	5	143	149	21	1.04196	2.92855e+06
Mo18W	10	1	154	200	72	1.2987	6.05144e+06
Mo18W	10	2	162	153	96	0.944444	3.45212e+06
Mo18W	10	3	133	125	81	0.93985	1.89096e+06
Mo18W	10	4	142	129	91	0.908451	2.14547e+06
Mo18W	10	5	194	190	87	0.979381	6.39949e+06
Ms71	7	1	146	130	80	0.890411	2.23855e+06
Ms71	7	2	124	88	57	0.709677	888174
Ms71	7	3	147	128	84	0.870748	2.18425e+06
Ms71	7	4	147	112	75	0.761905	1.68603e+06
Ms71	7	5	111	55	53	0.495495	353228
Ms71	10	1	150	120	87	0.8	1.96506e+06
Ms71	10	2	164	157	73	0.957317	3.68451e+06
Ms71	10	3	131	77	75	0.587786	757951
Ms71	10	4	144	99	85	0.6875	1.3142e+06
Ms71	10	5	127	88	69	0.692913	914195
NC296	7	1	159	141	80	0.886792	2.86758e+06
NC296	7	2	115	89	50	0.773913	831337
NC296	7	3	132	106	59	0.80303	1.34891e+06
NC296	7	4	118	109	67	0.923729	1.27408e+06
NC296	7	5	135	105	73	0.777778	1.35761e+06
NC296	10	1	167	140	85	0.838323	2.97003e+06
NC296	10	2	129	100	83	0.775194	1.17709e+06
NC296	10	3	147	122	75	0.829932	1.98605e+06
NC296	10	4	144	97	74	0.673611	1.26775e+06
NC296	10	5	114	74	54	0.649123	589835
NC358	7	1	126	87	75	0.690476	887191
NC358	7	2	158	110	60	0.696203	1.77528e+06
NC358	7	3	148	104	65	0.702703	1.48355e+06
NC358	7	4	143	89	64	0.622378	1.08382e+06
NC358	7	5	133	80	37	0.601504	823798
NC358	10	1	153	99	59	0.647059	1.41812e+06
NC358	10	2	152	91	44	0.598684	1.2202e+06
NC358	10	3	148	94	49	0.635135	1.24345e+06
NC358	10	4	159	104	68	0.654088	1.62147e+06
NC358	10	5	146	92	66	0.630137	1.17783e+06
Oh43	7	1	133	87	59	0.654135	949132
Oh43	7	2	138	95	27	0.688406	1.15938e+06
Oh43	7	3	131	76	62	0.580153	742019
Oh43	7	4	142	112	48	0.788732	1.62248e+06
Oh43	7	5	147	98	66	0.666667	1.32442e+06
Oh43	10	1	164	127	79	0.77439	2.41391e+06
Oh43	10	2	178	153	66	0.859551	3.77897e+06
Oh43	10	3	172	134	63	0.77907	2.81659e+06
Oh43	10	4	185	151	62	0.816216	3.83218e+06
Oh43	10	5	164	130	71	0.792683	2.52341e+06
Oh7B	7	1	143	128	73	0.895105	2.12594e+06
Oh7B	7	2	135	122	78	0.903704	1.82392e+06
Oh7B	7	3	163	175	60	1.07362	4.63204e+06
Oh7B	7	4	128	93	76	0.726562	1.01952e+06
Oh7B	7	5	145	157	73	1.08276	3.32254e+06
Oh7B	10	1	139	128	105	0.920863	2.06924e+06
Oh7B	10	2	143	146	81	1.02098	2.80193e+06
Oh7B	10	3	143	132	100	0.923077	2.26426e+06
Oh7B	10	4	146	131	74	0.89726	2.27367e+06
Oh7B	10	5	142	124	72	0.873239	1.98018e+06
P39	7	1	161	149	99	0.925466	3.24873e+06
P39	7	2	163	150	88	0.920245	3.33219e+06
P39	7	3	176	178	81	1.01136	5.1182e+06
P39	7	4	148	141	71	0.952703	2.6806e+06
P39	7	5	174	170	97	0.977011	4.59363e+06
P39	10	1	151	146	63	0.966887	2.93678e+06
P39	10	2	171	198	77	1.15789	6.33799e+06
P39	10	3	146	169	68	1.15753	3.94197e+06
P39	10	4	165	163	71	0.987879	4.01024e+06
P39	10	5	150	156	65	1.04	3.36617e+06
B73	14	1	181	281	122	1.55249	1.52327e+07
B73	14	2	179	251	88	1.40223	1.1438e+07
B73	14	3	168	242	93	1.44048	1.01029e+07
B73	14	4	181	280	94	1.54696	1.50963e+07
B73	14	5	171	285	78	1.66667	1.53935e+07
B73	17	1	158	225	69	1.42405	8.16986e+06
B73	17	2	182	285	97	1.56593	1.58281e+07
B73	17	3	173	255	91	1.47399	1.1679e+07
B73	17	4	166	270	84	1.62651	1.32277e+07
B73	17	5	176	233	98	1.32386	9.45744e+06
B97	14	1	173	136	75	0.786127	2.91551e+06
B97	14	2	181	130	92	0.718232	2.82282e+06
B97	14	3	166	92	72	0.554217	1.40327e+06
B97	14	4	164	112	61	0.682927	1.91856e+06
B97	14	5	158	116	86	0.734177	1.95447e+06
B97	17	1	169	116	69	0.686391	2.11832e+06
B97	17	2	156	103	63	0.660256	1.55649e+06
B97	17	3	154	114	81	0.74026	1.83744e+06
B97	17	4	151	104	71	0.688742	1.52019e+06
B97	17	5	157	117	60	0.745223	1.97112e+06
CM37	14	1	237	253	96	1.06751	1.40598e+07
CM37	14	2	205	191	101	0.931707	6.80047e+06
CM37	14	3	220	177	99	0.804545	6.26765e+06
CM37	14	4	199	144	90	0.723618	3.80284e+06
CM37	14	5	234	250	127	1.06838	1.35569e+07
CM37	17	1	216	227	99	1.05093	1.02836e+07
CM37	17	2	204	190	88	0.931373	6.69645e+06
CM37	17	3	NA	NA	NA	NA	NA
CM37	17	4	214	162	90	0.757009	5.13951e+06
CM37	17	5	NA	NA	NA	NA	NA
CML277	14	1	144	106	60	0.736111	1.48677e+06
CML277	14	2	132	97	49	0.734848	1.14159e+06
CML277	14	3	150	124	77	0.826667	2.09393e+06
CML277	14	4	173	150	84	0.867052	3.53011e+06
CML277	14	5	142	105	59	0.739437	1.43756e+06
CML277	17	1	143	99	85	0.692308	1.30305e+06
CML277	17	2	138	100	54	0.724638	1.27145e+06
CML277	17	3	139	103	69	0.741007	1.35365e+06
CML277	17	4	149	120	83	0.805369	1.95097e+06
CML277	17	5	126	88	55	0.698413	905452
CML61	14	1	172	124	88	0.72093	2.43889e+06
CML61	14	2	204	159	134	0.779412	4.70316e+06
CML61	14	3	196	153	71	0.780612	4.18345e+06
CML61	14	4	173	119	75	0.687861	2.28096e+06
CML61	14	5	165	103	86	0.624242	1.67335e+06
CML61	17	1	149	103	70	0.691275	1.47014e+06
CML61	17	2	179	111	104	0.620112	2.11274e+06
CML61	17	3	154	100	75	0.649351	1.45492e+06
CML61	17	4	163	114	46	0.699387	1.96517e+06
CML61	17	5	160	114	84	0.7125	1.92179e+06
Co255	14	1	167	144	76	0.862275	3.14054e+06
Co255	14	2	215	200	85	0.930233	7.81929e+06
Co255	14	3	205	173	75	0.843902	5.56609e+06
Co255	14	4	181	129	72	0.712707	2.78361e+06
Co255	14	5	181	150	61	0.828729	3.69692e+06
Co255	17	1	196	129	67	0.658163	3.07009e+06
Co255	17	2	172	118	66	0.686047	2.23117e+06
Co255	17	3	191	136	72	0.712042	3.26543e+06
Co255	17	4	205	144	76	0.702439	3.93991e+06
Co255	17	5	210	162	59	0.771429	5.03161e+06
CS405	14	1	187	254	89	1.35829	1.20682e+07
CS405	14	2	192	286	76	1.48958	1.63891e+07
CS405	14	3	179	250	108	1.39665	1.13268e+07
CS405	14	4	141	182	81	1.29078	4.57747e+06
CS405	14	5	178	212	97	1.19101	7.62667e+06
CS405	17	1	179	165	90	0.921788	4.42818e+06
CS405	17	2	190	206	84	1.08421	7.49754e+06
CS405	17	3	193	218	81	1.12953	8.61342e+06
CS405	17	4	147	189	65	1.28571	5.13877e+06
CS405	17	5	181	153	49	0.845304	3.84368e+06
Hp301	14	1	142	114	66	0.802817	1.67843e+06
Hp301	14	2	168	136	107	0.809524	2.82445e+06
Hp301	14	3	147	149	68	1.01361	2.99642e+06
Hp301	14	4	141	125	71	0.886525	1.99856e+06
Hp301	14	5	148	125	88	0.844595	2.09786e+06
Hp301	17	1	139	109	52	0.784173	1.50509e+06
Hp301	17	2	143	91	57	0.636364	1.12533e+06
Hp301	17	3	148	113	74	0.763514	1.72749e+06
Hp301	17	4	159	156	99	0.981132	3.53654e+06
Hp301	17	5	141	110	75	0.780142	1.55571e+06
IL14H	14	1	194	187	77	0.963918	6.1877e+06
IL14H	14	2	181	139	74	0.767956	3.19445e+06
IL14H	14	3	192	151	77	0.786458	3.98867e+06
IL14H	14	4	212	172	74	0.811321	5.70001e+06
IL14H	14	5	NA	NA	NA	NA	NA
IL14H	17	1	215	178	97	0.827907	6.18411e+06
IL14H	17	2	217	179	94	0.824885	6.31304e+06
IL14H	17	3	189	160	115	0.846561	4.38907e+06
IL14H	17	4	201	171	110	0.850746	5.33109e+06
IL14H	17	5	201	134	99	0.666667	3.3858e+06
Ki14	14	1	164	105	92	0.640244	1.71514e+06
Ki14	14	2	179	147	91	0.821229	3.51284e+06
Ki14	14	3	167	125	103	0.748503	2.39165e+06
Ki14	14	4	184	137	89	0.744565	3.1678e+06
Ki14	14	5	127	103	96	0.811024	1.22454e+06
Ki14	17	1	158	89	81	0.563291	1.24162e+06
Ki14	17	2	184	146	67	0.793478	3.57061e+06
Ki14	17	3	167	110	83	0.658683	1.90163e+06
Ki14	17	4	153	90	70	0.588235	1.20904e+06
Ki14	17	5	161	113	79	0.701863	1.90574e+06
Mo17	14	1	201	161	83	0.800995	4.73946e+06
Mo17	14	2	178	127	95	0.713483	2.6527e+06
Mo17	14	3	173	126	51	0.728324	2.52828e+06
Mo17	14	4	172	129	83	0.75	2.62267e+06
Mo17	14	5	183	135	100	0.737705	3.06365e+06
Mo17	17	1	181	130	84	0.718232	2.82282e+06
Mo17	17	2	174	116	87	0.666667	2.19645e+06
Mo17	17	3	211	164	93	0.777251	5.17683e+06
Mo17	17	4	191	157	84	0.82199	4.27546e+06
Mo17	17	5	198	145	79	0.732323	3.82858e+06
Mo18W	14	1	NA	NA	NA	NA	NA
Mo18W	14	2	200	210	98	1.05	8.14771e+06
Mo18W	14	3	199	234	114	1.17588	1.03478e+07
Mo18W	14	4	169	173	77	1.02367	4.65139e+06
Mo18W	14	5	167	160	99	0.958084	3.89697e+06
Mo18W	17	1	209	203	103	0.971292	7.86228e+06
Mo18W	17	2	178	196	110	1.10112	6.38114e+06
Mo18W	17	3	182	183	97	1.00549	5.58928e+06
Mo18W	17	4	187	184	74	0.983957	5.7885e+06
Mo18W	17	5	186	185	88	0.994624	5.8286e+06
Ms71	14	1	151	139	61	0.92053	2.65078e+06
Ms71	14	2	112	80	52	0.714286	662163
Ms71	14	3	150	121	87	0.806667	1.99671e+06
Ms71	14	4	167	155	81	0.928144	3.64737e+06
Ms71	14	5	127	97	76	0.76378	1.09226e+06
Ms71	17	1	128	93	81	0.726562	1.01952e+06
Ms71	17	2	130	85	70	0.653846	885667
Ms71	17	3	153	123	92	0.803922	2.10505e+06
Ms71	17	4	144	104	59	0.722222	1.43585e+06
Ms71	17	5	171	147	89	0.859649	3.35121e+06
NC296	14	1	155	165	79	1.06452	3.90878e+06
NC296	14	2	146	127	74	0.869863	2.13562e+06
NC296	14	3	151	127	67	0.84106	2.20968e+06
NC296	14	4	170	201	81	1.18235	6.53308e+06
NC296	14	5	144	152	66	1.05556	3.07651e+06
NC296	17	1	151	98	55	0.649007	1.37029e+06
NC296	17	2	156	126	42	0.807692	2.25154e+06
NC296	17	3	137	130	68	0.948905	2.10852e+06
NC296	17	4	161	154	88	0.956522	3.47991e+06
NC296	17	5	136	98	60	0.720588	1.20462e+06
NC358	14	1	201	139	58	0.691542	3.61148e+06
NC358	14	2	170	91	66	0.535294	1.42733e+06
NC358	14	3	178	107	72	0.601124	1.97275e+06
NC358	14	4	159	99	41	0.622642	1.4909e+06
NC358	14	5	193	132	69	0.683938	3.13511e+06
NC358	17	1	180	119	60	0.661111	2.39644e+06
NC358	17	2	173	112	70	0.647399	2.05196e+06
NC358	17	3	188	128	51	0.680851	2.87465e+06
NC358	17	4	189	136	71	0.719577	3.22484e+06
NC358	17	5	178	118	68	0.662921	2.32848e+06
Oh43	14	1	200	182	70	0.91	6.0154e+06
Oh43	14	2	198	188	56	0.949495	6.37347e+06
Oh43	14	3	201	155	88	0.771144	4.40896e+06
Oh43	14	4	184	143	88	0.777174	3.43232e+06
Oh43	14	5	184	156	53	0.847826	4.06185e+06
Oh43	17	1	218	219	72	1.00459	9.58671e+06
Oh43	17	2	178	178	54	1	5.16769e+06
Oh43	17	3	211	240	71	1.13744	1.14342e+07
Oh43	17	4	221	261	80	1.181	1.43153e+07
Oh43	17	5	NA	NA	NA	NA	NA
Oh7B	14	1	175	180	97	1.02857	5.21838e+06
Oh7B	14	2	158	155	99	0.981013	3.46933e+06
Oh7B	14	3	191	248	120	1.29843	1.15393e+07
Oh7B	14	4	183	216	104	1.18033	8.1173e+06
Oh7B	14	5	173	200	106	1.15607	6.5394e+06
Oh7B	17	1	185	226	92	1.22162	9.08145e+06
Oh7B	17	2	170	186	101	1.09412	5.48019e+06
Oh7B	17	3	165	184	74	1.11515	5.22894e+06
Oh7B	17	4	164	183	93	1.11585	5.14172e+06
Oh7B	17	5	172	214	92	1.24419	7.61761e+06
P39	14	1	195	259	81	1.32821	1.29645e+07
P39	14	2	187	207	75	1.10695	7.48677e+06
P39	14	3	193	205	63	1.06218	7.50953e+06
P39	14	4	196	251	80	1.28061	1.20664e+07
P39	14	5	197	209	75	1.06091	7.96531e+06
P39	17	1	182	211	108	1.15934	7.66328e+06
P39	17	2	NA	NA	NA	NA	NA
P39	17	3	NA	NA	NA	NA	NA
P39	17	4	NA	NA	NA	NA	NA
P39	17	5	NA	NA	NA	NA	NA
B73	21	1	159	218	82	1.37107	7.58886e+06
B73	21	2	168	299	83	1.77976	1.73102e+07
B73	21	3	184	277	92	1.50543	1.48113e+07
B73	21	4	172	284	80	1.65116	1.52931e+07
B73	21	5	175	302	97	1.72571	1.80538e+07
B73	28	1	166	249	97	1.5	1.07779e+07
B73	28	2	183	312	59	1.70492	2.00055e+07
B73	28	3	171	290	77	1.69591	1.61001e+07
B73	28	4	159	241	69	1.51572	9.72168e+06
B73	28	5	180	279	56	1.55	1.49212e+07
B97	21	1	155	110	64	0.709677	1.73471e+06
B97	21	2	154	102	76	0.662338	1.5056e+06
B97	21	3	174	131	86	0.752874	2.7346e+06
B97	21	4	164	123	57	0.75	2.27348e+06
B97	21	5	142	92	55	0.647887	1.13621e+06
B97	28	1	249	283	32	1.13655	1.87579e+07
B97	28	2	199	204	54	1.02513	7.61763e+06
B97	28	3	NA	NA	NA	NA	NA
B97	28	4	NA	NA	NA	NA	NA
B97	28	5	NA	NA	NA	NA	NA
CM37	21	1	223	240	44	1.07623	1.19251e+07
CM37	21	2	NA	NA	NA	NA	NA
CM37	21	3	NA	NA	NA	NA	NA
CM37	21	4	NA	NA	NA	NA	NA
CM37	21	5	NA	NA	NA	NA	NA
CM37	28	1	NA	NA	NA	NA	NA
CM37	28	2	NA	NA	NA	NA	NA
CM37	28	3	NA	NA	NA	NA	NA
CM37	28	4	NA	NA	NA	NA	NA
CM37	28	5	NA	NA	NA	NA	NA
CML277	21	1	135	96	67	0.711111	1.15031e+06
CML277	21	2	141	114	72	0.808511	1.66576e+06
CML277	21	3	122	94	56	0.770492	984316
CML277	21	4	156	148	73	0.948718	3.11179e+06
CML277	21	5	154	143	75	0.928571	2.8629e+06
CML277	28	1	145	128	76	0.882759	2.1549e+06
CML277	28	2	134	108	77	0.80597	1.42112e+06
CML277	28	3	147	132	75	0.897959	2.32439e+06
CML277	28	4	139	115	70	0.827338	1.66887e+06
CML277	28	5	142	113	73	0.795775	1.65028e+06
CML61	21	1	164	97	87	0.591463	1.50239e+06
CML61	21	2	150	78	67	0.52	937661
CML61	21	3	153	94	60	0.614379	1.299e+06
CML61	21	4	121	83	69	0.68595	776595
CML61	21	5	192	120	86	0.625	2.64195e+06
CML61	28	1	154	84	64	0.545455	1.09265e+06
CML61	28	2	149	86	45	0.577181	1.08281e+06
CML61	28	3	154	102	65	0.662338	1.5056e+06
CML61	28	4	153	100	48	0.653595	1.44287e+06
CML61	28	5	138	81	54	0.586957	884025
Co255	21	1	189	229	64	1.21164	9.50021e+06
Co255	21	2	NA	NA	NA	NA	NA
Co255	21	3	NA	NA	NA	NA	NA
Co255	21	4	NA	NA	NA	NA	NA
Co255	21	5	NA	NA	NA	NA	NA
Co255	28	1	NA	NA	NA	NA	NA
Co255	28	2	NA	NA	NA	NA	NA
Co255	28	3	NA	NA	NA	NA	NA
Co255	28	4	NA	NA	NA	NA	NA
Co255	28	5	NA	NA	NA	NA	NA
CS405	21	1	175	173	77	0.988571	4.79161e+06
CS405	21	2	181	211	71	1.16575	7.6332e+06
CS405	21	3	187	213	80	1.13904	7.98482e+06
CS405	21	4	194	287	94	1.47938	1.66196e+07
CS405	21	5	163	190	77	1.16564	5.57375e+06
CS405	28	1	NA	NA	NA	NA	NA
CS405	28	2	NA	NA	NA	NA	NA
CS405	28	3	NA	NA	NA	NA	NA
CS405	28	4	NA	NA	NA	NA	NA
CS405	28	5	NA	NA	NA	NA	NA
Hp301	21	1	161	153	83	0.950311	3.43272e+06
Hp301	21	2	186	203	74	1.0914	7.13804e+06
Hp301	21	3	161	117	58	0.726708	2.02956e+06
Hp301	21	4	168	125	93	0.744048	2.40809e+06
Hp301	21	5	176	173	86	0.982955	4.81546e+06
Hp301	28	1	NA	NA	NA	NA	NA
Hp301	28	2	NA	NA	NA	NA	NA
Hp301	28	3	NA	NA	NA	NA	NA
Hp301	28	4	NA	NA	NA	NA	NA
Hp301	28	5	NA	NA	NA	NA	NA
IL14H	21	1	224	312	104	1.39286	2.205e+07
IL14H	21	2	215	159	99	0.739535	4.99094e+06
IL14H	21	3	159	113	71	0.710692	1.87734e+06
IL14H	21	4	NA	NA	NA	NA	NA
IL14H	21	5	NA	NA	NA	NA	NA
IL14H	28	1	NA	NA	NA	NA	NA
IL14H	28	2	NA	NA	NA	NA	NA
IL14H	28	3	NA	NA	NA	NA	NA
IL14H	28	4	NA	NA	NA	NA	NA
IL14H	28	5	NA	NA	NA	NA	NA
Ki14	21	1	186	149	88	0.801075	3.75632e+06
Ki14	21	2	167	113	71	0.676647	1.99307e+06
Ki14	21	3	153	81	82	0.529412	1.02287e+06
Ki14	21	4	160	102	85	0.6375	1.58106e+06
Ki14	21	5	140	67	36	0.478571	673171
Ki14	28	1	141	78	65	0.553191	857440
Ki14	28	2	178	139	98	0.780899	3.13566e+06
Ki14	28	3	144	90	63	0.625	1.11457e+06
Ki14	28	4	162	96	63	0.592593	1.45262e+06
Ki14	28	5	184	153	87	0.831522	3.90947e+06
Mo17	21	1	199	154	85	0.773869	4.30721e+06
Mo17	21	2	201	163	68	0.810945	4.85364e+06
Mo17	21	3	204	147	67	0.720588	4.06558e+06
Mo17	21	4	154	90	71	0.584416	1.2199e+06
Mo17	21	5	237	310	74	1.30802	2.24363e+07
Mo17	28	1	NA	NA	NA	NA	NA
Mo17	28	2	NA	NA	NA	NA	NA
Mo17	28	3	NA	NA	NA	NA	NA
Mo17	28	4	NA	NA	NA	NA	NA
Mo17	28	5	NA	NA	NA	NA	NA
Mo18W	21	1	208	161	80	0.774038	4.92047e+06
Mo18W	21	2	196	209	86	1.06633	7.93306e+06
Mo18W	21	3	226	218	83	0.964602	9.79713e+06
Mo18W	21	4	234	209	114	0.893162	9.27415e+06
Mo18W	21	5	195	197	88	1.01026	6.94478e+06
Mo18W	28	1	189	161	115	0.851852	4.44357e+06
Mo18W	28	2	210	218	93	1.0381	9.19993e+06
Mo18W	28	3	217	207	87	0.953917	8.47198e+06
Mo18W	28	4	204	212	103	1.03922	8.45353e+06
Mo18W	28	5	234	207	120	0.884615	9.09522e+06
Ms71	21	1	158	147	82	0.93038	3.10431e+06
Ms71	21	2	152	127	55	0.835526	2.22479e+06
Ms71	21	3	127	84	57	0.661417	842381
Ms71	21	4	130	77	75	0.592308	750059
Ms71	21	5	NA	NA	NA	NA	NA
Ms71	28	1	NA	NA	NA	NA	NA
Ms71	28	2	NA	NA	NA	NA	NA
Ms71	28	3	NA	NA	NA	NA	NA
Ms71	28	4	NA	NA	NA	NA	NA
Ms71	28	5	NA	NA	NA	NA	NA
NC296	21	1	144	132	70	0.916667	2.27914e+06
NC296	21	2	148	137	78	0.925676	2.52479e+06
NC296	21	3	165	140	47	0.848485	2.93353e+06
NC296	21	4	149	154	76	1.03356	3.25494e+06
NC296	21	5	168	186	71	1.10714	5.43082e+06
NC296	28	1	145	129	85	0.889655	2.18909e+06
NC296	28	2	NA	NA	NA	NA	NA
NC296	28	3	189	211	76	1.1164	7.87847e+06
NC296	28	4	162	158	57	0.975309	3.69358e+06
NC296	28	5	156	185	84	1.1859	5.08322e+06
NC358	21	1	188	114	59	0.606383	2.358e+06
NC358	21	2	214	148	70	0.691589	4.35903e+06
NC358	21	3	187	114	60	0.609626	2.34121e+06
NC358	21	4	184	103	49	0.559783	1.94156e+06
NC358	21	5	188	116	67	0.617021	2.42731e+06
NC358	28	1	200	173	63	0.865	5.42852e+06
NC358	28	2	219	216	61	0.986301	9.34486e+06
NC358	28	3	NA	NA	NA	NA	NA
NC358	28	4	NA	NA	NA	NA	NA
NC358	28	5	NA	NA	NA	NA	NA
Oh43	21	1	NA	NA	NA	NA	NA
Oh43	21	2	NA	NA	NA	NA	NA
Oh43	21	3	NA	NA	NA	NA	NA
Oh43	21	4	NA	NA	NA	NA	NA
Oh43	21	5	NA	NA	NA	NA	NA
Oh43	28	1	NA	NA	NA	NA	NA
Oh43	28	2	NA	NA	NA	NA	NA
Oh43	28	3	NA	NA	NA	NA	NA
Oh43	28	4	NA	NA	NA	NA	NA
Oh43	28	5	NA	NA	NA	NA	NA
Oh7B	21	1	170	187	80	1.1	5.54618e+06
Oh7B	21	2	193	251	61	1.30052	1.19513e+07
Oh7B	21	3	172	207	63	1.20349	7.04903e+06
Oh7B	21	4	187	248	68	1.3262	1.1392e+07
Oh7B	21	5	178	210	91	1.17978	7.46192e+06
Oh7B	28	1	NA	NA	NA	NA	NA
Oh7B	28	2	NA	NA	NA	NA	NA
Oh7B	28	3	NA	NA	NA	NA	NA
Oh7B	28	4	NA	NA	NA	NA	NA
Oh7B	28	5	NA	NA	NA	NA	NA
P39	21	1	NA	NA	NA	NA	NA
P39	21	2	NA	NA	NA	NA	NA
P39	21	3	NA	NA	NA	NA	NA
P39	21	4	NA	NA	NA	NA	NA
P39	21	5	NA	NA	NA	NA	NA
P39	28	1	NA	NA	NA	NA	NA
P39	28	2	NA	NA	NA	NA	NA
P39	28	3	NA	NA	NA	NA	NA
P39	28	4	NA	NA	NA	NA	NA
P39	28	5	NA	NA	NA	NA	NA
