# Supplementary material for: Diversity of Maize Shoot Apical Meristem Architecture and Its Relationship to Plant Morphology
Source: G3 (Bethesda). 2015 Mar 5;5(5):819–27. doi: 10.1534/g3.115.017541 (PMC4426368; doi:10.1534/g3.115.017541)
Supplement: Supporting Information [file supp_g3.115.017541_TableS12.xlsx]

## Sheet: Timecourse combined mean
Supplementary data table S12. Line means by timepoint for all measured inbreds combined
line	days_after_planting	SAM_width	SAM_height	SAM_p1.p2.difference	SAM_height.width.ratio	SAM_volume
	(days)	(µm)	(µm)	(µm)		(µm3)
B73	7	148.8	174.2	79.6	1.17125	4.30345e+06
B97	7	146.4	77.2	35.2	0.526001	915660
CM37	7	157	119.25	67.75	0.750007	2.29948e+06
CML277	7	134.2	82.4	53.6	0.613363	904142
CML61	7	136.8	85.4	66.2	0.619394	1.0246e+06
CO255	7	124.6	97.8	71.6	0.785597	1.09909e+06
CS405	7	149	179.6	86.2	1.20203	4.75188e+06
Hp301	7	126.6	90.4	27.4	0.716013	978657
IL14H	7	163	115.6	76	0.706155	2.12203e+06
Ki14	7	145.8	122.2	63.4	0.83692	2.04892e+06
Mo17	7	143.8	103.4	71.2	0.717374	1.46223e+06
Mo18W	7	147.6	142	41	0.962516	2.72989e+06
Ms71	7	135	102.6	69.8	0.745647	1.47005e+06
NC296	7	131.8	110	65.8	0.833048	1.5359e+06
NC358	7	141.6	94	60.2	0.662653	1.21073e+06
Oh43	7	138.2	93.6	52.4	0.675619	1.15949e+06
Oh7B	7	142.8	135	72	0.93635	2.58479e+06
P39	7	164.4	157.6	87.2	0.957358	3.79467e+06
B73	10	171.2	238	85.4	1.39365	9.85288e+06
B97	10	164.2	112.2	70.6	0.680194	2.00179e+06
CM37	10	188.2	147.2	92.8	0.779607	3.85135e+06
CML277	10	129	95.2	69.4	0.736696	1.09232e+06
CML61	10	164.6	105.8	65	0.642775	1.76615e+06
CO255	10	172.8	140.8	88.6	0.811684	3.22094e+06
CS405	10	174	215	95.2	1.23208	8.01426e+06
Hp301	10	133.8	99.2	72.4	0.740312	1.23386e+06
IL14H	10	160.8	131.2	79.6	0.816005	2.56051e+06
Ki14	10	146.8	114	69.2	0.773149	1.86597e+06
Mo17	10	150.4	97.6	66.8	0.648927	1.36389e+06
Mo18W	10	157	159.4	85.4	1.01417	3.9879e+06
Ms71	10	143.2	108.2	77.8	0.745103	1.72718e+06
NC296	10	140.2	106.6	74.2	0.753237	1.59815e+06
NC358	10	151.6	96	57.2	0.633021	1.33622e+06
Oh43	10	172.6	139	68.2	0.804382	3.07301e+06
Oh7B	10	142.6	132.2	86.4	0.927084	2.27786e+06
P39	10	156.6	166.4	68.8	1.06204	4.11863e+06
B73	14	176	267.8	95	1.52177	1.34527e+07
B97	14	168.4	117.2	77.2	0.695136	2.20293e+06
CM37	14	219	203	102.6	0.919151	8.89753e+06
CML277	14	148.2	116.4	65.8	0.780823	1.93799e+06
CML61	14	182	131.6	90.8	0.718612	3.05596e+06
CO255	14	189.8	159.2	73.8	0.835569	4.60129e+06
CS405	14	175.4	236.8	90.2	1.34526	1.03977e+07
Hp301	14	149.2	129.8	80	0.871413	2.31914e+06
IL14H	14	194.75	162.25	75.5	0.832413	4.76771e+06
Ki14	14	164.2	123.4	94.2	0.753113	2.40239e+06
Mo17	14	181.4	135.6	82.4	0.746101	3.12135e+06
Mo18W	14	183.75	194.25	97	1.05191	6.76097e+06
Ms71	14	141.4	118.4	71.4	0.826681	2.00986e+06
NC296	14	153.2	154.4	73.4	1.00267	3.57273e+06
NC358	14	180.2	113.6	61.2	0.626908	2.32751e+06
Oh43	14	193.4	164.8	71	0.851128	4.8584e+06
Oh7B	14	176	199.8	105.2	1.12888	6.97674e+06
P39	14	193.6	226.2	74.8	1.16777	9.59849e+06
B73	17	171	253.6	87.8	1.48287	1.16724e+07
B97	17	157.4	110.8	68.8	0.704174	1.80071e+06
CM37	17	211.333	193	92.3333	0.913103	7.37319e+06
CML277	17	139	102	69.2	0.732347	1.35691e+06
CML61	17	161	108.4	75.8	0.674525	1.78495e+06
CO255	17	194.8	137.8	68	0.706024	3.50764e+06
CS405	17	178	186.2	73.8	1.05331	5.90432e+06
Hp301	17	146	115.8	71.4	0.789065	1.89003e+06
IL14H	17	204.6	164.4	103	0.803353	5.12062e+06
Ki14	17	164.6	109.6	76	0.66111	1.96573e+06
Mo17	17	191	142.4	85.4	0.743293	3.66003e+06
Mo18W	17	188.4	190.2	94.4	1.0113	6.28996e+06
Ms71	17	145.2	110.4	78.2	0.75324	1.75946e+06
NC296	17	148.2	121.2	62.6	0.816543	2.08297e+06
NC358	17	181.6	122.6	64	0.674372	2.57527e+06
Oh43	17	207	224.5	69.25	1.08076	1.0126e+07
Oh7B	17	171.2	198.6	90.4	1.15819	6.50998e+06
P39	17	182	211	108	1.15934	7.66328e+06
B73	21	171.6	276	86.8	1.60663	1.46115e+07
B97	21	157.8	111.6	67.6	0.704555	1.87692e+06
CM37	21	223	240	44	1.07623	1.19251e+07
CML277	21	141.6	119	68.6	0.833481	1.95502e+06
CML61	21	156	94.4	73.8	0.607359	1.43152e+06
CO255	21	189	229	64	1.21164	9.50021e+06
CS405	21	180	214.8	79.8	1.18768	8.52059e+06
Hp301	21	170.4	154.2	78.8	0.899084	3.96477e+06
IL14H	21	199.333	194.667	91.3333	0.947695	9.63944e+06
Ki14	21	161.2	102.4	72.4	0.624641	1.8053e+06
Mo17	21	199	172.8	73	0.839567	7.37653e+06
Mo18W	21	211.8	198.8	90.2	0.941677	7.77392e+06
Ms71	21	141.75	108.75	67.25	0.754908	1.73039e+06
NC296	21	154.8	149.8	68.4	0.966305	3.28464e+06
NC358	21	192.2	119	61	0.61688	2.68542e+06
Oh43	21	NA	NA	NA	NA	NA
Oh7B	21	180	220.6	72.6	1.222	8.6801e+06
P39	21	NA	NA	NA	NA	NA
B73	28	171.8	274.2	71.6	1.59331	1.43053e+07
B97	28	224	243.5	43	1.08084	1.31877e+07
CM37	28	NA	NA	NA	NA	NA
CML277	28	141.4	119.2	74.2	0.84196	1.84391e+06
CML61	28	149.6	90.6	55.2	0.605105	1.20159e+06
CO255	28	NA	NA	NA	NA	NA
CS405	28	NA	NA	NA	NA	NA
Hp301	28	NA	NA	NA	NA	NA
IL14H	28	NA	NA	NA	NA	NA
Ki14	28	161.8	111.2	75.2	0.676641	2.09395e+06
Mo17	28	NA	NA	NA	NA	NA
Mo18W	28	210.8	201	103.6	0.953539	7.93285e+06
Ms71	28	NA	NA	NA	NA	NA
NC296	28	163	170.75	75.5	1.04182	4.71109e+06
NC358	28	209.5	194.5	62	0.925651	7.38669e+06
Oh43	28	NA	NA	NA	NA	NA
Oh7B	28	NA	NA	NA	NA	NA
P39	28	NA	NA	NA	NA	NA
