# Supplementary material for: Diversity of Maize Shoot Apical Meristem Architecture and Its Relationship to Plant Morphology
Source: G3 (Bethesda). 2015 Mar 5;5(5):819–27. doi: 10.1534/g3.115.017541 (PMC4426368; doi:10.1534/g3.115.017541)
Supplement: Supporting Information [file supp_g3.115.017541_TableS13.xlsx]

## Sheet: NAM crosses raw
Supplementary data table S13. Raw SAM architecture measurements of NAM founders x B73/Mo17 and inbreds
number	rep	flat	row	plant	line	SAM_width	SAM_height	SAM_arc.length	SAM_midpoint.width
						(µm)	(µm)	(µm)	(µm)
17	1	1	2	7	B73	153	192	225	126
34	2	1	4	4	B73	NA	NA	NA	NA
66	3	1	7	6	B73	150	207	238	122
92	4	1	10	2	B73	160	159	191	125
110	5	1	11	10	B73	143	113	143	118
134	6	1	14	4	B73	NA	NA	NA	NA
161	7	2	17	1	B73	149	182	213	124
193	8	2	20	3	B73	165	146	184	138
221	9	2	23	1	B73	140	69	104	108
256	10	2	26	6	B73	159	193	226	129
277	11	2	28	7	B73	NA	NA	NA	NA
290	12	3	29	10	B73	145	193	222	125
318	13	3	32	8	B73	145	176	207	128
345	14	3	35	5	B73	152	197	228	128
382	15	3	39	2	B73	142	107	139	118
403	16	3	41	3	B73	145	185	215	120
439	17	4	44	9	B73	148	191	222	125
455	18	4	46	5	B73	150	187	219	124
483	19	4	49	3	B73	152	198	230	132
509	20	4	51	9	B73	158	152	187	129
19	1	1	2	9	B97	142	88	119	114
33	2	1	4	3	B97	136	80	115	114
65	3	1	7	5	B97	138	81	114	109
85	4	1	9	5	B97	138	113	149	124
106	5	1	11	6	B97	NA	NA	NA	NA
156	6	2	16	6	B97	148	101	136	122
175	7	2	18	5	B97	148	90	123	124
197	8	2	20	7	B97	132	63	98	102
230	9	2	23	10	B97	149	172	202	125
252	10	2	26	2	B97	145	71	109	113
275	11	2	28	5	B97	140	96	128	111
303	12	3	31	3	B97	157	144	181	128
335	13	3	34	5	B97	150	98	132	121
343	14	3	35	3	B97	146	95	129	119
375	15	3	38	5	B97	140	92	121	109
411	16	3	42	1	B97	157	118	154	126
421	17	4	43	1	B97	153	93	125	125
468	18	4	47	8	B97	142	99	131	123
469	19	4	47	9	B97	NA	NA	NA	NA
496	20	4	50	6	B97	150	86	120	118
5	1	1	1	5	B97xB	172	169	204	140
32	2	1	4	2	B97xB	157	141	172	126
53	3	1	6	3	B97xB	143	130	163	113
88	4	1	9	8	B97xB	128	79	112	108
120	5	1	12	10	B97xB	NA	NA	NA	NA
153	6	2	16	3	B97xB	NA	NA	NA	NA
178	7	2	18	8	B97xB	170	164	197	135
195	8	2	20	5	B97xB	151	128	160	121
216	9	2	22	6	B97xB	144	131	167	122
249	10	2	25	9	B97xB	NA	NA	NA	NA
261	11	2	27	1	B97xB	NA	NA	NA	NA
287	12	3	29	7	B97xB	131	92	119	108
321	13	3	33	1	B97xB	NA	NA	NA	NA
350	14	3	35	10	B97xB	NA	NA	NA	NA
390	15	3	39	10	B97xB	155	139	172	126
395	16	3	40	5	B97xB	150	146	175	119
440	17	4	44	10	B97xB	142	128	159	114
451	18	4	46	1	B97xB	159	153	189	132
487	19	4	49	7	B97xB	159	163	193	130
507	20	4	51	7	B97xB	150	86	125	120
7	1	1	1	7	B97xM	150	109	143	126
43	2	1	5	3	B97xM	158	90	132	124
71	3	1	8	1	B97xM	142	102	135	116
89	4	1	9	9	B97xM	155	88	124	129
113	5	1	12	3	B97xM	137	85	120	117
142	6	2	15	2	B97xM	141	108	135	112
176	7	2	18	6	B97xM	159	129	166	131
187	8	2	19	7	B97xM	142	81	116	114
226	9	2	23	6	B97xM	146	110	143	116
247	10	2	25	7	B97xM	160	109	144	130
272	11	2	28	2	B97xM	NA	NA	NA	NA
299	12	3	30	9	B97xM	NA	NA	NA	NA
319	13	3	32	9	B97xM	133	88	121	107
341	14	3	35	1	B97xM	NA	NA	NA	NA
374	15	3	38	4	B97xM	160	111	145	133
400	16	3	40	10	B97xM	155	107	144	129
432	17	4	44	2	B97xM	152	98	134	120
449	18	4	45	9	B97xM	164	136	174	137
484	19	4	49	4	B97xM	174	148	186	142
503	20	4	51	3	B97xM	153	109	144	124
18	1	1	2	8	Hp301	127	98	124	96
40	2	1	4	10	Hp301	108	74	105	98
57	3	1	6	7	Hp301	NA	NA	NA	NA
91	4	1	10	1	Hp301	160	124	159	137
115	5	1	12	5	Hp301	164	229	266	143
148	6	2	15	8	Hp301	122	106	132	100
174	7	2	18	4	Hp301	114	77	105	91
208	8	2	21	8	Hp301	126	86	116	105
210	9	2	21	10	Hp301	NA	NA	NA	NA
248	10	2	25	8	Hp301	NA	NA	NA	NA
281	11	3	29	1	Hp301	NA	NA	NA	NA
294	12	3	30	4	Hp301	152	168	200	131
323	13	3	33	3	Hp301	NA	NA	NA	NA
361	14	3	37	1	Hp301	147	130	164	122
373	15	3	38	3	Hp301	134	129	159	116
392	16	3	40	2	Hp301	NA	NA	NA	NA
437	17	4	44	7	Hp301	NA	NA	NA	NA
467	18	4	47	7	Hp301	NA	NA	NA	NA
478	19	4	48	8	Hp301	134	115	139	101
512	20	4	52	2	Hp301	NA	NA	NA	NA
26	1	1	3	6	Hp301xB	NA	NA	NA	NA
29	2	1	3	9	Hp301xB	NA	NA	NA	NA
77	3	1	8	7	Hp301xB	108	77	103	88
90	4	1	9	10	Hp301xB	141	132	161	118
117	5	1	12	7	Hp301xB	150	116	156	125
152	6	2	16	2	Hp301xB	NA	NA	NA	NA
168	7	2	17	8	Hp301xB	NA	NA	NA	NA
189	8	2	19	9	Hp301xB	130	116	144	109
232	9	2	24	2	Hp301xB	144	96	129	116
257	10	2	26	7	Hp301xB	NA	NA	NA	NA
276	11	2	28	6	Hp301xB	142	71	112	108
288	12	3	29	8	Hp301xB	163	173	207	137
325	13	3	33	5	Hp301xB	163	149	183	132
353	14	3	36	3	Hp301xB	NA	NA	NA	NA
378	15	3	38	8	Hp301xB	158	203	238	137
394	16	3	40	4	Hp301xB	NA	NA	NA	NA
441	17	4	45	1	Hp301xB	NA	NA	NA	NA
465	18	4	47	5	Hp301xB	NA	NA	NA	NA
472	19	4	48	2	Hp301xB	NA	NA	NA	NA
515	20	4	52	5	Hp301xB	148	144	175	120
4	1	1	1	4	Hp301xM	NA	NA	NA	NA
52	2	1	6	2	Hp301xM	NA	NA	NA	NA
72	3	1	8	2	Hp301xM	NA	NA	NA	NA
94	4	1	10	4	Hp301xM	157	127	166	129
111	5	1	12	1	Hp301xM	152	125	161	126
137	6	1	14	7	Hp301xM	150	202	234	133
160	7	2	16	10	Hp301xM	NA	NA	NA	NA
188	8	2	19	8	Hp301xM	114	74	103	97
219	9	2	22	9	Hp301xM	NA	NA	NA	NA
253	10	2	26	3	Hp301xM	NA	NA	NA	NA
273	11	2	28	3	Hp301xM	153	208	243	135
295	12	3	30	5	Hp301xM	144	123	157	119
314	13	3	32	4	Hp301xM	NA	NA	NA	NA
354	14	3	36	4	Hp301xM	NA	NA	NA	NA
367	15	3	37	7	Hp301xM	147	148	180	122
402	16	3	41	2	Hp301xM	NA	NA	NA	NA
436	17	4	44	6	Hp301xM	NA	NA	NA	NA
448	18	4	45	8	Hp301xM	NA	NA	NA	NA
479	19	4	48	9	Hp301xM	NA	NA	NA	NA
514	20	4	52	4	Hp301xM	164	193	228	140
1	1	1	1	1	IL14H	159	118	159	137
48	2	1	5	8	IL14H	179	126	165	141
76	3	1	8	6	IL14H	NA	NA	NA	NA
80	4	1	8	10	IL14H	179	157	197	144
123	5	1	13	3	IL14H	155	146	179	128
133	6	1	14	3	IL14H	171	186	225	156
158	7	2	16	8	IL14H	160	121	158	137
192	8	2	20	2	IL14H	146	97	133	121
227	9	2	23	7	IL14H	137	82	115	111
258	10	2	26	8	IL14H	160	125	164	135
283	11	3	29	3	IL14H	NA	NA	NA	NA
306	12	3	31	6	IL14H	172	129	168	140
332	13	3	34	2	IL14H	177	163	194	141
339	14	3	34	9	IL14H	134	75	111	113
376	15	3	38	6	IL14H	152	101	140	123
401	16	3	41	1	IL14H	NA	NA	NA	NA
420	17	3	42	10	IL14H	170	107	146	136
443	18	4	45	3	IL14H	151	107	145	129
475	19	4	48	5	IL14H	154	95	135	129
504	20	4	51	4	IL14H	160	163	195	129
21	1	1	3	1	IL14HxB	161	138	175	130
41	2	1	5	1	IL14HxB	154	138	172	126
58	3	1	6	8	IL14HxB	154	127	164	132
93	4	1	10	3	IL14HxB	157	131	166	129
126	5	1	13	6	IL14HxB	159	93	131	126
146	6	2	15	6	IL14HxB	172	170	207	145
180	7	2	18	10	IL14HxB	169	157	192	137
201	8	2	21	1	IL14HxB	148	143	177	127
213	9	2	22	3	IL14HxB	153	125	157	129
235	10	2	24	5	IL14HxB	154	122	156	121
268	11	2	27	8	IL14HxB	170	167	207	142
297	12	3	30	7	IL14HxB	146	144	176	119
324	13	3	33	4	IL14HxB	121	116	140	102
358	14	3	36	8	IL14HxB	154	133	169	133
379	15	3	38	9	IL14HxB	NA	NA	NA	NA
393	16	3	40	3	IL14HxB	155	154	188	131
418	17	3	42	8	IL14HxB	NA	NA	NA	NA
447	18	4	45	7	IL14HxB	157	163	201	135
473	19	4	48	3	IL14HxB	153	152	187	127
502	20	4	51	2	IL14HxB	155	186	219	131
11	1	1	2	1	IL14HxM	146	97	134	125
30	2	1	3	10	IL14HxM	145	104	136	114
68	3	1	7	8	IL14HxM	161	147	183	132
100	4	1	10	10	IL14HxM	127	107	137	113
114	5	1	12	4	IL14HxM	NA	NA	NA	NA
144	6	2	15	4	IL14HxM	167	134	173	138
157	7	2	16	7	IL14HxM	160	133	165	136
185	8	2	19	5	IL14HxM	168	147	180	133
212	9	2	22	2	IL14HxM	150	127	160	127
245	10	2	25	5	IL14HxM	167	127	167	136
285	11	3	29	5	IL14HxM	161	163	197	135
298	12	3	30	8	IL14HxM	154	123	158	128
328	13	3	33	8	IL14HxM	132	99	127	108
344	14	3	35	4	IL14HxM	NA	NA	NA	NA
365	15	3	37	5	IL14HxM	144	98	134	119
397	16	3	40	7	IL14HxM	144	114	147	120
419	17	3	42	9	IL14HxM	168	141	179	140
446	18	4	45	6	IL14HxM	167	124	161	136
476	19	4	48	6	IL14HxM	166	124	162	136
508	20	4	51	8	IL14HxM	160	115	156	133
13	1	1	2	3	Mo17	162	107	147	133
28	2	1	3	8	Mo17	152	94	134	122
75	3	1	8	5	Mo17	142	92	126	120
82	4	1	9	2	Mo17	172	147	185	137
125	5	1	13	5	Mo17	172	168	206	145
132	6	1	14	2	Mo17	143	98	129	111
164	7	2	17	4	Mo17	147	97	132	125
206	8	2	21	6	Mo17	138	101	134	117
224	9	2	23	4	Mo17	NA	NA	NA	NA
238	10	2	24	8	Mo17	158	125	162	133
282	11	3	29	2	Mo17	NA	NA	NA	NA
311	12	3	32	1	Mo17	NA	NA	NA	NA
316	13	3	32	6	Mo17	149	85	120	120
342	14	3	35	2	Mo17	148	102	139	126
380	15	3	38	10	Mo17	NA	NA	NA	NA
410	16	3	41	10	Mo17	161	118	153	131
433	17	4	44	3	Mo17	169	124	164	140
463	18	4	47	3	Mo17	140	80	113	113
486	19	4	49	6	Mo17	136	90	127	121
520	20	4	52	10	Mo17	143	101	137	124
12	1	1	2	2	Ms71	131	97	126	109
49	2	1	5	9	Ms71	126	97	126	107
63	3	1	7	3	Ms71	123	84	112	102
95	4	1	10	5	Ms71	148	120	152	121
107	5	1	11	7	Ms71	173	164	203	156
145	6	2	15	5	Ms71	136	88	121	110
172	7	2	18	2	Ms71	141	119	151	121
184	8	2	19	4	Ms71	138	85	116	111
214	9	2	22	4	Ms71	129	91	125	109
244	10	2	25	4	Ms71	126	85	117	108
262	11	2	27	2	Ms71	155	144	176	127
307	12	3	31	7	Ms71	131	86	117	108
336	13	3	34	6	Ms71	137	90	117	111
348	14	3	35	8	Ms71	130	82	117	109
381	15	3	39	1	Ms71	143	102	134	116
416	16	3	42	6	Ms71	122	93	122	104
430	17	4	43	10	Ms71	NA	NA	NA	NA
450	18	4	45	10	Ms71	141	116	149	121
470	19	4	47	10	Ms71	125	81	113	108
506	20	4	51	6	Ms71	136	132	161	117
15	1	1	2	5	Ms71xB	NA	NA	NA	NA
39	2	1	4	9	Ms71xB	141	145	176	116
56	3	1	6	6	Ms71xB	142	132	159	115
103	4	1	11	3	Ms71xB	152	117	150	120
130	5	1	13	10	Ms71xB	138	134	165	116
131	6	1	14	1	Ms71xB	144	104	140	122
182	7	2	19	2	Ms71xB	144	168	198	124
207	8	2	21	7	Ms71xB	133	85	123	113
234	9	2	24	4	Ms71xB	126	103	134	110
254	10	2	26	4	Ms71xB	144	144	171	118
264	11	2	27	4	Ms71xB	142	126	159	118
291	12	3	30	1	Ms71xB	NA	NA	NA	NA
320	13	3	32	10	Ms71xB	146	161	194	120
364	14	3	37	4	Ms71xB	152	135	173	129
387	15	3	39	7	Ms71xB	145	147	180	125
396	16	3	40	6	Ms71xB	141	126	157	118
425	17	4	43	5	Ms71xB	139	132	164	124
462	18	4	47	2	Ms71xB	143	128	161	120
490	19	4	49	10	Ms71xB	141	133	163	119
500	20	4	50	10	Ms71xB	142	127	161	119
22	1	1	3	2	Ms71xM	156	118	150	125
47	2	1	5	7	Ms71xM	146	110	143	125
60	3	1	6	10	Ms71xM	154	119	152	124
96	4	1	10	6	Ms71xM	135	88	121	111
129	5	1	13	9	Ms71xM	153	130	159	124
140	6	1	14	10	Ms71xM	152	157	193	129
179	7	2	18	9	Ms71xM	143	104	135	113
202	8	2	21	2	Ms71xM	144	126	158	119
223	9	2	23	3	Ms71xM	132	66	101	104
246	10	2	25	6	Ms71xM	139	104	134	114
278	11	2	28	8	Ms71xM	NA	NA	NA	NA
305	12	3	31	5	Ms71xM	146	119	148	121
317	13	3	32	7	Ms71xM	152	126	159	129
362	14	3	37	2	Ms71xM	148	101	137	121
368	15	3	37	8	Ms71xM	138	100	133	113
414	16	3	42	4	Ms71xM	139	106	136	114
442	17	4	45	2	Ms71xM	153	117	151	126
445	18	4	45	5	Ms71xM	136	90	130	118
491	19	4	50	1	Ms71xM	140	107	137	114
510	20	4	51	10	Ms71xM	147	142	176	126
2	1	1	1	2	NC358	168	123	162	130
51	2	1	6	1	NC358	122	72	102	97
70	3	1	7	10	NC358	141	94	128	113
83	4	1	9	3	NC358	163	147	182	131
109	5	1	11	9	NC358	165	140	172	124
136	6	1	14	6	NC358	147	152	179	116
171	7	2	18	1	NC358	135	91	118	108
183	8	2	19	3	NC358	132	82	118	109
228	9	2	23	8	NC358	NA	NA	NA	NA
239	10	2	24	9	NC358	138	116	146	112
274	11	2	28	4	NC358	156	120	151	123
308	12	3	31	8	NC358	144	86	121	116
334	13	3	34	4	NC358	129	78	110	103
347	14	3	35	7	NC358	NA	NA	NA	NA
386	15	3	39	6	NC358	159	147	180	125
413	16	3	42	3	NC358	135	93	127	111
426	17	4	43	6	NC358	147	97	128	116
459	18	4	46	9	NC358	140	96	128	114
489	19	4	49	9	NC358	132	70	105	109
519	20	4	52	9	NC358	129	113	140	100
20	1	1	2	10	NC358xB	147	156	190	124
36	2	1	4	6	NC358xB	137	138	167	119
59	3	1	6	9	NC358xB	133	132	161	115
81	4	1	9	1	NC358xB	NA	NA	NA	NA
119	5	1	12	9	NC358xB	153	131	167	130
155	6	2	16	5	NC358xB	137	144	174	116
170	7	2	17	10	NC358xB	137	123	151	110
196	8	2	20	6	NC358xB	128	118	145	107
220	9	2	22	10	NC358xB	133	134	165	115
243	10	2	25	3	NC358xB	146	136	169	122
269	11	2	27	9	NC358xB	149	127	160	125
296	12	3	30	6	NC358xB	153	172	201	125
331	13	3	34	1	NC358xB	165	186	222	137
340	14	3	34	10	NC358xB	141	137	166	118
372	15	3	38	2	NC358xB	159	141	174	130
398	16	3	40	8	NC358xB	141	143	172	113
429	17	4	43	9	NC358xB	155	164	195	127
466	18	4	47	6	NC358xB	145	154	181	115
485	19	4	49	5	NC358xB	156	175	204	129
495	20	4	50	5	NC358xB	135	137	166	111
16	1	1	2	6	NC358xM	142	101	132	113
45	2	1	5	5	NC358xM	130	96	121	103
61	3	1	7	1	NC358xM	147	124	158	120
102	4	1	11	2	NC358xM	131	79	111	105
108	5	1	11	8	NC358xM	159	158	194	134
139	6	1	14	9	NC358xM	149	97	130	121
162	7	2	17	2	NC358xM	148	114	147	114
190	8	2	19	10	NC358xM	125	91	120	102
209	9	2	21	9	NC358xM	NA	NA	NA	NA
236	10	2	24	6	NC358xM	158	143	180	133
286	11	3	29	6	NC358xM	159	129	168	136
304	12	3	31	4	NC358xM	137	104	135	112
327	13	3	33	7	NC358xM	157	129	162	127
346	14	3	35	6	NC358xM	142	108	138	113
388	15	3	39	8	NC358xM	129	94	124	110
406	16	3	41	6	NC358xM	126	91	120	104
434	17	4	44	4	NC358xM	148	115	146	120
457	18	4	46	7	NC358xM	140	101	128	113
492	19	4	50	2	NC358xM	133	81	111	102
498	20	4	50	8	NC358xM	144	113	142	110
9	1	1	1	9	Oh43	140	104	142	122
35	2	1	4	5	Oh43	138	101	135	118
74	3	1	8	4	Oh43	133	80	113	110
86	4	1	9	6	Oh43	149	96	128	122
118	5	1	12	8	Oh43	179	145	187	144
150	6	2	15	10	Oh43	140	88	122	115
169	7	2	17	9	Oh43	147	88	125	121
191	8	2	20	1	Oh43	NA	NA	NA	NA
217	9	2	22	7	Oh43	NA	NA	NA	NA
260	10	2	26	10	Oh43	143	104	137	120
280	11	2	28	10	Oh43	NA	NA	NA	NA
301	12	3	31	1	Oh43	NA	NA	NA	NA
338	13	3	34	8	Oh43	130	86	115	110
356	14	3	36	6	Oh43	125	75	108	105
389	15	3	39	9	Oh43	130	77	114	109
399	16	3	40	9	Oh43	151	98	134	130
424	17	4	43	4	Oh43	140	90	127	120
452	18	4	46	2	Oh43	142	83	120	114
494	19	4	50	4	Oh43	NA	NA	NA	NA
511	20	4	52	1	Oh43	154	90	127	126
14	1	1	2	4	Oh43xB	147	129	161	124
44	2	1	5	4	Oh43xB	156	137	174	136
73	3	1	8	3	Oh43xB	140	125	155	118
98	4	1	10	8	Oh43xB	NA	NA	NA	NA
112	5	1	12	2	Oh43xB	165	180	212	125
147	6	2	15	7	Oh43xB	152	136	171	125
173	7	2	18	3	Oh43xB	NA	NA	NA	NA
198	8	2	20	8	Oh43xB	158	130	163	126
222	9	2	23	2	Oh43xB	142	135	163	114
242	10	2	25	2	Oh43xB	148	138	170	122
284	11	3	29	4	Oh43xB	145	98	135	121
302	12	3	31	2	Oh43xB	163	128	168	140
329	13	3	33	9	Oh43xB	164	135	172	133
357	14	3	36	7	Oh43xB	147	116	154	124
366	15	3	37	6	Oh43xB	135	138	169	114
404	16	3	41	4	Oh43xB	154	141	174	132
427	17	4	43	7	Oh43xB	159	153	189	134
460	18	4	46	10	Oh43xB	157	135	171	134
493	19	4	50	3	Oh43xB	149	133	166	124
518	20	4	52	8	Oh43xB	148	146	177	121
6	1	1	1	6	Oh43xM	140	93	126	115
42	2	1	5	2	Oh43xM	135	83	116	110
67	3	1	7	7	Oh43xM	153	109	145	124
101	4	1	11	1	Oh43xM	158	196	224	127
124	5	1	13	4	Oh43xM	146	103	141	134
149	6	2	15	9	Oh43xM	172	138	179	140
163	7	2	17	3	Oh43xM	149	98	135	121
205	8	2	21	5	Oh43xM	135	92	127	119
233	9	2	24	3	Oh43xM	157	108	147	127
240	10	2	24	10	Oh43xM	NA	NA	NA	NA
267	11	2	27	7	Oh43xM	169	128	167	136
310	12	3	31	10	Oh43xM	172	137	175	143
337	13	3	34	7	Oh43xM	NA	NA	NA	NA
351	14	3	36	1	Oh43xM	144	94	132	121
369	15	3	37	9	Oh43xM	NA	NA	NA	NA
415	16	3	42	5	Oh43xM	NA	NA	NA	NA
428	17	4	43	8	Oh43xM	147	101	137	122
453	18	4	46	3	Oh43xM	150	106	143	127
480	19	4	48	10	Oh43xM	NA	NA	NA	NA
499	20	4	50	9	Oh43xM	159	130	166	130
24	1	1	3	4	Oh7B	131	114	146	115
46	2	1	5	6	Oh7B	131	113	140	110
62	3	1	7	2	Oh7B	136	125	153	114
99	4	1	10	9	Oh7B	168	220	255	139
105	5	1	11	5	Oh7B	144	92	128	122
135	6	1	14	5	Oh7B	132	104	137	114
181	7	2	19	1	Oh7B	148	111	144	121
199	8	2	20	9	Oh7B	133	97	129	108
231	9	2	24	1	Oh7B	148	107	141	123
237	10	2	24	7	Oh7B	NA	NA	NA	NA
270	11	2	27	10	Oh7B	141	119	151	115
309	12	3	31	9	Oh7B	137	133	163	117
326	13	3	33	6	Oh7B	169	154	190	135
363	14	3	37	3	Oh7B	146	112	144	119
370	15	3	37	10	Oh7B	NA	NA	NA	NA
408	16	3	41	8	Oh7B	126	116	146	107
417	17	3	42	7	Oh7B	128	118	149	113
454	18	4	46	4	Oh7B	122	81	111	104
482	19	4	49	2	Oh7B	132	112	148	119
505	20	4	51	5	Oh7B	153	129	163	123
10	1	1	1	10	Oh7BxB	144	165	194	124
27	2	1	3	7	Oh7BxB	141	125	160	119
64	3	1	7	4	Oh7BxB	134	126	156	112
87	4	1	9	7	Oh7BxB	160	193	227	134
121	5	1	13	1	Oh7BxB	136	131	163	115
151	6	2	16	1	Oh7BxB	142	144	174	115
166	7	2	17	6	Oh7BxB	133	129	161	112
194	8	2	20	4	Oh7BxB	132	146	174	111
229	9	2	23	9	Oh7BxB	161	148	184	137
241	10	2	25	1	Oh7BxB	141	150	181	119
266	11	2	27	6	Oh7BxB	145	131	162	117
300	12	3	30	10	Oh7BxB	143	146	176	119
315	13	3	32	5	Oh7BxB	144	158	190	120
355	14	3	36	5	Oh7BxB	136	152	180	113
377	15	3	38	7	Oh7BxB	135	129	159	110
409	16	3	41	9	Oh7BxB	149	168	198	124
435	17	4	44	5	Oh7BxB	144	153	186	118
456	18	4	46	6	Oh7BxB	136	123	151	115
481	19	4	49	1	Oh7BxB	141	149	177	113
516	20	4	52	6	Oh7BxB	NA	NA	NA	NA
23	1	1	3	3	Oh7BxM	134	109	140	110
37	2	1	4	7	Oh7BxM	138	113	143	113
69	3	1	7	9	Oh7BxM	141	123	154	119
79	4	1	8	9	Oh7BxM	138	122	155	116
128	5	1	13	8	Oh7BxM	150	116	154	129
141	6	2	15	1	Oh7BxM	138	103	135	112
159	7	2	16	9	Oh7BxM	150	132	166	123
204	8	2	21	4	Oh7BxM	132	116	145	108
218	9	2	22	8	Oh7BxM	148	84	117	115
259	10	2	26	9	Oh7BxM	137	117	147	112
265	11	2	27	5	Oh7BxM	135	109	139	110
293	12	3	30	3	Oh7BxM	139	129	163	121
322	13	3	33	2	Oh7BxM	NA	NA	NA	NA
360	14	3	36	10	Oh7BxM	137	112	142	112
385	15	3	39	5	Oh7BxM	158	129	166	129
391	16	3	40	1	Oh7BxM	149	153	180	121
423	17	4	43	3	Oh7BxM	142	119	150	112
444	18	4	45	4	Oh7BxM	140	116	148	117
474	19	4	48	4	Oh7BxM	137	98	136	120
497	20	4	50	7	Oh7BxM	142	127	158	115
25	1	1	3	5	P39	131	118	149	114
50	2	1	5	10	P39	154	168	207	141
55	3	1	6	5	P39	168	188	228	146
104	4	1	11	4	P39	134	90	123	114
127	5	1	13	7	P39	165	127	161	138
138	6	1	14	8	P39	149	87	126	124
167	7	2	17	7	P39	NA	NA	NA	NA
200	8	2	20	10	P39	150	157	189	132
215	9	2	22	5	P39	160	131	163	140
250	10	2	25	10	P39	176	167	212	162
263	11	2	27	3	P39	169	131	174	146
312	12	3	32	2	P39	NA	NA	NA	NA
330	13	3	33	10	P39	154	129	166	129
352	14	3	36	2	P39	176	119	163	144
383	15	3	39	3	P39	NA	NA	NA	NA
412	16	3	42	2	P39	176	172	212	155
438	17	4	44	8	P39	158	143	182	143
458	18	4	46	8	P39	172	134	179	144
477	19	4	48	7	P39	166	152	193	150
501	20	4	51	1	P39	159	136	173	130
8	1	1	1	8	P39xB	172	189	225	141
31	2	1	4	1	P39xB	151	191	223	134
78	3	1	8	8	P39xB	176	260	294	150
84	4	1	9	4	P39xB	NA	NA	NA	NA
116	5	1	12	6	P39xB	146	144	172	122
143	6	2	15	3	P39xB	161	210	251	141
165	7	2	17	5	P39xB	180	225	262	152
203	8	2	21	3	P39xB	144	174	210	129
211	9	2	22	1	P39xB	160	188	224	136
255	10	2	26	5	P39xB	NA	NA	NA	NA
271	11	2	28	1	P39xB	NA	NA	NA	NA
292	12	3	30	2	P39xB	NA	NA	NA	NA
333	13	3	34	3	P39xB	154	186	222	133
359	14	3	36	9	P39xB	164	199	233	142
371	15	3	38	1	P39xB	146	89	124	121
407	16	3	41	7	P39xB	153	211	244	135
431	17	4	44	1	P39xB	152	222	257	130
461	18	4	47	1	P39xB	147	181	212	132
488	19	4	49	8	P39xB	163	238	272	142
517	20	4	52	7	P39xB	NA	NA	NA	NA
3	1	1	1	3	P39xM	175	183	224	146
38	2	1	4	8	P39xM	157	147	182	129
54	3	1	6	4	P39xM	155	144	178	129
97	4	1	10	7	P39xM	NA	NA	NA	NA
122	5	1	13	2	P39xM	149	114	146	124
154	6	2	16	4	P39xM	155	144	179	131
177	7	2	18	7	P39xM	157	152	185	130
186	8	2	19	6	P39xM	170	164	199	132
225	9	2	23	5	P39xM	160	117	150	132
251	10	2	26	1	P39xM	161	157	190	135
279	11	2	28	9	P39xM	157	127	160	126
289	12	3	29	9	P39xM	149	141	173	126
313	13	3	32	3	P39xM	160	172	210	140
349	14	3	35	9	P39xM	156	153	188	131
384	15	3	39	4	P39xM	158	168	201	138
405	16	3	41	5	P39xM	161	160	199	133
422	17	4	43	2	P39xM	150	136	168	129
464	18	4	47	4	P39xM	150	130	167	124
471	19	4	48	1	P39xM	144	122	151	119
513	20	4	52	3	P39xM	152	116	150	121
