# Supplementary material for: Diversity of Maize Shoot Apical Meristem Architecture and Its Relationship to Plant Morphology
Source: G3 (Bethesda). 2015 Mar 5;5(5):819–27. doi: 10.1534/g3.115.017541 (PMC4426368; doi:10.1534/g3.115.017541)
Supplement: Supporting Information [file supp_g3.115.017541_TableS14.xlsx]

## Sheet: NAM crosses mean
Supplementary data table 14. Line means for NAM x B73/Mo17 and inbreds
line	SAM_width	SAM_height	SAM_arc.length	SAM_midpoint.width	SAM_height.width.ratio
	(µm)	(µm)	(µm)	(µm)
B97	145	88.75	122.812	117.625	0.610149
B97xB	155.5	144.786	177.786	126	0.929553
B97xM	157.867	116.067	152.467	128.467	0.731544
Hp301	125.889	102.222	130	102.889	0.805185
Hp301xB	125.333	103	131	103	0.815283
Hp301xM	114	74	103	97	0.649123
IL14H	158.429	112.857	150.857	131.143	0.706507
IL14HxB	159.2	148.667	184.6	133.4	0.932903
IL14HxM	158.133	124.533	160.4	130.6	0.786111
Ms71	134.722	97.8333	129.389	112.278	0.722771
Ms71xB	142.933	135.933	168.133	120.467	0.948711
Ms71xM	146.429	112.5	145.5	120.643	0.767133
NC358	137.938	91.6875	124.75	111.375	0.659562
NC358xB	143.944	145.333	175.611	119.222	1.00667
NC358xM	141.75	106.625	137.125	112.5	0.749434
Oh43	138.467	91.5333	126.533	117.267	0.660435
Oh43xB	152.667	133.267	167.667	127.733	0.872736
Oh43xM	151.133	109.6	145.333	125.133	0.721906
Oh7B	135.5	118	148.714	113.857	0.86757
Oh7BxB	140.375	142.125	172.312	116.375	1.01209
Oh7BxM	141.722	118.222	150	116.222	0.833438
P39	162.062	148.438	187.25	143.062	0.916282
P39xB	160.312	205.562	240.625	138.375	1.2819
P39xM	156.059	145.471	179.765	129.176	0.929706
B73	152.812	185.062	217.062	127.562	1.21071
Mo17	150.375	97.6875	133.938	124.25	0.64888
